# Supplementary material for: Time-Course Analysis of Brain Regional Expression Network Responses to Chronic Intermittent Ethanol and Withdrawal: Implications for Mechanisms Underlying Excessive Ethanol Consumption
Source: PubMed Central journal article supplement (PMC4701666; doi:10.1371/journal.pone.0146257), 2016-01-05

B6Exp1 HPC WGCNA-DS3 Multidimensional Scaling

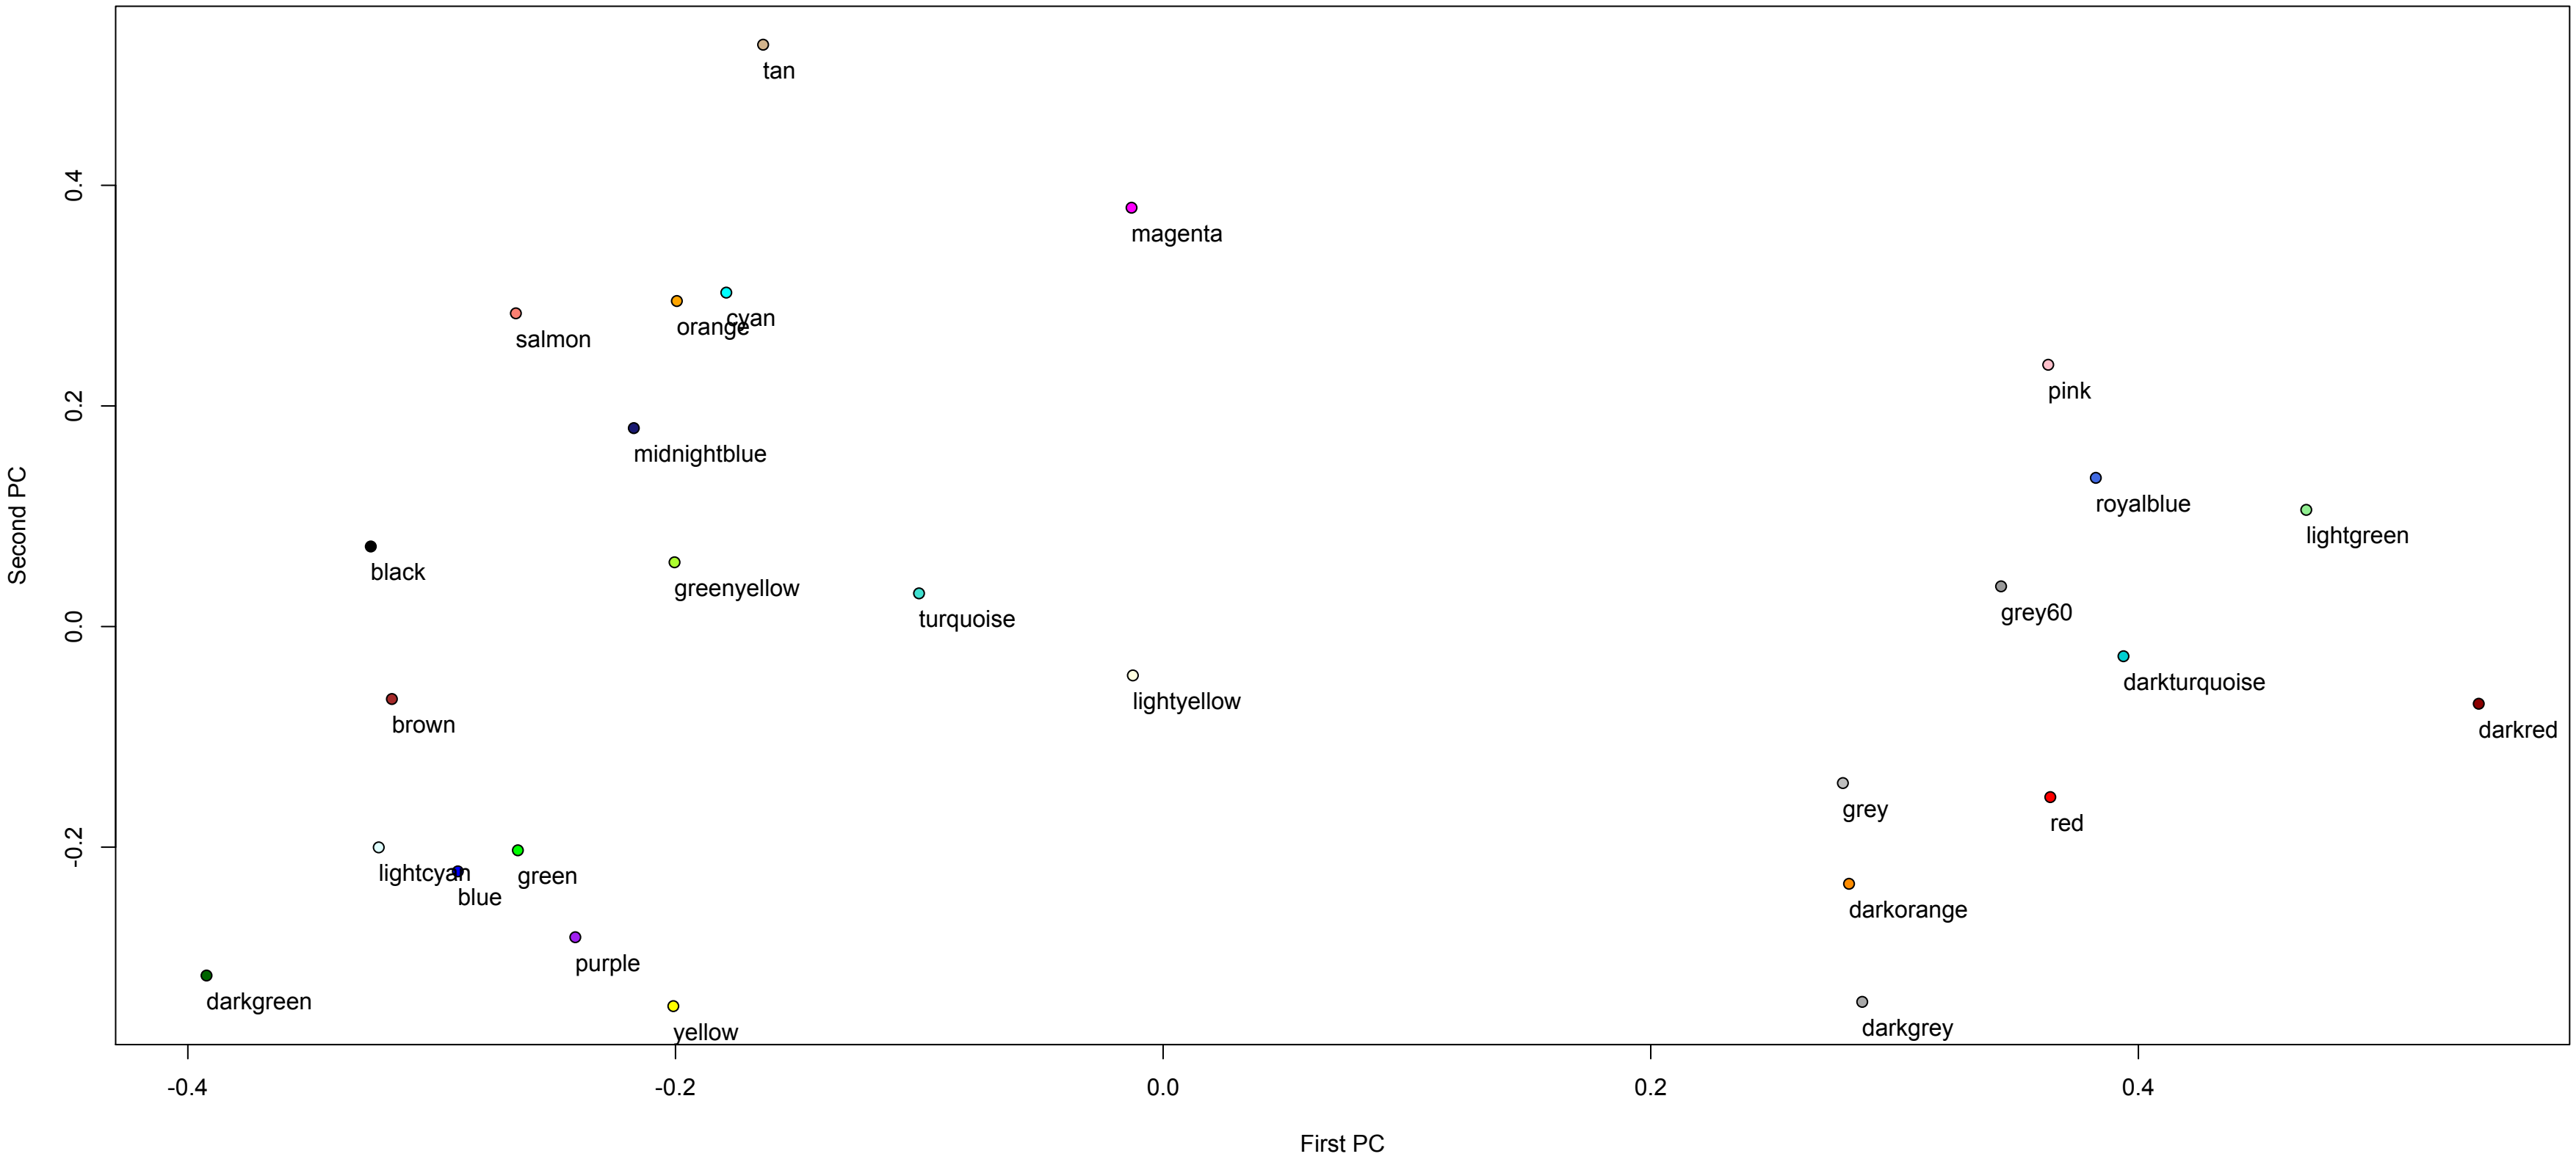

# B6Exp1 HPC WGCNA-DS3 Module Eigengene Cluster Dendrogram

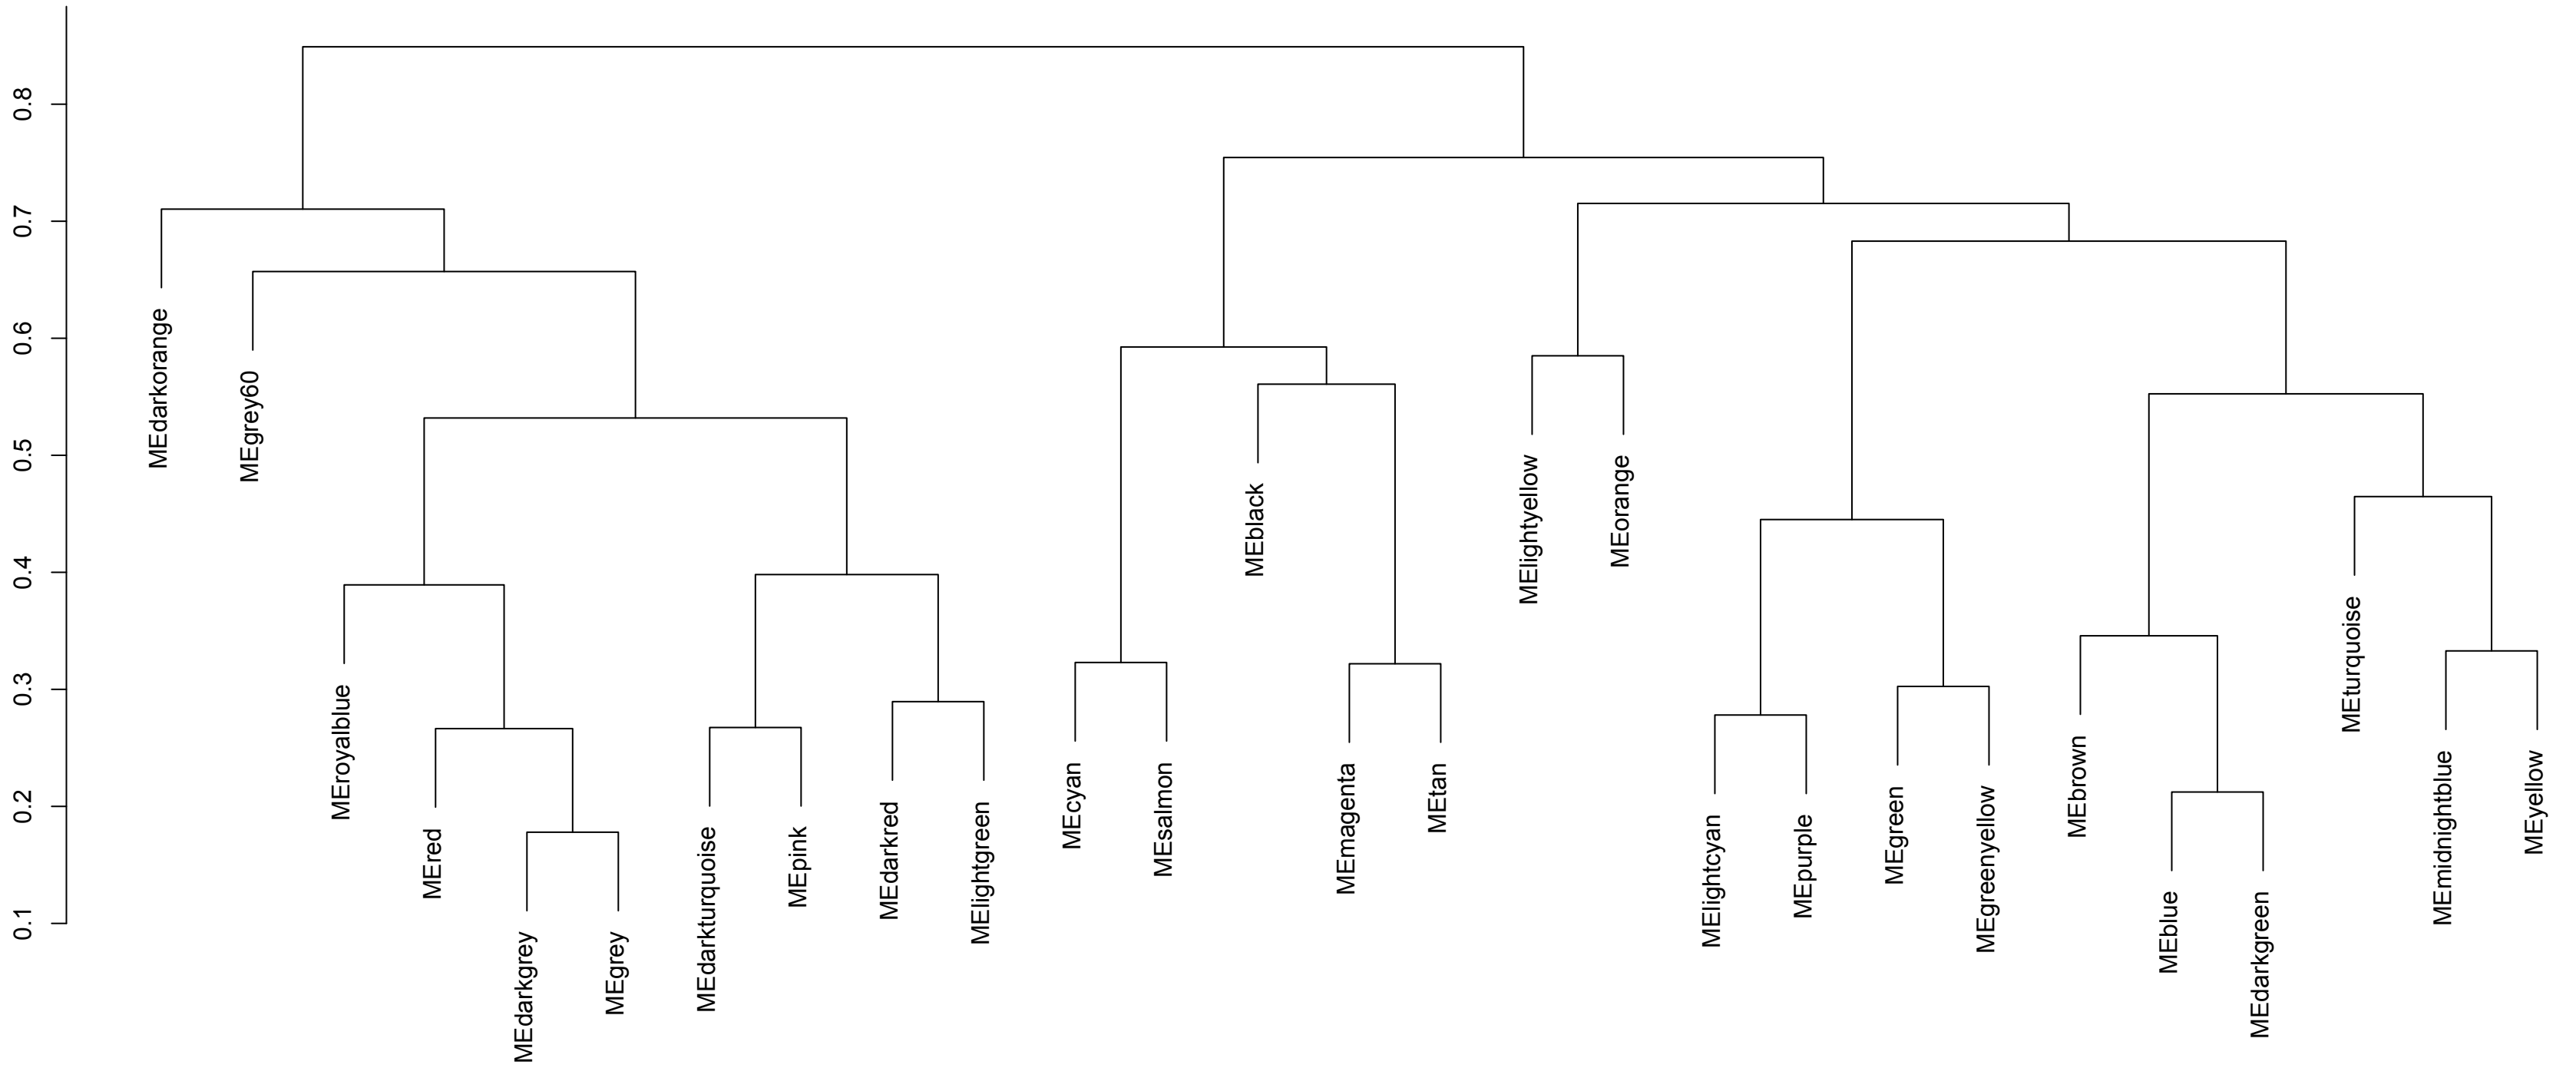

# HPC black

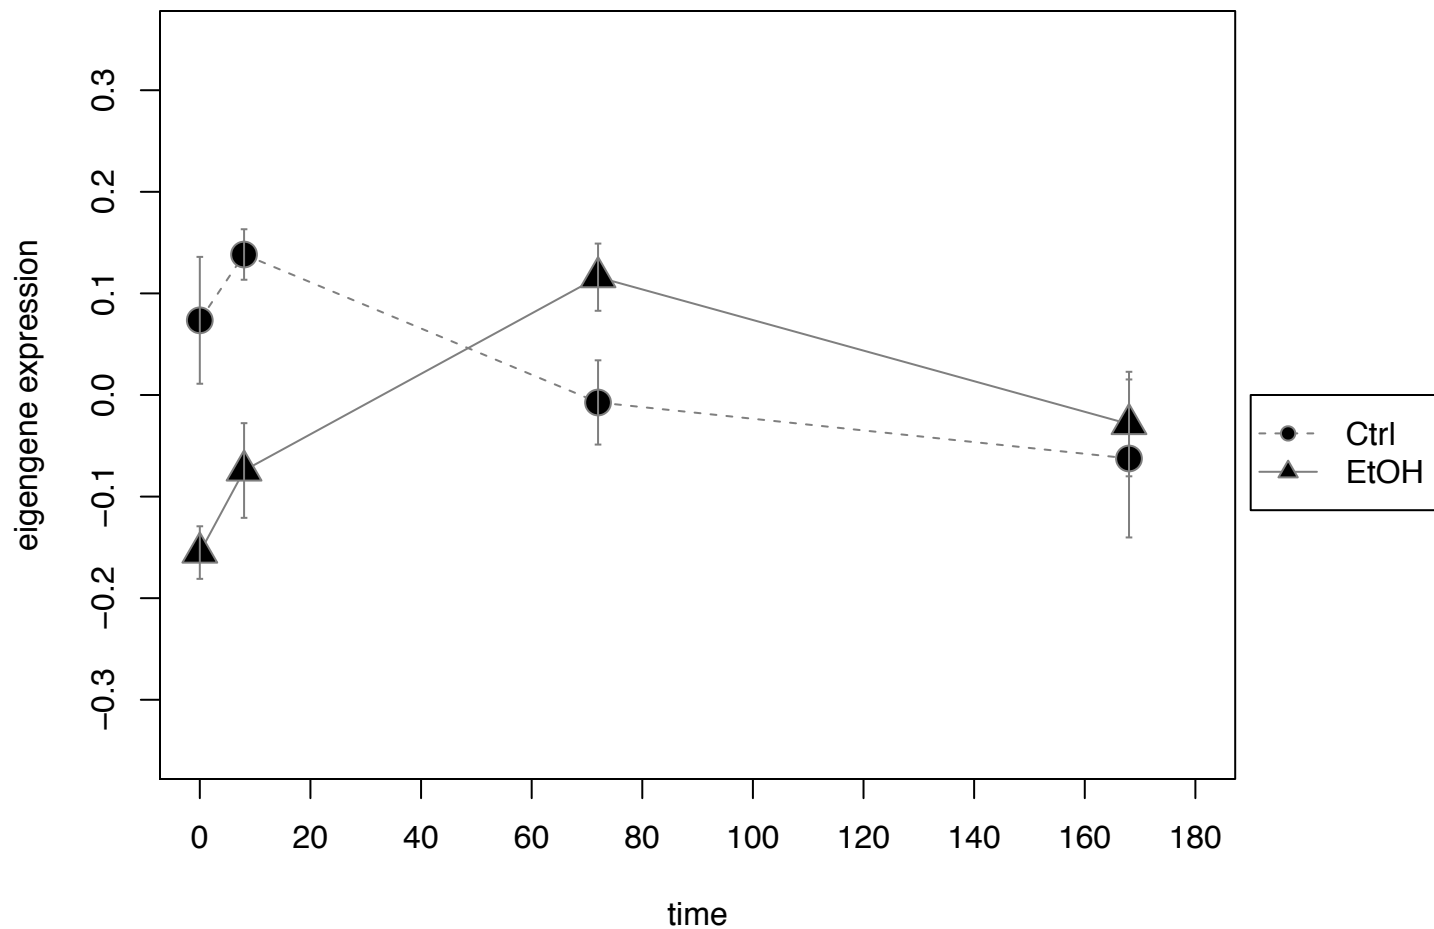

# HPC blue

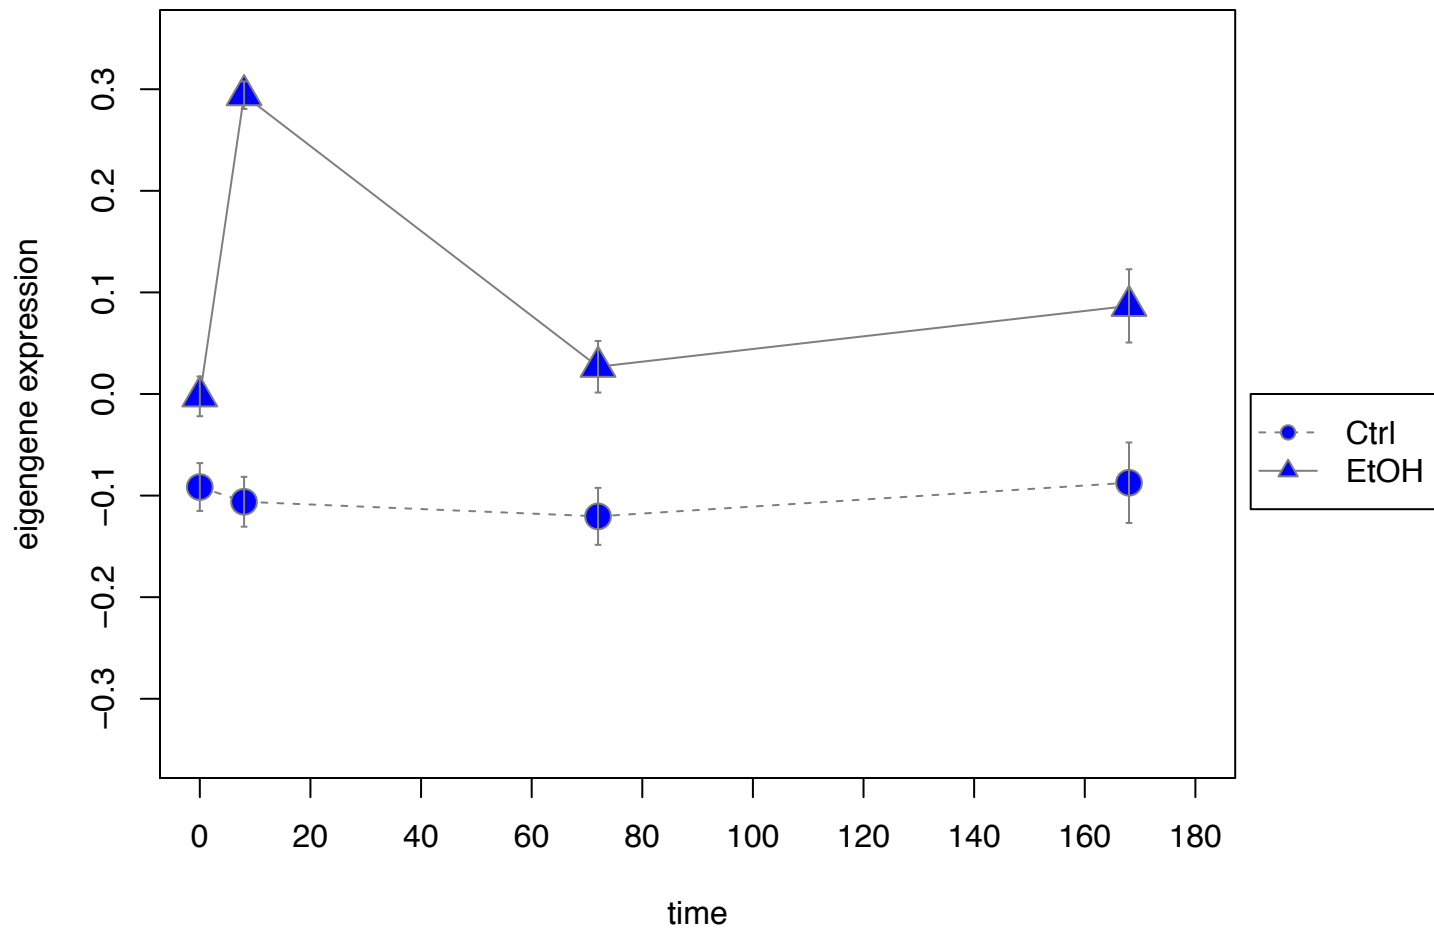

# HPC brown

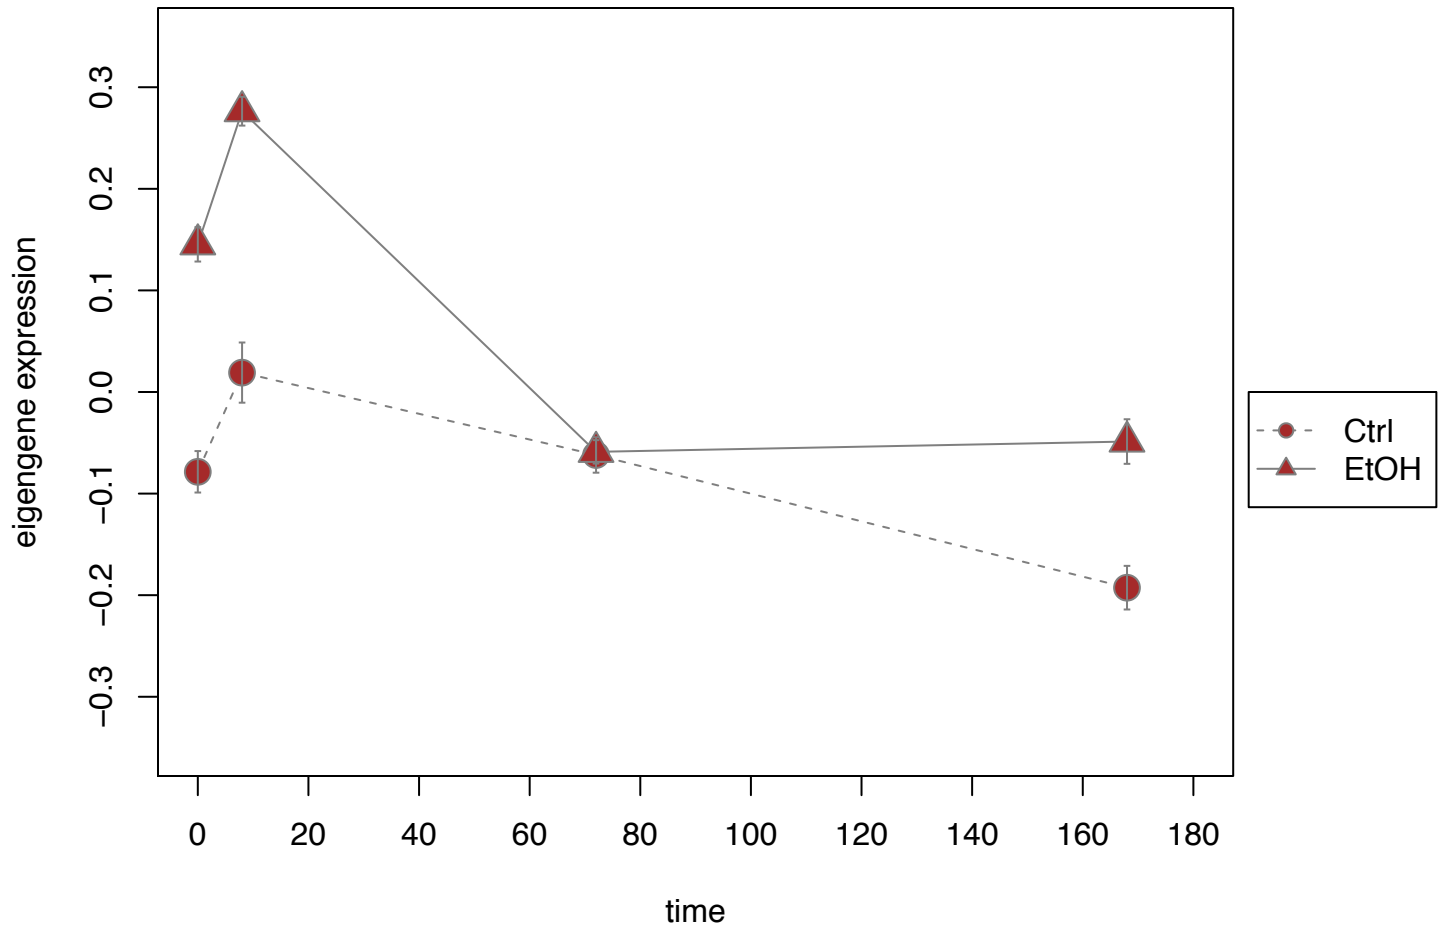

# HPC cyan

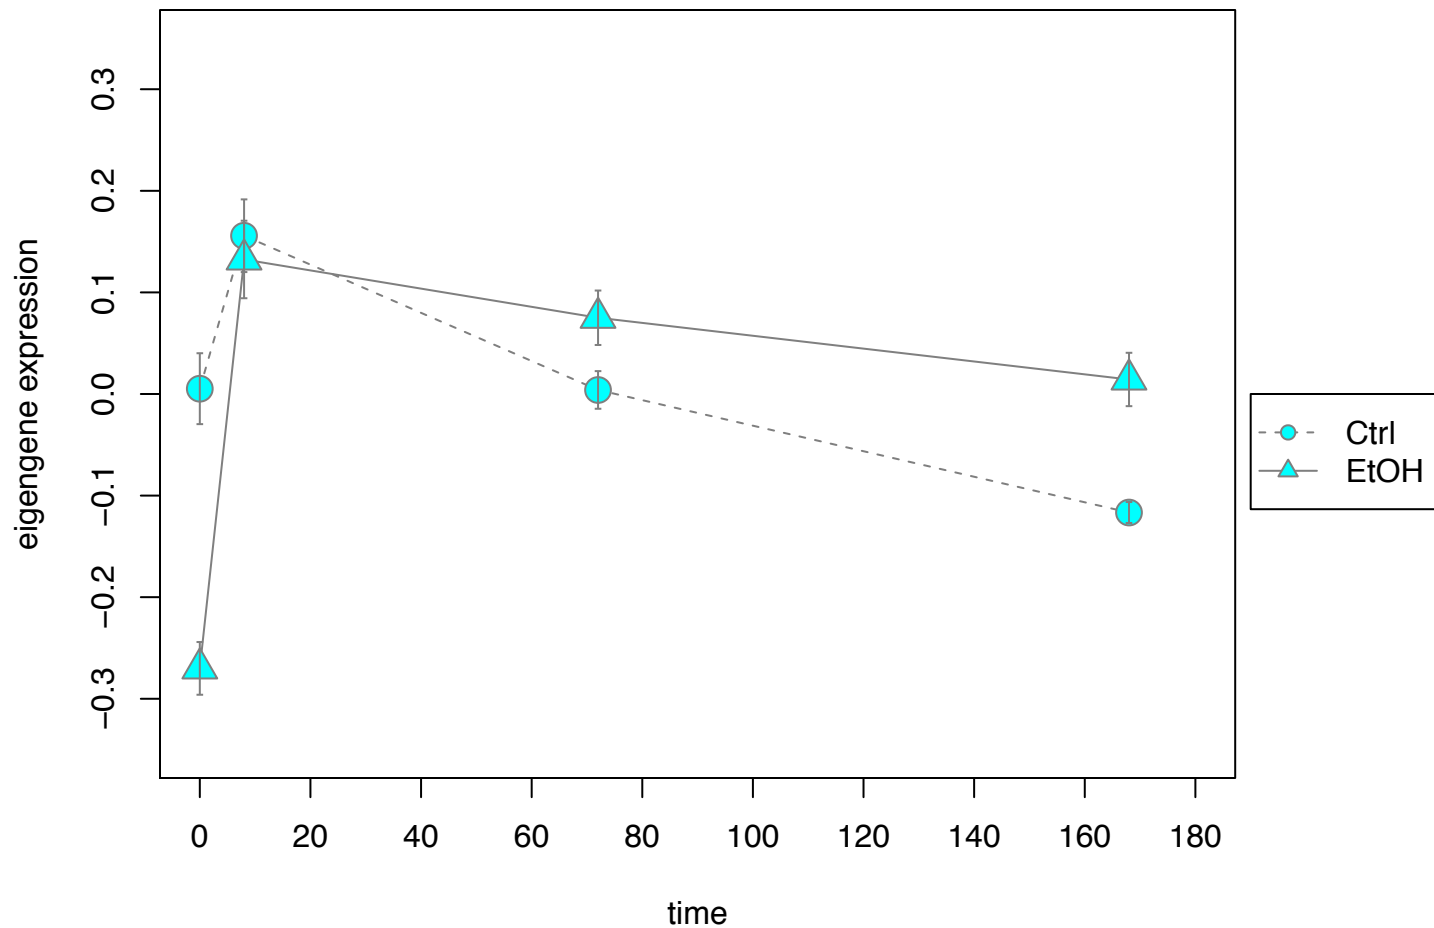

# HPC darkgreen

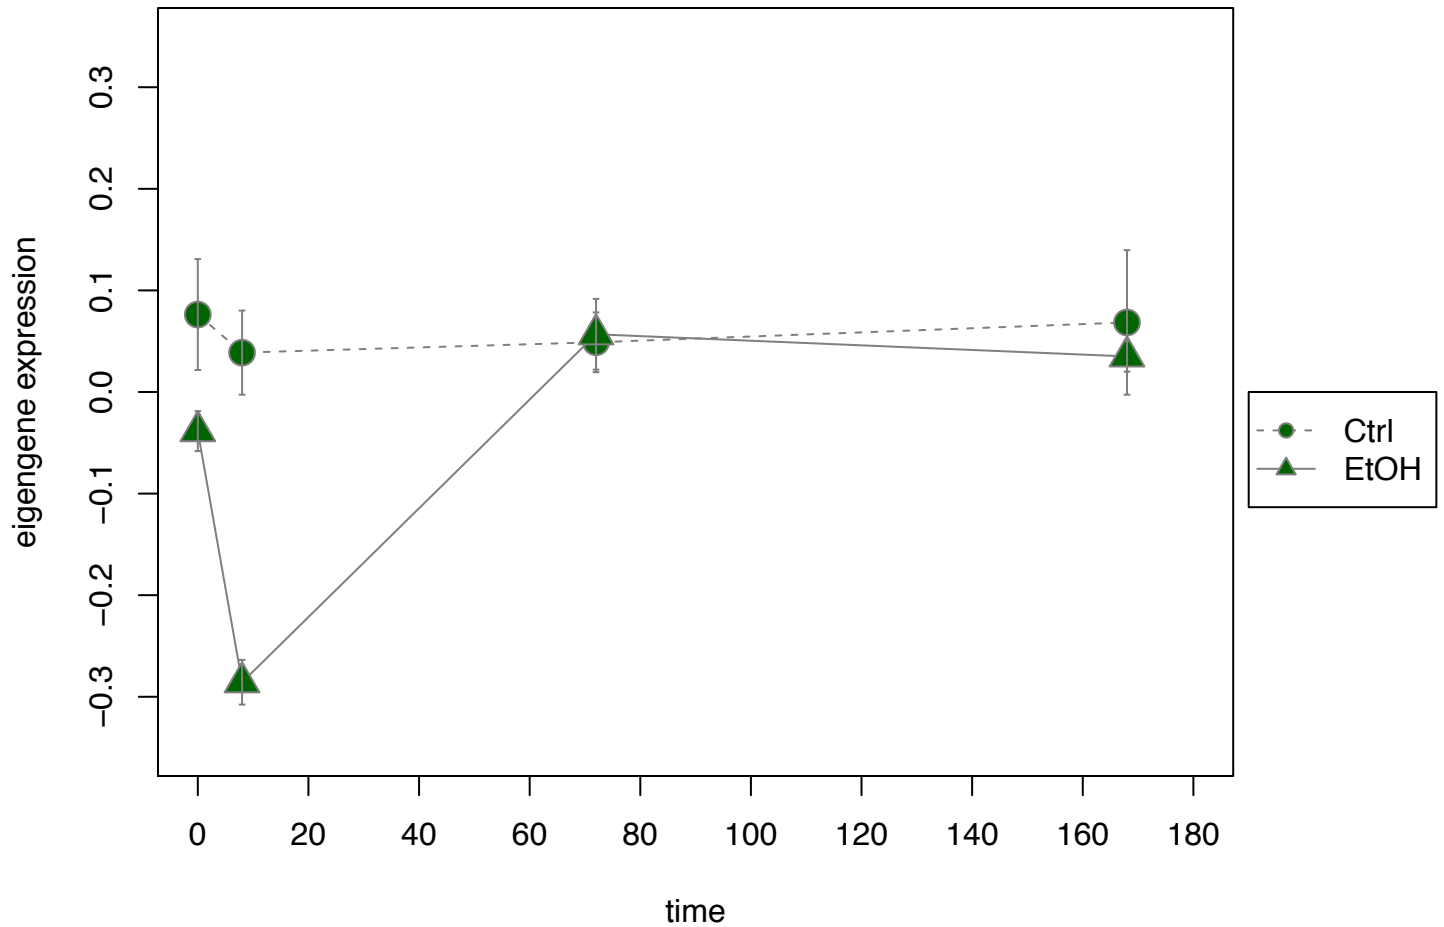

# HPC darkgrey

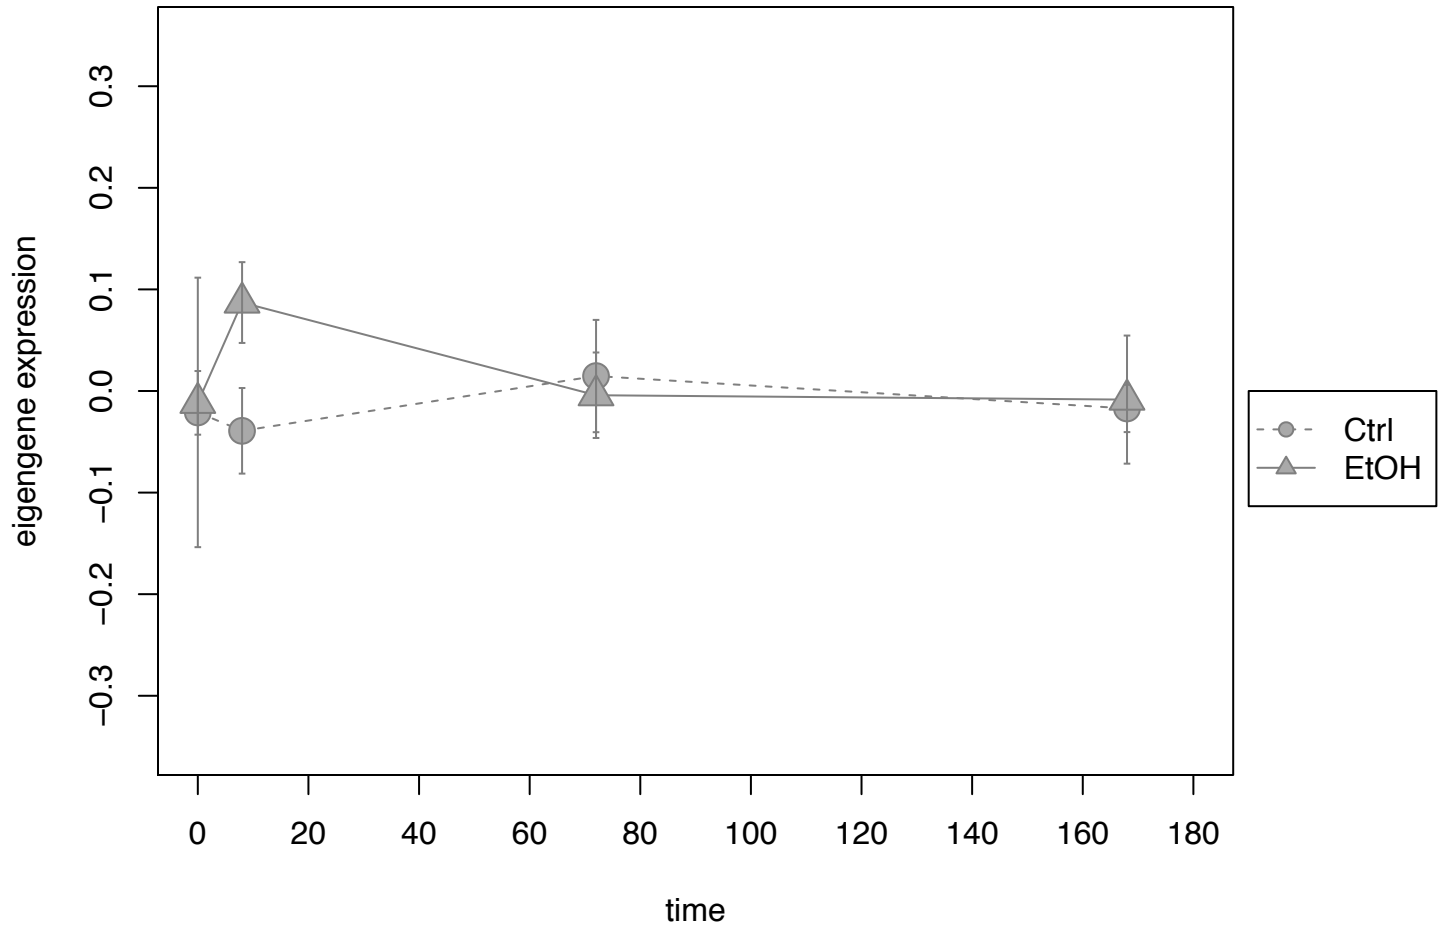



# HPC darkorange

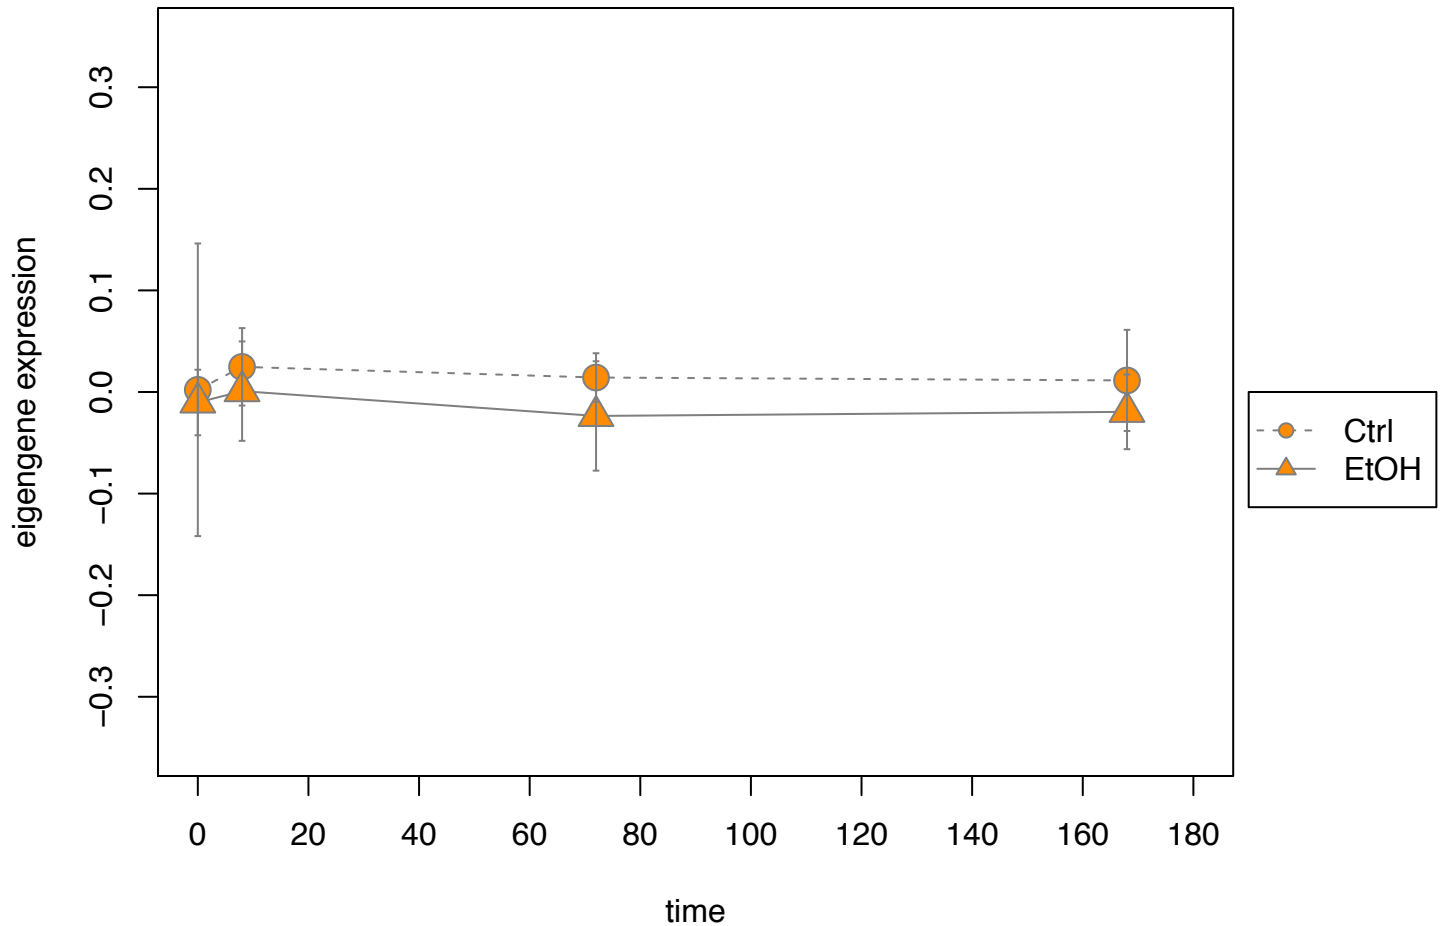

# HPC darkred

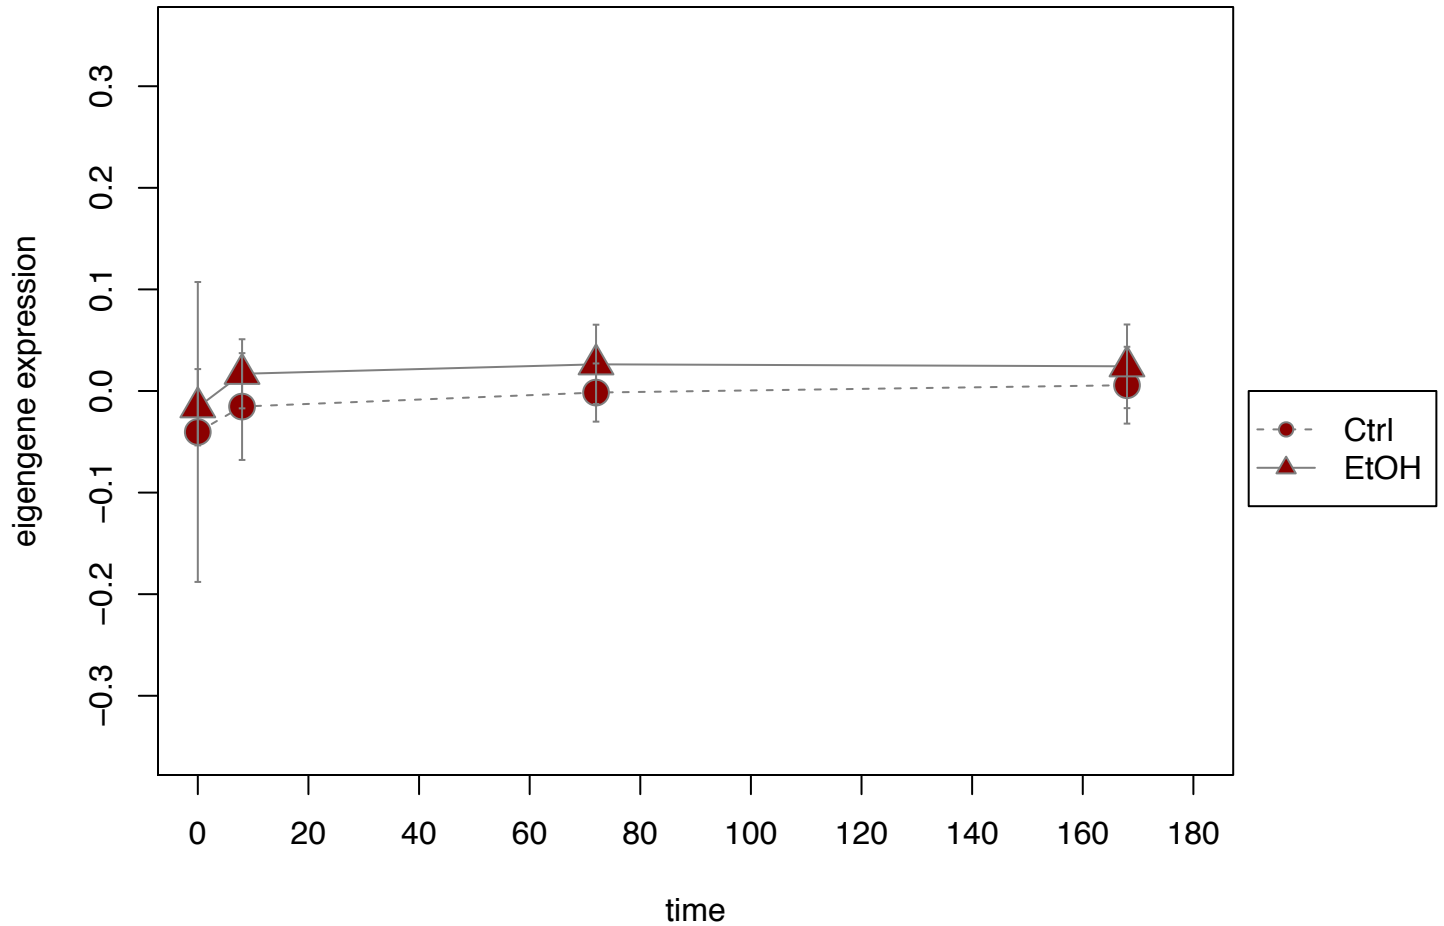

# HPC darkturquoise

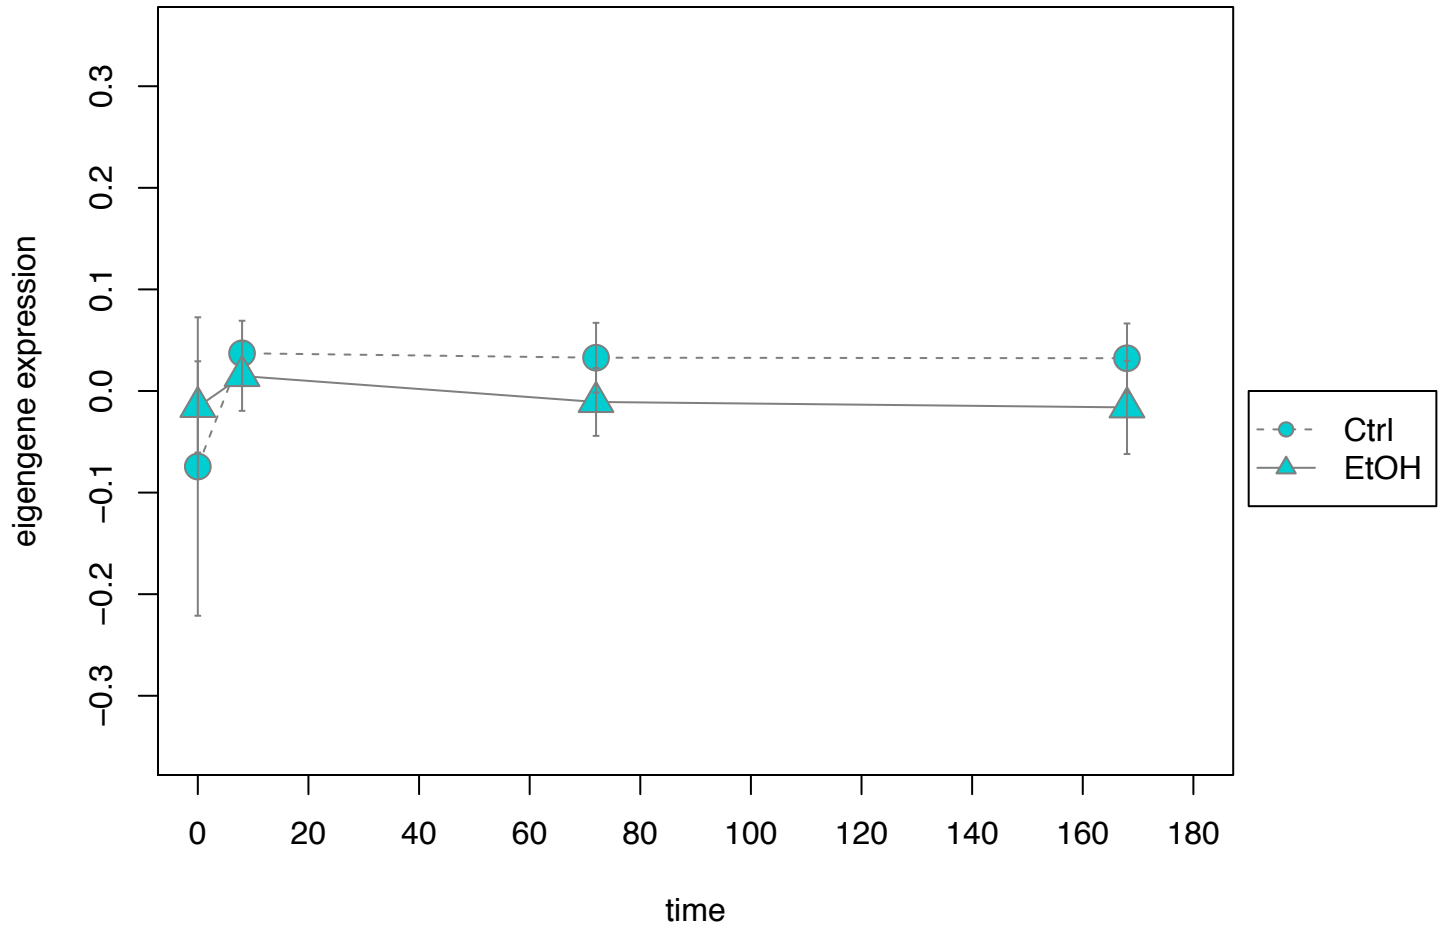

# HPC green

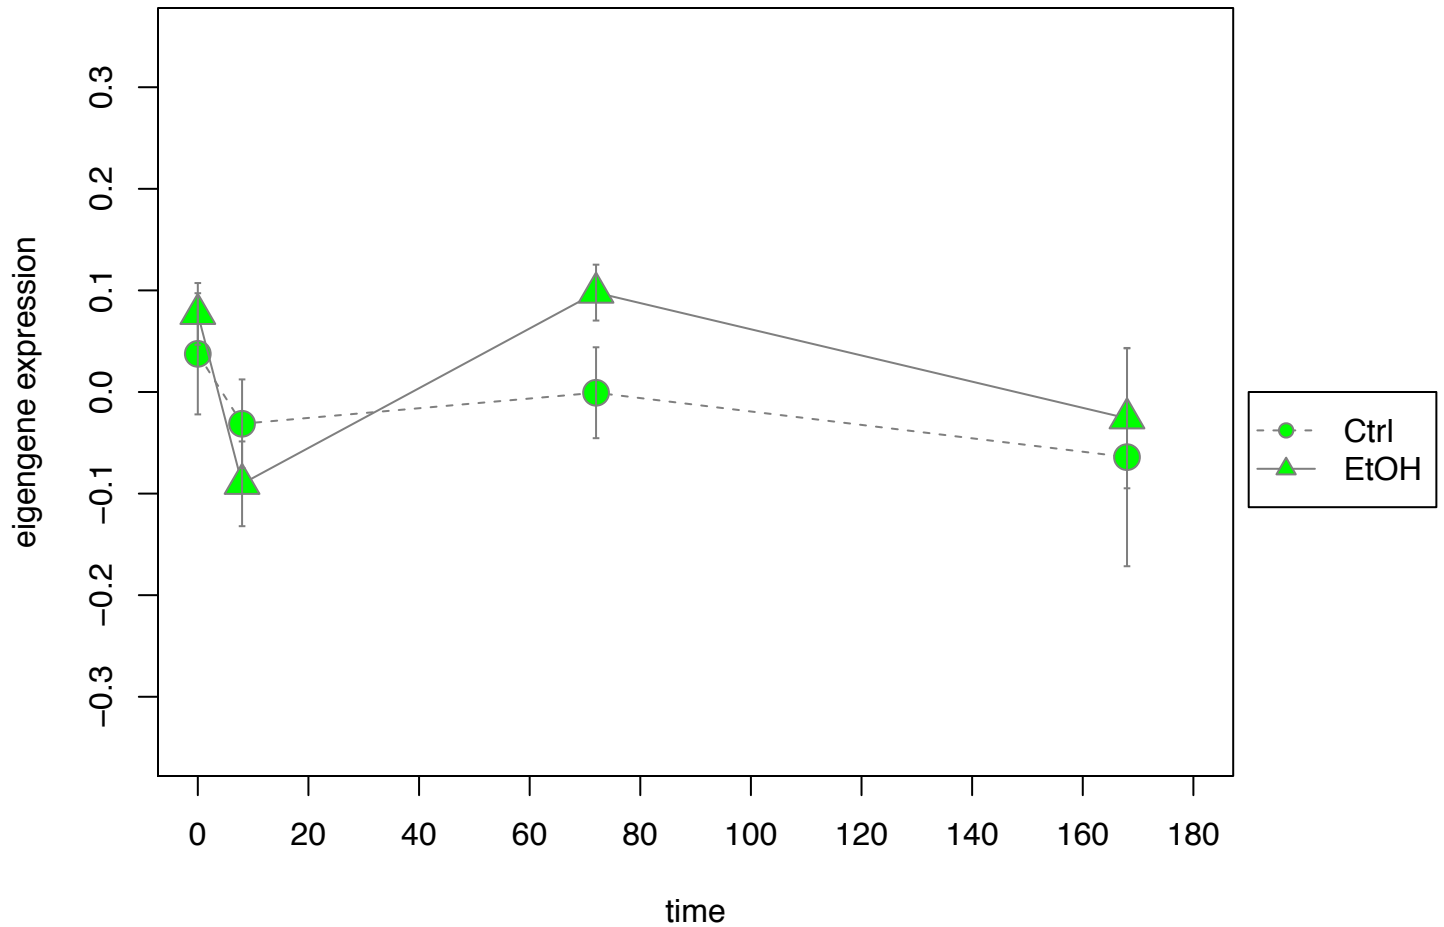

# HPC greenyellow

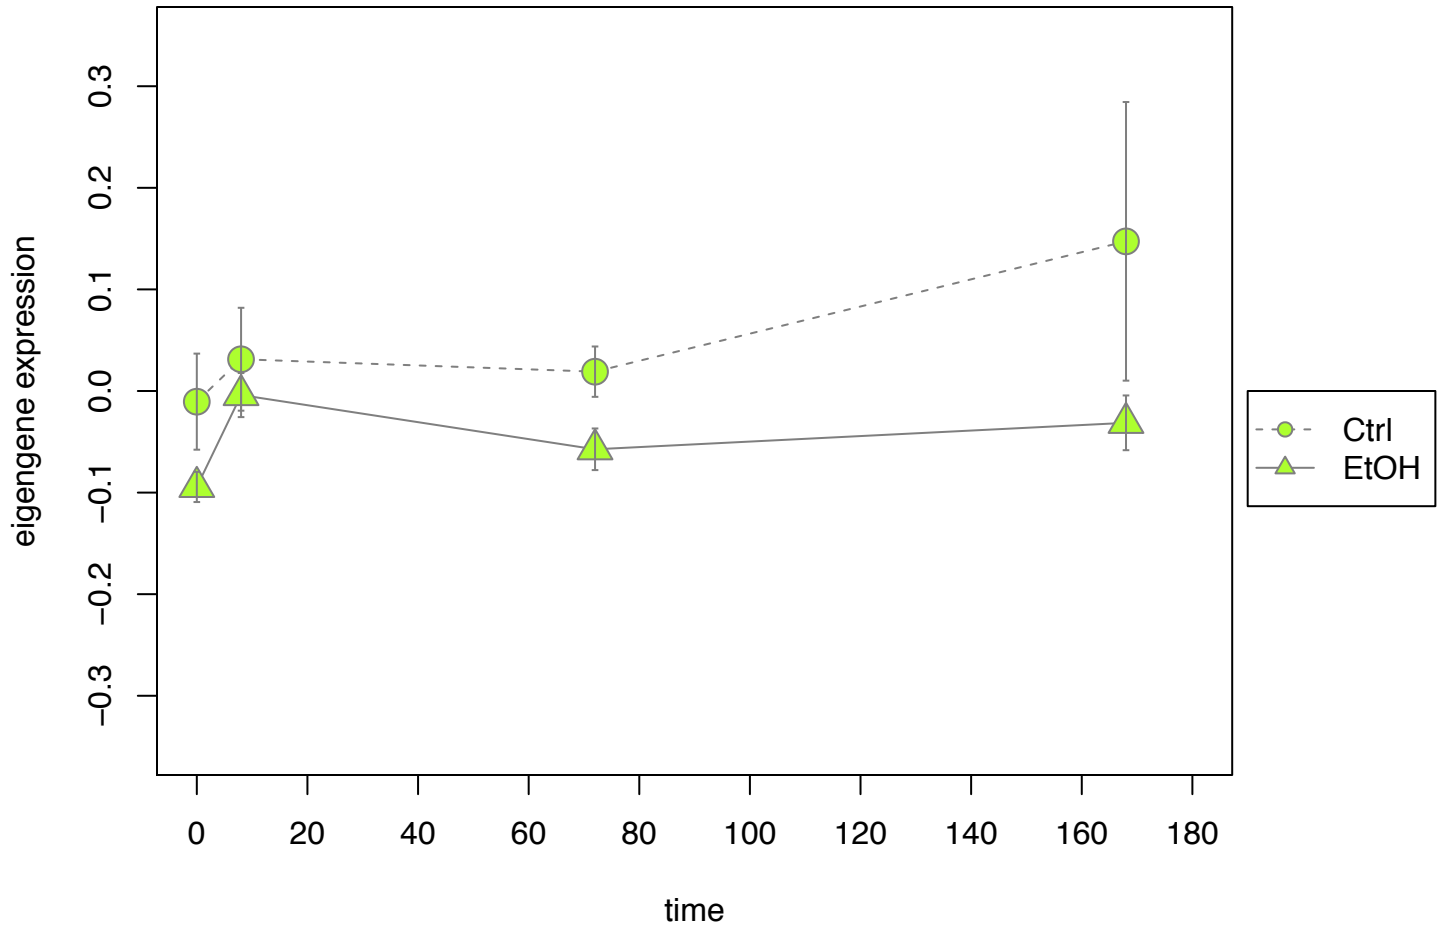

# HPC grey

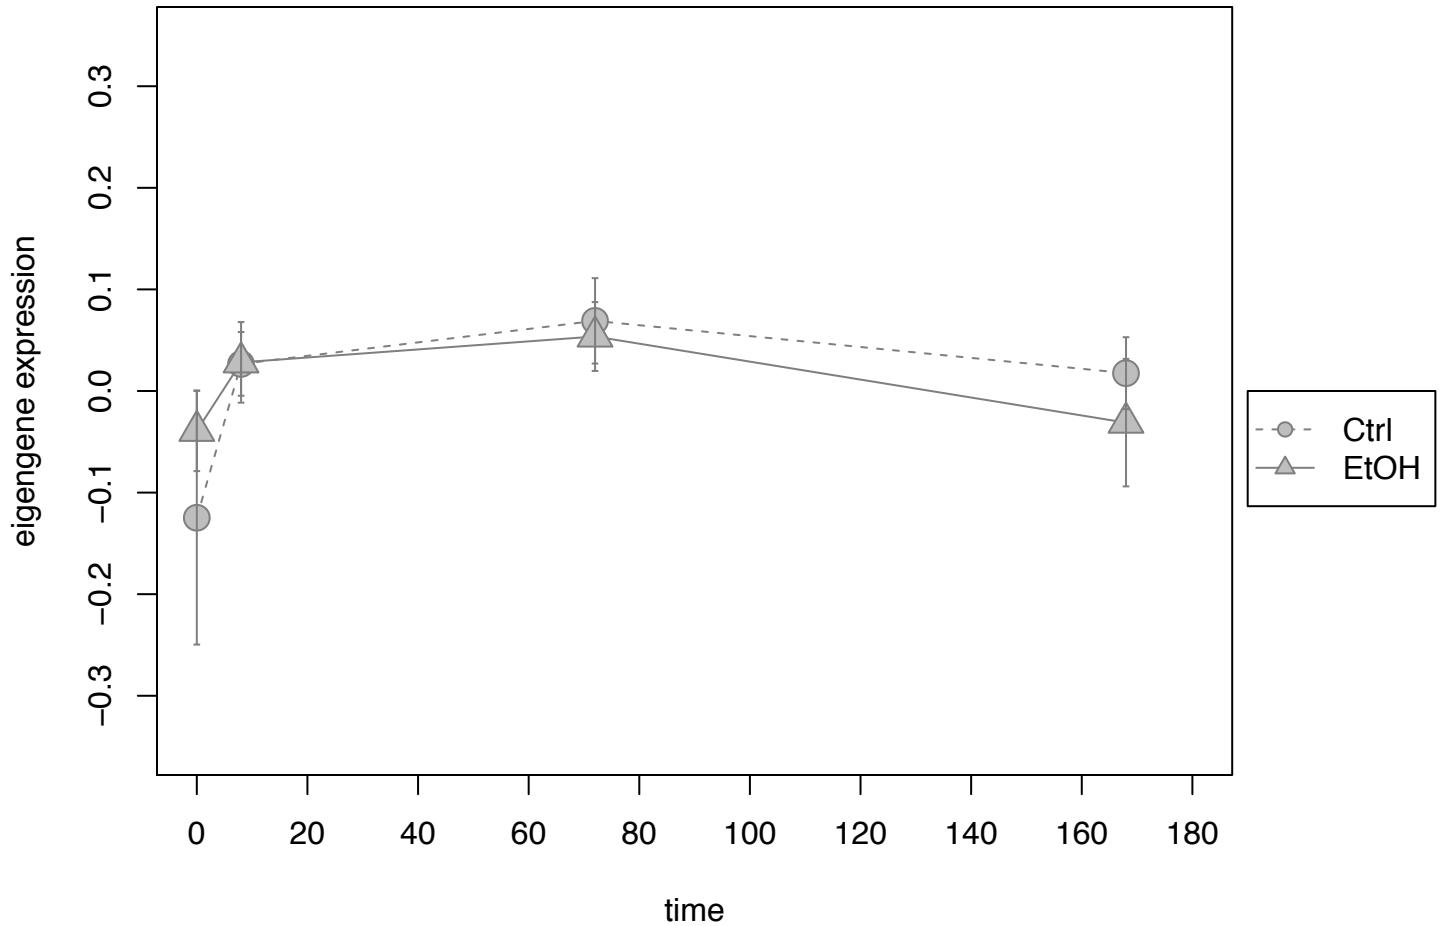

# HPC grey60

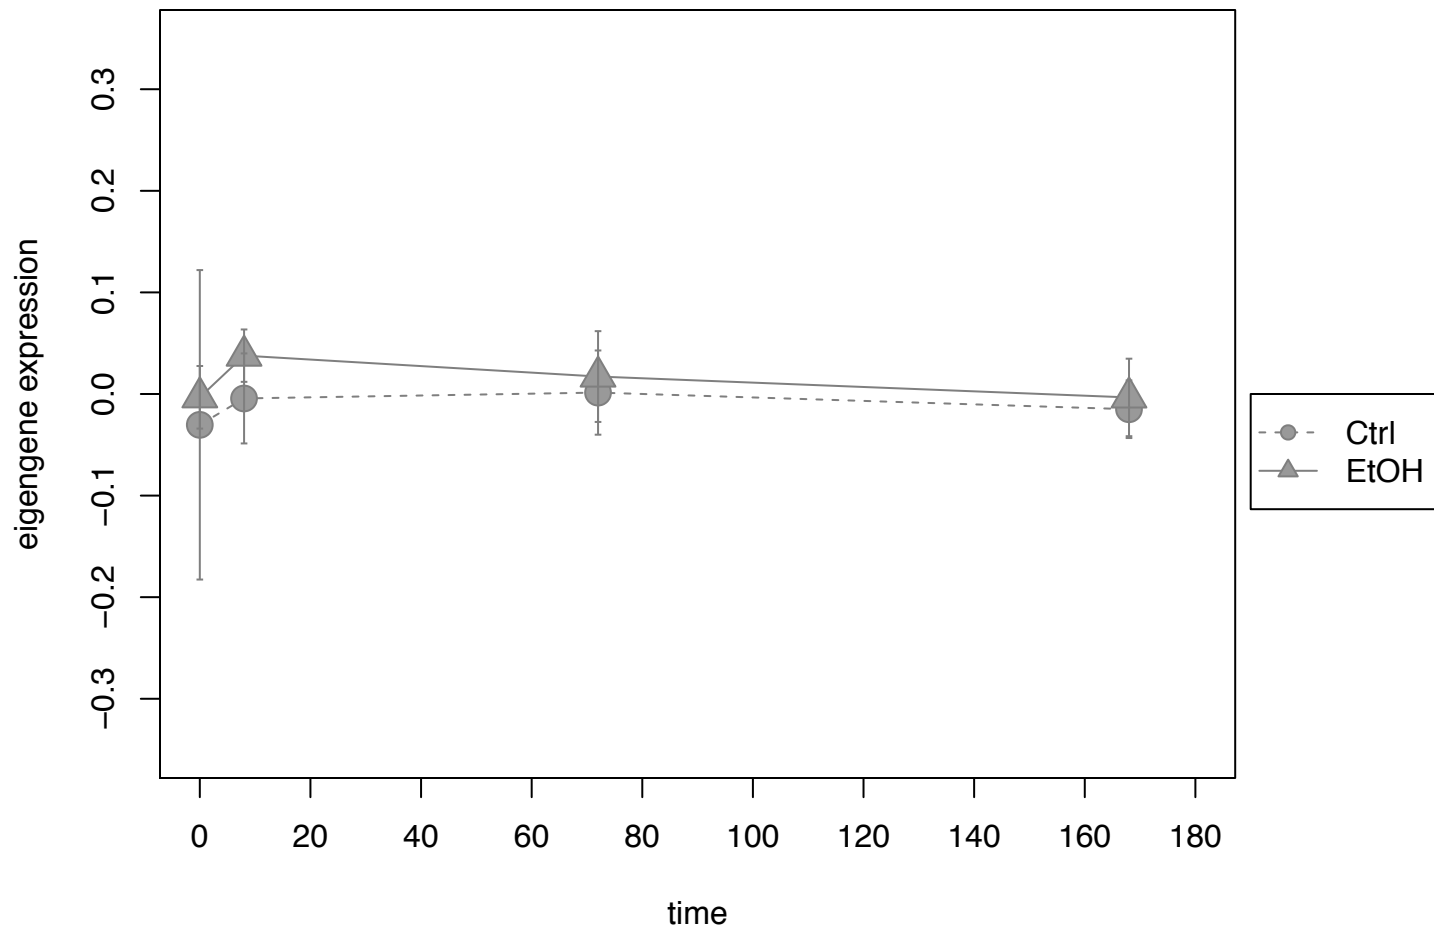

# HPC lightcyan

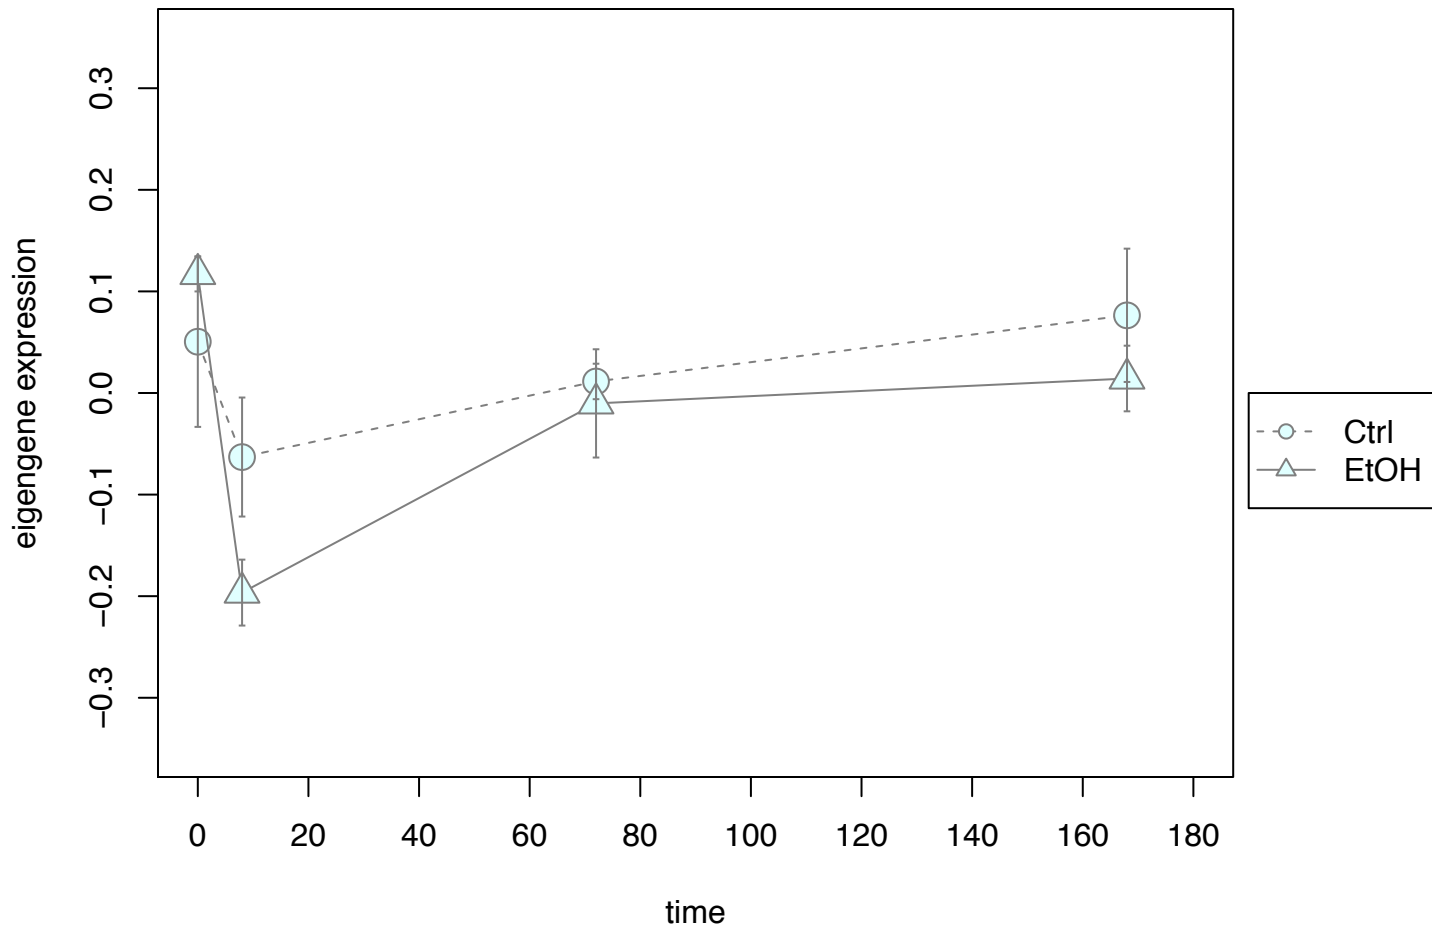



# HPC lightgreen

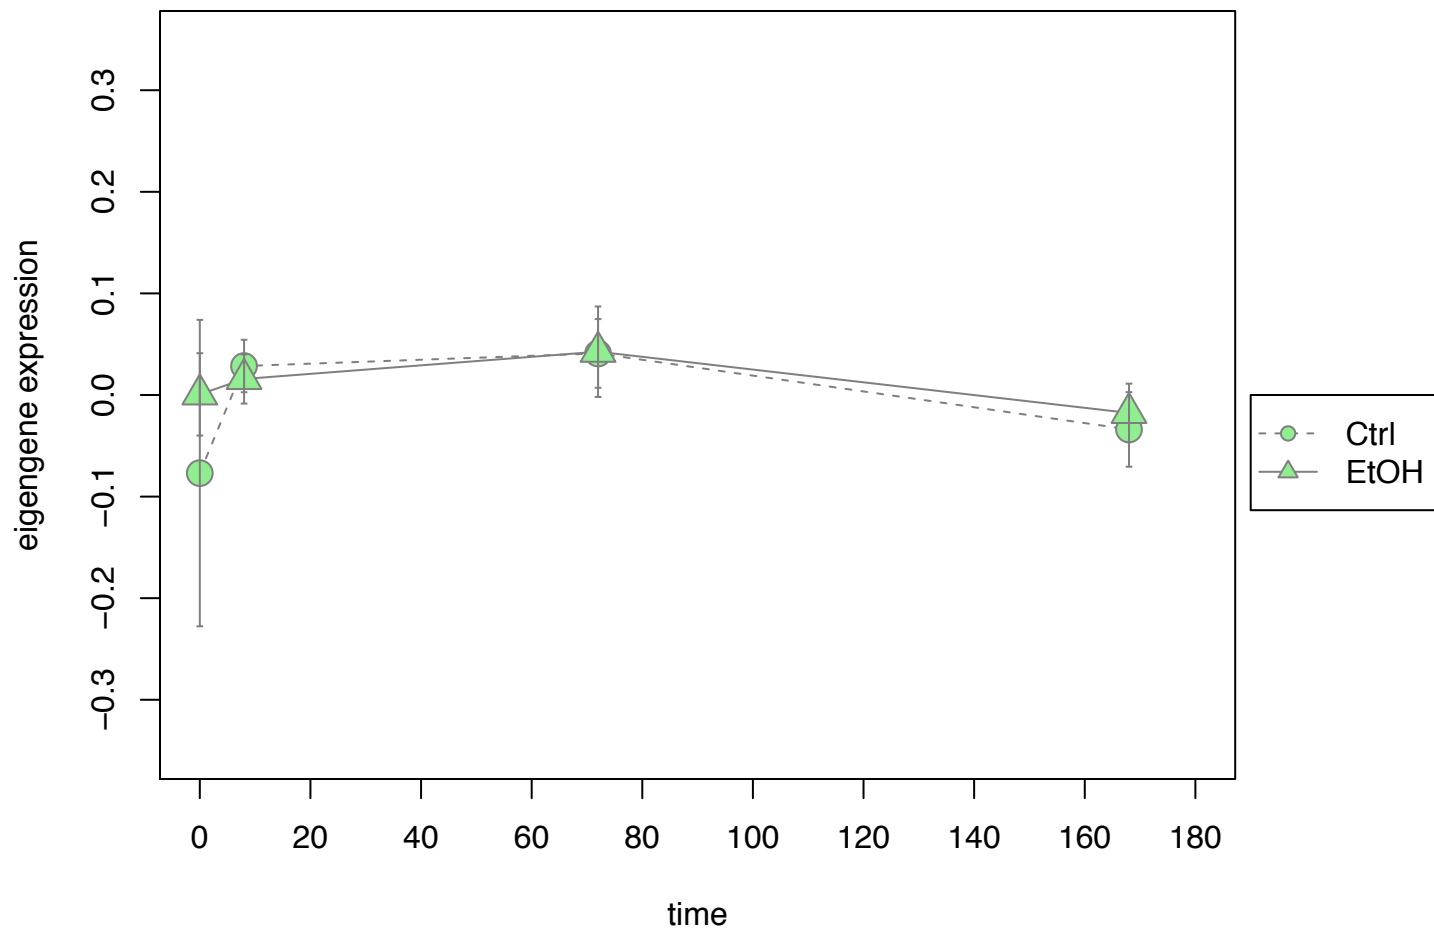

# HPC lightyellow

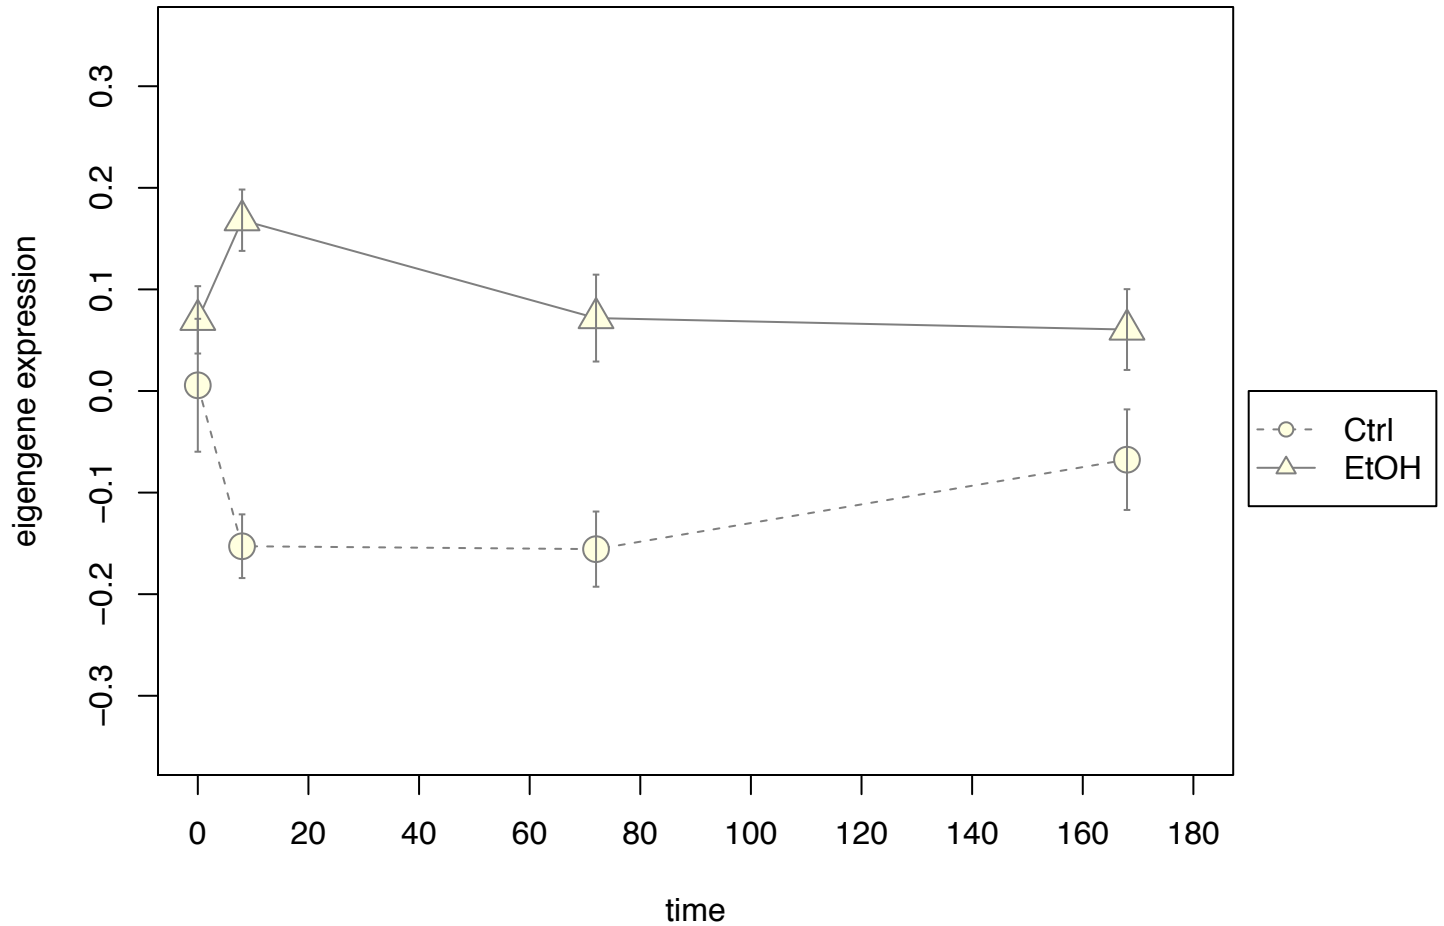

# HPC magenta

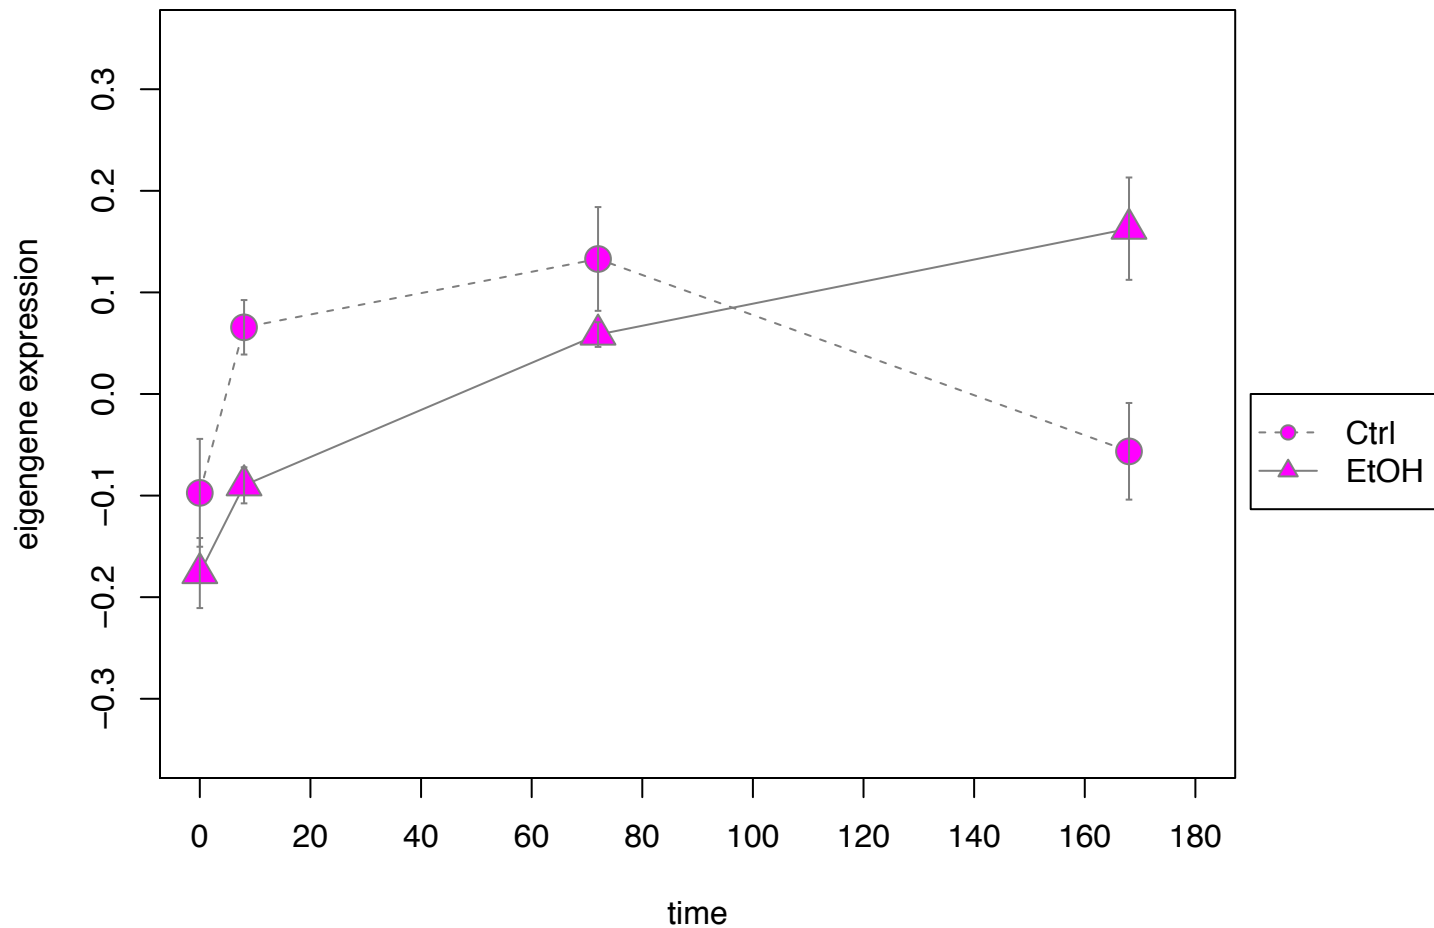

# HPC midnightblue

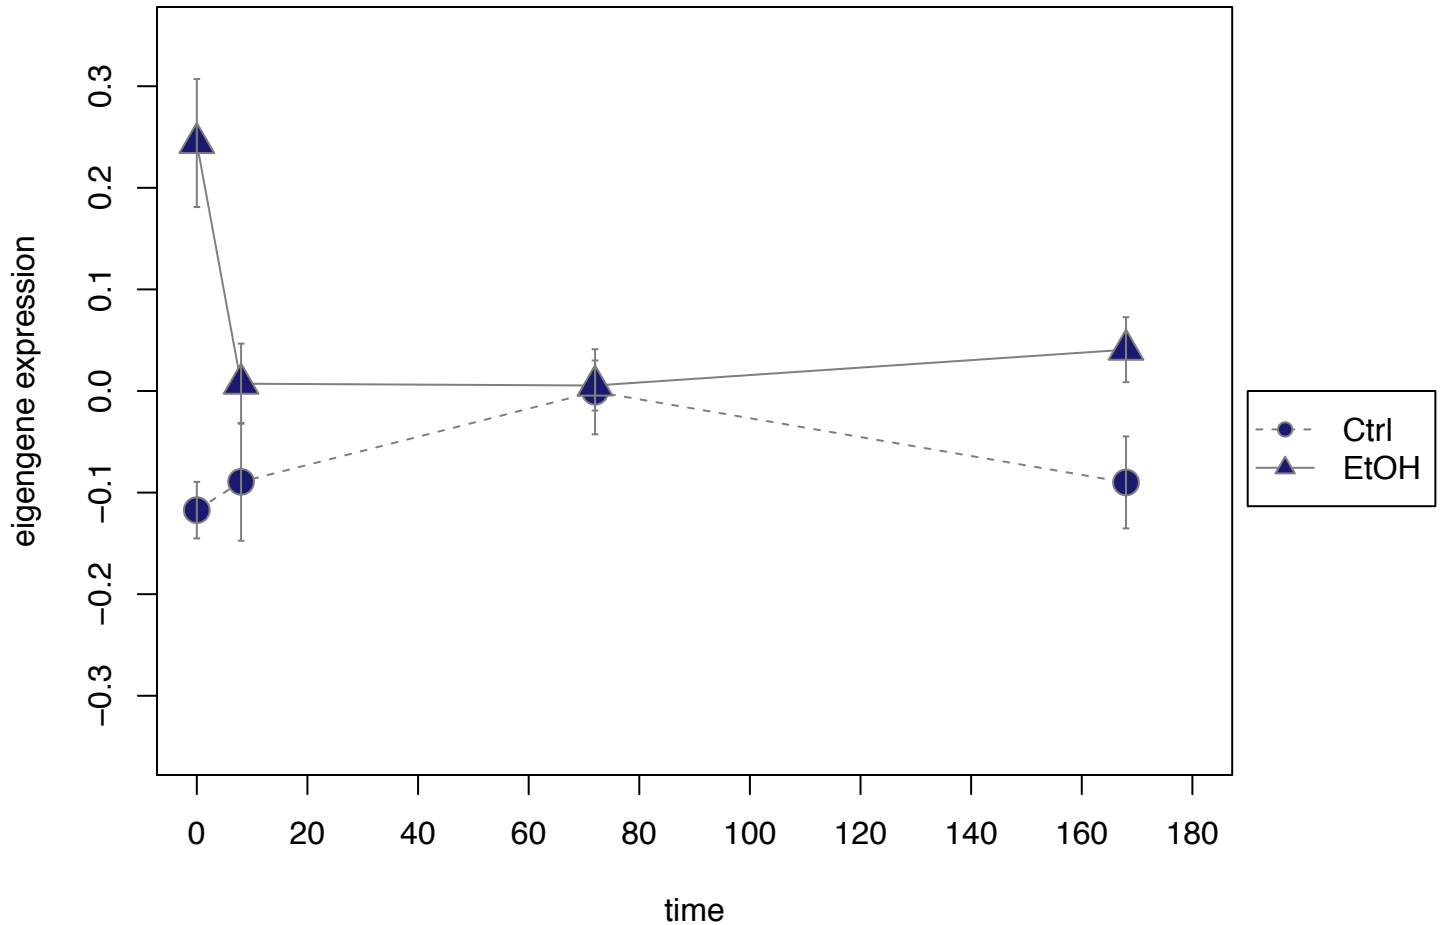

# HPC orange

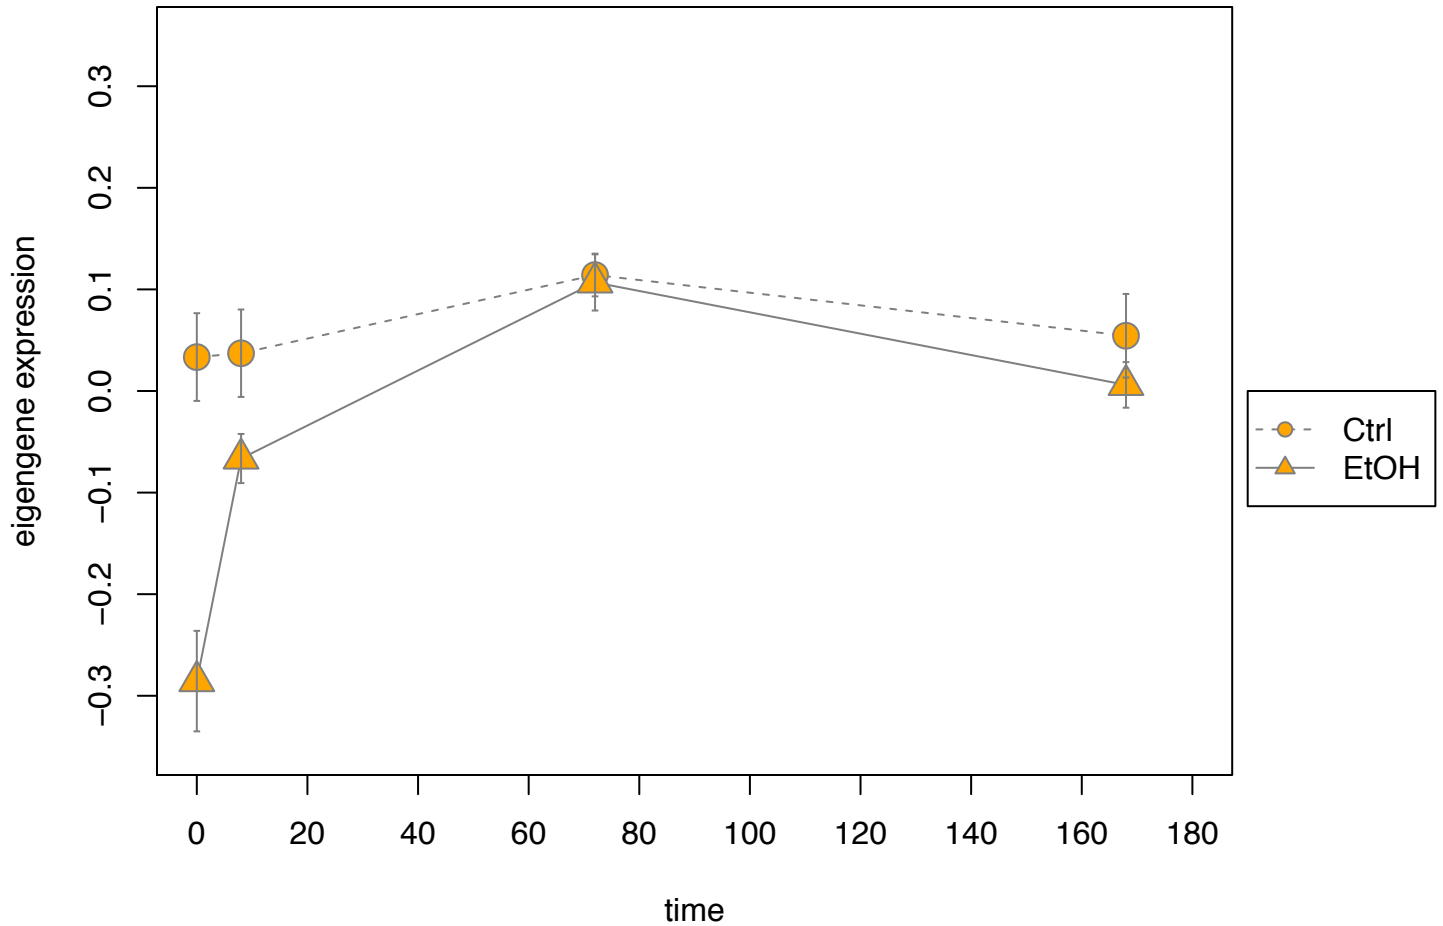

# HPC pink

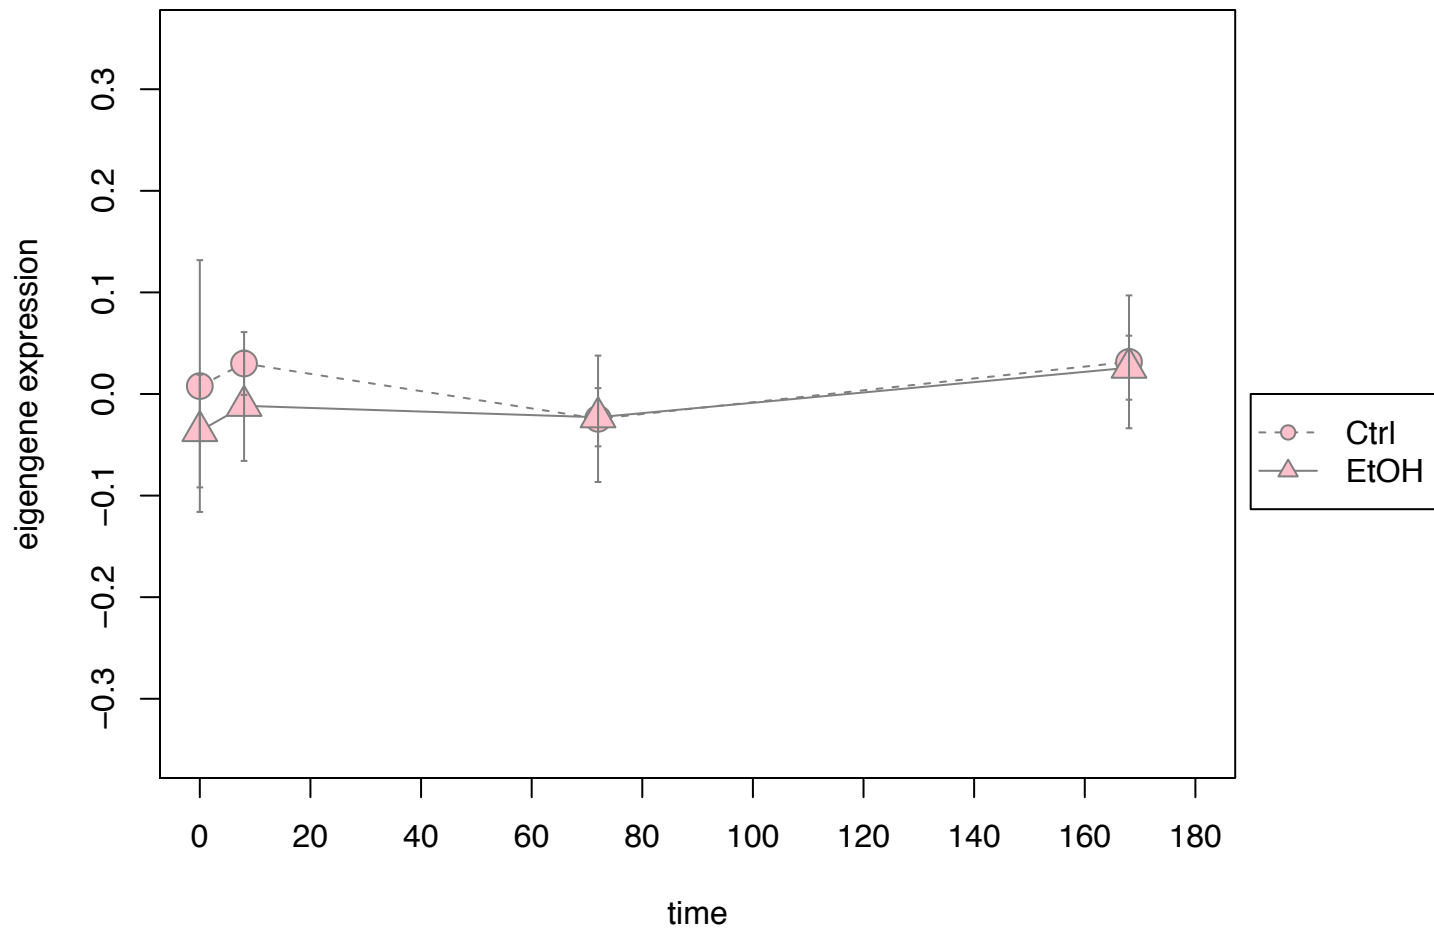

# HPC purple

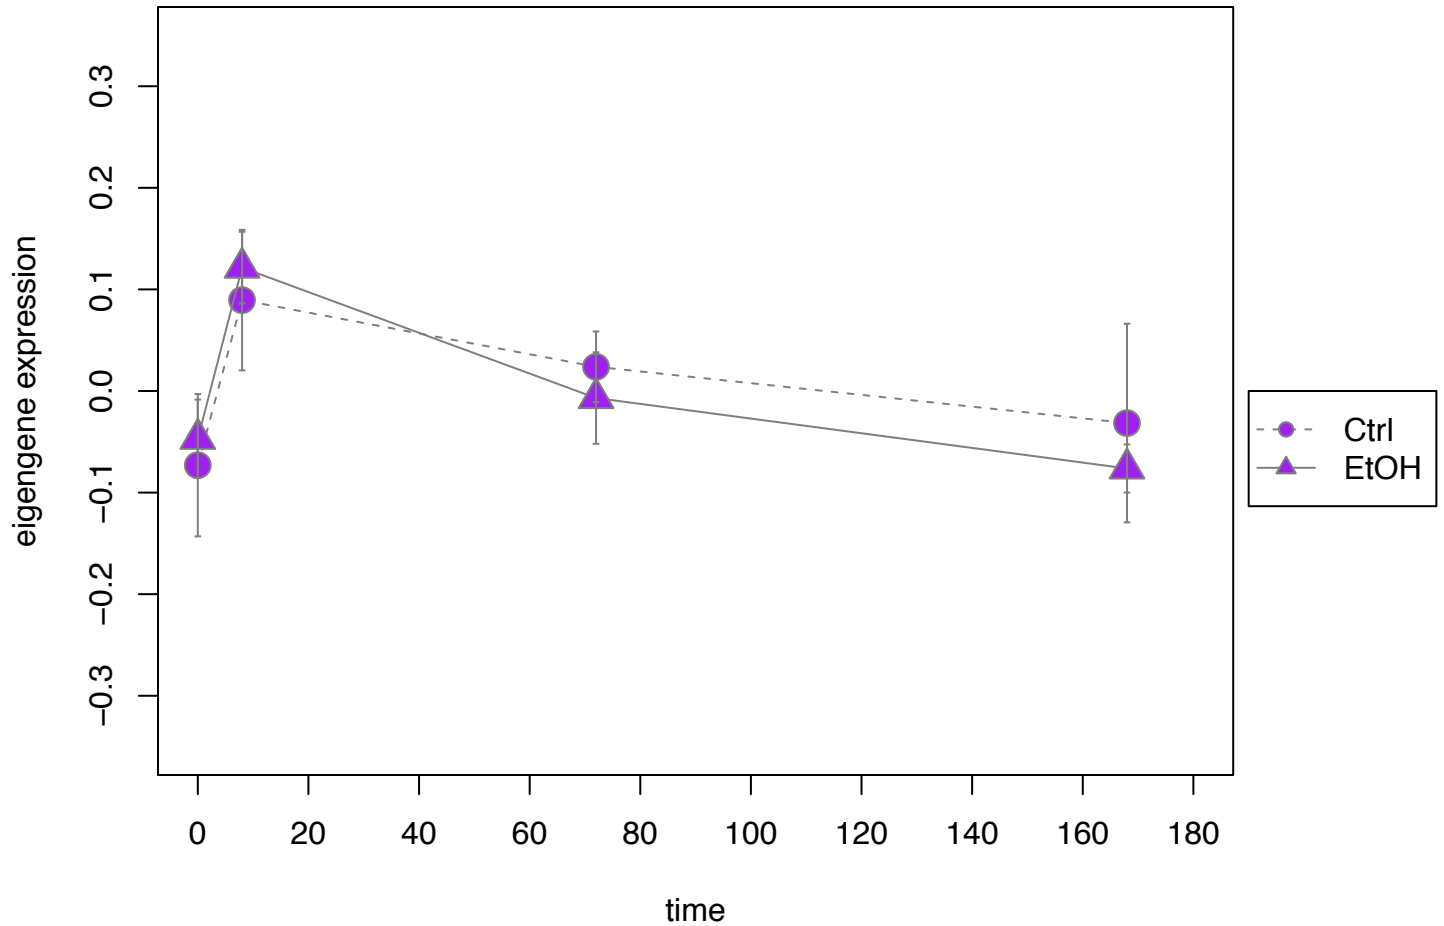

# HPC red

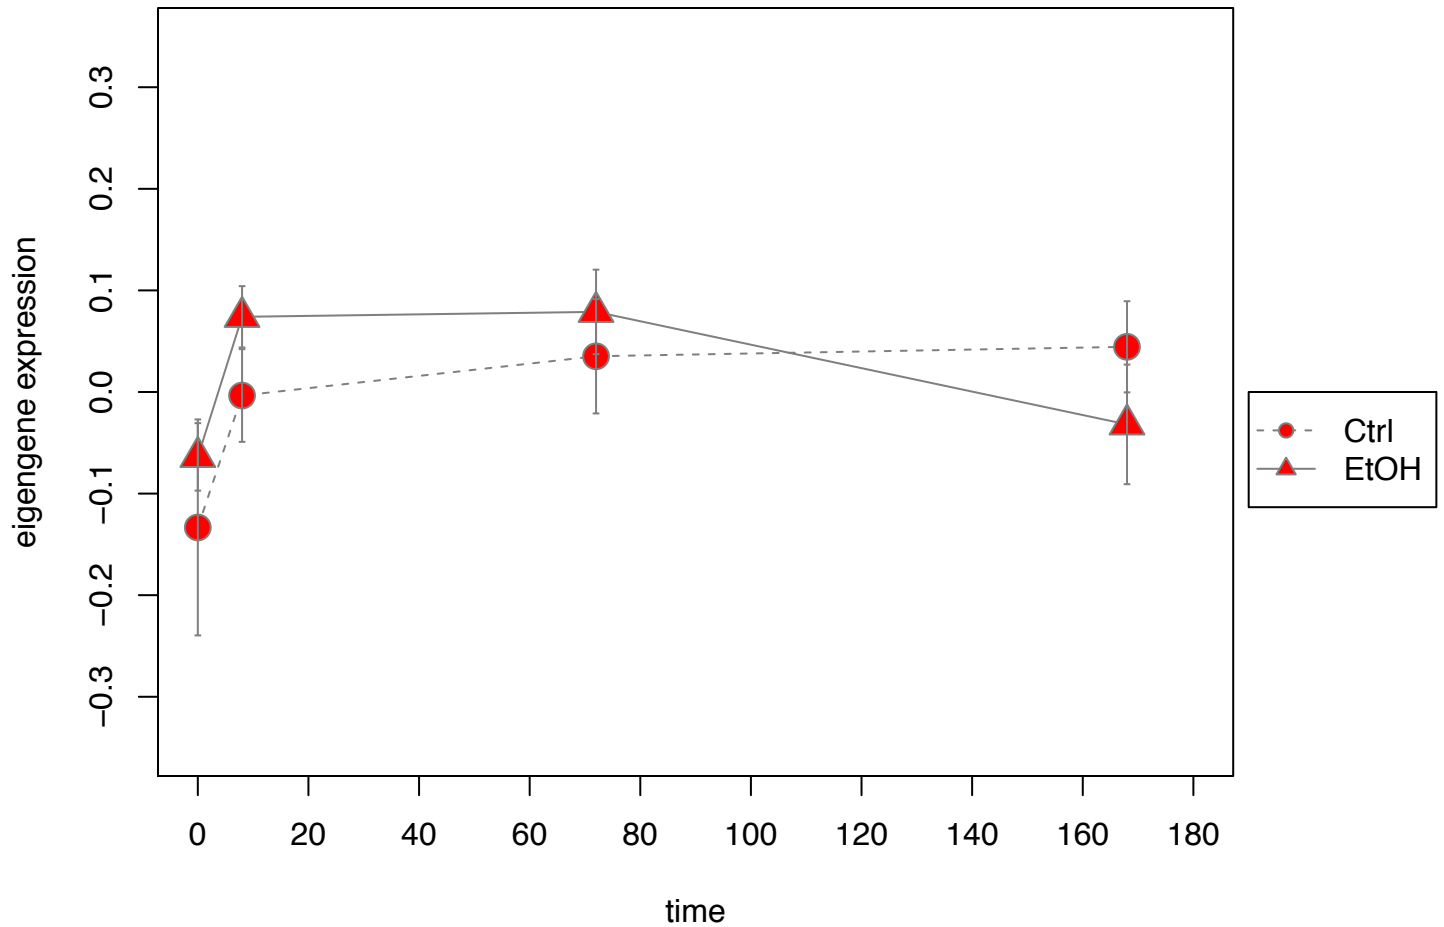



# HPC royalblue

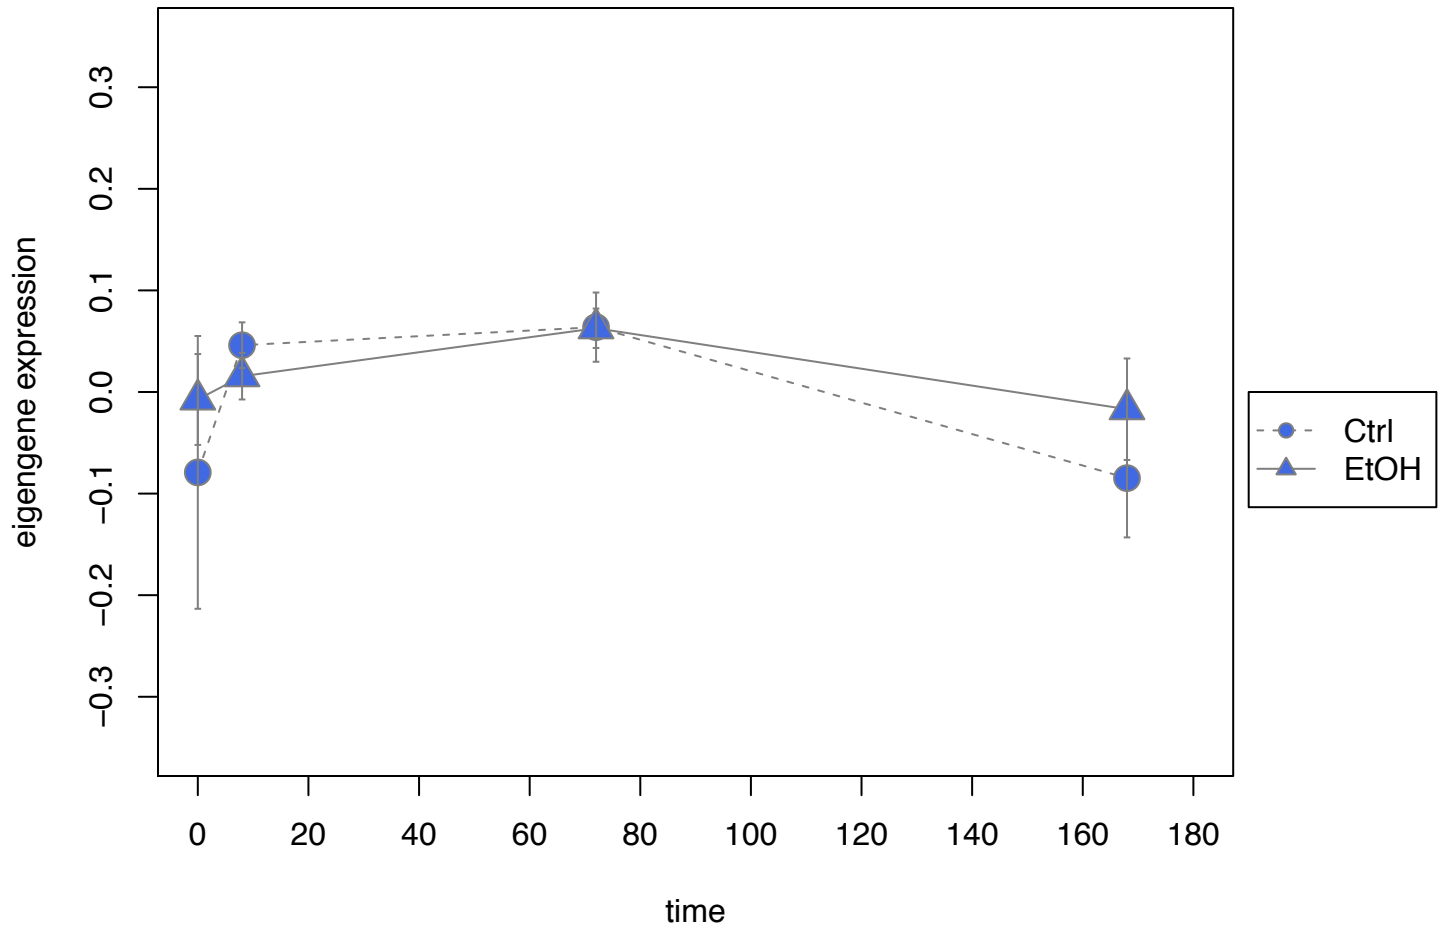

# HPC salmon

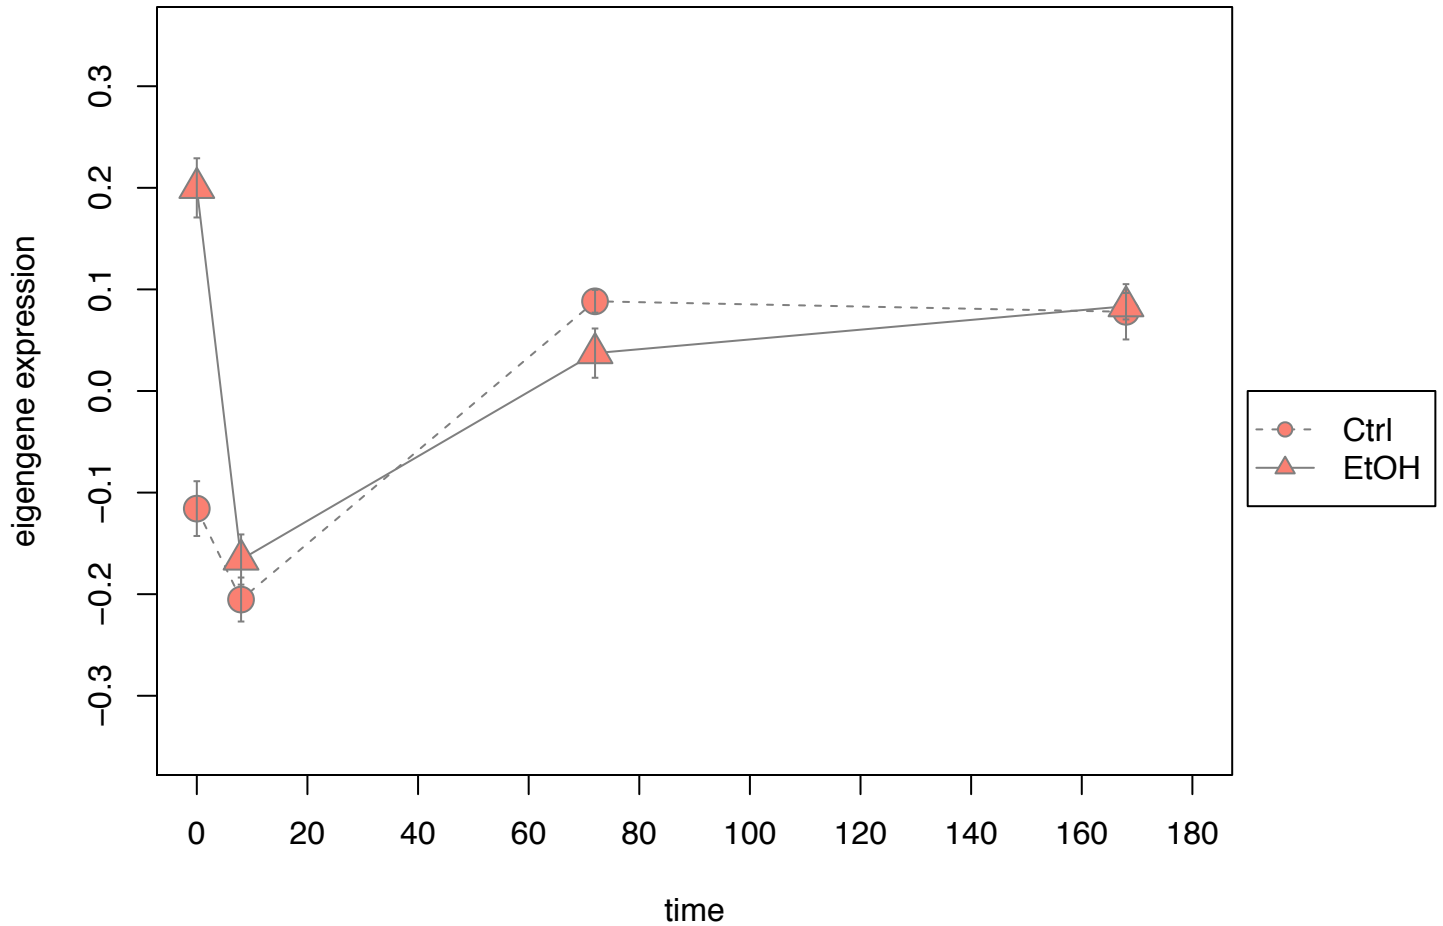

# HPC tan

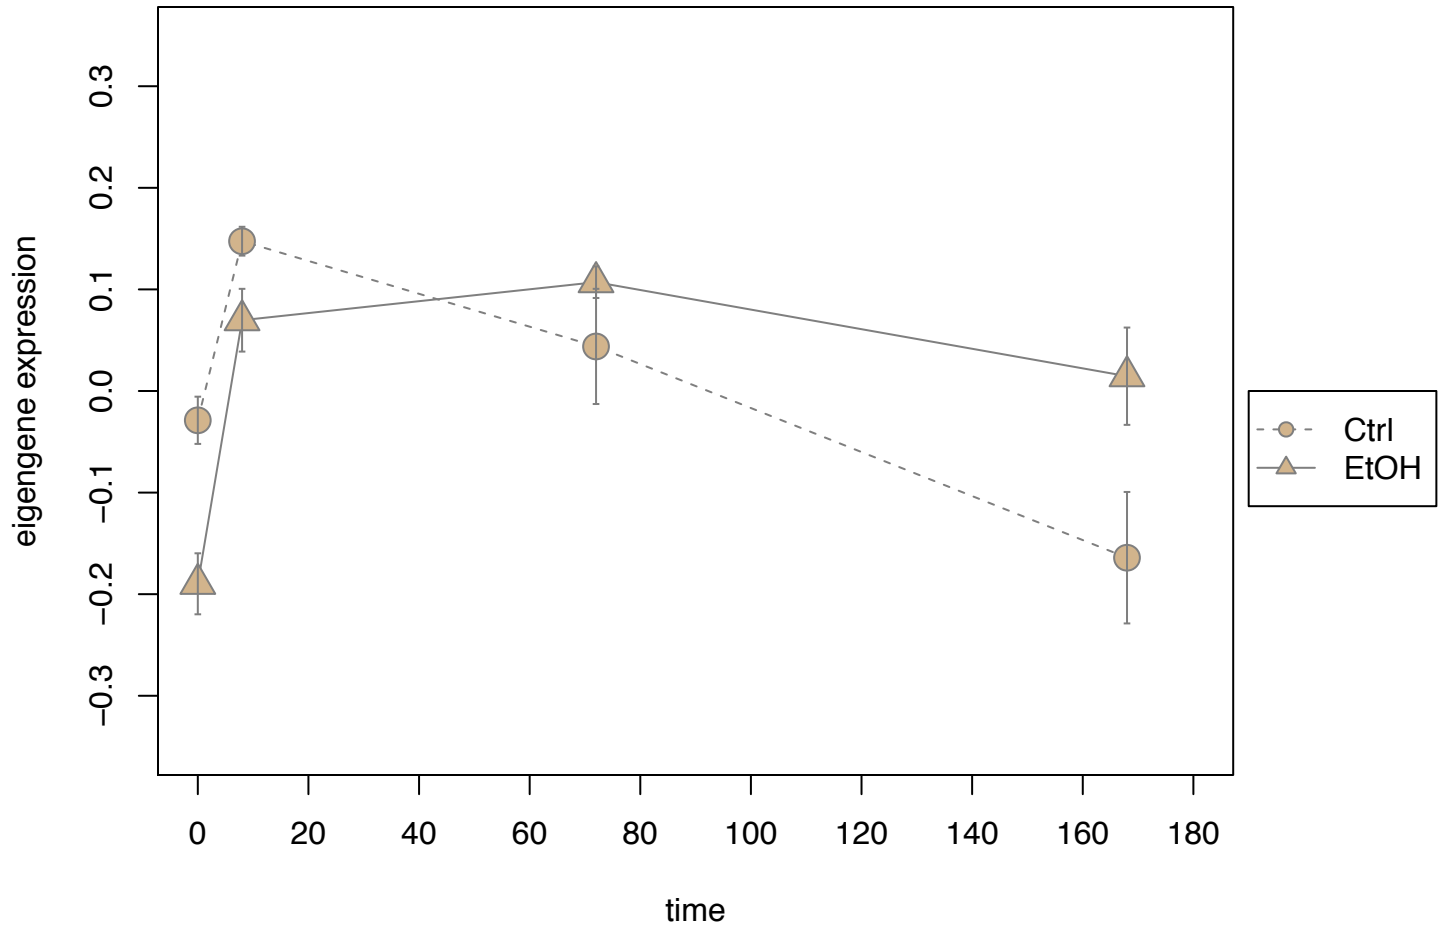

# HPC turquoise

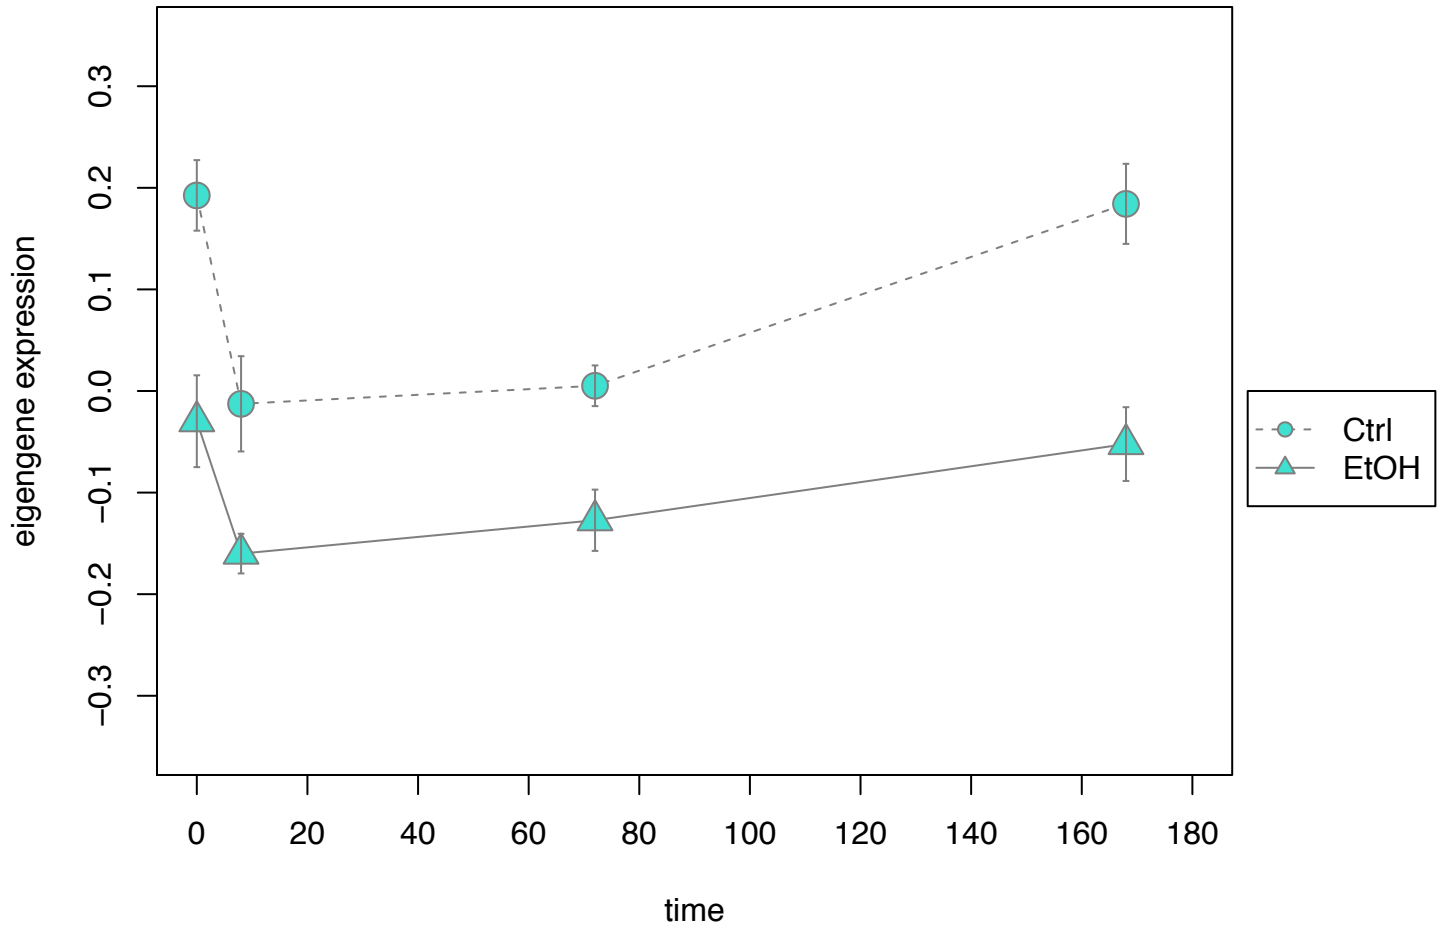

# HPC yellow

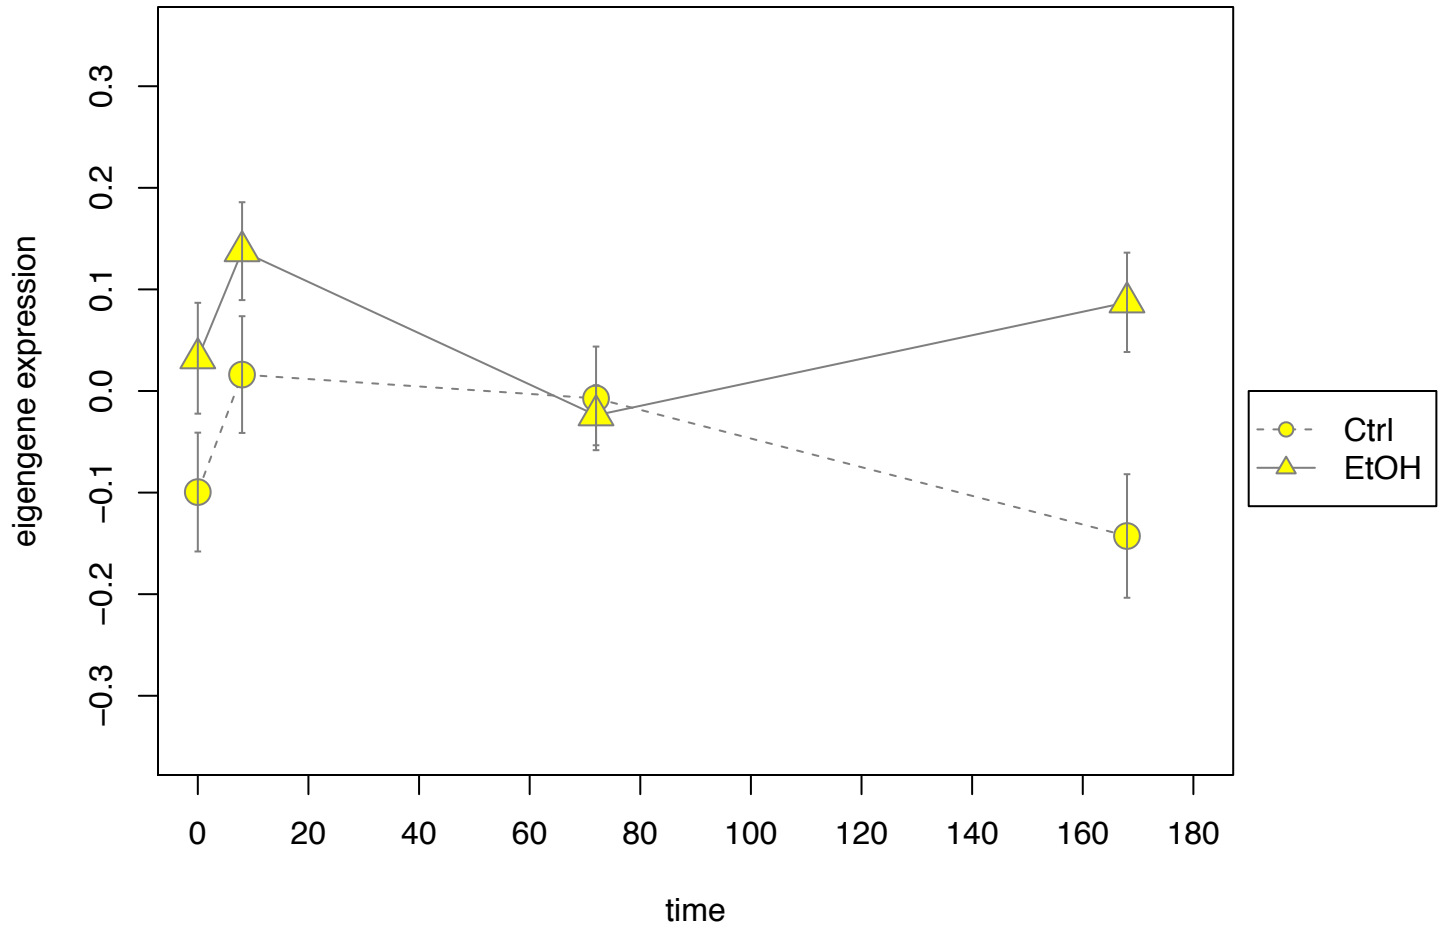

Supplement: pone.0146257.s003.pdf [file pone.0146257.s003.pdf]
