# Supplementary material for: Time-Course Analysis of Brain Regional Expression Network Responses to Chronic Intermittent Ethanol and Withdrawal: Implications for Mechanisms Underlying Excessive Ethanol Consumption
Source: PubMed Central journal article supplement (PMC4701666; doi:10.1371/journal.pone.0146257), 2016-01-05

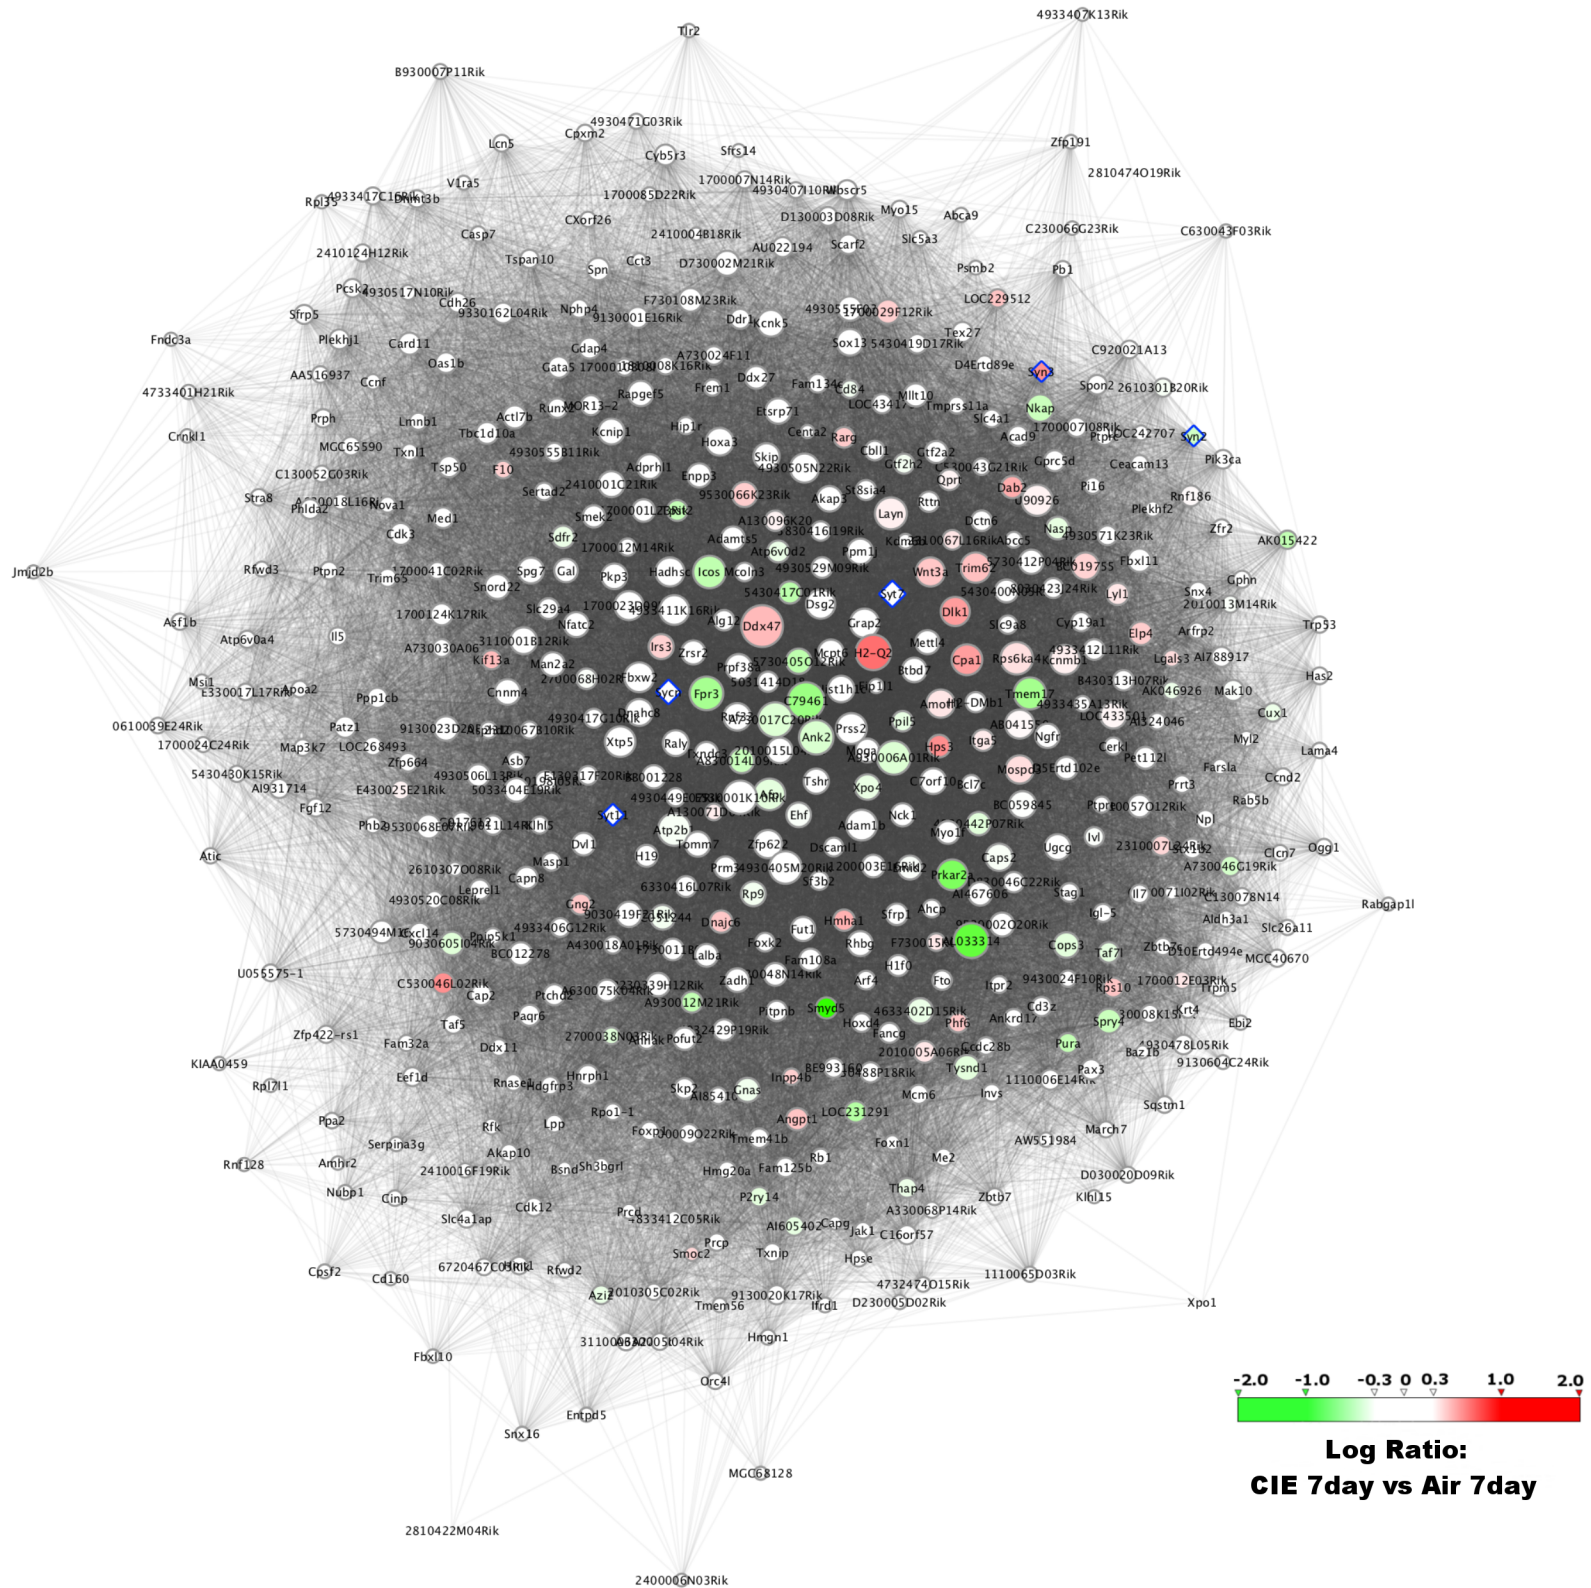

Supplement: pone.0146257.s006.pdf [file pone.0146257.s006.pdf]
