# Supplementary material for: Time-Course Analysis of Brain Regional Expression Network Responses to Chronic Intermittent Ethanol and Withdrawal: Implications for Mechanisms Underlying Excessive Ethanol Consumption
Source: PLoS One. 2016 Jan 5;11(1):e0146257. doi: 10.1371/journal.pone.0146257 (PMC4701666; doi:10.1371/journal.pone.0146257)
Supplement: S12 Table — (XLSX) [file pone.0146257.s022.xlsx]

## Sheet: Yellow
Category	Term	Count	%	PValue	Genes	List Total	Pop Hits	Pop Total	Fold Enrichment	Bonferroni	Benjamini	FDR
SP_PIR_KEYWORDS	phosphoprotein	273	43.75	8.19222e-13	ALS2, PTGS2, CHMP5, PDLIM5, PPP2R5C, PTPN20, GPCPD1, ZNRF2, HOOK1, PGR, ATP2B1, AGPS, VPS13C, PRRT3, NT5C2, INTS6, FAM53C, GNG2, VPS13A, CHRNA7, TLK2, FAM53B, TPSB2, RAPGEF2, 1700025G04RIK, FAM40A, MAP2K5, DEPDC7, RCOR3, PTPRG, CRYAB, PIK3CD, AARS, MECP2, UBR4, MYLK2, HMG20A, OPTN, TXNDC9, CCR5, RFC1, JUN, ADSL, NEK9, PPP2R5E, NEK7, RAD23B, FIP1L1, CCDC93, RER1, CACNB2, CAPZB, KCNJ3, SLC11A2, PVR…	545	6311	17854	1.41711	2.73624e-10	2.73624e-10	1.11265e-09
SP_PIR_KEYWORDS	alternative splicing	197	31.5705	5.8092e-09	ALS2, PDLIM5, PPP2R5C, PTPN20, SIDT1, MYLIP, 1110028C15RIK, GPCPD1, MED20, HOOK1, SH3YL1, VPS13C, INTS6, VPS13A, FAM53B, TLK2, TPSB2, CYHR1, FAM40A, MAP2K5, MATN4, RCOR3, UBR4, MECP2, OLA1, HMG20A, PARP11, 2410002O22RIK, LPCAT2, SSTR2, RFC1, RFESD, CHKA, FIP1L1, CACNB2, DAAM1, RIC3, CAPZB, SLC11A2, PVRL4, TRP53BP1, BCOR, CNKSR2, TRPC4, PTGR2, ABR, SMYD4, TRIO, HOMER1, METTL13, SMURF2, GRIP1, VPS3…	545	4481	17854	1.44022	1.94027e-06	9.70135e-07	7.88983e-06
UP_SEQ_FEATURE	splice variant	197	31.5705	3.01077e-06	ALS2, PDLIM5, PPP2R5C, PTPN20, SIDT1, MYLIP, 1110028C15RIK, GPCPD1, MED20, HOOK1, SH3YL1, VPS13C, INTS6, VPS13A, FAM53B, TLK2, TPSB2, CYHR1, FAM40A, MAP2K5, MATN4, RCOR3, UBR4, MECP2, OLA1, HMG20A, PARP11, 2410002O22RIK, LPCAT2, SSTR2, RFC1, RFESD, CHKA, FIP1L1, CACNB2, DAAM1, RIC3, CAPZB, SLC11A2, PVRL4, TRP53BP1, BCOR, CNKSR2, TRPC4, PTGR2, ABR, SMYD4, TRIO, HOMER1, METTL13, SMURF2, GRIP1, VPS3…	535	4448	16021	1.32629	0.00438608	0.00438608	0.00498603
GOTERM_CC_FAT	GO:0014069~postsynaptic density	10	1.60256	1.63357e-05	ALS2, DLGAP1, GRIA2, GRIA1, DLG4, NCS1, GRIA3, CHRNA7, HOMER1, GRM1	372	51	12504	6.59077	0.00523009	0.00523009	0.0220523
GOTERM_CC_FAT	GO:0045202~synapse	25	4.00641	2.8238e-05	ALS2, GRIP1, GABRB1, UTRN, NCS1, ABI1, ZNRF2, NRCAM, SYN2, SNPH, DLG4, CHRNA7, LGI1, D230025D16RIK, GABRA2, DLGAP1, GRIA3, HOMER1, GRM1, LIN7A, HDAC4, GRIA2, SEMA4F, GRIA1, ERC2	372	319	12504	2.63424	0.00902356	0.00452201	0.0381169
GOTERM_BP_FAT	GO:0007268~synaptic transmission	17	2.72436	7.57338e-05	MYO5A, ALS2, DLGAP1, EGR3, AGTPBP1, STX4A, MECP2, MYLK2, CACNB2, LIN7A, KIF1B, PSEN1, GRIA2, TRIM9, SYN2, CHRNA7, PPP3CA	402	178	13588	3.22818	0.137233	0.137233	0.129739
GOTERM_CC_FAT	GO:0045211~postsynaptic membrane	14	2.24359	9.23916e-05	DLGAP1, GABRA2, GRIP1, GABRB1, NCS1, GRIA3, HOMER1, GRM1, LIN7A, GRIA2, GRIA1, SEMA4F, DLG4, CHRNA7	372	126	12504	3.73477	0.0292236	0.00983765	0.124664
SP_PIR_KEYWORDS	cytoplasm	127	20.3526	0.000103645	THRA, IL16, CHMP5, UBQLN4, MYLIP, PTPN20, FLCN, SETX, PGR, HOOK1, PACSIN3, NT5C2, FGFR1OP2, PDRG1, CYHR1, TRFR2, MAP2K5, CASKIN1, TUB, BAIAP2, AARS, UBR4, SOCS7, MYLK2, OPTN, ACTL7B, GM12669, NEK9, PPP2R5E, ERC2, TNFAIP3, KALRN, MPST, NEK7, ARFGAP2, TRAF2, RAD23B, CHKA, MCL1, NTAN1, HSPA1A, ENSA, HSPA1B, DAAM1, CAPZB, DOCK1, OTUD7A, TRAF5, CNKSR2, PTPN6, GPD1, PTGR2, PTPN2, UBE2CBP, SMEK2, TRIO, …	545	3029	17854	1.37355	0.0340269	0.0114734	0.140675
GOTERM_BP_FAT	GO:0019226~transmission of nerve impulse	19	3.04487	0.000131798	MYO5A, ALS2, DLGAP1, EGR3, AGTPBP1, STX4A, MECP2, MYLK2, CACNB2, LIN7A, NRCAM, CD9, KIF1B, GRIA2, PSEN1, TRIM9, SYN2, CHRNA7, PPP3CA	402	226	13588	2.84168	0.226548	0.120539	0.22568
GOTERM_BP_FAT	GO:0007242~intracellular signaling cascade	48	7.69231	0.000138003	ADCY3, ALS2, NRG3, ASB12, FGF13, BRSK1, PGR, DIRAS1, DAB1, DGKG, PRRT1, TAAR1, TLK2, RAB26, RAPGEF2, MAP2K5, CNKSR2, DEPDC7, PTPN6, ABR, BRCC3, SOCS2, RAB39B, BAIAP2, PIK3CD, TRIO, SOCS7, MAPK11, RGNEF, GRM1, ATM, SRPK1, DAPK1, RASL11B, RERG, SH3BP5, SSTR2, RASL11A, ADCY9, PSEN1, ARF3, WSB2, FBXO31, ADRA1A, JAK1, CACNA1D, RASD1, SLC9A1	402	915	13588	1.77317	0.235846	0.08576	0.236292
GOTERM_CC_FAT	GO:0044456~synapse part	18	2.88462	0.000195268	ALS2, DLGAP1, GABRA2, GRIP1, GABRB1, NCS1, GRIA3, HOMER1, GRM1, LIN7A, GRIA2, GRIA1, SEMA4F, SYN2, DLG4, CHRNA7, ERC2, D230025D16RIK	372	212	12504	2.85393	0.0607627	0.0155496	0.263306
SP_PIR_KEYWORDS	synapse	18	2.88462	0.000293644	DLGAP1, GABRA2, GRIP1, GABRB1, NCS1, ABI1, GRIA3, HOMER1, LIN7A, ZNRF2, GRIA2, GRIA1, SNPH, SYN2, DLG4, CHRNA7, ERC2, LGI1	545	213	17854	2.76842	0.093434	0.0242246	0.39808
GOTERM_CC_FAT	GO:0043005~neuron projection	19	3.04487	0.000375881	ALS2, TNFRSF21, PRPH, KCND3, UTRN, NCS1, ABI1, GRIA3, GRM1, CAPRIN1, NRCAM, GRIA2, PSEN1, PXMP3, CHRNA7, NRSN1, ERC2, D230025D16RIK, CHL1	372	245	12504	2.60671	0.113683	0.0238472	0.50628
GOTERM_BP_FAT	GO:0007267~cell-cell signaling	21	3.36538	0.000391701	MYO5A, ALS2, DLGAP1, TRPC4, EGR3, AGTPBP1, FGF9, STX4A, MECP2, MYLK2, CACNB2, GREM1, LIN7A, BDNF, KIF1B, GRIA2, PSEN1, TRIM9, SYN2, CHRNA7, PPP3CA	402	290	13588	2.44766	0.534003	0.17378	0.66931
SP_PIR_KEYWORDS	acetylation	99	15.8654	0.00045266	ALS2, PRPF4B, PDLIM5, DTYMK, UBQLN4, 1110028C15RIK, SETX, HOOK1, CSNK2A2, VPS13C, AGPS, FGFR1OP2, GNG2, FNDC3A, FAM40A, SNRPN, CRYAB, AARS, NUDT5, MECP2, UBR4, OLA1, RFC1, GM12669, NEK9, ADSL, NEK7, RAD23B, TRAF2, FIP1L1, ENSA, RIC3, CAPZB, HADHB, HNRNPF, NUP50, ISY1, BCOR, GPD2, PTPN6, PTPN2, SUB1, 1200011I18RIK, AK3, PRPSAP1, ABCB7, ATM, TBC1D24, CORO1A, NIPSNAP1, CPNE3, HIST1H3D, XPO7, GLYR1, …	545	2325	17854	1.39493	0.140344	0.0297917	0.613038
GOTERM_BP_FAT	GO:0031644~regulation of neurological system process	12	1.92308	0.000504574	GRM5, BDNF, GRIA2, PSEN1, MECP2, DLG4, NCS1, ADRA1A, CHRNA7, PPP3CA, LGI1, GRM1	402	113	13588	3.58949	0.626061	0.17859	0.861395
SP_PIR_KEYWORDS	postsynaptic cell membrane	12	1.92308	0.000532042	DLGAP1, GABRA2, GRIA2, GRIA1, GRIP1, GABRB1, DLG4, NCS1, GRIA3, CHRNA7, HOMER1, LIN7A	545	110	17854	3.57378	0.162848	0.0291904	0.720185
GOTERM_CC_FAT	GO:0030426~growth cone	8	1.28205	0.000718755	ALS2, GRIA2, PSEN1, UTRN, CHRNA7, ABI1, ERC2, NRSN1	372	51	12504	5.27261	0.206104	0.0377367	0.966031
GOTERM_CC_FAT	GO:0030427~site of polarized growth	8	1.28205	0.000718755	ALS2, GRIA2, PSEN1, UTRN, CHRNA7, ABI1, ERC2, NRSN1	372	51	12504	5.27261	0.206104	0.0377367	0.966031
GOTERM_BP_FAT	GO:0050804~regulation of synaptic transmission	11	1.76282	0.000728363	GRM5, BDNF, GRIA2, PSEN1, MECP2, DLG4, NCS1, ADRA1A, CHRNA7, PPP3CA, LGI1	402	100	13588	3.71811	0.75831	0.210758	1.2412
GOTERM_BP_FAT	GO:0048812~neuron projection morphogenesis	15	2.40385	0.000731143	ALS2, NTNG1, CELSR3, RGNEF, NRN1, SLIT2, SLIT3, SLC11A2, NRCAM, SLITRK2, BDNF, SEMA4F, FOXG1, CHL1, DSCAM	402	176	13588	2.88077	0.759616	0.184248	1.24591
SP_PIR_KEYWORDS	ubl conjugation	31	4.96795	0.000742367	MKRN1, TRAF2, THRA, MCL1, TSG101, ELK1, MYLIP, RIC3, PGR, HTR1A, ZNF512B, VPS13C, HNRNPF, RNF128, PIK3R1, GPR158, HIST1H2BE, HIST1H1C, UBE2CBP, KLF10, TMBIM6, MBD1, HDAC4, SP1, INVS, DIO2, UBE2K, ASH1L, VPS24, HIST1H3D, SMURF2	545	524	17854	1.93807	0.219673	0.0348142	1.00356
GOTERM_BP_FAT	GO:0031175~neuron projection development	17	2.72436	0.00075769	ALS2, NTNG1, MECP2, CELSR3, RGNEF, NRN1, PTEN, SLIT2, SLIT3, SLITRK2, SLC11A2, NRCAM, BDNF, SEMA4F, FOXG1, CHL1, DSCAM	402	218	13588	2.63586	0.771746	0.168615	1.29087
GOTERM_CC_FAT	GO:0005626~insoluble fraction	30	4.80769	0.00105423	PPFIA2, ALS2, JPH3, PTGS2, ABI1, DYNLL1, TRIM9, SNPH, DLG4, CHRNA7, PPP3CA, D230025D16RIK, ACSL4, FNDC3A, CRYAB, GUSB, GRIA3, HOMER1, GRM1, LIN7A, SSTR2, ZFP106, GRIA2, PSEN1, GRIA1, SEMA4F, ADRA1A, ERC2, VLDLR, SLC9A1	372	528	12504	1.90982	0.287223	0.0472184	1.41396
GOTERM_BP_FAT	GO:0051969~regulation of transmission of nerve impulse	11	1.76282	0.00123233	GRM5, BDNF, GRIA2, PSEN1, MECP2, DLG4, NCS1, ADRA1A, CHRNA7, PPP3CA, LGI1	402	107	13588	3.47487	0.90958	0.234351	2.0915
GOTERM_CC_FAT	GO:0005624~membrane fraction	29	4.64744	0.00128944	PPFIA2, ALS2, JPH3, PTGS2, ABI1, DYNLL1, TRIM9, SNPH, DLG4, CHRNA7, PPP3CA, D230025D16RIK, ACSL4, FNDC3A, GUSB, GRIA3, HOMER1, GRM1, LIN7A, SSTR2, ZFP106, GRIA2, PSEN1, GRIA1, SEMA4F, ADRA1A, ERC2, VLDLR, SLC9A1	372	510	12504	1.91132	0.339117	0.0504549	1.72689
KEGG_PATHWAY	mmu04010:MAPK signaling pathway	19	3.04487	0.00133573	TRAF2, CACNA2D1, FGF9, PPP3R1, CACNB2, ELK1, HSPA1A, FGF13, MAPK11, HSPA1B, ACVR1B, DUSP4, BDNF, JUN, PPP3CB, PPP3CA, RAPGEF2, CACNA1D, AKT3, MAP2K5	179	265	5738	2.29835	0.163983	0.163983	1.55277
KEGG_PATHWAY	mmu04210:Apoptosis	10	1.60256	0.00138807	TRAF2, PIK3CD, IL1RAP, PPP3CB, PPP3R1, PPP3CA, PIK3R1, ATM, AKT3, TRADD	179	87	5738	3.68458	0.169835	0.0888659	1.61317
GOTERM_CC_FAT	GO:0030425~dendrite	11	1.76282	0.00157604	ALS2, GRIA2, PSEN1, PXMP3, NCS1, GRIA3, CHRNA7, D230025D16RIK, GRM1, CHL1, CAPRIN1	372	110	12504	3.36129	0.397282	0.0547032	2.10694
GOTERM_BP_FAT	GO:0051129~negative regulation of cellular component organization	10	1.60256	0.00167543	PSEN1, PACSIN3, SEMA4F, GSN, SNPH, MECP2, TMSB15B1, CAPZB, PTEN, ATM, TMSB15B2	402	93	13588	3.63452	0.961923	0.278783	2.83341
GOTERM_CC_FAT	GO:0000267~cell fraction	32	5.12821	0.00172163	PPFIA2, ALS2, JPH3, PTGS2, ABI1, DYNLL1, TRIM9, SNPH, DLG4, CHRNA7, PPP3CA, D230025D16RIK, ACSL4, FNDC3A, GPD1, CRYAB, GUSB, GRIA3, HOMER1, GRM1, LIN7A, ZFP106, SSTR2, GRIA2, PSEN1, GRIA1, SEMA4F, ADRA1A, ERC2, RASD1, SLC9A1, VLDLR	372	596	12504	1.80472	0.424848	0.0538101	2.2995
KEGG_PATHWAY	mmu05014:Amyotrophic lateral sclerosis (ALS)	8	1.28205	0.00175197	ALS2, PRPH, GRIA2, GRIA1, PPP3CB, PPP3R1, MAPK11, PPP3CA	179	57	5738	4.49907	0.209405	0.0753346	2.03213
SP_PIR_KEYWORDS	ubl conjugation pathway	28	4.48718	0.00195344	MKRN1, ZFAND5, RAD23B, UBE2G2, ASB12, MYLIP, UBE3C, FEM1B, ZNRF2, FBXW7, RNF128, HECTD2, OTUD7A, FBXO3, USP34, USP16, FBXL17, BRCC3, SOCS2, UBE2CBP, UBR4, SOCS7, UBE2K, WSB2, FBXO30, FBXO31, SMURF2, TNFAIP3	545	484	17854	1.89519	0.479564	0.0783926	2.62073
GOTERM_BP_FAT	GO:0007626~locomotory behavior	17	2.72436	0.00198149	MYO5A, ALS2, IL16, CCL21C, MECP2, CCL21A, CCL21B, NTAN1, GM13304, GRM1, LOC100041593, SLIT2, GRM5, NPAS2, CORO1A, GM10591, MCOLN3, DLG4, VPS13A, GM1987, CHL1, DSCAM	402	239	13588	2.40425	0.979053	0.29632	3.34276
GOTERM_BP_FAT	GO:0007610~behavior	24	3.84615	0.00211116	MYO5A, ALS2, IL16, NTAN1, SLC11A2, BDNF, NPAS2, MCOLN3, DLG4, CHRNA7, VPS13A, DSCAM, CCL21C, CCL21A, MECP2, CCL21B, GM13304, DDO, GRM1, SLIT2, LOC100041593, GRM5, CORO1A, PSEN1, GM10591, GRIA1, NEUROD2, GM1987, CHL1	402	405	13588	2.00302	0.983739	0.290539	3.5578
GOTERM_BP_FAT	GO:0030163~protein catabolic process	30	4.80769	0.00216762	MKRN1, TRAF2, RAD23B, UBE2G2, PPP2R5C, ASB12, UBE3C, MYLIP, FEM1B, ZNRF2, FBXW7, RNF128, HECTD2, OTUD7A, FBXO3, USP34, USP16, FBXL17, BRCC3, SOCS2, UBE2CBP, UBR4, SOCS7, PSEN1, UBE2K, WSB2, FBXO30, FBXO31, SMURF2, TNFAIP3	402	556	13588	1.82379	0.985437	0.27771	3.65129
SP_PIR_KEYWORDS	isopeptide bond	19	3.04487	0.00218632	GPR158, THRA, HIST1H1C, MCL1, HIST1H2BE, TMBIM6, ELK1, RIC3, MBD1, PGR, HDAC4, HTR1A, VPS13C, SP1, UBE2K, HNRNPF, ASH1L, VPS24, HIST1H3D	545	277	17854	2.24705	0.518587	0.0780142	2.92887
GOTERM_BP_FAT	GO:0019941~modification-dependent protein catabolic process	28	4.48718	0.00234034	MKRN1, RAD23B, UBE2G2, PPP2R5C, ASB12, UBE3C, MYLIP, FEM1B, ZNRF2, FBXW7, RNF128, HECTD2, OTUD7A, FBXO3, USP34, USP16, FBXL17, BRCC3, SOCS2, UBE2CBP, UBR4, SOCS7, UBE2K, WSB2, FBXO30, FBXO31, SMURF2, TNFAIP3	402	508	13588	1.86305	0.989608	0.278333	3.93678
GOTERM_BP_FAT	GO:0043632~modification-dependent macromolecule catabolic process	28	4.48718	0.00234034	MKRN1, RAD23B, UBE2G2, PPP2R5C, ASB12, UBE3C, MYLIP, FEM1B, ZNRF2, FBXW7, RNF128, HECTD2, OTUD7A, FBXO3, USP34, USP16, FBXL17, BRCC3, SOCS2, UBE2CBP, UBR4, SOCS7, UBE2K, WSB2, FBXO30, FBXO31, SMURF2, TNFAIP3	402	508	13588	1.86305	0.989608	0.278333	3.93678
GOTERM_BP_FAT	GO:0051603~proteolysis involved in cellular protein catabolic process	29	4.64744	0.00238978	MKRN1, RAD23B, UBE2G2, PPP2R5C, ASB12, UBE3C, MYLIP, FEM1B, ZNRF2, FBXW7, RNF128, HECTD2, OTUD7A, FBXO3, USP34, USP16, FBXL17, BRCC3, SOCS2, UBE2CBP, UBR4, SOCS7, PSEN1, UBE2K, WSB2, FBXO30, FBXO31, SMURF2, TNFAIP3	402	534	13588	1.83563	0.990564	0.267201	4.01834
GOTERM_BP_FAT	GO:0044257~cellular protein catabolic process	29	4.64744	0.00256868	MKRN1, RAD23B, UBE2G2, PPP2R5C, ASB12, UBE3C, MYLIP, FEM1B, ZNRF2, FBXW7, RNF128, HECTD2, OTUD7A, FBXO3, USP34, USP16, FBXL17, BRCC3, SOCS2, UBE2CBP, UBR4, SOCS7, PSEN1, UBE2K, WSB2, FBXO30, FBXO31, SMURF2, TNFAIP3	402	537	13588	1.82538	0.993348	0.268969	4.31295
GOTERM_BP_FAT	GO:0048666~neuron development	19	3.04487	0.00265438	ALS2, NTNG1, MECP2, CELSR3, RGNEF, NRN1, PTEN, SLIT2, SLIT3, SLITRK2, SLC11A2, NRCAM, BDNF, PSEN1, SEMA4F, FOXG1, NEUROD2, CHL1, DSCAM	402	292	13588	2.19938	0.994373	0.262671	4.45378
GOTERM_BP_FAT	GO:0048858~cell projection morphogenesis	15	2.40385	0.00270735	ALS2, NTNG1, CELSR3, RGNEF, NRN1, SLIT2, SLIT3, SLC11A2, NRCAM, SLITRK2, BDNF, SEMA4F, FOXG1, CHL1, DSCAM	402	202	13588	2.50997	0.994927	0.254383	4.54073
GOTERM_MF_FAT	GO:0030554~adenyl nucleotide binding	63	10.0962	0.00279918	ADCY3, D2HGDH, PRPF4B, UBE2G2, PRKAG2, DTYMK, QARS, SETX, ATP2B1, CSNK2A2, ACVR1B, ACTR2, AGPS, ATP8B2, TLK2, AKT3, KIF2A, MAP2K5, PIK3CD, AARS, OLA1, MYLK2, ZFR2, SRPK1, COQ6, DAPK1, DDR1, KIF1B, RFC1, UBE2K, NEK9, KALRN, NEK7, MYO5A, CHKA, ALDH18A1, HSPA1A, HSPA1B, ABCA1, BRSK1, ZNF512B, DGKG, SYN2, SRR, UCK2, ACSL4, ERCC6L, RTCD1, SMC5, AK3, TRIO, TREX1, MAPK11, AK5, ABCB7, DDX4, SMC2, ATM, AB…	380	1535	13288	1.43519	0.817588	0.817588	4.06175
GOTERM_BP_FAT	GO:0048667~cell morphogenesis involved in neuron differentiation	14	2.24359	0.00292595	NTNG1, CELSR3, RGNEF, NRN1, SLIT2, SLIT3, SLC11A2, NRCAM, SLITRK2, BDNF, SEMA4F, FOXG1, CHL1, DSCAM	402	182	13588	2.60008	0.996691	0.259612	4.89877
GOTERM_BP_FAT	GO:0016192~vesicle-mediated transport	26	4.16667	0.00297345	ALS2, MYO5A, ARFGAP2, NKD2, NAPG, CHMP5, STX4A, ABCA1, HOOK1, DOCK1, PACSIN3, TRIM9, GSN, SNPH, DLG4, SEC22B, CHRNA7, EXOC6, D230025D16RIK, LIN7A, PSEN1, GRIA2, GRIA1, ARF3, RIN1, VLDLR	402	466	13588	1.88589	0.996984	0.251882	4.9764
GOTERM_BP_FAT	GO:0030030~cell projection organization	20	3.20513	0.00300021	ALS2, BAIAP2, NTNG1, MECP2, CELSR3, RGNEF, NRN1, PTEN, CAPZB, SLIT2, SLIT3, SLITRK2, SLC11A2, NRCAM, BDNF, CORO1A, SEMA4F, FOXG1, CHL1, DSCAM	402	319	13588	2.11918	0.997138	0.24336	5.02011
GOTERM_CC_FAT	GO:0019717~synaptosome	8	1.28205	0.00330882	PPFIA2, SEMA4F, TRIM9, SNPH, DLG4, ABI1, ERC2, LIN7A	372	66	12504	4.07429	0.65489	0.0921875	4.37595
GOTERM_MF_FAT	GO:0001883~purine nucleoside binding	63	10.0962	0.00346736	ADCY3, D2HGDH, PRPF4B, UBE2G2, PRKAG2, DTYMK, QARS, SETX, ATP2B1, CSNK2A2, ACVR1B, ACTR2, AGPS, ATP8B2, TLK2, AKT3, KIF2A, MAP2K5, PIK3CD, AARS, OLA1, MYLK2, ZFR2, SRPK1, COQ6, DAPK1, DDR1, KIF1B, RFC1, UBE2K, NEK9, KALRN, NEK7, MYO5A, CHKA, ALDH18A1, HSPA1A, HSPA1B, ABCA1, BRSK1, ZNF512B, DGKG, SYN2, SRR, UCK2, ACSL4, ERCC6L, RTCD1, SMC5, AK3, TRIO, TREX1, MAPK11, AK5, ABCB7, DDX4, SMC2, ATM, AB…	380	1548	13288	1.42313	0.878561	0.651519	5.0083
GOTERM_BP_FAT	GO:0030182~neuron differentiation	23	3.6859	0.00378651	ALS2, AGTPBP1, NTNG1, MECP2, CELSR3, BRSK1, RGNEF, NRN1, PTEN, SLIT2, SLIT3, SLITRK2, SLC11A2, NRCAM, BDNF, PSEN1, MCOLN3, SEMA4F, FOXG1, NEUROD2, USH2A, CHL1, DSCAM	402	399	13588	1.94843	0.999385	0.285439	6.29598
GOTERM_MF_FAT	GO:0001882~nucleoside binding	63	10.0962	0.00394637	ADCY3, D2HGDH, PRPF4B, UBE2G2, PRKAG2, DTYMK, QARS, SETX, ATP2B1, CSNK2A2, ACVR1B, ACTR2, AGPS, ATP8B2, TLK2, AKT3, KIF2A, MAP2K5, PIK3CD, AARS, OLA1, MYLK2, ZFR2, SRPK1, COQ6, DAPK1, DDR1, KIF1B, RFC1, UBE2K, NEK9, KALRN, NEK7, MYO5A, CHKA, ALDH18A1, HSPA1A, HSPA1B, ABCA1, BRSK1, ZNF512B, DGKG, SYN2, SRR, UCK2, ACSL4, ERCC6L, RTCD1, SMC5, AK3, TRIO, TREX1, MAPK11, AK5, ABCB7, DDX4, SMC2, ATM, AB…	380	1558	13288	1.414	0.909299	0.550699	5.68151
GOTERM_BP_FAT	GO:0044265~cellular macromolecule catabolic process	31	4.96795	0.0042128	MKRN1, RAD23B, UBE2G2, PPP2R5C, ASB12, UBE3C, MYLIP, FEM1B, ZNRF2, AUH, FBXW7, RNF128, HECTD2, OTUD7A, FBXO3, USP34, USP16, FBXL17, BRCC3, SOCS2, UBE2CBP, UBR4, SOCS7, ATM, PSEN1, UBE2K, WSB2, FBXO30, FBXO31, SMURF2, TNFAIP3	402	609	13588	1.72058	0.999733	0.300748	6.98093
GOTERM_BP_FAT	GO:0032990~cell part morphogenesis	15	2.40385	0.00422064	ALS2, NTNG1, CELSR3, RGNEF, NRN1, SLIT2, SLIT3, SLC11A2, NRCAM, SLITRK2, BDNF, SEMA4F, FOXG1, CHL1, DSCAM	402	212	13588	2.39158	0.999737	0.2907	6.99348
GOTERM_BP_FAT	GO:0000904~cell morphogenesis involved in differentiation	15	2.40385	0.00422064	NTNG1, PPP3R1, CELSR3, RGNEF, NRN1, SLIT2, SLIT3, SLC11A2, NRCAM, SLITRK2, BDNF, SEMA4F, FOXG1, CHL1, DSCAM	402	212	13588	2.39158	0.999737	0.2907	6.99348
GOTERM_MF_FAT	GO:0017076~purine nucleotide binding	73	11.6987	0.00428277	ADCY3, D2HGDH, PRPF4B, UBE2G2, PRKAG2, DTYMK, ATL3, QARS, SETX, ATP2B1, CSNK2A2, ACVR1B, ACTR2, DIRAS1, AGPS, ATP8B2, RAB26, TLK2, AKT3, KIF2A, MAP2K5, RAB39B, PIK3CD, AARS, OLA1, MYLK2, ZFR2, SRPK1, COQ6, DAPK1, DDR1, KIF1B, RFC1, UBE2K, NEK9, RASD1, NEK7, KALRN, MYO5A, CHKA, ALDH18A1, HSPA1A, BRSK1, HSPA1B, ABCA1, ZNF512B, DGKG, SYN2, SRR, UCK2, ACSL4, ERCC6L, RTCD1, SMC5, AK3, TRIO, TREX1, MAP…	380	1871	13288	1.36435	0.926113	0.478635	6.15162
INTERPRO	IPR003961:Fibronectin, type III	14	2.24359	0.00454381	FLRT3, CRLF3, PTPRG, HCFC2, NRCAM, TRIM9, D130043K22RIK, LRFN5, FNDC3A, IFNGR2, CHL1, USH2A, KALRN, DSCAM	526	191	17763	2.47529	0.987714	0.987714	6.91314
INTERPRO	IPR001293:Zinc finger, TRAF-type	4	0.641026	0.00462736	TRAF2, FBXO30, CYHR1, TRAF5	526	12	17763	11.2567	0.988671	0.893563	7.03597
GOTERM_MF_FAT	GO:0047184~1-acylglycerophosphocholine O-acyltransferase activity	3	0.480769	0.00468626	MBOAT2, LPCAT2, LPCAT3	380	4	13288	26.2263	0.942228	0.434616	6.71262
GOTERM_BP_FAT	GO:0007611~learning or memory	9	1.44231	0.00471959	GRM5, SLC11A2, BDNF, PSEN1, GRIA1, MECP2, NEUROD2, NTAN1, CHRNA7	402	89	13588	3.41808	0.999901	0.308443	7.78908
GOTERM_CC_FAT	GO:0032281~alpha-amino-3-hydroxy-5-methyl-4-isoxazolepropionic acid selective glutamate receptor complex	3	0.480769	0.00506318	GRIA2, GRIA1, DLG4	372	4	12504	25.2097	0.803955	0.126969	6.62353
GOTERM_MF_FAT	GO:0032559~adenyl ribonucleotide binding	59	9.45513	0.00561734	ADCY3, PRPF4B, UBE2G2, PRKAG2, DTYMK, QARS, SETX, ATP2B1, CSNK2A2, ACVR1B, ACTR2, ATP8B2, TLK2, AKT3, KIF2A, MAP2K5, PIK3CD, AARS, MYLK2, OLA1, ZFR2, SRPK1, DAPK1, DDR1, KIF1B, RFC1, UBE2K, NEK9, KALRN, NEK7, MYO5A, CHKA, ALDH18A1, HSPA1A, HSPA1B, ABCA1, BRSK1, ZNF512B, DGKG, SYN2, SRR, UCK2, ACSL4, ERCC6L, RTCD1, SMC5, AK3, TRIO, MAPK11, AK5, ABCB7, DDX4, SMC2, ATM, ABCG2, ADCY9, JAK1, GYK, BMPR…	380	1460	13288	1.41311	0.967266	0.434412	7.99523
GOTERM_CC_FAT	GO:0005856~cytoskeleton	49	7.85256	0.00609458	ALS2, PRPH, UTRN, NCS1, PTPN20, MYLIP, KRTAP5-3, HOOK1, ACTR2, DYNLL1, GSN, MFAP1A, TMSB15B1, DLG4, CHRNA7, KIF2A, TMSB15B2, MAP2K5, UBR4, FBLIM1, GRM1, ARHGAP26, STOM, KIF1B, PSEN1, ACTL7B, RIN1, SGCE, ERC2, KALRN, MYO5A, SDCCAG8, UPP2, ABI1, CAPZB, STAU2, DLGAP1, SMEK2, GRIA3, HOMER1, ATM, MPRIP, TRADD, KRT73, HDAC4, CORO1A, GRIA2, INVS, GRIA1, JAK1	372	1122	12504	1.46794	0.859472	0.140109	7.92195
KEGG_PATHWAY	mmu04020:Calcium signaling pathway	14	2.24359	0.00612	ADCY3, PPP3R1, OXTR, MYLK2, GRM1, ATP2B1, GRM5, EDNRB, ADCY9, PPP3CB, ADRA1A, CHRNA7, PPP3CA, CACNA1D	179	191	5738	2.34964	0.560712	0.185882	6.93528
KEGG_PATHWAY	mmu04310:Wnt signaling pathway	12	1.92308	0.00630778	CSNK2A2, NKD2, PSEN1, JUN, PPP2R5C, PPP3CB, PPP3R1, FRAT2, PPP2R5E, PPP3CA, DAAM1, FZD6	179	149	5738	2.58168	0.571695	0.155984	7.14094
GOTERM_BP_FAT	GO:0009057~macromolecule catabolic process	32	5.12821	0.00635557	MKRN1, TRAF2, RAD23B, UBE2G2, PPP2R5C, ASB12, UBE3C, MYLIP, FEM1B, ZNRF2, AUH, FBXW7, RNF128, HECTD2, OTUD7A, FBXO3, USP34, USP16, FBXL17, BRCC3, SOCS2, UBE2CBP, UBR4, SOCS7, ATM, PSEN1, UBE2K, WSB2, FBXO30, FBXO31, SMURF2, TNFAIP3	402	654	13588	1.65387	0.999996	0.379943	10.353
GOTERM_MF_FAT	GO:0005524~ATP binding	58	9.29487	0.00671086	ADCY3, PRPF4B, UBE2G2, DTYMK, QARS, SETX, ATP2B1, CSNK2A2, ACVR1B, ACTR2, ATP8B2, TLK2, AKT3, KIF2A, MAP2K5, PIK3CD, AARS, MYLK2, OLA1, ZFR2, SRPK1, DAPK1, DDR1, KIF1B, RFC1, UBE2K, NEK9, KALRN, NEK7, MYO5A, CHKA, ALDH18A1, HSPA1A, HSPA1B, ABCA1, BRSK1, ZNF512B, DGKG, SYN2, SRR, UCK2, ACSL4, ERCC6L, RTCD1, SMC5, AK3, TRIO, MAPK11, AK5, ABCB7, DDX4, SMC2, ATM, ABCG2, ADCY9, JAK1, GYK, BMPR1A, TRIT1	380	1443	13288	1.40552	0.983214	0.442275	9.48062
INTERPRO	IPR001251:Cellular retinaldehyde-binding/triple function, C-terminal	5	0.801282	0.00672759	TRIO, CLVS1, ARHGAP8, SEC14L1, KALRN	526	26	17763	6.49422	0.998528	0.886233	10.074
GOTERM_BP_FAT	GO:0044057~regulation of system process	14	2.24359	0.00679252	THRA, NCS1, MECP2, GRM1, GRM5, HDAC4, BDNF, PSEN1, GRIA2, DLG4, ADRA1A, CHRNA7, PPP3CA, LGI1	402	201	13588	2.3543	0.999998	0.388593	11.0264
GOTERM_CC_FAT	GO:0043198~dendritic shaft	4	0.641026	0.00739258	GRIA2, PSEN1, GRIA3, CHRNA7	372	14	12504	9.60369	0.907619	0.156446	9.53224
GOTERM_MF_FAT	GO:0032555~purine ribonucleotide binding	69	11.0577	0.00816012	ADCY3, PRPF4B, UBE2G2, PRKAG2, DTYMK, ATL3, QARS, SETX, ATP2B1, CSNK2A2, ACVR1B, ACTR2, DIRAS1, ATP8B2, RAB26, TLK2, AKT3, KIF2A, MAP2K5, RAB39B, PIK3CD, AARS, OLA1, MYLK2, ZFR2, SRPK1, DAPK1, DDR1, KIF1B, RFC1, UBE2K, NEK9, RASD1, NEK7, KALRN, MYO5A, CHKA, ALDH18A1, HSPA1A, BRSK1, HSPA1B, ABCA1, ZNF512B, DGKG, SYN2, SRR, UCK2, ACSL4, ERCC6L, RTCD1, SMC5, AK3, TRIO, MAPK11, AK5, ABCB7, DDX4, SMC2…	380	1796	13288	1.34344	0.993081	0.462963	11.4148
GOTERM_MF_FAT	GO:0032553~ribonucleotide binding	69	11.0577	0.00816012	ADCY3, PRPF4B, UBE2G2, PRKAG2, DTYMK, ATL3, QARS, SETX, ATP2B1, CSNK2A2, ACVR1B, ACTR2, DIRAS1, ATP8B2, RAB26, TLK2, AKT3, KIF2A, MAP2K5, RAB39B, PIK3CD, AARS, OLA1, MYLK2, ZFR2, SRPK1, DAPK1, DDR1, KIF1B, RFC1, UBE2K, NEK9, RASD1, NEK7, KALRN, MYO5A, CHKA, ALDH18A1, HSPA1A, BRSK1, HSPA1B, ABCA1, ZNF512B, DGKG, SYN2, SRR, UCK2, ACSL4, ERCC6L, RTCD1, SMC5, AK3, TRIO, MAPK11, AK5, ABCB7, DDX4, SMC2…	380	1796	13288	1.34344	0.993081	0.462963	11.4148
GOTERM_BP_FAT	GO:0001919~regulation of receptor recycling	3	0.480769	0.00818892	GRIA2, CHMP5, GRIA3	402	5	13588	20.2806	1	0.435804	13.1465
SP_PIR_KEYWORDS	membrane	195	31.25	0.00823047	HCCS, ADCY3, CALHM2, PTGS2, CHMP5, EFNA3, SIDT1, ZNRF2, ATP2B1, DIRAS1, HTR1A, PRRT3, PRRT1, CHRNA7, GNG2, RAB26, RAPGEF2, PTPRG, UBR4, LPCAT2, LPCAT3, SSTR2, CCR5, MLEC, MMD, RER1, CACNB2, RIC3, NRN1, KCNJ3, SLC11A2, PVRL4, NUP50, GPD2, CNKSR2, TRPC4, GPR158, CELSR3, HOMER1, GPR151, SYNGR4, ABCG2, SMURF2, SLC9A1, JPH3, SLC20A1, GRIP1, TSG101, VPS37A, CRCP, GPR88, ST6GALNAC6, EDNRB, DNAJC16, SLC2…	545	5507	17854	1.16	0.93673	0.241214	10.6175
GOTERM_CC_FAT	GO:0032279~asymmetric synapse	3	0.480769	0.00827341	GRIA2, GRIA3, CHRNA7	372	5	12504	20.1677	0.930527	0.16288	10.6101
GOTERM_BP_FAT	GO:0019751~polyol metabolic process	6	0.961538	0.00836037	GPD2, GPD1, MECP2, GYK, GPCPD1, PTEN	402	43	13588	4.71642	1	0.431206	13.4035
KEGG_PATHWAY	mmu04370:VEGF signaling pathway	8	1.28205	0.00885478	PTGS2, PIK3CD, PPP3CB, PPP3R1, MAPK11, PPP3CA, PIK3R1, AKT3	179	76	5738	3.3743	0.696334	0.180153	9.88975
GOTERM_BP_FAT	GO:0007409~axonogenesis	12	1.92308	0.00902316	SLITRK2, NRCAM, BDNF, SEMA4F, FOXG1, NTNG1, CELSR3, RGNEF, NRN1, CHL1, SLIT2, SLIT3	402	163	13588	2.48842	1	0.445043	14.3903
GOTERM_CC_FAT	GO:0005886~plasma membrane	107	17.1474	0.00911532	ADCY3, GABRB1, UTRN, EFNA3, VIPR1, ZNRF2, ATP2B1, NRCAM, DIRAS1, HTR1A, PACSIN3, MCOLN3, PRRT1, GNG2, CHRNA7, RAB26, LGI1, RAPGEF2, TRFR2, KCND3, CRYAB, SOCS7, SSTR2, CCR5, ERC2, CAR4, ARFGAP2, CACNB2, ABCA1, NRN1, KCNJ3, CAPZB, SLC11A2, PVRL4, GPR22, ADRA2C, CNKSR2, PTPN6, CACNA2D1, GABRA2, GPR158, TRPC4, KCNB1, CELSR3, HOMER1, RGNEF, GPR151, LIN7A, ABCG2, CORO1A, ADRA1A, SMURF2, CACNA1D, SLC9A1…	372	2906	12504	1.23764	0.947104	0.167827	11.6292
GOTERM_MF_FAT	GO:0000166~nucleotide binding	81	12.9808	0.00912223	ADCY3, D2HGDH, PRPF4B, UBE2G2, PRKAG2, DTYMK, ATL3, CRCP, RBM6, QARS, SETX, ATP2B1, CSNK2A2, ACVR1B, ACTR2, DIRAS1, AGPS, NT5C2, ATP8B2, RAB26, TLK2, AKT3, KIF2A, MAP2K5, RAB39B, AARS, PIK3CD, MECP2, OLA1, MYLK2, ZFR2, SRPK1, DAPK1, COQ6, DDR1, KIF1B, RFC1, UBE2K, NEK9, RASD1, NEK7, KALRN, MYO5A, CHKA, ALDH18A1, HSPA1A, BRSK1, ABCA1, HSPA1B, ZNF512B, DGKG, HNRNPF, SYN2, SRR, UCK2, ACSL4, SLC30A9,…	380	2183	13288	1.2975	0.996161	0.461015	12.6775
SP_PIR_KEYWORDS	cell junction	22	3.52564	0.00917026	DLGAP1, GABRA2, GRIP1, GABRB1, NCS1, FBLIM1, ABI1, GRIA3, HOMER1, ARHGAP26, ZNRF2, LIN7A, PVRL4, GRIA2, GRIA1, SNPH, ASH1L, SYN2, DLG4, CHRNA7, ERC2, LGI1	545	392	17854	1.83855	0.953903	0.24401	11.761
GOTERM_BP_FAT	GO:0042127~regulation of cell proliferation	27	4.32692	0.00938358	E2F3, FOSL2, PTGS2, TSG101, FGF9, IFI30, ZBTB16, PTEN, PGR, CD9, BDNF, PRRT1, NKX3-1, ASPH, FIGF, TRAF5, PTPN6, KLF10, MECP2, MYCN, HDAC4, DDR1, CORO1A, JUN, FOXG1, PBX1, BMPR1A	402	538	13588	1.69633	1	0.44719	14.9224
GOTERM_BP_FAT	GO:0007613~memory	5	0.801282	0.00989689	PSEN1, GRIA1, MECP2, NTAN1, CHRNA7	402	29	13588	5.82776	1	0.454354	15.6749
GOTERM_BP_FAT	GO:0048489~synaptic vesicle transport	5	0.801282	0.00989689	PSEN1, TRIM9, STX4A, DLG4, LIN7A	402	29	13588	5.82776	1	0.454354	15.6749
SMART	SM00516:SEC14	5	0.801282	0.00998059	TRIO, CLVS1, ARHGAP8, SEC14L1, KALRN	304	26	9131	5.77619	0.868166	0.868166	11.8323
GOTERM_BP_FAT	GO:0008610~lipid biosynthetic process	17	2.72436	0.0106364	MYO5A, CHKA, PTGS2, ALOXE3, PRKAG2, MCAT, LPCAT2, LPCAT3, PIGK, ST6GALNAC6, STARD5, AGPS, PXMP3, MBOAT2, PBX1, ELOVL6, HSD17B7	402	285	13588	2.0162	1	0.468237	16.7481
SMART	SM00060:FN3	14	2.24359	0.0110523	FLRT3, CRLF3, PTPRG, HCFC2, NRCAM, TRIM9, D130043K22RIK, LRFN5, FNDC3A, IFNGR2, CHL1, USH2A, KALRN, DSCAM	304	191	9131	2.20161	0.894071	0.674532	13.023
GOTERM_CC_FAT	GO:0030018~Z disc	6	0.961538	0.011311	HDAC4, CRYAB, PDLIM5, PPP3CA, HOMER1, CAPZB	372	46	12504	4.38429	0.974048	0.193293	14.2366
KEGG_PATHWAY	mmu04662:B cell receptor signaling pathway	8	1.28205	0.0116063	PTPN6, JUN, PIK3CD, PPP3CB, PPP3R1, PPP3CA, PIK3R1, AKT3	179	80	5738	3.20559	0.790774	0.200267	12.7755
GOTERM_BP_FAT	GO:0003001~generation of a signal involved in cell-cell signaling	8	1.28205	0.0119463	MYO5A, BDNF, TRPC4, PSEN1, TRIM9, STX4A, SYN2, LIN7A	402	84	13588	3.21914	1	0.497886	18.6174
SP_PIR_KEYWORDS	neurogenesis	11	1.76282	0.0128395	DAB1, SMARCE1, SEMA4F, NTNG1, NEUROD2, ATOH7, NEUROD6, CHL1, SLIT2, SLIT3, KIF2A	545	144	17854	2.50247	0.986649	0.3021	16.0971
GOTERM_CC_FAT	GO:0030054~cell junction	24	3.84615	0.0130155	DLGAP1, GABRA2, GRIP1, GABRB1, UTRN, NCS1, FBLIM1, ABI1, GRIA3, HOMER1, CAPZB, ARHGAP26, ZNRF2, LIN7A, PVRL4, GRIA2, GRIA1, SNPH, ASH1L, SYN2, DLG4, CHRNA7, ERC2, LGI1	372	470	12504	1.7164	0.985085	0.208348	16.2114
GOTERM_CC_FAT	GO:0045121~membrane raft	8	1.28205	0.013024	ADCY3, STOM, RGMB, TRPC4, GRIP1, SMURF2, CHRNA7, SLC9A1	372	85	12504	3.16357	0.985126	0.19867	16.2212
GOTERM_CC_FAT	GO:0043228~non-membrane-bounded organelle	74	11.859	0.0133071	ALS2, PRPH, PRPF4B, UTRN, NCS1, MYLIP, PTPN20, KRTAP5-3, SETX, HOOK1, ACTR2, DYNLL1, GSN, MFAP1A, TMSB15B1, DLG4, CHRNA7, DEDD2, USH2A, TMSB15B2, KIF2A, MAP2K5, MRPL1, HIST1H1C, EXOSC6, UBR4, MECP2, FBLIM1, GRM1, MBD1, ARHGAP26, STOM, CD3EAP, KIF1B, RFC1, PSEN1, ACTL7B, RIN1, SGCE, ERC2, KALRN, MYO5A, THAP7, SDCCAG8, ING2, UPP2, ABI1, CAPZB, STAU2, TRP53BP1, UTP11L, ERCC6L, DLGAP1, HIST1H2BE, SMC…	372	1919	12504	1.29617	0.986435	0.193469	16.545
GOTERM_CC_FAT	GO:0043232~intracellular non-membrane-bounded organelle	74	11.859	0.0133071	ALS2, PRPH, PRPF4B, UTRN, NCS1, MYLIP, PTPN20, KRTAP5-3, SETX, HOOK1, ACTR2, DYNLL1, GSN, MFAP1A, TMSB15B1, DLG4, CHRNA7, DEDD2, USH2A, TMSB15B2, KIF2A, MAP2K5, MRPL1, HIST1H1C, EXOSC6, UBR4, MECP2, FBLIM1, GRM1, MBD1, ARHGAP26, STOM, CD3EAP, KIF1B, RFC1, PSEN1, ACTL7B, RIN1, SGCE, ERC2, KALRN, MYO5A, THAP7, SDCCAG8, ING2, UPP2, ABI1, CAPZB, STAU2, TRP53BP1, UTP11L, ERCC6L, DLGAP1, HIST1H2BE, SMC…	372	1919	12504	1.29617	0.986435	0.193469	16.545
GOTERM_CC_FAT	GO:0019898~extrinsic to membrane	24	3.84615	0.0134651	CNKSR2, DLGAP1, JPH3, CAP2, NAPG, PTGS2, CHMP5, TSG101, BAIAP2, VPS37A, NCS1, MYLIP, APPL2, ZNRF2, DOCK4, LIN7A, INVS, MFAP1A, PXMP3, DLG4, JAK1, GNG2, AKT3, PHLDA2	372	472	12504	1.70913	0.987115	0.187161	16.7252
SP_PIR_KEYWORDS	lipoprotein	29	4.64744	0.0138245	NKD2, GRIP1, EFNA3, PPP3R1, NCS1, NRN1, ZNRF2, EDNRB, CD9, DIRAS1, RGMB, DLG4, GNG2, RAB26, RAB39B, NTNG1, RGS19, GRIA3, STOM, SSTR2, GRIA2, CCR5, GRIA1, ARF3, VPS24, ADRA1A, CAR4, RASD1, VLDLR	545	589	17854	1.61295	0.990435	0.30069	17.2271
KEGG_PATHWAY	mmu04080:Neuroactive ligand-receptor interaction	16	2.5641	0.0145558	GABRA2, THRA, GABRB1, OXTR, GRIA3, VIPR1, GRM1, GRM5, EDNRB, SSTR2, HTR1A, GRIA2, GRIA1, ADRA1A, TAAR1, ADRA2C	179	260	5738	1.97267	0.859818	0.217766	15.7748
GOTERM_BP_FAT	GO:0006796~phosphate metabolic process	38	6.08974	0.0149115	PRPF4B, ABI1, BRSK1, PTPN20, PTEN, CSNK2A2, ACVR1B, PPP3CB, TLK2, PPP3CA, PIK3R1, AKT3, MAP2K5, GPD2, PTPN6, GPD1, PTPRG, PTPN2, PIK3CD, MECP2, MYLK2, TRIO, MAPK11, GRM1, SRPK1, ATM, DAPK1, DDR1, DUSP4, PSEN1, SBF2, ATP6V0A1, JAK1, NEK9, GYK, BMPR1A, KALRN, NEK7	402	866	13588	1.48318	1	0.566825	22.7041
GOTERM_BP_FAT	GO:0006793~phosphorus metabolic process	38	6.08974	0.0149115	PRPF4B, ABI1, BRSK1, PTPN20, PTEN, CSNK2A2, ACVR1B, PPP3CB, TLK2, PPP3CA, PIK3R1, AKT3, MAP2K5, GPD2, PTPN6, GPD1, PTPRG, PTPN2, PIK3CD, MECP2, MYLK2, TRIO, MAPK11, GRM1, SRPK1, ATM, DAPK1, DDR1, DUSP4, PSEN1, SBF2, ATP6V0A1, JAK1, NEK9, GYK, BMPR1A, KALRN, NEK7	402	866	13588	1.48318	1	0.566825	22.7041
GOTERM_MF_FAT	GO:0022836~gated channel activity	16	2.5641	0.0149732	KCND3, TRPC4, GABRA2, CACNA2D1, KCNAB2, GABRB1, KCNB1, CACNB2, GRIA3, KCNJ3, KCNV1, GRIA2, GRIA1, KCNF1, CHRNA7, CACNA1D	380	281	13288	1.99108	0.999895	0.599782	20.002
SP_PIR_KEYWORDS	nucleotide-binding	66	10.5769	0.0151566	ADCY3, PRPF4B, UBE2G2, ATL3, DTYMK, QARS, SETX, ATP2B1, CSNK2A2, ACVR1B, ACTR2, DIRAS1, NT5C2, ATP8B2, RAB26, TLK2, AKT3, KIF2A, MAP2K5, RAB39B, PIK3CD, AARS, OLA1, MYLK2, SRPK1, DAPK1, DDR1, KIF1B, RFC1, UBE2K, NEK9, RASD1, NEK7, KALRN, MYO5A, CHKA, ALDH18A1, HSPA1A, BRSK1, HSPA1B, ABCA1, ZNF512B, DGKG, UCK2, ACSL4, ERCC6L, RTCD1, SMC5, AK3, TRIO, MAPK11, AK5, ABCB7, DDX4, SMC2, ATM, ABCG2, RASL…	545	1631	17854	1.32565	0.99391	0.305361	18.7328
SP_PIR_KEYWORDS	atp-binding	54	8.65385	0.0152484	ADCY3, PRPF4B, UBE2G2, DTYMK, QARS, SETX, CSNK2A2, ATP2B1, ACVR1B, ACTR2, ATP8B2, TLK2, AKT3, KIF2A, MAP2K5, AARS, PIK3CD, MYLK2, OLA1, SRPK1, DAPK1, DDR1, KIF1B, RFC1, UBE2K, NEK9, KALRN, NEK7, MYO5A, CHKA, ALDH18A1, HSPA1A, HSPA1B, ABCA1, BRSK1, ZNF512B, DGKG, UCK2, ACSL4, ERCC6L, RTCD1, SMC5, TRIO, AK5, MAPK11, ABCB7, DDX4, SMC2, ATM, ABCG2, ADCY9, JAK1, GYK, BMPR1A, TRIT1	545	1287	17854	1.37453	0.994096	0.289755	18.8355
GOTERM_BP_FAT	GO:0019637~organophosphate metabolic process	12	1.92308	0.015391	GPD2, CHKA, PIGK, GPD1, PIK3CD, MECP2, MBOAT2, GYK, LPCAT2, PTEN, LPCAT3, PIK3R1	402	176	13588	2.30461	1	0.568174	23.3464
KEGG_PATHWAY	mmu05222:Small cell lung cancer	8	1.28205	0.0158574	TRAF2, E2F3, PTGS2, PIK3CD, TRAF5, PTEN, PIK3R1, AKT3	179	85	5738	3.01702	0.882571	0.21179	17.0681
INTERPRO	IPR002653:Zinc finger, A20-type	3	0.480769	0.0165907	ZFAND5, OTUD7A, TNFAIP3	526	7	17763	14.4728	1	0.982407	23.1382
SP_PIR_KEYWORDS	kinase	33	5.28846	0.016864	CHKA, ALDH18A1, PRPF4B, DTYMK, PRKAG2, BRSK1, CSNK2A2, ACVR1B, ZNF512B, PACSIN3, DGKG, TLK2, UCK2, PIK3R1, AKT3, MAP2K5, CNKSR2, PIK3CD, AK3, MYLK2, TRIO, AK5, MAPK11, SRPK1, ATM, DAPK1, DDR1, NEK9, JAK1, GYK, BMPR1A, KALRN, NEK7	545	707	17854	1.52909	0.996588	0.298853	20.6255
GOTERM_BP_FAT	GO:0042596~fear response	4	0.641026	0.017397	ALS2, BDNF, MECP2, NEUROD2	402	19	13588	7.116	1	0.603255	25.9798
SP_PIR_KEYWORDS	transferase	57	9.13462	0.0182258	PRPF4B, DTYMK, CSNK2A2, GLT8D1, ACVR1B, ST6GALNAC6, AGPS, PRMT6, TLK2, AKT3, MAP2K5, SPTLC1, PIK3CD, PAPD7, MYLK2, PARP11, GALNTL1, LPCAT2, LPCAT3, SRPK1, DAPK1, DDR1, ASH1L, NEK9, SMS, GALNT9, MPST, KALRN, NEK7, CHKA, ALDH18A1, UPP2, BRSK1, HADHB, GLRX2, ZDHHC23, ZNF512B, ATIC, DGKG, UCK2, B4GALT2, B3GALT2, UST, MCAT, AK3, TRIO, MAPK11, AK5, ATM, METT10D, METTL13, BAAT, JAK1, MBOAT2, GYK, BMPR1A…	545	1385	17854	1.34823	0.997853	0.303291	22.1059
GOTERM_MF_FAT	GO:0019205~nucleobase, nucleoside, nucleotide kinase activity	5	0.801282	0.0186833	ZNF512B, DTYMK, AK3, AK5, UCK2	380	36	13288	4.85673	0.999989	0.646804	24.3453
GOTERM_BP_FAT	GO:0051259~protein oligomerization	7	1.12179	0.0193609	ALS2, STOM, SBF2, ATL3, SRR, USP16, ANXA5	402	72	13588	3.28621	1	0.633131	28.4753
GOTERM_MF_FAT	GO:0042802~identical protein binding	16	2.5641	0.0195099	ALS2, GPD1, CHKA, THRA, OLFML2B, ATL3, TREX1, HIATL1, PRDX3, ZBTB16, RGMB, CORO1A, SBF2, SRR, PYCARD, FIGF	380	290	13288	1.92929	0.999994	0.630879	25.2826
UP_SEQ_FEATURE	region of interest:Catalytic	6	0.961538	0.0195786	PCSK2, AARS, PPP3CB, MANEA, OTUD7A, PPP3CA	535	47	16021	3.82287	1	0.999999	27.9246
GOTERM_BP_FAT	GO:0051260~protein homooligomerization	6	0.961538	0.0196408	ALS2, STOM, ATL3, SRR, USP16, ANXA5	402	53	13588	3.82653	1	0.628908	28.8244
SP_PIR_KEYWORDS	cell membrane	68	10.8974	0.0198084	JPH3, NRG3, GRIP1, GABRB1, EFNA3, NCS1, CRCP, VIPR1, GPR88, ZNRF2, NRCAM, EDNRB, DIRAS1, HTR1A, PACSIN3, IL1RAP, DLG4, TAAR1, GNG2, CHRNA7, CALN1, RAB26, RAPGEF2, USH2A, TRFR2, TUB, KCND3, RAB39B, SOCS7, SEZ6L, GRM1, STOM, GRM5, SSTR2, CCR5, SGCE, CAR4, RASD1, CHL1, GRASP, NKD2, STX4A, CACNB2, OXTR, NRN1, PVRL4, GPR22, RGMB, ADRA2C, D130043K22RIK, HSD17B7, GABRA2, GPR158, DLGAP1, CAP2, NTNG1, CEL…	545	1713	17854	1.30044	0.998747	0.310125	23.794
GOTERM_CC_FAT	GO:0031674~I band	6	0.961538	0.020032	HDAC4, CRYAB, PDLIM5, PPP3CA, HOMER1, CAPZB	372	53	12504	3.80523	0.99849	0.255656	23.9055
SMART	SM00259:ZnF_A20	3	0.480769	0.0206387	ZFAND5, OTUD7A, TNFAIP3	304	7	9131	12.8727	0.985193	0.754441	23.0349
UP_SEQ_FEATURE	domain:SH3	12	1.92308	0.0207529	CASKIN1, SH3YL1, DOCK1, PACSIN3, BAIAP2, DLG4, CACNB2, TRIO, ABI1, PIK3R1, ARHGAP26, DOCK4	535	163	16021	2.2046	1	0.999963	29.3411
KEGG_PATHWAY	mmu04720:Long-term potentiation	7	1.12179	0.020812	GRM5, GRIA2, GRIA1, PPP3CB, PPP3R1, PPP3CA, GRM1	179	70	5738	3.20559	0.940289	0.245594	21.8269
GOTERM_BP_FAT	GO:0007269~neurotransmitter secretion	5	0.801282	0.0208981	PSEN1, TRIM9, STX4A, SYN2, LIN7A	402	36	13588	4.69458	1	0.642654	30.373
UP_SEQ_FEATURE	domain:Thioredoxin	5	0.801282	0.0209581	GLRX3, DNAJC16, GM12669, TXNDC9, PRDX3, PRDX1	535	32	16021	4.67903	1	0.999561	29.5859
GOTERM_CC_FAT	GO:0042995~cell projection	27	4.32692	0.0212742	MYO5A, ALS2, TNFRSF21, PRPH, UTRN, NCS1, ABI1, CAPZB, SLC11A2, NRCAM, ACTR2, GSN, PXMP3, CHRNA7, D230025D16RIK, USH2A, KCND3, BAIAP2, GRIA3, GRM1, CAPRIN1, DOCK4, PSEN1, GRIA2, NRSN1, ERC2, CHL1	372	575	12504	1.57835	0.998995	0.259269	25.1975
GOTERM_BP_FAT	GO:0000902~cell morphogenesis	17	2.72436	0.0212743	ALS2, NTNG1, PPP3R1, CELSR3, BRSK1, RGNEF, NRN1, SLIT2, SLIT3, SLITRK2, SLC11A2, NRCAM, BDNF, SEMA4F, FOXG1, CHL1, DSCAM	402	309	13588	1.8596	1	0.640204	30.8301
KEGG_PATHWAY	mmu05200:Pathways in cancer	18	2.88462	0.0219369	TRAF2, E2F3, PTGS2, FGF9, PIK3CD, FGF13, ZBTB16, PTEN, FZD6, DAPK1, ACVR1B, JUN, NKX3-1, JAK1, TRAF5, FIGF, AKT3, PIK3R1	179	323	5738	1.7864	0.948813	0.236778	22.8719
GOTERM_MF_FAT	GO:0019904~protein domain specific binding	12	1.92308	0.0219985	SH3BP5, PTPN6, ZFP106, DOCK1, DAB1, GRIA2, DYNLL1, BAIAP2, PYCARD, GRIA3, PTEN, DOCK4	380	192	13288	2.18553	0.999999	0.646059	28.0392
KEGG_PATHWAY	mmu05218:Melanoma	7	1.12179	0.0221674	E2F3, FGF9, PIK3CD, FGF13, PTEN, PIK3R1, AKT3	179	71	5738	3.16044	0.950404	0.221449	23.0845
GOTERM_MF_FAT	GO:0008066~glutamate receptor activity	5	0.801282	0.0223999	GRM5, GRIA2, GRIA1, GRIA3, GRM1	380	38	13288	4.60111	0.999999	0.625528	28.475
SP_PIR_KEYWORDS	ionic channel	17	2.72436	0.0226152	KCND3, CACNA2D1, TRPC4, GABRA2, KCNAB2, GABRB1, KCNB1, CACNB2, GRIA3, KCNJ3, KCNV1, GRIA2, MCOLN3, GRIA1, KCNF1, CHRNA7, CACNA1D	545	301	17854	1.85021	0.999519	0.331097	26.705
SP_PIR_KEYWORDS	sh3 domain	13	2.08333	0.0227322	CASKIN1, BAIAP2, CACNB2, TRIO, ABI1, ARHGAP26, DOCK4, SH3YL1, DOCK1, PACSIN3, DLG4, PIK3R1, KALRN	545	204	17854	2.08762	0.999538	0.318875	26.824
GOTERM_BP_FAT	GO:0050806~positive regulation of synaptic transmission	4	0.641026	0.0228658	GRIA2, MECP2, NCS1, LGI1	402	21	13588	6.43828	1	0.658156	32.733
GOTERM_CC_FAT	GO:0043025~cell soma	9	1.44231	0.0231028	MYO5A, KCND3, GRIA2, PSEN1, IAPP, GRIA3, CHRNA7, NRSN1, GRM1	372	117	12504	2.58561	0.999449	0.268476	27.0625
INTERPRO	IPR008957:Fibronectin, type III-like fold	12	1.92308	0.0234478	NRCAM, PTPRG, TRIM9, CRLF3, HCFC2, LRFN5, FNDC3A, IFNGR2, CHL1, USH2A, KALRN, DSCAM	526	187	17763	2.16706	1	0.989787	31.1492
KEGG_PATHWAY	mmu05212:Pancreatic cancer	7	1.12179	0.0235812	ACVR1B, E2F3, PIK3CD, JAK1, FIGF, PIK3R1, AKT3	179	72	5738	3.11654	0.959145	0.218062	24.3765
INTERPRO	IPR001452:Src homology-3 domain	13	2.08333	0.0236339	CASKIN1, BAIAP2, CACNB2, TRIO, ABI1, ARHGAP26, DOCK4, SH3YL1, DOCK1, PACSIN3, DLG4, PIK3R1, KALRN	526	211	17763	2.08061	1	0.978736	31.3553
GOTERM_BP_FAT	GO:0008104~protein localization	33	5.28846	0.0240548	ALS2, ARFGAP2, NAPG, FGF9, GRIP1, TSG101, CHMP5, STX4A, VPS37A, PPP3R1, NRCAM, HOOK1, VPS13C, PXMP3, NUP50, TMSB15B1, SEC22B, EXOC6, VPS13A, PPP3CA, RAB26, D230025D16RIK, TMSB15B2, RAB39B, MECP2, OPTN, LIN7A, GRIA2, 6230409E13RIK, PSEN1, ARF3, VPS24, XPO7, GRASP	402	753	13588	1.48132	1	0.668333	34.1224
GOTERM_BP_FAT	GO:0006928~cell motion	19	3.04487	0.0247553	ZFAND5, IL16, PLXNA2, PTEN, SLIT2, SLIT3, NRCAM, CD9, EDNRB, BDNF, CORO1A, DAB1, DOCK1, PSEN1, SEMA4F, PXMP3, FOXG1, CHRNA7, CHL1	402	367	13588	1.74992	1	0.670556	34.9283
KEGG_PATHWAY	mmu04150:mTOR signaling pathway	6	0.961538	0.0251878	CAB39L, PIK3CD, FIGF, PIK3R1, EIF4E2, AKT3	179	54	5738	3.56176	0.967235	0.216647	25.8206
UP_SEQ_FEATURE	cross-link:Glycyl lysine isopeptide (Lys-Gly) (interchain with G-Cter in ubiquitin)	12	1.92308	0.0252668	GPR158, THRA, HTR1A, VPS13C, HIST1H1C, MCL1, HIST1H2BE, TMBIM6, ASH1L, VPS24, HIST1H3D, RIC3	535	168	16021	2.13899	1	0.999432	34.5459
SP_PIR_KEYWORDS	differentiation	23	3.6859	0.0253748	MCL1, FGF9, DMRT3, NTNG1, HSPA1A, HSPA1B, RGNEF, SRPK1, SLIT2, SLIT3, HOOK1, DAB1, COL19A1, TBATA, SEMA4F, FAM120B, NEUROD2, PBX1, TLK2, NEUROD6, ATOH7, FIGF, CHL1, KIF2A	545	460	17854	1.63798	0.999813	0.335545	29.4662
GOTERM_BP_FAT	GO:0051971~positive regulation of transmission of nerve impulse	4	0.641026	0.0259102	GRIA2, MECP2, NCS1, LGI1	402	22	13588	6.14564	1	0.679218	36.2366
INTERPRO	IPR002017:Spectrin repeat	4	0.641026	0.0260387	SYNE1, UTRN, TRIO, KALRN	526	22	17763	6.13999	1	0.973773	33.9671
UP_SEQ_FEATURE	region of interest:Glutamate binding	3	0.480769	0.0271736	GRIA2, GRIA1, GRIA3	535	8	16021	11.2297	1	0.998774	36.6345
UP_SEQ_FEATURE	binding site:Glutamate	3	0.480769	0.0271736	GRIA2, GRIA1, GRIA3	535	8	16021	11.2297	1	0.998774	36.6345
GOTERM_BP_FAT	GO:0006072~glycerol-3-phosphate metabolic process	3	0.480769	0.0272624	GPD2, GPD1, GYK	402	9	13588	11.267	1	0.689984	37.737
SP_PIR_KEYWORDS	phosphoric monoester hydrolase	5	0.801282	0.0277667	PTPN6, PTPRG, PTPN2, PPP3CB, PPP3CA	545	38	17854	4.31048	0.999918	0.34787	31.7813
BIOCARTA	m_pdgfPathway:PDGF Signaling Pathway	5	0.801282	0.0282282	JUN, ELK1, 6330403L08RIK, JAK1, PIK3R1	51	28	1171	4.10014	0.981317	0.981317	28.6399
GOTERM_MF_FAT	GO:0008092~cytoskeletal protein binding	20	3.20513	0.0285329	MYO5A, CAP2, CLMN, BAIAP2, UTRN, MYLIP, DAAM1, CAPZB, MPRIP, HOOK1, NRCAM, ACTR2, CORO1A, SYNE1, KIF1B, PACSIN3, GSN, MFAP1A, TMSB15B1, USH2A, TMSB15B2	380	414	13288	1.6893	1	0.690075	34.833
GOTERM_BP_FAT	GO:0001655~urogenital system development	10	1.60256	0.0291186	BDNF, INVS, PYGO1, NKX3-1, PBX1, ZBTB16, FEM1B, GREM1, PTEN, SLIT2	402	146	13588	2.31514	1	0.706366	39.7425
GOTERM_BP_FAT	GO:0006071~glycerol metabolic process	4	0.641026	0.0291608	GPD2, GPD1, GYK, GPCPD1	402	23	13588	5.87843	1	0.699304	39.7873
KEGG_PATHWAY	mmu04660:T cell receptor signaling pathway	9	1.44231	0.0296084	PTPN6, JUN, PIK3CD, PPP3CB, PPP3R1, MAPK11, PPP3CA, PIK3R1, AKT3	179	118	5738	2.44494	0.98218	0.235472	29.665
GOTERM_BP_FAT	GO:0021700~developmental maturation	8	1.28205	0.029794	MYO5A, PGR, NRCAM, PSEN1, PTGS2, MECP2, DLG4, FEM1B	402	101	13588	2.67731	1	0.699733	40.457
COG_ONTOLOGY	Cell division and chromosome partitioning	8	1.28205	0.0303301	MYO5A, PPFIA2, PPFIA1, SMC5, OPTN, TRAF5, TRAIP, PIK3R1	61	104	2040	2.57251	0.507564	0.507564	21.6613
GOTERM_BP_FAT	GO:0009968~negative regulation of signal transduction	11	1.76282	0.0304393	PTPN6, DKK3, SOCS2, FGF9, ADRA1A, RGS19, SOCS7, NKX3-1, GREM1, PTEN, CHRD	402	171	13588	2.17433	1	0.700295	41.1322
GOTERM_CC_FAT	GO:0030017~sarcomere	7	1.12179	0.0313388	HDAC4, SYNE1, CRYAB, PDLIM5, PPP3CA, HOMER1, CAPZB	372	80	12504	2.94113	0.999964	0.335573	34.9407
GOTERM_BP_FAT	GO:0032989~cellular component morphogenesis	18	2.88462	0.031564	ALS2, NTNG1, PPP3R1, CELSR3, BRSK1, RGNEF, NRN1, SLIT2, SLIT3, SLITRK2, SLC11A2, NRCAM, CD9, BDNF, SEMA4F, FOXG1, CHL1, DSCAM	402	351	13588	1.73338	1	0.706444	42.2919
GOTERM_MF_FAT	GO:0015276~ligand-gated ion channel activity	8	1.28205	0.031903	TRPC4, GABRA2, GRIA2, GRIA1, GABRB1, GRIA3, CHRNA7, KCNJ3	380	106	13288	2.63913	1	0.707721	38.0983
GOTERM_MF_FAT	GO:0022834~ligand-gated channel activity	8	1.28205	0.031903	TRPC4, GABRA2, GRIA2, GRIA1, GABRB1, GRIA3, CHRNA7, KCNJ3	380	106	13288	2.63913	1	0.707721	38.0983
GOTERM_BP_FAT	GO:0031646~positive regulation of neurological system process	4	0.641026	0.0326165	GRIA2, MECP2, NCS1, LGI1	402	24	13588	5.6335	1	0.711446	43.3575
SP_PIR_KEYWORDS	neurotransmitter receptor	5	0.801282	0.0327947	HTR1A, GRIA2, GRIA1, CHRNA7, ADRA2C	545	40	17854	4.09495	0.999985	0.383823	36.4201
GOTERM_CC_FAT	GO:0044459~plasma membrane part	62	9.9359	0.0329062	GRIP1, GABRB1, UTRN, NCS1, CRCP, ZNRF2, ATP2B1, ACVR1B, DIRAS1, PACSIN3, SNPH, PRRT1, DLG4, GNG2, CHRNA7, RAB26, LGI1, USH2A, KCND3, RAB39B, FBLIM1, SOCS7, ARHGAP26, STOM, CCR5, PSEN1, ASH1L, SGCE, ERC2, RASD1, CR1L, ARFGAP2, STX4A, CACNB2, ABI1, ABCA1, KCNJ3, CAPZB, SLC11A2, PVRL4, RGMB, PLIN3, SYN2, PTPN6, CACNA2D1, GABRA2, TRPC4, DLGAP1, KCNB1, NTNG1, GRIA3, HOMER1, KCNV1, FZD6, LIN7A, CORO1A,…	372	1633	12504	1.27618	0.999978	0.338404	36.3477
GOTERM_BP_FAT	GO:0042640~anagen	3	0.480769	0.0334223	MYO5A, PSEN1, PTGS2	402	10	13588	10.1403	1	0.713514	44.1609
GOTERM_BP_FAT	GO:0008285~negative regulation of cell proliferation	13	2.08333	0.0340827	PTPN6, PTGS2, TSG101, IFI30, ZBTB16, PTEN, CD9, DDR1, HDAC4, BDNF, JUN, NKX3-1, ASPH	402	224	13588	1.96166	1	0.713949	44.8113
UP_SEQ_FEATURE	domain:CRAL-TRIO	4	0.641026	0.0354155	TRIO, CLVS1, ARHGAP8, KALRN	535	22	16021	5.44469	1	0.999458	44.9625
PIR_SUPERFAMILY	PIRSF002437:ionotropic glutamate receptor, AMPA/kainate types	3	0.480769	0.0357001	GRIA2, GRIA1, GRIA3	250	10	8136	9.7632	0.999981	0.999981	38.4634
SP_PIR_KEYWORDS	DNA damage	12	1.92308	0.0357844	RAD23B, TRP53BP1, BRCC3, CINP, PRMT6, SMC5, TREX1, FBXO31, TLK2, ATRIP, ATM, SETX	545	194	17854	2.02637	0.999995	0.397777	39.038
GOTERM_BP_FAT	GO:0001505~regulation of neurotransmitter levels	6	0.961538	0.0358067	PSEN1, AGTPBP1, TRIM9, STX4A, SYN2, LIN7A	402	62	13588	3.27106	1	0.725316	46.4756
GOTERM_BP_FAT	GO:0019400~alditol metabolic process	4	0.641026	0.0362757	GPD2, GPD1, GYK, GPCPD1	402	25	13588	5.40816	1	0.723624	46.9202
SP_PIR_KEYWORDS	guanine-nucleotide releasing factor	8	1.28205	0.0363106	ALS2, DOCK1, ABR, TRIO, RGNEF, RAPGEF2, DOCK4, KALRN	545	102	17854	2.56938	0.999996	0.389902	39.4883
GOTERM_BP_FAT	GO:0032869~cellular response to insulin stimulus	5	0.801282	0.0373259	ZFP106, PTPN2, SOCS7, PIK3R1, AKT3	402	43	13588	3.93035	1	0.727662	47.903
GOTERM_MF_FAT	GO:0035004~phosphoinositide 3-kinase activity	3	0.480769	0.0376422	PIK3CD, PIK3R1, ATM	380	11	13288	9.53684	1	0.745892	43.3104
GOTERM_MF_FAT	GO:0016303~1-phosphatidylinositol-3-kinase activity	3	0.480769	0.0376422	PIK3CD, PIK3R1, ATM	380	11	13288	9.53684	1	0.745892	43.3104
GOTERM_CC_FAT	GO:0005768~endosome	14	2.24359	0.0377494	ALS2, CYTIP, TSG101, CHMP5, NSG2, VPS37A, MMD, APPL2, ZNRF2, SLC11A2, CCR5, RNF128, PLIN3, VPS24	372	252	12504	1.86738	0.999996	0.367129	40.5192
SP_PIR_KEYWORDS	calmodulin-binding	8	1.28205	0.0379807	MYO5A, ADCY3, INVS, PPP3CB, UBR4, MYLK2, PPP3CA, DAPK1	545	103	17854	2.54444	0.999998	0.391899	40.8972
GOTERM_MF_FAT	GO:0005230~extracellular ligand-gated ion channel activity	6	0.961538	0.039827	GABRA2, GRIA2, GRIA1, GABRB1, GRIA3, CHRNA7	380	66	13288	3.17895	1	0.746028	45.1847
GOTERM_BP_FAT	GO:0040017~positive regulation of locomotion	5	0.801282	0.0401375	CORO1A, IL16, CCL21A, ARHGAP8, GM1987, PIK3R1	402	44	13588	3.84102	1	0.747558	50.4506
GOTERM_CC_FAT	GO:0044449~contractile fiber part	7	1.12179	0.0424022	HDAC4, SYNE1, CRYAB, PDLIM5, PPP3CA, HOMER1, CAPZB	372	86	12504	2.73593	0.999999	0.391476	44.287
GOTERM_BP_FAT	GO:0008217~regulation of blood pressure	6	0.961538	0.042595	EDNRB, PTGS2, MECP2, OXTR, ADRA1A, CHRNA7	402	65	13588	3.12009	1	0.76258	52.5808
GOTERM_MF_FAT	GO:0005216~ion channel activity	17	2.72436	0.042738	KCND3, CACNA2D1, TRPC4, GABRA2, KCNAB2, GABRB1, KCNB1, CACNB2, GRIA3, KCNJ3, KCNV1, GRIA2, MCOLN3, GRIA1, KCNF1, CHRNA7, CACNA1D	380	349	13288	1.70333	1	0.752266	47.5923
INTERPRO	IPR001791:Laminin G	5	0.801282	0.0433321	NELL1, CELSR3, USH2A, SLIT2, SLIT3	526	45	17763	3.75222	1	0.995248	50.1836
GOTERM_BP_FAT	GO:0045596~negative regulation of cell differentiation	11	1.76282	0.0436568	HDAC4, BDNF, PSEN1, IAPP, SEMA4F, FOXG1, PBX1, ZBTB16, CHRD, PIK3R1, BMPR1A	402	182	13588	2.04292	1	0.765431	53.4742
GOTERM_MF_FAT	GO:0030295~protein kinase activator activity	3	0.480769	0.0443345	ALS2, FGF13, ABI1	380	12	13288	8.74211	1	0.747487	48.8705
INTERPRO	IPR003968:Potassium channel, voltage dependent, Kv	4	0.641026	0.0444017	KCND3, KCNB1, KCNF1, KCNV1	526	27	17763	5.00296	1	0.992364	51.0525
GOTERM_MF_FAT	GO:0005516~calmodulin binding	8	1.28205	0.0445708	MYO5A, ADCY3, INVS, PPP3CB, UBR4, MYLK2, PPP3CA, DAPK1	380	114	13288	2.45392	1	0.732303	49.0572
GOTERM_CC_FAT	GO:0043197~dendritic spine	4	0.641026	0.0447756	ALS2, GRIA2, GRIA3, CHRNA7	372	27	12504	4.97969	1	0.397735	46.1226
GOTERM_MF_FAT	GO:0000287~magnesium ion binding	19	3.04487	0.0448505	ADCY3, NUDT5, FOXK2, TREX1, BRSK1, PRPSAP1, PTEN, SRPK1, ACVR1B, ADCY9, NT5C2, SRR, NEK9, ATP8B2, ACSL4, BMPR1A, NEK7, MAP2K5, KALRN	380	409	13288	1.62445	1	0.718064	49.2774
GOTERM_BP_FAT	GO:0006650~glycerophospholipid metabolic process	7	1.12179	0.0456254	CHKA, PIGK, PIK3CD, MECP2, LPCAT2, PTEN, PIK3R1	402	88	13588	2.68872	1	0.775094	55.0889
UP_SEQ_FEATURE	zinc finger region:PHD-type	5	0.801282	0.0467951	ZMYND11, ING2, ASH1L, PYGO1, PHF20	535	41	16021	3.65193	1	0.999841	54.7828
GOTERM_BP_FAT	GO:0008038~neuron recognition	3	0.480769	0.0471584	BDNF, FOXG1, CELSR3	402	12	13588	8.45025	1	0.780969	56.3095
INTERPRO	IPR001849:Pleckstrin homology	14	2.24359	0.0473047	CNKSR2, ALS2, ABR, TRIO, RGNEF, APPL2, ARHGAP26, MPRIP, KIF1B, TEX2, SBF2, AKT3, PHLDA2, KALRN	526	261	17763	1.81142	1	0.990733	53.3399
GOTERM_BP_FAT	GO:0007243~protein kinase cascade	13	2.08333	0.0476403	CNKSR2, NRG3, FGF13, MAPK11, GRM1, SRPK1, DAPK1, DAB1, PSEN1, PRRT1, JAK1, MAP2K5, SLC9A1	402	236	13588	1.86192	1	0.779109	56.6868
KEGG_PATHWAY	mmu04914:Progesterone-mediated oocyte maturation	7	1.12179	0.0476536	ADCY3, PGR, ADCY9, PIK3CD, MAPK11, PIK3R1, AKT3	179	85	5738	2.63989	0.998559	0.335634	43.5421
GOTERM_BP_FAT	GO:0008286~insulin receptor signaling pathway	4	0.641026	0.048452	ZFP106, PTPN2, SOCS7, PIK3R1	402	28	13588	4.82871	1	0.779633	57.3152
SMART	SM00326:SH3	13	2.08333	0.0484698	CASKIN1, BAIAP2, CACNB2, TRIO, ABI1, ARHGAP26, DOCK4, SH3YL1, DOCK1, PACSIN3, DLG4, PIK3R1, KALRN	304	211	9131	1.85057	0.999956	0.918653	46.4069
BIOCARTA	m_mapkPathway:MAPKinase Signaling Pathway	8	1.28205	0.0485118	TRAF2, SP1, JUN, ELK1, MAPK11, RAPGEF2, TRADD, MAP2K5	51	80	1171	2.29608	0.999004	0.968447	44.3452
INTERPRO	IPR017956:AT hook, DNA-binding, conserved site	4	0.641026	0.0486743	ASH1L, MECP2, PHF20, GLYR1	526	28	17763	4.82428	1	0.9875	54.384
GOTERM_BP_FAT	GO:0010648~negative regulation of cell communication	11	1.76282	0.0493044	PTPN6, DKK3, SOCS2, FGF9, ADRA1A, RGS19, SOCS7, NKX3-1, GREM1, PTEN, CHRD	402	186	13588	1.99898	1	0.780425	57.9659
INTERPRO	IPR011993:Pleckstrin homology-type	15	2.40385	0.0495147	CNKSR2, TRIO, MYLIP, RGNEF, HOMER1, APPL2, ARHGAP26, MPRIP, DAB1, KIF1B, SBF2, MFAP1A, NUP50, AKT3, KALRN	526	289	17763	1.75277	1	0.983227	55.0137
GOTERM_BP_FAT	GO:0035295~tube development	14	2.24359	0.049773	FGF9, PPP3R1, GREM1, FZD6, MYCN, PGR, DDR1, BDNF, SP1, PSEN1, NUP50, NKX3-1, PBX1, BMPR1A	402	264	13588	1.79248	1	0.778571	58.3197
KEGG_PATHWAY	mmu04360:Axon guidance	9	1.44231	0.0500809	PLXNA2, SEMA4F, EFNA3, PPP3CB, NTNG1, PPP3R1, PPP3CA, SLIT2, SLIT3	179	131	5738	2.20231	0.998977	0.333012	45.2041
GOTERM_BP_FAT	GO:0007565~female pregnancy	6	0.961538	0.0501076	PGR, DDR1, SP1, ACSL4, HSD17B7, CR1L	402	68	13588	2.98244	1	0.77584	58.5706
GOTERM_MF_FAT	GO:0042803~protein homodimerization activity	11	1.76282	0.0503363	ALS2, CHKA, GPD1, THRA, SBF2, OLFML2B, PYCARD, SRR, TREX1, ZBTB16, FIGF	380	193	13288	1.99302	1	0.744118	53.4202
SP_PIR_KEYWORDS	palmitate	12	1.92308	0.0512168	STOM, CD9, EDNRB, SSTR2, CCR5, GRIA2, GRIA1, GRIP1, DLG4, ADRA1A, RGS19, GRIA3	545	206	17854	1.90833	1	0.478149	51.0345
GOTERM_MF_FAT	GO:0043167~ion binding	128	20.5128	0.0525429	ADCY3, MKRN1, HCCS, THRA, ALOXE3, PTGS2, NELL1, PDLIM5, GABRB1, UTRN, RBM6, DLK2, MYLIP, ZNRF2, PGR, NT5C2, ASPH, CYHR1, MAP2K5, KCND3, NUDT5, UBR4, LPCAT2, PYGO1, NEK9, TNFAIP3, CAR4, RFESD, MYNN, NEK7, KALRN, ARFGAP2, ZFAND5, TRAF2, ELAC1, SLC38A10, CACNB2, ZC3H6, KCNJ3, SLC11A2, SRR, OTUD7A, ZFP810, TRAF5, SLC30A9, PLAGL2, GPD2, CACNA2D1, GABRA2, TRPC4, PTGR2, B4GALT2, KCNB1, KLF10, GUSB, TREX…	380	3934	13288	1.13776	1	0.744641	54.9958
GOTERM_BP_FAT	GO:0010959~regulation of metal ion transport	5	0.801282	0.0525555	CACNA2D1, TRPC4, SLN, HOMER1, AKT3	402	48	13588	3.52094	1	0.787191	60.3631
GOTERM_BP_FAT	GO:0048167~regulation of synaptic plasticity	5	0.801282	0.0525555	GRM5, BDNF, PSEN1, MECP2, DLG4	402	48	13588	3.52094	1	0.787191	60.3631
GOTERM_BP_FAT	GO:0051240~positive regulation of multicellular organismal process	10	1.60256	0.0525672	GRIA2, PSEN1, FGF9, PYCARD, MECP2, NCS1, ADRA1A, CHRNA7, LGI1, TRADD	402	163	13588	2.07368	1	0.78244	60.3714
INTERPRO	IPR001828:Extracellular ligand-binding receptor	5	0.801282	0.0528686	GRM5, GRIA2, GRIA1, GRIA3, GRM1	526	48	17763	3.5177	1	0.982336	57.4469
GOTERM_CC_FAT	GO:0030016~myofibril	7	1.12179	0.0532888	HDAC4, SYNE1, CRYAB, PDLIM5, PPP3CA, HOMER1, CAPZB	372	91	12504	2.58561	1	0.44342	52.2562
SP_PIR_KEYWORDS	Apoptosis	17	2.72436	0.053312	TRAF2, TNFRSF21, MCL1, TMBIM6, HRK, FEM1B, PTEN, TRADD, DAPK1, DRAM2, DOCK1, PSEN1, SERPINA3G, PYCARD, TNFAIP3, TRAF5, DEDD2	545	337	17854	1.65256	1	0.479786	52.4828
GOTERM_MF_FAT	GO:0022838~substrate specific channel activity	17	2.72436	0.0537874	KCND3, CACNA2D1, TRPC4, GABRA2, KCNAB2, GABRB1, KCNB1, CACNB2, GRIA3, KCNJ3, KCNV1, GRIA2, MCOLN3, GRIA1, KCNF1, CHRNA7, CACNA1D	380	360	13288	1.65129	1	0.73878	55.8624
GOTERM_BP_FAT	GO:0010035~response to inorganic substance	7	1.12179	0.0545433	SLC11A2, D2HGDH, GRIA2, GRIA3, PRDX3, PRDX1, GLRX2	402	92	13588	2.57181	1	0.790206	61.7647
SP_PIR_KEYWORDS	voltage-gated channel	9	1.44231	0.0545991	KCND3, CACNA2D1, KCNAB2, KCNB1, CACNB2, KCNF1, CACNA1D, KCNJ3, KCNV1	545	135	17854	2.18398	1	0.476202	53.3527
GOTERM_BP_FAT	GO:0050808~synapse organization	5	0.801282	0.0559513	MYO5A, ALS2, UTRN, MECP2, DLG4	402	49	13588	3.44908	1	0.794137	62.7291
GOTERM_MF_FAT	GO:0001639~PLC activating metabotropic glutamate receptor activity	2	0.320513	0.0562325	GRM5, GRM1	380	2	13288	34.9684	1	0.741063	57.5199
GOTERM_MF_FAT	GO:0004368~glycerol-3-phosphate dehydrogenase activity	2	0.320513	0.0562325	GPD2, GPD1	380	2	13288	34.9684	1	0.741063	57.5199
SP_PIR_KEYWORDS	laminin egf-like domain	4	0.641026	0.0572234	MEGF9, NTNG1, CELSR3, USH2A	545	29	17854	4.51857	1	0.481099	55.081
INTERPRO	IPR000372:Leucine-rich repeat, cysteine-rich flanking region, N-terminal	7	1.12179	0.0574124	SLITRK2, FLRT3, LRRC33, LGI1, LRFN5, SLIT2, SLIT3	526	93	17763	2.54183	1	0.983088	60.547
GOTERM_BP_FAT	GO:0016311~dephosphorylation	9	1.44231	0.0575022	DUSP4, PTPN6, SBF2, PTPRG, PTPN2, PPP3CB, PPP3CA, PTPN20, PTEN	402	141	13588	2.15751	1	0.798728	63.7648
GOTERM_BP_FAT	GO:0016053~organic acid biosynthetic process	9	1.44231	0.0575022	MYO5A, ALDH18A1, ALOXE3, PTGS2, PXMP3, MCAT, PRKAG2, SRR, ELOVL6	402	141	13588	2.15751	1	0.798728	63.7648
GOTERM_BP_FAT	GO:0046394~carboxylic acid biosynthetic process	9	1.44231	0.0575022	MYO5A, ALDH18A1, ALOXE3, PTGS2, PXMP3, MCAT, PRKAG2, SRR, ELOVL6	402	141	13588	2.15751	1	0.798728	63.7648
GOTERM_BP_FAT	GO:0010498~proteasomal protein catabolic process	4	0.641026	0.0575386	RAD23B, UBE2G2, PPP2R5C, FBXO31	402	30	13588	4.5068	1	0.794471	63.7888
GOTERM_BP_FAT	GO:0000077~DNA damage checkpoint	4	0.641026	0.0575386	BRCC3, FBXO31, BRSK1, ATM	402	30	13588	4.5068	1	0.794471	63.7888
GOTERM_BP_FAT	GO:0043161~proteasomal ubiquitin-dependent protein catabolic process	4	0.641026	0.0575386	RAD23B, UBE2G2, PPP2R5C, FBXO31	402	30	13588	4.5068	1	0.794471	63.7888
GOTERM_BP_FAT	GO:0010226~response to lithium ion	2	0.320513	0.0581539	GRIA2, GRIA3	402	2	13588	33.801	1	0.79361	64.1919
INTERPRO	IPR019588:Metabotropic glutamate receptor, Homer-binding domain	2	0.320513	0.0582397	GRM5, GRM1	526	2	17763	33.77	1	0.979022	61.0882
INTERPRO	IPR017971:GPCR, family 3, metabotropic glutamate receptor 1/5	2	0.320513	0.0582397	GRM5, GRM1	526	2	17763	33.77	1	0.979022	61.0882
GOTERM_MF_FAT	GO:0004674~protein serine/threonine kinase activity	19	3.04487	0.05847	PRPF4B, PRKAG2, MYLK2, TRIO, MAPK11, BRSK1, SRPK1, ATM, DAPK1, CSNK2A2, ACVR1B, NEK9, CPNE3, TLK2, AKT3, BMPR1A, NEK7, MAP2K5, KALRN	380	421	13288	1.57815	1	0.741921	58.9855
GOTERM_MF_FAT	GO:0019201~nucleotide kinase activity	3	0.480769	0.0588942	DTYMK, AK3, AK5	380	14	13288	7.49323	1	0.731763	59.2581
GOTERM_MF_FAT	GO:0046872~metal ion binding	125	20.0321	0.0590846	ADCY3, MKRN1, HCCS, THRA, ALOXE3, PTGS2, NELL1, PDLIM5, UTRN, RBM6, DLK2, MYLIP, ZNRF2, PGR, NT5C2, ASPH, CYHR1, MAP2K5, KCND3, NUDT5, UBR4, LPCAT2, PYGO1, NEK9, TNFAIP3, CAR4, RFESD, MYNN, NEK7, KALRN, ARFGAP2, ZFAND5, TRAF2, ELAC1, SLC38A10, CACNB2, ZC3H6, KCNJ3, SLC11A2, SRR, OTUD7A, ZFP810, TRAF5, SLC30A9, PLAGL2, GPD2, CACNA2D1, TRPC4, PTGR2, B4GALT2, KCNB1, KLF10, SMYD4, CELSR3, TREX1, RGNE…	380	3850	13288	1.13534	1	0.720497	59.3798
GOTERM_MF_FAT	GO:0022803~passive transmembrane transporter activity	17	2.72436	0.0594071	KCND3, CACNA2D1, TRPC4, GABRA2, KCNAB2, GABRB1, KCNB1, CACNB2, GRIA3, KCNJ3, KCNV1, GRIA2, MCOLN3, GRIA1, KCNF1, CHRNA7, CACNA1D	380	365	13288	1.62867	1	0.710381	59.5853
GOTERM_MF_FAT	GO:0015267~channel activity	17	2.72436	0.0594071	KCND3, CACNA2D1, TRPC4, GABRA2, KCNAB2, GABRB1, KCNB1, CACNB2, GRIA3, KCNJ3, KCNV1, GRIA2, MCOLN3, GRIA1, KCNF1, CHRNA7, CACNA1D	380	365	13288	1.62867	1	0.710381	59.5853
GOTERM_BP_FAT	GO:0022404~molting cycle process	5	0.801282	0.0594625	MYO5A, ACVR1B, PSEN1, PTGS2, AARS	402	50	13588	3.3801	1	0.796702	65.0353
GOTERM_BP_FAT	GO:0022405~hair cycle process	5	0.801282	0.0594625	MYO5A, ACVR1B, PSEN1, PTGS2, AARS	402	50	13588	3.3801	1	0.796702	65.0353
GOTERM_BP_FAT	GO:0001942~hair follicle development	5	0.801282	0.0594625	MYO5A, ACVR1B, PSEN1, PTGS2, AARS	402	50	13588	3.3801	1	0.796702	65.0353
GOTERM_BP_FAT	GO:0012502~induction of programmed cell death	10	1.60256	0.0594852	PTPN6, UTP11L, KLF10, PYCARD, PTEN, PRDX1, ATM, TRADD, PLAGL2, DAPK1	402	167	13588	2.02401	1	0.792524	65.0497
GOTERM_BP_FAT	GO:0006917~induction of apoptosis	10	1.60256	0.0594852	PTPN6, UTP11L, KLF10, PYCARD, PTEN, PRDX1, ATM, TRADD, PLAGL2, DAPK1	402	167	13588	2.02401	1	0.792524	65.0497
GOTERM_MF_FAT	GO:0043169~cation binding	126	20.1923	0.0595272	ADCY3, MKRN1, HCCS, THRA, ALOXE3, PTGS2, NELL1, PDLIM5, UTRN, RBM6, DLK2, MYLIP, ZNRF2, PGR, NT5C2, ASPH, CYHR1, MAP2K5, KCND3, NUDT5, UBR4, LPCAT2, PYGO1, NEK9, TNFAIP3, CAR4, RFESD, MYNN, NEK7, KALRN, ARFGAP2, ZFAND5, TRAF2, ELAC1, SLC38A10, CACNB2, ZC3H6, KCNJ3, SLC11A2, SRR, OTUD7A, ZFP810, TRAF5, SLC30A9, PLAGL2, GPD2, CACNA2D1, TRPC4, PTGR2, B4GALT2, KCNB1, KLF10, GUSB, TREX1, SMYD4, CELSR3…	380	3885	13288	1.13411	1	0.699322	59.6616
INTERPRO	IPR000152:EGF-type aspartate/asparagine hydroxylation conserved site	7	1.12179	0.0598729	MATN4, NELL1, CELSR3, DLK2, SLIT2, VLDLR, SLIT3	526	94	17763	2.51478	1	0.975949	62.1363
GOTERM_CC_FAT	GO:0005829~cytosol	24	3.84615	0.0607977	ALS2, TUB, GPD1, THRA, CHMP5, UBE2G2, PIK3CD, MECP2, UBQLN4, ZBTB16, CAPRIN1, HDAC4, ZFP106, TBATA, DYNLL1, GSN, PYCARD, VPS24, PDRG1, CPNE3, PPP3CA, FNDC3A, PIK3R1, DNAJB5	372	549	12504	1.46942	1	0.477693	57.1228
SP_PIR_KEYWORDS	ligase	15	2.40385	0.0610966	MKRN1, RTCD1, UBE2CBP, UBE2G2, AARS, UBR4, QARS, MYLIP, UBE3C, ZNRF2, UBE2K, RNF128, HECTD2, SMURF2, ACSL4	545	290	17854	1.69446	1	0.492995	57.5236
SMART	SM00282:LamG	5	0.801282	0.0611506	NELL1, CELSR3, USH2A, SLIT2, SLIT3	304	45	9131	3.33735	0.999997	0.92186	54.7145
GOTERM_BP_FAT	GO:0042981~regulation of apoptosis	24	3.84615	0.0621947	TRAF2, MCL1, QARS, HSPA1A, ZBTB16, HSPA1B, PRDX1, PTEN, BDNF, UTP11L, PYCARD, TRAF5, PIK3R1, DEDD2, PLAGL2, PTPN6, KLF10, TMBIM6, AARS, MECP2, HRK, ATM, DAPK1, TRADD, PSEN1	402	553	13588	1.46695	1	0.803155	66.7361
GOTERM_BP_FAT	GO:0042391~regulation of membrane potential	8	1.28205	0.062469	MYO5A, CD9, PSEN1, PXMP3, MECP2, ADRA1A, CHRNA7, PPP3CA	402	119	13588	2.27234	1	0.800474	66.9024
GOTERM_BP_FAT	GO:0001976~neurological system process involved in regulation of systemic arterial blood pressure	3	0.480769	0.0625655	MECP2, ADRA1A, CHRNA7	402	14	13588	7.24307	1	0.796877	66.9608
GOTERM_BP_FAT	GO:0007041~lysosomal transport	3	0.480769	0.0625655	ALS2, HOOK1, CHMP5	402	14	13588	7.24307	1	0.796877	66.9608
GOTERM_BP_FAT	GO:0001662~behavioral fear response	3	0.480769	0.0625655	ALS2, MECP2, NEUROD2	402	14	13588	7.24307	1	0.796877	66.9608
GOTERM_BP_FAT	GO:0002209~behavioral defense response	3	0.480769	0.0625655	ALS2, MECP2, NEUROD2	402	14	13588	7.24307	1	0.796877	66.9608
GOTERM_BP_FAT	GO:0001952~regulation of cell-matrix adhesion	3	0.480769	0.0625655	DDR1, PTEN, PIK3R1	402	14	13588	7.24307	1	0.796877	66.9608
GOTERM_CC_FAT	GO:0043292~contractile fiber	7	1.12179	0.063115	HDAC4, SYNE1, CRYAB, PDLIM5, PPP3CA, HOMER1, CAPZB	372	95	12504	2.47674	1	0.48003	58.5293
GOTERM_CC_FAT	GO:0008328~ionotropic glutamate receptor complex	3	0.480769	0.0631559	GRIA2, GRIA1, DLG4	372	14	12504	7.20276	1	0.469848	58.5537
GOTERM_BP_FAT	GO:0046903~secretion	12	1.92308	0.0635114	MYO5A, BDNF, TRPC4, NKD2, PSEN1, TRIM9, STX4A, SYN2, MECP2, EXOC6, ABCA1, LIN7A	402	221	13588	1.83535	1	0.797824	67.5276
SMART	SM00384:AT_hook	4	0.641026	0.0643398	ASH1L, MECP2, PHF20, GLYR1	304	28	9131	4.29088	0.999999	0.893428	56.6084
KEGG_PATHWAY	mmu05211:Renal cell carcinoma	6	0.961538	0.0652175	JUN, PIK3CD, FLCN, FIGF, PIK3R1, AKT3	179	70	5738	2.74765	0.999881	0.39472	54.5984
KEGG_PATHWAY	mmu04114:Oocyte meiosis	8	1.28205	0.0655457	ADCY3, PGR, ADCY9, PPP2R5C, PPP3CB, PPP3R1, PPP2R5E, PPP3CA	179	115	5738	2.22997	0.999887	0.38005	54.7848
UP_SEQ_FEATURE	domain:DH 1	2	0.320513	0.0655535	TRIO, KALRN	535	2	16021	29.9458	1	0.999983	67.465
UP_SEQ_FEATURE	domain:DH 2	2	0.320513	0.0655535	TRIO, KALRN	535	2	16021	29.9458	1	0.999983	67.465
UP_SEQ_FEATURE	region of interest:Calcineurin B binding-site 1	2	0.320513	0.0655535	PPP3CB, PPP3CA	535	2	16021	29.9458	1	0.999983	67.465
UP_SEQ_FEATURE	region of interest:Calcineurin B binding-site 2	2	0.320513	0.0655535	PPP3CB, PPP3CA	535	2	16021	29.9458	1	0.999983	67.465
UP_SEQ_FEATURE	region of interest:TRAF-binding	2	0.320513	0.0655535	OTUD7A, TNFAIP3	535	2	16021	29.9458	1	0.999983	67.465
UP_SEQ_FEATURE	region of interest:C-terminal basic extension	2	0.320513	0.0655535	GM10591, CCL21C, CCL21A, CCL21B, GM13304, GM1987, LOC100041593	535	2	16021	29.9458	1	0.999983	67.465
GOTERM_MF_FAT	GO:0015036~disulfide oxidoreductase activity	3	0.480769	0.0667065	GLRX3, GM12669, IFI30, GLRX2	380	15	13288	6.99368	1	0.73005	63.9845
GOTERM_BP_FAT	GO:0042303~molting cycle	5	0.801282	0.0668278	MYO5A, ACVR1B, PSEN1, PTGS2, AARS	402	52	13588	3.2501	1	0.810666	69.4434
GOTERM_BP_FAT	GO:0042633~hair cycle	5	0.801282	0.0668278	MYO5A, ACVR1B, PSEN1, PTGS2, AARS	402	52	13588	3.2501	1	0.810666	69.4434
GOTERM_MF_FAT	GO:0016667~oxidoreductase activity, acting on sulfur group of donors	4	0.641026	0.0669088	GLRX3, MSRA, GM12669, IFI30, GLRX2	380	33	13288	4.2386	1	0.72024	64.0998
GOTERM_BP_FAT	GO:0006816~calcium ion transport	8	1.28205	0.067071	ATP2B1, CACNA2D1, CORO1A, TRPC4, CACNB2, CHRNA7, PPP3CA, CACNA1D	402	121	13588	2.23478	1	0.807977	69.5796
GOTERM_BP_FAT	GO:0034097~response to cytokine stimulus	4	0.641026	0.0673666	CORO1A, MCL1, SERPINA3G, PPP3CB	402	32	13588	4.22512	1	0.805574	69.7444
GOTERM_BP_FAT	GO:0048741~skeletal muscle fiber development	4	0.641026	0.0673666	ALS2, UTRN, PPP3CA, HOMER1	402	32	13588	4.22512	1	0.805574	69.7444
INTERPRO	IPR018159:Spectrin/alpha-actinin	4	0.641026	0.0676597	SYNE1, UTRN, TRIO, KALRN	526	32	17763	4.22125	1	0.981331	66.7796
UP_SEQ_FEATURE	domain:EGF-like 3	6	0.961538	0.0687694	MATN4, NELL1, DLK2, SLIT2, VLDLR, SLIT3	535	66	16021	2.72234	1	0.99997	69.2705
GOTERM_BP_FAT	GO:0043067~regulation of programmed cell death	24	3.84615	0.0688371	TRAF2, MCL1, QARS, HSPA1A, ZBTB16, HSPA1B, PRDX1, PTEN, BDNF, UTP11L, PYCARD, TRAF5, PIK3R1, DEDD2, PLAGL2, PTPN6, KLF10, TMBIM6, AARS, MECP2, HRK, ATM, DAPK1, TRADD, PSEN1	402	560	13588	1.44861	1	0.808873	70.5518
GOTERM_BP_FAT	GO:0007411~axon guidance	7	1.12179	0.0697672	NRCAM, BDNF, SEMA4F, FOXG1, CHL1, SLIT2, SLIT3	402	98	13588	2.41436	1	0.809531	71.052
SP_PIR_KEYWORDS	chromatin regulator	11	1.76282	0.0698217	HDAC4, BRCC3, ING2, SMARCE1, ASH1L, PRMT6, HMG20A, TLK2, USP16, BCOR, BAHD1	545	192	17854	1.87685	1	0.530204	62.5822
GOTERM_BP_FAT	GO:0031570~DNA integrity checkpoint	4	0.641026	0.0725481	BRCC3, FBXO31, BRSK1, ATM	402	33	13588	4.09709	1	0.818561	72.5002
GOTERM_BP_FAT	GO:0010941~regulation of cell death	24	3.84615	0.0726891	TRAF2, MCL1, QARS, HSPA1A, ZBTB16, HSPA1B, PRDX1, PTEN, BDNF, UTP11L, PYCARD, TRAF5, PIK3R1, DEDD2, PLAGL2, PTPN6, KLF10, TMBIM6, AARS, MECP2, HRK, ATM, DAPK1, TRADD, PSEN1	402	563	13588	1.44089	1	0.815595	72.5717
INTERPRO	IPR001478:PDZ/DHR/GLGF	9	1.44231	0.0727407	CNKSR2, CYTIP, IL16, GRIP1, PDLIM5, DLG4, RAPGEF2, GRASP, LIN7A	526	148	17763	2.05358	1	0.98263	69.5159
INTERPRO	IPR000488:Death	4	0.641026	0.0728596	TNFRSF21, TNFRSF25, TRADD, DAPK1	526	33	17763	4.09333	1	0.97864	69.5773
GOTERM_MF_FAT	GO:0046873~metal ion transmembrane transporter activity	14	2.24359	0.0728632	KCND3, TRPC4, CACNA2D1, KCNAB2, KCNB1, CACNB2, KCNJ3, KCNV1, ATP2B1, SLC11A2, KCNF1, CHRNA7, CACNA1D, SLC39A2	380	290	13288	1.68813	1	0.740928	67.3436
UP_SEQ_FEATURE	cross-link:Glycyl lysine isopeptide (Lys-Gly) (interchain with G-Cter in SUMO)	7	1.12179	0.0734008	PGR, HDAC4, SP1, UBE2K, HNRNPF, ELK1, MBD1	535	88	16021	2.38205	1	0.99996	71.7059
GOTERM_MF_FAT	GO:0022843~voltage-gated cation channel activity	8	1.28205	0.0736703	KCND3, KCNAB2, KCNB1, CACNB2, KCNF1, CACNA1D, KCNJ3, KCNV1	380	128	13288	2.18553	1	0.734771	67.7616
GOTERM_BP_FAT	GO:0006811~ion transport	29	4.64744	0.0741032	KCNAB2, SLC20A1, GABRB1, SLC38A10, CACNB2, KCNJ3, SLC11A2, ATP2B1, MCOLN3, CHRNA7, PPP3CA, SLC30A9, SLC39A2, KCND3, CACNA2D1, TRPC4, GABRA2, KCNB1, GRIA3, KCNV1, CORO1A, GRIA2, PSEN1, GRIA1, KCNF1, ATP6V0A1, CACNA1D, MPST, SLC9A1	402	712	13588	1.37673	1	0.818266	73.2799
SP_PIR_KEYWORDS	protein phosphatase	8	1.28205	0.0742284	DUSP4, PTPN6, PTPRG, PTPN2, PPP3CB, PPP3CA, PTPN20, PTEN	545	120	17854	2.18398	1	0.541881	64.9193
GOTERM_BP_FAT	GO:0051640~organelle localization	5	0.801282	0.0746431	MYO5A, SYNE1, KIF1B, PSEN1, PLXNA2	402	54	13588	3.12972	1	0.817101	73.5458
GOTERM_BP_FAT	GO:0035282~segmentation	5	0.801282	0.0746431	PSEN1, NKX3-1, ABI1, ATM, MLLT3	402	54	13588	3.12972	1	0.817101	73.5458
GOTERM_MF_FAT	GO:0017124~SH3 domain binding	6	0.961538	0.074928	SH3BP5, PTPN6, ZFP106, DOCK1, BAIAP2, DOCK4	380	79	13288	2.65583	1	0.731044	68.4031
KEGG_PATHWAY	mmu05213:Endometrial cancer	5	0.801282	0.0766749	PIK3CD, ELK1, PTEN, PIK3R1, AKT3	179	52	5738	3.08229	0.999977	0.414029	60.7028
INTERPRO	IPR013320:Concanavalin A-like lectin/glucanase, subgroup	6	0.961538	0.0775337	NPTX2, NELL1, CELSR3, USH2A, SLIT2, SLIT3	526	77	17763	2.63143	1	0.979718	71.9023
GOTERM_BP_FAT	GO:0051656~establishment of organelle localization	4	0.641026	0.077902	MYO5A, SYNE1, KIF1B, PSEN1	402	34	13588	3.97659	1	0.827326	75.0981
GOTERM_BP_FAT	GO:0051924~regulation of calcium ion transport	4	0.641026	0.077902	CACNA2D1, TRPC4, SLN, HOMER1	402	34	13588	3.97659	1	0.827326	75.0981
SP_PIR_KEYWORDS	Synaptosome	4	0.641026	0.0782586	SNPH, ABI1, ERC2, LIN7A	545	33	17854	3.97086	1	0.550907	66.9376
GOTERM_BP_FAT	GO:0048820~hair follicle maturation	3	0.480769	0.0794039	MYO5A, PSEN1, PTGS2	402	16	13588	6.33769	1	0.83	75.7843
GOTERM_BP_FAT	GO:0051402~neuron apoptosis	3	0.480769	0.0794039	TNFRSF21, PSEN1, ATM	402	16	13588	6.33769	1	0.83	75.7843
GOTERM_CC_FAT	GO:0044430~cytoskeletal part	31	4.96795	0.0798645	MYO5A, ALS2, PRPH, SDCCAG8, UTRN, NCS1, UPP2, PTPN20, KRTAP5-3, CAPZB, STAU2, HOOK1, DYNLL1, TMSB15B1, DLG4, CHRNA7, TMSB15B2, MAP2K5, KIF2A, DLGAP1, SMEK2, GRIA3, HOMER1, GRM1, ATM, KRT73, HDAC4, KIF1B, GRIA2, INVS, PSEN1, GRIA1	372	774	12504	1.34625	1	0.544259	67.4936
GOTERM_MF_FAT	GO:0016791~phosphatase activity	12	1.92308	0.080353	DUSP4, PTPN6, SBF2, PTPRG, PTPN2, NT5C2, 9630033F20RIK, PPP3CB, PPP3CA, PTPN20, LPIN2, PTEN	380	238	13288	1.76311	1	0.746959	71.0359
UP_SEQ_FEATURE	compositionally biased region:Poly-Glu	19	3.04487	0.0803567	CNKSR2, PRPF31, MCL1, 2410066E13RIK, SMEK2, SH3BP5, GRM5, HDAC4, TRP53BP1, TEX2, MFAP1A, MLEC, SNPH, PRDM10, ISY1, NEUROD2, FRAT2, NEUROD6, CACNA1D	535	376	16021	1.51322	1	0.999963	75.0254
SP_PIR_KEYWORDS	endosome	11	1.76282	0.0818458	CYTIP, CHMP5, TSG101, NSG2, PLIN3, MMD, VPS37A, VPS24, CLVS1, APPL2, ZNRF2	545	198	17854	1.81998	1	0.557301	68.643
SP_PIR_KEYWORDS	dna repair	10	1.60256	0.0830286	RAD23B, TRP53BP1, BRCC3, CINP, PRMT6, SMC5, TREX1, ATRIP, ATM, SETX	545	173	17854	1.89362	1	0.552549	69.1872
GOTERM_MF_FAT	GO:0005131~growth hormone receptor binding	2	0.320513	0.0831547	SOCS2, JAK1	380	3	13288	23.3123	1	0.750121	72.3142
GOTERM_BP_FAT	GO:0021549~cerebellum development	4	0.641026	0.0834235	DAB1, AGTPBP1, AARS, MECP2	402	35	13588	3.86297	1	0.842038	77.5342
GOTERM_BP_FAT	GO:0006974~response to DNA damage stimulus	14	2.24359	0.0844257	RAD23B, BRCC3, SMC5, TREX1, HSPA1A, HSPA1B, BRSK1, ATM, SETX, TRP53BP1, PSEN1, PRMT6, FBXO31, TLK2, ATRIP	402	287	13588	1.64883	1	0.842524	77.9516
UP_SEQ_FEATURE	domain:EGF-like 4	5	0.801282	0.0846214	MATN4, NELL1, DLK2, SLIT2, SLIT3	535	50	16021	2.99458	1	0.999951	76.8757
INTERPRO	IPR006209:EGF	8	1.28205	0.085492	MATN4, NRG3, PTGS2, CELSR3, DLK2, SLIT2, VLDLR, SLIT3	526	128	17763	2.11062	1	0.983608	75.4824
INTERPRO	IPR004113:FAD-linked oxidase, C-terminal	2	0.320513	0.0860773	D2HGDH, AGPS	526	3	17763	22.5133	1	0.980788	75.7281
INTERPRO	IPR009543:Vacuolar protein sorting-associated protein	2	0.320513	0.0860773	VPS13C, VPS13A	526	3	17763	22.5133	1	0.980788	75.7281
GOTERM_CC_FAT	GO:0009898~internal side of plasma membrane	14	2.24359	0.0861284	ARFGAP2, RAB39B, SOCS7, CRCP, CACNB2, STOM, DIRAS1, PACSIN3, PLIN3, DLG4, GNG2, RAB26, GYK, RASD1	372	287	12504	1.63965	1	0.562214	70.3573
GOTERM_CC_FAT	GO:0009331~glycerol-3-phosphate dehydrogenase complex	2	0.320513	0.0864033	GPD2, GPD1	372	3	12504	22.4086	1	0.553254	70.4775
GOTERM_CC_FAT	GO:0005783~endoplasmic reticulum	33	5.28846	0.0867455	JPH3, PTGS2, NAPG, GRIP1, UBE2G2, ATL3, UNC93B1, UBQLN4, RIC3, STAU2, PIGK, FBXW7, BDNF, SLN, SHISA3, RNF128, SEC22B, ASPH, ELOVL6, ACSL4, HSD17B7, TOR1AIP2, CACNA2D1, SPTLC1, GUSB, SEZ6L, LPCAT2, LPCAT3, PSEN1, GRIA1, MLEC, MBOAT2, AHCYL1	372	838	12504	1.32366	1	0.544899	70.6264
GOTERM_BP_FAT	GO:0043583~ear development	7	1.12179	0.0872068	DDR1, BDNF, MCOLN3, FGF9, FOXG1, USH2A, FZD6	402	104	13588	2.27507	1	0.849215	79.0719
GOTERM_MF_FAT	GO:0005088~Ras guanyl-nucleotide exchange factor activity	6	0.961538	0.0882706	ALS2, ABR, TRIO, RGNEF, RAPGEF2, KALRN	380	83	13288	2.52784	1	0.762672	74.5135
GOTERM_BP_FAT	GO:0016079~synaptic vesicle exocytosis	3	0.480769	0.088291	PSEN1, TRIM9, STX4A	402	17	13588	5.96488	1	0.849887	79.4939
SMART	SM00013:LRRNT	7	1.12179	0.0883386	SLITRK2, FLRT3, LRRC33, LGI1, LRFN5, SLIT2, SLIT3	304	93	9131	2.26079	1	0.930672	68.6862
GOTERM_BP_FAT	GO:0010627~regulation of protein kinase cascade	9	1.44231	0.0885131	TRAF2, PTPN6, SOCS2, FGF9, ADRA1A, PTEN, GRM1, PRDX1, TRADD	402	155	13588	1.96264	1	0.847647	79.5794
SMART	SM00150:SPEC	4	0.641026	0.0885662	SYNE1, UTRN, TRIO, KALRN	304	32	9131	3.75452	1	0.903826	68.7843
PIR_SUPERFAMILY	PIRSF036317:slit protein	2	0.320513	0.0890435	SLIT2, SLIT3	250	3	8136	21.696	1	0.999999	71.2232
PIR_SUPERFAMILY	PIRSF028901:membrane-bound O-acyltransferase, YOR175C type	2	0.320513	0.0890435	MBOAT2, LPCAT3	250	3	8136	21.696	1	0.999999	71.2232
PIR_SUPERFAMILY	PIRSF000911:serine/threonine protein phosphatase 2B catalytic subunit	2	0.320513	0.0890435	PPP3CB, PPP3CA	250	3	8136	21.696	1	0.999999	71.2232
INTERPRO	IPR001496:SOCS protein, C-terminal	4	0.641026	0.0894749	SOCS2, WSB2, ASB12, SOCS7	526	36	17763	3.75222	1	0.98049	77.1093
INTERPRO	IPR017936:Thioredoxin-like	4	0.641026	0.0894749	GLRX3, DNAJC16, GM12669, PRDX3, PRDX1	526	36	17763	3.75222	1	0.98049	77.1093
UP_SEQ_FEATURE	domain:Fibronectin type-III	5	0.801282	0.0895314	PTPRG, TRIM9, CRLF3, LRFN5, KALRN	535	51	16021	2.93586	1	0.999944	78.8463
GOTERM_BP_FAT	GO:0006633~fatty acid biosynthetic process	6	0.961538	0.0910444	MYO5A, ALOXE3, PTGS2, MCAT, PRKAG2, ELOVL6	402	81	13588	2.50378	1	0.853105	80.53
GOTERM_BP_FAT	GO:0032870~cellular response to hormone stimulus	5	0.801282	0.0915822	ZFP106, PTPN2, SOCS7, PIK3R1, AKT3	402	58	13588	2.91388	1	0.851955	80.7265
GOTERM_MF_FAT	GO:0019209~kinase activator activity	3	0.480769	0.091968	ALS2, FGF13, ABI1	380	18	13288	5.82807	1	0.768695	76.0004
GOTERM_MF_FAT	GO:0005234~extracellular-glutamate-gated ion channel activity	3	0.480769	0.091968	GRIA2, GRIA1, GRIA3	380	18	13288	5.82807	1	0.768695	76.0004
GOTERM_MF_FAT	GO:0004970~ionotropic glutamate receptor activity	3	0.480769	0.091968	GRIA2, GRIA1, GRIA3	380	18	13288	5.82807	1	0.768695	76.0004
GOTERM_BP_FAT	GO:0001503~ossification	7	1.12179	0.0935058	HDAC4, THRA, PTGS2, SP1, FGF9, KLF10, CHRD	402	106	13588	2.23214	1	0.855239	81.4143
INTERPRO	IPR012335:Thioredoxin fold	7	1.12179	0.094206	GLRX3, DNAJC16, GDAP1, GM12669, TXNDC9, PRDX3, PRDX1, GLRX2	526	106	17763	2.23009	1	0.98136	78.9103
GOTERM_BP_FAT	GO:0033555~multicellular organismal response to stress	4	0.641026	0.0949493	ALS2, BDNF, MECP2, NEUROD2	402	37	13588	3.65416	1	0.856928	81.9151
SMART	SM00005:DEATH	4	0.641026	0.0951425	TNFRSF21, TNFRSF25, TRADD, DAPK1	304	33	9131	3.64075	1	0.893961	71.497
INTERPRO	IPR003091:Voltage-dependent potassium channel	4	0.641026	0.0953354	KCND3, KCNB1, KCNF1, KCNV1	526	37	17763	3.65081	1	0.97917	79.3201
INTERPRO	IPR002290:Serine/threonine protein kinase	13	2.08333	0.0954349	PRPF4B, TRIO, MYLK2, MAPK11, BRSK1, DAPK1, CSNK2A2, NEK9, TLK2, AKT3, NEK7, MAP2K5, KALRN	526	265	17763	1.65664	1	0.975925	79.3559
BIOCARTA	m_agrPathway:Agrin in Postsynaptic Differentiation	4	0.641026	0.0954973	NRG3, SP1, JUN, UTRN	51	26	1171	3.53243	0.999999	0.990443	69.3574
SMART	SM00233:PH	14	2.24359	0.0955161	CNKSR2, ALS2, ABR, TRIO, RGNEF, APPL2, ARHGAP26, MPRIP, KIF1B, TEX2, SBF2, AKT3, PHLDA2, KALRN	304	261	9131	1.61114	1	0.868388	71.6444
GOTERM_BP_FAT	GO:0032868~response to insulin stimulus	5	0.801282	0.0960804	ZFP106, PTPN2, SOCS7, PIK3R1, AKT3	402	59	13588	2.86449	1	0.857625	82.2987
GOTERM_BP_FAT	GO:0001822~kidney development	7	1.12179	0.0967449	BDNF, INVS, PYGO1, PBX1, ZBTB16, GREM1, SLIT2	402	107	13588	2.21128	1	0.856902	82.5204
GOTERM_BP_FAT	GO:0042439~ethanolamine and derivative metabolic process	3	0.480769	0.0974559	CHKA, MECP2, LPCAT2	402	18	13588	5.6335	1	0.856332	82.7548
GOTERM_BP_FAT	GO:0007274~neuromuscular synaptic transmission	3	0.480769	0.0974559	EGR3, KIF1B, MYLK2	402	18	13588	5.6335	1	0.856332	82.7548
INTERPRO	IPR015683:Glutamate receptor-related	3	0.480769	0.097729	GRIA2, GRIA1, GRIA3	526	18	17763	5.62833	1	0.974762	80.1642
INTERPRO	IPR001508:NMDA receptor	3	0.480769	0.097729	GRIA2, GRIA1, GRIA3	526	18	17763	5.62833	1	0.974762	80.1642
INTERPRO	IPR019594:Glutamate receptor, L-glutamate/glycine-binding	3	0.480769	0.097729	GRIA2, GRIA1, GRIA3	526	18	17763	5.62833	1	0.974762	80.1642
INTERPRO	IPR001320:Ionotropic glutamate receptor	3	0.480769	0.097729	GRIA2, GRIA1, GRIA3	526	18	17763	5.62833	1	0.974762	80.1642
GOTERM_CC_FAT	GO:0034702~ion channel complex	9	1.44231	0.0983533	KCND3, GABRA2, KCNB1, GABRB1, CACNB2, KCNF1, CHRNA7, CACNA1D, KCNV1	372	158	12504	1.91466	1	0.582962	75.2853
INTERPRO	IPR000483:Cysteine-rich flanking region, C-terminal	6	0.961538	0.0991412	SLITRK2, FLRT3, LGI1, LRFN5, SLIT2, SLIT3	526	83	17763	2.4412	1	0.972732	80.647
UP_SEQ_FEATURE	short sequence motif:Selectivity filter	5	0.801282	0.0997499	KCND3, KCNB1, KCNF1, KCNJ3, KCNV1	535	53	16021	2.82507	1	0.999964	82.4529

## Sheet: Turquoise
Category	Term	Count	%	PValue	Genes	List Total	Pop Hits	Pop Total	Fold Enrichment	Bonferroni	Benjamini	FDR
BIOCARTA	m_igf1mtorpathway:Skeletal muscle hypertrophy is regulated via AKT/mTOR pathway	7	0.449006	0.00507062	EIF2S1, EIF2S2, IGF1, PIK3CA, RPS6KB1, PTEN, PIK3R1	102	20	1171	4.01814	0.641874	0.641874	6.18266
BIOCARTA	m_hdacPathway:Control of skeletal myogenesis by HDAC & calcium/calmodulin-dependent kinase (CaMK)	6	0.384862	0.0189103	MEF2A, MAPK14, CABIN1, IGF1, PIK3R1, CALM1	102	19	1171	3.62539	0.978857	0.854595	21.3121
BIOCARTA	m_egfPathway:EGF Signaling Pathway	7	0.449006	0.0279163	EGFR, CSNK2A1, ELK1, JAK1, PIK3CA, PIK3R1, RASA1	102	28	1171	2.8701	0.996718	0.85139	29.9147
BIOCARTA	m_vdrPathway:Control of Gene Expression by Vitamin D Receptor	7	0.449006	0.0279163	BAZ1B, RXRA, SMARCC1, CREBBP, SUPT16H, NCOR1, MED1	102	28	1171	2.8701	0.996718	0.85139	29.9147
BIOCARTA	m_igf1Pathway:IGF-1 Signaling Pathway	6	0.384862	0.0288092	CSNK2A1, ELK1, IGF1, PIK3R1, RASA1, PTPN11	102	21	1171	3.28011	0.997274	0.771503	30.7186
BIOCARTA	m_ppargPathway:Role of PPAR-gamma Coactivators in Obesity and Thermogenesis	4	0.256575	0.0477972	RXRA, CREBBP, PPARGC1A, MED1	102	10	1171	4.59216	0.999949	0.861748	45.9293
BIOCARTA	m_Par1Pathway:Thrombin signaling and protease-activated receptors	5	0.320718	0.0516693	GNA13, MAP3K7, GNAI1, PLCB1, PIK3R1	102	17	1171	3.37659	0.999978	0.832385	48.6258
BIOCARTA	m_gsk3Pathway:Inactivation of Gsk3 by AKT causes accumulation of b-catenin in Alveolar Macrophages	6	0.384862	0.0571077	CCND1, GNAI1, PIK3CA, TLR4, PIK3R1, APC	102	25	1171	2.75529	0.999993	0.816748	52.2045
BIOCARTA	m_Lis1Pathway:Lissencephaly gene (LIS1) in neuronal migration and development	4	0.256575	0.0617025	CDK5R1, CSNK2A1, CLIP1, PAFAH1B1	102	11	1171	4.17469	0.999997	0.799738	55.0476
BIOCARTA	m_eif2Pathway:Regulation of eIF2	4	0.256575	0.0617025	EIF2AK1, EIF2S1, EIF2S2, EIF5	102	11	1171	4.17469	0.999997	0.799738	55.0476
BIOCARTA	m_telPathway:Telomeres, Telomerase, Cellular Aging, and Immortality	5	0.320718	0.0621642	EGFR, PRKCA, HSP90AA1, XRCC6, TNKS	102	18	1171	3.189	0.999998	0.763189	55.3245
BIOCARTA	m_eif4Pathway:Regulation of eIF4e and p70 S6 Kinase	5	0.320718	0.0862422	MAPK14, PIK3CA, RPS6KB1, PTEN, PIK3R1	102	20	1171	2.8701	1	0.838271	67.7702
COG_ONTOLOGY	Intracellular trafficking and secretion	10	0.641437	0.00693287	SCFD1, SEC22A, STXBP1, VPS13A, VPS13B, KPNA2, KPNB1, VPS33A, TNPO1, KPNA1	178	41	2040	2.79529	0.226948	0.226948	6.0557
GOTERM_BP_FAT	GO:0045449~regulation of transcription	229	14.6889	4.31901e-11	MEF2A, NAA15, HIRA, BBX, RORB, MED20, TAF7L, ZFP91, MAMSTR, SIN3A, ZFP93, IKBKAP, RCOR1, RXRA, ZFP629, MED13, PPARGC1A, PPARGC1B, MED19, ZFP826, MTF1, RFC1, BAZ1B, VEGFA, SMARCAL1, LRCH4, SUV420H1, FUS, GPBP1L1, ZFP458, ZFP454, ZFP451, PBRM1, SUPT7L, BCOR, LHX9, TCF25, HNRNPAB, ASXL2, DNMT3A, IKZF2, KLF12, CREBBP, MAML2, ASXL1, ZFP97, ZFP449, ZFP445, ZFP606, SFMBT1, SFMBT2, ZBTB43, NOTCH1, CSRNP3…	935	2227	13588	1.49437	1.17261e-07	1.17261e-07	7.69066e-08
GOTERM_BP_FAT	GO:0006350~transcription	190	12.1873	1.18474e-10	MEF2A, NAA15, HIRA, BBX, RORB, PDX1, MED20, CNOT4, PNN, TAF7L, ESF1, ZFP784, ZFP91, MAMSTR, MLL5, SIN3A, ZFP93, SMARCD2, TGS1, ZFP882, MLL3, GABPB2, MYST3, IKBKAP, RXRA, RCOR1, ZFP629, MED13, PPARGC1A, PPARGC1B, SLTM, MED19, PA2G4, KDM2A, MTF1, TIMELESS, RFC1, BAZ1B, ZFP263, MGA, DNTTIP2, XRN2, SUV420H1, GPBP1L1, SOX5, SOX4, ELK1, ZFP458, SOX9, NR2C2, MED12L, ZFP454, ZFP451, 6330416L07RIK, TEF, P…	935	1772	13588	1.55824	3.21656e-07	1.60828e-07	2.10961e-07
GOTERM_BP_FAT	GO:0051276~chromosome organization	61	3.91276	1.03085e-08	ARID4A, UTY, EZH1, ARID4B, HIRA, INO80, CBX5, MLL5, SMARCD2, HIST3H2A, TLK1, ACIN1, KDM5A, MLL3, KDM5C, ZW10, BRD8, MYST3, H1F0, TBL1XR1, RBBP4, BRCC3, AIFM2, RCOR1, UBE2B, NCAPD3, TNKS2, EYA3, EYA4, HIST1H1T, BAZ1B, KDM2A, BPTF, HIST2H2BE, SMARCAL1, RNF20, SUV420H1, CHD8, HJURP, CENPA, PBRM1, RNF168, CHD6, BCOR, BAZ2A, MYSM1, CHD4, APC, SETDB1, DNMT3A, SMG6, CREBBP, 9130404D08RIK, MIS12, SMARCC1…	935	404	13588	2.19428	2.79873e-05	9.32919e-06	1.83559e-05
GOTERM_BP_FAT	GO:0006325~chromatin organization	51	3.27133	2.05135e-08	ARID4A, UTY, EZH1, ARID4B, HIRA, INO80, CBX5, MLL5, SMARCD2, HIST3H2A, TLK1, KDM5A, MLL3, KDM5C, BRD8, MYST3, H1F0, TBL1XR1, BRCC3, RBBP4, RCOR1, UBE2B, EYA3, EYA4, HIST1H1T, BAZ1B, KDM2A, BPTF, HIST2H2BE, SMARCAL1, RNF20, SUV420H1, CHD8, HJURP, CENPA, PBRM1, RNF168, CHD6, BCOR, BAZ2A, CHD4, MYSM1, SETDB1, DNMT3A, CREBBP, SMARCC1, HIST1H3B, SETD8, KDM4A, NCOR1, HIST1H3H	935	315	13588	2.3529	5.56927e-05	1.39235e-05	3.65275e-05
GOTERM_BP_FAT	GO:0016568~chromatin modification	40	2.56575	2.56562e-07	UTY, EZH1, HIRA, INO80, CHD8, MLL5, SMARCD2, HJURP, PBRM1, TLK1, RNF168, MLL3, KDM5A, BCOR, BAZ2A, MYSM1, KDM5C, CHD4, BRD8, MYST3, SETDB1, TBL1XR1, DNMT3A, BRCC3, RBBP4, RCOR1, CREBBP, UBE2B, EYA3, EYA4, BAZ1B, BPTF, KDM2A, SMARCC1, SMARCAL1, SETD8, KDM4A, NCOR1, RNF20, SUV420H1	935	236	13588	2.46316	0.000696323	0.000139303	0.000456847
GOTERM_BP_FAT	GO:0006974~response to DNA damage stimulus	42	2.69403	6.11509e-06	KIF22, RAD23B, NEK1, XRCC6, CHEK1, INTS3, RRM2B, ANKRD17, PMS2, TLK1, RNF168, RAD51L3, CCNO, APC, FANCC, BRCC3, RAD51AP1, NEIL3, USP1, RINT1, SMG1, CEP63, UBE2B, JMY, PTPN11, ATRX, EYA3, EYA4, XPA, CCND1, BAZ1B, TIMELESS, HIPK1, RIF1, SFPQ, MAPK14, SUPT16H, TDG, SMC1A, ALKBH2, XRN2, REV3L	935	287	13588	2.12672	0.0164655	0.00276326	0.0108883
GOTERM_BP_FAT	GO:0033365~protein localization in organelle	21	1.34702	7.73617e-06	BBS4, GRPEL2, SRP54A, HTT, SRP54B, SNUPN, SRP54C, PAX6, DNHD1, FGF10, TOMM40, SIX2, IPO8, NUP214, GCKR, SPNB2, NOP58, TPR, XPO7, TNPO1, KPNB1, KPNA2, KPNA1	935	97	13588	3.14624	0.0207847	0.00299604	0.0137745
GOTERM_BP_FAT	GO:0006606~protein import into nucleus	15	0.962155	1.81813e-05	HTT, SNUPN, FGF10, SIX2, IPO8, GCKR, NUP214, SPNB2, NOP58, TPR, XPO7, KPNB1, KPNA2, TNPO1, KPNA1	935	56	13588	3.89267	0.0481642	0.00615135	0.0323697
GOTERM_BP_FAT	GO:0051170~nuclear import	15	0.962155	2.79232e-05	HTT, SNUPN, FGF10, SIX2, IPO8, GCKR, NUP214, SPNB2, NOP58, TPR, XPO7, KPNB1, KPNA2, TNPO1, KPNA1	935	58	13588	3.75844	0.07301	0.00838823	0.0497098
GOTERM_BP_FAT	GO:0017038~protein import	18	1.15459	3.4034e-05	GRPEL2, HTT, SNUPN, DNHD1, FGF10, TOMM40, SIX2, IPO8, NUP214, GCKR, SPNB2, NOP58, TPR, XPO7, TNPO1, KPNB1, KPNA2, KPNA1	935	82	13588	3.19009	0.0882633	0.00919784	0.0605855
GOTERM_BP_FAT	GO:0046907~intracellular transport	53	3.39962	4.895e-05	COPA, GRPEL2, SPG7, ENAH, CLTB, CHMP5, VPS54, FGF10, HOOK3, RANBP3, GLE1, RANBP2, TPR, KPNB1, ZW10, NUP133, KIF5B, SRP54A, SRP54B, SNUPN, SRP54C, SIX2, IPO8, RPH3A, VTI1A, KIF1B, CAMK1, CUX1, DST, KPNA2, KPNA1, NAPG, STAM2, LRBA, NUP214, GCKR, STX17, SPNB2, CHM, PAFAH1B1, APPBP2, TNPO1, RHOBTB3, ASPSCR1, HTT, DNHD1, TOMM40, IGH-6, YWHAG, COG5, UCP3, RSRC1, RHOT1, NOP58, XPO7	935	431	13588	1.78707	0.12445	0.0120094	0.0871272
GOTERM_BP_FAT	GO:0034504~protein localization in nucleus	15	0.962155	5.10792e-05	HTT, SNUPN, FGF10, SIX2, IPO8, GCKR, NUP214, SPNB2, NOP58, TPR, XPO7, KPNB1, KPNA2, TNPO1, KPNA1	935	61	13588	3.5736	0.129497	0.0114904	0.0909154
GOTERM_BP_FAT	GO:0006913~nucleocytoplasmic transport	19	1.21873	8.20545e-05	NUP133, HTT, SNUPN, FGF10, SIX2, IPO8, GCKR, NUP214, RSRC1, SPNB2, CAMK1, NOP58, GLE1, TPR, XPO7, TNPO1, KPNB1, KPNA2, KPNA1	935	96	13588	2.87625	0.199715	0.0169915	0.14601
GOTERM_BP_FAT	GO:0010604~positive regulation of macromolecule metabolic process	70	4.49006	8.29778e-05	MEF2A, ELF1, PAX6, TLR3, RORB, TLR4, PAX3, PDX1, ZBTB38, ZFP91, MLL5, PIWIL2, MKL2, LTB, SPN, ALX1, MYST3, PRKCA, BRCC3, RXRA, SOX11, ESR1, SIX2, MED13, UBE2B, PPARGC1A, PPARGC1B, EYA3, INHBA, MTF1, VEGFA, CLOCK, MED1, FUS, UBE3A, SOX5, BMPR2, SOX4, ELK1, SOX9, TCF7L2, CHD8, TEF, RNF168, POU3F2, TRAF6, ETV4, MYSM1, APC, HNRNPAB, IKZF2, KLF12, CREBBP, MAML2, GSX1, IGF1, CREB5, IGH-6, RICTOR, ATF4,…	935	633	13588	1.60708	0.201719	0.0159636	0.147652
GOTERM_BP_FAT	GO:0051169~nuclear transport	19	1.21873	0.000108348	NUP133, HTT, SNUPN, FGF10, SIX2, IPO8, GCKR, NUP214, RSRC1, SPNB2, CAMK1, NOP58, GLE1, TPR, XPO7, TNPO1, KPNB1, KPNA2, KPNA1	935	98	13588	2.81755	0.254858	0.019421	0.192755
GOTERM_BP_FAT	GO:0040007~growth	29	1.86017	0.000134976	UBE3A, VPS54, FGF10, IL7R, SOX9, PTEN, ZFP91, SLC1A2, SAFB, ANKRD11, MTAP7, DCLK1, CYP19A1, SETDB1, ARID5B, RXRA, ESR1, IGF1, PCDH15, TNKS2, PTPN11, INHBA, ZFP826, ACVR2B, NOTCH1, CNTF, TGFBR3, XRN2, ADD1, MED1	935	193	13588	2.18366	0.306833	0.0226449	0.240073
GOTERM_BP_FAT	GO:0033554~cellular response to stress	48	3.0789	0.000263766	KIF22, RAD23B, NEK1, XRCC6, CHEK1, INTS3, RRM2B, OS9, ANKRD17, COL4A3BP, PCSK9, PMS2, TLK1, RNF168, RAD51L3, CCNO, APC, FANCC, BRCC3, RAD51AP1, NEIL3, USP1, RINT1, SMG1, CEP63, UBE2B, JMY, PTPN11, ATRX, EYA3, EYA4, XPA, CCND1, BAZ1B, RIF1, TIMELESS, HIPK1, EIF2S1, MAPK14, SFPQ, MAPK8IP2, SUPT16H, TDG, MAPK8IP3, SMC1A, ALKBH2, XRN2, REV3L	935	404	13588	1.72665	0.511403	0.0412553	0.468635
GOTERM_BP_FAT	GO:0050678~regulation of epithelial cell proliferation	14	0.898012	0.000293843	EGFR, STK11, PAX6, FGF10, PTEN, NOTCH1, CDKN1B, PHB2, VEGFA, TGFBR3, TBX18, ETV4, MED1, APC	935	63	13588	3.22947	0.549726	0.0433597	0.521942
GOTERM_BP_FAT	GO:0008104~protein localization	77	4.93906	0.000425611	COPA, GRPEL2, CLTB, CHMP5, VPS54, PAX6, FGF10, VPS33A, OS9, HOOK3, KIF13A, NRCAM, SIN3A, ANK2, RANBP3, RAB6B, VPS13A, RANBP2, GLE1, VPS13B, TPR, KPNB1, DHCR24, ZW10, NUP133, RAB39B, SRP54A, SNUPN, SRP54B, RINT1, SRP54C, STXBP1, SIX2, IPO8, RPH3A, VTI1A, RAB14, KPNA2, KPNA1, AKAP4, SNAP29, BBS4, SDAD1, NAPG, STAM2, LRBA, NUP93, RDX, MIA3, GCKR, NUP214, NUP210, STX17, SPNB2, SEC22A, CHM, PALM2, SEC…	935	753	13588	1.48607	0.685188	0.0590173	0.755161
GOTERM_BP_FAT	GO:0010941~regulation of cell death	61	3.91276	0.000438355	RBM5, PTEN, MAP3K7, BAG4, ZFP91, SIN3A, ANK2, BAG3, PIK3CA, DNAJC5, DLG5, LTB, WWOX, SPN, DHCR24, PRKCA, NMNAT3, NUDT2, TFPT, AIFM2, MADD, CYCS, ESR1, UBE2B, STK3, JMY, XPA, HIPK1, VEGFA, NAIF1, PSME3, BCLAF1, CDK5R1, XIAP, STK17B, RRAGA, ZBTB16, RRM2B, ITM2B, SOX9, ZC3H8, CHD8, UTP11L, PCSK9, TRP53INP1, TRAF6, RASA1, PIK3R1, APC, STAMBP, IL2RA, TM2D1, HTT, IGF1, SAP30BP, TAX1BP1, NOTCH1, PSMG2, …	935	563	13588	1.57458	0.695899	0.057783	0.777689
GOTERM_BP_FAT	GO:0051252~regulation of RNA metabolic process	135	8.6594	0.000519702	MEF2A, HIRA, RBM5, RORB, PDX1, MED20, CBX5, MLL5, RNF141, ZFP93, SIN3A, MLL3, ZFP882, IKBKAP, RXRA, SIX2, MED13, PPARGC1A, PPARGC1B, MED19, ZFP826, PA2G4, TIMELESS, MTF1, VEGFA, SMARCAL1, ZFP263, MGA, FUS, SOX5, SOX4, ELK1, SOX9, ZFP458, NR2C2, MED12L, ZFP454, 6330416L07RIK, TEF, BCOR, LHX9, TCF25, HNRNPAB, DNMT3A, IKZF2, ZFP248, KLF12, GSX1, MAML2, CREBBP, ZFP97, ZFP449, 2210012G02RIK, ZFP606, Z…	935	1488	13588	1.31848	0.756188	0.0649988	0.921378
GOTERM_BP_FAT	GO:0010942~positive regulation of cell death	33	2.11674	0.000556824	CDK5R1, BCLAF1, STK17B, RBM5, RRAGA, RRM2B, ZBTB16, ITM2B, PTEN, ZC3H8, UTP11L, TRP53INP1, PCSK9, TRAF6, LTB, SPN, WWOX, APC, PRKCA, NUDT2, IL2RA, AIFM2, TM2D1, TFPT, CYCS, SAP30BP, STK3, JMY, XPA, NOTCH1, HIPK1, CSRNP3, NAIF1	935	252	13588	1.90308	0.779575	0.0664272	0.986885
GOTERM_BP_FAT	GO:0006357~regulation of transcription from RNA polymerase II promoter	65	4.16934	0.000563667	ELF1, ELF2, PAX6, PAX3, PDX1, MED20, ZBTB38, SIN3A, MKL2, ALX1, IKBKAP, RXRA, SOX11, SIX2, IRF2BP2, MED13, MBD2, PPARGC1A, PPARGC1B, JMY, MED19, INHBA, BRWD1, MTF1, HIPK1, BPTF, TIMELESS, SMARCAL1, VEGFA, MDM4, CUX1, CLOCK, MED1, FUS, UBE3A, SOX5, SOX4, ELK1, SOX9, TCF7L2, MED12L, MSX3, CHD8, TEF, POU3F2, BCOR, TCF25, DNMT3A, ZBTB7A, IKZF2, KLF12, CREBBP, MAML2, GSX1, IGF1, ATF4, NOTCH1, CSRNP3, …	935	616	13588	1.53347	0.783635	0.0643895	0.998956
GOTERM_BP_FAT	GO:0006355~regulation of transcription, DNA-dependent	133	8.53111	0.000582895	MEF2A, HIRA, RORB, PDX1, MED20, CBX5, MLL5, RNF141, ZFP93, SIN3A, MLL3, ZFP882, IKBKAP, RXRA, SIX2, MED13, PPARGC1A, PPARGC1B, MED19, ZFP826, PA2G4, TIMELESS, MTF1, VEGFA, SMARCAL1, ZFP263, MGA, FUS, SOX5, SOX4, ELK1, SOX9, ZFP458, NR2C2, MED12L, ZFP454, 6330416L07RIK, TEF, BCOR, LHX9, TCF25, HNRNPAB, DNMT3A, IKZF2, ZFP248, KLF12, GSX1, MAML2, CREBBP, ZFP97, ZFP449, 2210012G02RIK, ZFP606, ZFP445,…	935	1465	13588	1.31934	0.794647	0.063831	1.03287
GOTERM_BP_FAT	GO:0009057~macromolecule catabolic process	68	4.36177	0.000615133	SPG7, DZIP3, PPP2R5C, RNF216, VPRBP, CDC16, DNASE1L2, RLIM, SENP7, OS9, CNOT4, ZYG11B, CUL5, WWP2, RANBP2, DHCR24, TBL1XR1, BRCC3, USP1, ENC1, SOCS6, GAN, UBE2H, HERC2, HERC1, UBE2B, DCUN1D2, KDM2A, BACE2, YME1L1, ANAPC7, RNF20, EIF2C3, XRN2, ASB7, USP7, RAD23B, OTUD5, USP8, XIAP, UBE3A, CBLL1, FEM1A, WDYHV1, PSMB1, EIF3E, FBXW2, PCSK9, USP37, RNF168, USP36, FBXO3, TRAF6, MYSM1, TRIP12, STAMBP, S…	935	654	13588	1.51104	0.811866	0.0646402	1.08969
GOTERM_BP_FAT	GO:0006281~DNA repair	30	1.92431	0.000627413	KIF22, RAD23B, XRCC6, CHEK1, RRM2B, INTS3, ANKRD17, PMS2, RNF168, RAD51L3, CCNO, FANCC, BRCC3, RAD51AP1, NEIL3, USP1, SMG1, UBE2B, JMY, ATRX, EYA3, EYA4, XPA, SFPQ, SUPT16H, TDG, SMC1A, ALKBH2, XRN2, REV3L	935	222	13588	1.96387	0.818039	0.0634356	1.11134
GOTERM_BP_FAT	GO:0043067~regulation of programmed cell death	60	3.84862	0.000648347	RBM5, PTEN, MAP3K7, BAG4, ZFP91, SIN3A, ANK2, BAG3, PIK3CA, DNAJC5, DLG5, LTB, WWOX, SPN, DHCR24, PRKCA, NMNAT3, NUDT2, TFPT, AIFM2, MADD, CYCS, ESR1, UBE2B, STK3, JMY, XPA, HIPK1, VEGFA, NAIF1, PSME3, BCLAF1, CDK5R1, XIAP, STK17B, ZBTB16, RRM2B, ITM2B, SOX9, ZC3H8, CHD8, UTP11L, PCSK9, TRP53INP1, TRAF6, RASA1, PIK3R1, APC, STAMBP, IL2RA, TM2D1, HTT, IGF1, SAP30BP, TAX1BP1, NOTCH1, PSMG2, CDKN1B,…	935	560	13588	1.55707	0.828098	0.0631349	1.14821
GOTERM_BP_FAT	GO:0006259~DNA metabolic process	48	3.0789	0.000663329	KIF22, RAD23B, XRCC6, CHEK1, RRM2B, INTS3, DNASE1L2, ANKRD17, TOP1, MLL5, SIN3A, PIWIL2, PMS2, RNF168, RAD51L3, CCNO, BAZ2A, FANCC, DNMT3A, BRCC3, RAD51AP1, RBBP4, SMG6, GINS3, NEIL3, USP1, SMG1, UBE2B, KCNQ1OT1, JMY, TNKS2, POLD3, ATRX, EYA3, EYA4, XPA, RFC1, HELB, SFPQ, SMARCAL1, SUPT16H, TDG, SMC1A, ALKBH2, XRN2, REV3L, REPIN1, MED1	935	421	13588	1.65693	0.834955	0.0623144	1.1746
GOTERM_BP_FAT	GO:0000075~cell cycle checkpoint	12	0.769724	0.000678206	CCND1, BRCC3, PSMG2, MAPK14, RINT1, CHEK1, INTS3, CEP63, SMC1A, APC, ZW10, PTPN11	935	52	13588	3.35368	0.841493	0.0615406	1.20079
GOTERM_BP_FAT	GO:0051173~positive regulation of nitrogen compound metabolic process	57	3.65619	0.000698084	HSP90AB1, MEF2A, ELF1, PAX6, RORB, TLR4, PDX1, PAX3, ZBTB38, MLL5, MKL2, ALX1, MYST3, HSP90AA1, BRCC3, RXRA, SOX11, SIX2, MED13, UBE2B, PPARGC1A, PPARGC1B, EYA3, INHBA, MTF1, VEGFA, CLOCK, MED1, FUS, UBE3A, SOX5, SOX4, ELK1, SOX9, TCF7L2, CHD8, TEF, POU3F2, RNF168, ETV4, MYSM1, HNRNPAB, IKZF2, KLF12, CREBBP, MAML2, GSX1, IGF1, CREB5, ATF4, NOTCH1, CSRNP3, MAPK14, ATXN7, THRAP3, EBF1, PBX1	935	526	13588	1.57483	0.849826	0.0612431	1.23578
GOTERM_BP_FAT	GO:0031328~positive regulation of cellular biosynthetic process	59	3.78448	0.000761847	HSP90AB1, MEF2A, ELF1, PAX6, TLR3, RORB, TLR4, PDX1, PAX3, ZBTB38, MLL5, PIWIL2, MKL2, LTB, SPN, ALX1, MYST3, HSP90AA1, RXRA, SOX11, SIX2, MED13, PPARGC1A, PPARGC1B, INHBA, MTF1, VEGFA, CLOCK, MED1, FUS, UBE3A, SOX5, SOX4, ELK1, SOX9, TCF7L2, CHD8, TEF, POU3F2, TRAF6, ETV4, MYSM1, HNRNPAB, IKZF2, KLF12, CREBBP, MAML2, GSX1, IGF1, CREB5, ATF4, NOTCH1, CSRNP3, GCK, MAPK14, ATXN7, THRAP3, EBF1, PBX1	935	552	13588	1.55331	0.873714	0.0645696	1.34794
GOTERM_BP_FAT	GO:0042981~regulation of apoptosis	59	3.78448	0.000803551	RBM5, PTEN, MAP3K7, BAG4, SIN3A, ANK2, BAG3, PIK3CA, DNAJC5, DLG5, LTB, WWOX, SPN, DHCR24, PRKCA, NMNAT3, NUDT2, TFPT, AIFM2, MADD, CYCS, ESR1, UBE2B, STK3, JMY, XPA, HIPK1, VEGFA, NAIF1, PSME3, CDK5R1, BCLAF1, XIAP, STK17B, ZBTB16, RRM2B, ITM2B, SOX9, ZC3H8, CHD8, UTP11L, PCSK9, TRP53INP1, TRAF6, RASA1, PIK3R1, APC, STAMBP, IL2RA, TM2D1, HTT, IGF1, SAP30BP, TAX1BP1, NOTCH1, PSMG2, CDKN1B, CSRNP3…	935	553	13588	1.5505	0.887243	0.0659298	1.42122
GOTERM_BP_FAT	GO:0010557~positive regulation of macromolecule biosynthetic process	57	3.65619	0.000827976	MEF2A, ELF1, PAX6, TLR3, RORB, TLR4, PDX1, PAX3, ZBTB38, MLL5, PIWIL2, MKL2, LTB, SPN, ALX1, MYST3, RXRA, SOX11, SIX2, MED13, PPARGC1A, PPARGC1B, INHBA, MTF1, VEGFA, CLOCK, MED1, FUS, UBE3A, SOX5, SOX4, ELK1, SOX9, TCF7L2, CHD8, TEF, POU3F2, TRAF6, MYSM1, ETV4, HNRNPAB, IKZF2, KLF12, CREBBP, MAML2, GSX1, IGF1, CREB5, ATF4, NOTCH1, GCK, CSRNP3, MAPK14, ATXN7, THRAP3, EBF1, PBX1	935	530	13588	1.56294	0.894483	0.0658778	1.46412
GOTERM_BP_FAT	GO:0043065~positive regulation of apoptosis	32	2.0526	0.000879152	CDK5R1, BCLAF1, STK17B, RBM5, RRM2B, ZBTB16, ITM2B, PTEN, ZC3H8, UTP11L, TRP53INP1, PCSK9, TRAF6, LTB, SPN, WWOX, APC, PRKCA, NUDT2, IL2RA, AIFM2, TM2D1, TFPT, CYCS, SAP30BP, STK3, JMY, XPA, NOTCH1, HIPK1, CSRNP3, NAIF1	935	248	13588	1.87518	0.908182	0.0678241	1.55395
GOTERM_BP_FAT	GO:0030163~protein catabolic process	59	3.78448	0.000916915	SPG7, DZIP3, PPP2R5C, RNF216, VPRBP, CDC16, RLIM, SENP7, CNOT4, OS9, ZYG11B, CUL5, WWP2, RANBP2, TBL1XR1, BRCC3, USP1, ENC1, SOCS6, GAN, UBE2H, HERC2, HERC1, UBE2B, DCUN1D2, KDM2A, BACE2, YME1L1, ANAPC7, RNF20, ASB7, USP7, RAD23B, OTUD5, USP8, XIAP, UBE3A, CBLL1, FEM1A, WDYHV1, PSMB1, FBXW2, PCSK9, USP37, RNF168, USP36, FBXO3, TRAF6, MYSM1, TRIP12, STAMBP, HACE1, UBE2L3, RNF43, TULP4, NEDD4, SMUR…	935	556	13588	1.54213	0.917137	0.0686862	1.62019
GOTERM_BP_FAT	GO:0010970~microtubule-based transport	7	0.449006	0.000939905	SPG7, KIF1B, KIF5B, HTT, RHOT1, PAFAH1B1, DST	935	18	13588	5.65157	0.922156	0.0684616	1.66049
GOTERM_BP_FAT	GO:0009891~positive regulation of biosynthetic process	59	3.78448	0.000943349	HSP90AB1, MEF2A, ELF1, PAX6, TLR3, RORB, TLR4, PDX1, PAX3, ZBTB38, MLL5, PIWIL2, MKL2, LTB, SPN, ALX1, MYST3, HSP90AA1, RXRA, SOX11, SIX2, MED13, PPARGC1A, PPARGC1B, INHBA, MTF1, VEGFA, CLOCK, MED1, FUS, UBE3A, SOX5, SOX4, ELK1, SOX9, TCF7L2, CHD8, TEF, POU3F2, TRAF6, ETV4, MYSM1, HNRNPAB, IKZF2, KLF12, CREBBP, MAML2, GSX1, IGF1, CREB5, ATF4, NOTCH1, CSRNP3, GCK, MAPK14, ATXN7, THRAP3, EBF1, PBX1	935	557	13588	1.53936	0.922881	0.0669105	1.66653
GOTERM_BP_FAT	GO:0043068~positive regulation of programmed cell death	32	2.0526	0.00100457	CDK5R1, BCLAF1, STK17B, RBM5, RRM2B, ZBTB16, ITM2B, PTEN, ZC3H8, UTP11L, TRP53INP1, PCSK9, TRAF6, LTB, SPN, WWOX, APC, PRKCA, NUDT2, IL2RA, AIFM2, TM2D1, TFPT, CYCS, SAP30BP, STK3, JMY, XPA, NOTCH1, HIPK1, CSRNP3, NAIF1	935	250	13588	1.86018	0.934702	0.0692925	1.77378
GOTERM_BP_FAT	GO:0042445~hormone metabolic process	16	1.0263	0.00114184	STAR, CYP11A1, HTT, ESR1, PTPN11, PCSK2, RDH12, AFP, ECE1, DIO2, SAFB, SRD5A1, BCO2, RETSAT, MED1, CYP19A1	935	90	13588	2.58358	0.955034	0.0764541	2.01382
GOTERM_BP_FAT	GO:0044265~cellular macromolecule catabolic process	63	4.04105	0.00115835	DZIP3, PPP2R5C, RNF216, VPRBP, CDC16, DNASE1L2, RLIM, SENP7, OS9, CNOT4, ZYG11B, CUL5, WWP2, RANBP2, TBL1XR1, BRCC3, USP1, ENC1, SOCS6, GAN, UBE2H, HERC2, HERC1, UBE2B, DCUN1D2, KDM2A, BACE2, ANAPC7, RNF20, EIF2C3, XRN2, ASB7, USP7, RAD23B, OTUD5, USP8, XIAP, UBE3A, CBLL1, FEM1A, PSMB1, EIF3E, FBXW2, PCSK9, USP37, RNF168, USP36, FBXO3, TRAF6, MYSM1, TRIP12, STAMBP, SMG6, HACE1, SMG1, UBE2L3, RNF4…	935	609	13588	1.50337	0.957008	0.0756535	2.04266
GOTERM_BP_FAT	GO:0010817~regulation of hormone levels	20	1.28287	0.00116357	STAR, CYP11A1, HTT, ESR1, ILDR2, RPH3A, PTPN11, PCSK2, RDH12, AFP, ACVR2B, ECE1, DGAT1, DIO2, SAFB, SRD5A1, BCO2, MED1, RETSAT, CYP19A1	935	128	13588	2.27072	0.957614	0.0741991	2.05178
GOTERM_BP_FAT	GO:0060736~prostate gland growth	6	0.384862	0.0012262	UBE3A, ESR1, IGF1, SOX9, PTEN, CYP19A1	935	13	13588	6.70736	0.964249	0.0762502	2.16109
GOTERM_BP_FAT	GO:0000902~cell morphogenesis	37	2.37332	0.00129483	DCC, BBS4, CDK5R1, ENAH, PARD3, PAX6, IL7R, SOX9, TTLL3, NRCAM, ATP2B2, ANK3, COL4A3BP, CLASP2, MTAP7, ETV4, DCLK1, APC, HNRNPAB, EGFR, KLK8, CRYAA, KIF5C, STXBP1, PCDH15, STK4, PTPN11, SLITRK2, SS18, NOTCH1, MAPK14, MAPK8IP3, 2610109H07RIK, CHRNB2, RBPJ, DST, ADD1	935	309	13588	1.74015	0.970333	0.0785509	2.28072
GOTERM_BP_FAT	GO:0045944~positive regulation of transcription from RNA polymerase II promoter	41	2.62989	0.00159855	FUS, ELF1, UBE3A, SOX5, PAX6, SOX4, ELK1, PAX3, PDX1, SOX9, TCF7L2, ZBTB38, CHD8, TEF, POU3F2, MKL2, ALX1, IKZF2, KLF12, RXRA, SOX11, CREBBP, MAML2, GSX1, SIX2, IGF1, MED13, PPARGC1A, PPARGC1B, INHBA, ATF4, NOTCH1, CSRNP3, MTF1, MAPK14, ATXN7, THRAP3, VEGFA, PBX1, CLOCK, MED1	935	358	13588	1.66435	0.987009	0.0940006	2.80855
GOTERM_BP_FAT	GO:0051129~negative regulation of cellular component organization	16	1.0263	0.00160703	KLK8, ESR1, RDX, PTEN, UBE2B, TTC3, MSX3, PSMG2, SPNB2, MTAP1B, TMOD3, TGFBR3, CLASP1, CLASP2, MAPRE1, APC	935	93	13588	2.50024	0.987306	0.0924761	2.82324
GOTERM_BP_FAT	GO:0045893~positive regulation of transcription, DNA-dependent	46	2.95061	0.00161931	FUS, ELF1, UBE3A, SOX5, PAX6, SOX4, ELK1, RORB, PAX3, PDX1, SOX9, TCF7L2, ZBTB38, CHD8, MLL5, TEF, POU3F2, MKL2, MYSM1, HNRNPAB, ALX1, IKZF2, KLF12, RXRA, SOX11, CREBBP, MAML2, GSX1, SIX2, IGF1, CREB5, MED13, PPARGC1A, PPARGC1B, INHBA, ATF4, NOTCH1, CSRNP3, MTF1, MAPK14, ATXN7, VEGFA, THRAP3, PBX1, CLOCK, MED1	935	416	13588	1.60697	0.987723	0.0912198	2.84453
GOTERM_BP_FAT	GO:0045935~positive regulation of nucleobase, nucleoside, nucleotide and nucleic acid metabolic process	54	3.46376	0.00162974	MEF2A, ELF1, PAX6, RORB, PDX1, PAX3, ZBTB38, MLL5, MKL2, MYST3, ALX1, BRCC3, RXRA, SOX11, SIX2, MED13, UBE2B, PPARGC1A, PPARGC1B, EYA3, INHBA, MTF1, VEGFA, CLOCK, MED1, FUS, UBE3A, SOX5, SOX4, ELK1, SOX9, TCF7L2, CHD8, TEF, POU3F2, RNF168, MYSM1, ETV4, HNRNPAB, IKZF2, KLF12, CREBBP, MAML2, GSX1, IGF1, CREB5, ATF4, NOTCH1, CSRNP3, MAPK14, ATXN7, THRAP3, EBF1, PBX1	935	510	13588	1.53875	0.988066	0.0899175	2.86259
GOTERM_BP_FAT	GO:0016071~mRNA metabolic process	36	2.30917	0.00164936	TDRD3, PRPF4B, 0610009D07RIK, TRA2B, RBM4, RBM5, WBP11, SF3B2, PNN, RBM4B, TCP11, DDX46, CNOT6L, SRRM2, EIF3E, SRRM1, LUC7L3, RBM25, PRPF40A, GEMIN5, SRPK2, SMG6, SMG1, MBNL1, SLBP, AQR, DCP1B, RSRC1, SFPQ, VEGFA, LSM11, CPSF6, RBM39, EIF2C3, PRPF38B, XRN2	935	302	13588	1.73237	0.988686	0.0891426	2.89658
GOTERM_BP_FAT	GO:0006605~protein targeting	20	1.28287	0.00184233	GRPEL2, SRP54A, HTT, SRP54B, SNUPN, SRP54C, DNHD1, FGF10, TOMM40, SIX2, IPO8, YWHAG, NUP214, GCKR, SPNB2, NOP58, TPR, XPO7, TNPO1, KPNB1, KPNA2, KPNA1	935	133	13588	2.18536	0.993306	0.097128	3.23026
GOTERM_BP_FAT	GO:0044257~cellular protein catabolic process	56	3.59205	0.00185605	DZIP3, PPP2R5C, RNF216, VPRBP, CDC16, RLIM, SENP7, CNOT4, OS9, ZYG11B, CUL5, WWP2, RANBP2, TBL1XR1, BRCC3, USP1, ENC1, SOCS6, GAN, UBE2H, HERC2, HERC1, UBE2B, DCUN1D2, KDM2A, BACE2, ANAPC7, RNF20, ASB7, USP7, RAD23B, OTUD5, USP8, XIAP, UBE3A, CBLL1, FEM1A, PSMB1, PCSK9, USP37, FBXW2, USP36, RNF168, FBXO3, TRAF6, TRIP12, MYSM1, STAMBP, HACE1, UBE2L3, RNF43, TULP4, NEDD4, SMURF2, USP48, USP45	935	537	13588	1.51551	0.993551	0.095956	3.25394
GOTERM_BP_FAT	GO:0050680~negative regulation of epithelial cell proliferation	8	0.513149	0.00186235	CDKN1B, STK11, PHB2, PAX6, TGFBR3, PTEN, ETV4, APC	935	27	13588	4.30596	0.993661	0.0944702	3.26481
GOTERM_BP_FAT	GO:0051254~positive regulation of RNA metabolic process	46	2.95061	0.00187695	FUS, ELF1, UBE3A, SOX5, PAX6, SOX4, ELK1, RORB, PAX3, PDX1, SOX9, TCF7L2, ZBTB38, CHD8, MLL5, TEF, POU3F2, MKL2, MYSM1, HNRNPAB, ALX1, IKZF2, KLF12, RXRA, SOX11, CREBBP, MAML2, GSX1, SIX2, IGF1, CREB5, MED13, PPARGC1A, PPARGC1B, INHBA, ATF4, NOTCH1, CSRNP3, MTF1, MAPK14, ATXN7, VEGFA, THRAP3, PBX1, CLOCK, MED1	935	419	13588	1.59547	0.993908	0.0934331	3.29
GOTERM_BP_FAT	GO:0015031~protein transport	65	4.16934	0.00225566	COPA, GRPEL2, CLTB, CHMP5, VPS54, FGF10, VPS33A, HOOK3, KIF13A, RANBP3, RAB6B, VPS13A, RANBP2, GLE1, VPS13B, TPR, KPNB1, ZW10, NUP133, RAB39B, SRP54A, SNUPN, SRP54B, RINT1, SRP54C, STXBP1, SIX2, IPO8, RPH3A, VTI1A, RAB14, KPNA2, KPNA1, SNAP29, SDAD1, NAPG, STAM2, NUP93, MIA3, GCKR, NUP214, NUP210, STX17, SPNB2, SEC22A, CHM, SEC22C, VPS35, APPBP2, DOPEY1, TNPO1, FAM125B, ASPSCR1, RAB2B, MYO1C, HTT…	935	651	13588	1.45103	0.997826	0.10924	3.94131
GOTERM_BP_FAT	GO:0043632~modification-dependent macromolecule catabolic process	53	3.39962	0.0024764	DZIP3, PPP2R5C, RNF216, VPRBP, CDC16, RLIM, SENP7, CNOT4, OS9, ZYG11B, CUL5, WWP2, RANBP2, TBL1XR1, BRCC3, USP1, ENC1, SOCS6, GAN, UBE2H, HERC2, HERC1, UBE2B, DCUN1D2, KDM2A, ANAPC7, RNF20, ASB7, USP7, OTUD5, RAD23B, USP8, XIAP, UBE3A, CBLL1, FEM1A, USP37, FBXW2, USP36, RNF168, FBXO3, TRAF6, TRIP12, MYSM1, STAMBP, HACE1, UBE2L3, RNF43, TULP4, NEDD4, SMURF2, USP48, USP45	935	508	13588	1.5162	0.998808	0.117205	4.31904
GOTERM_BP_FAT	GO:0019941~modification-dependent protein catabolic process	53	3.39962	0.0024764	DZIP3, PPP2R5C, RNF216, VPRBP, CDC16, RLIM, SENP7, CNOT4, OS9, ZYG11B, CUL5, WWP2, RANBP2, TBL1XR1, BRCC3, USP1, ENC1, SOCS6, GAN, UBE2H, HERC2, HERC1, UBE2B, DCUN1D2, KDM2A, ANAPC7, RNF20, ASB7, USP7, OTUD5, RAD23B, USP8, XIAP, UBE3A, CBLL1, FEM1A, USP37, FBXW2, USP36, RNF168, FBXO3, TRAF6, TRIP12, MYSM1, STAMBP, HACE1, UBE2L3, RNF43, TULP4, NEDD4, SMURF2, USP48, USP45	935	508	13588	1.5162	0.998808	0.117205	4.31904
GOTERM_BP_FAT	GO:0045184~establishment of protein localization	65	4.16934	0.00266991	COPA, GRPEL2, CLTB, CHMP5, VPS54, FGF10, VPS33A, HOOK3, KIF13A, RANBP3, RAB6B, VPS13A, RANBP2, GLE1, VPS13B, TPR, KPNB1, ZW10, NUP133, RAB39B, SRP54A, SNUPN, SRP54B, RINT1, SRP54C, STXBP1, SIX2, IPO8, RPH3A, VTI1A, RAB14, KPNA2, KPNA1, SNAP29, SDAD1, NAPG, STAM2, NUP93, MIA3, GCKR, NUP214, NUP210, STX17, SPNB2, SEC22A, CHM, SEC22C, VPS35, APPBP2, DOPEY1, TNPO1, FAM125B, ASPSCR1, RAB2B, MYO1C, HTT…	935	656	13588	1.43997	0.999296	0.123635	4.64901
GOTERM_BP_FAT	GO:0051603~proteolysis involved in cellular protein catabolic process	55	3.5279	0.0026723	DZIP3, PPP2R5C, RNF216, VPRBP, CDC16, RLIM, SENP7, CNOT4, OS9, ZYG11B, CUL5, WWP2, RANBP2, TBL1XR1, BRCC3, USP1, ENC1, SOCS6, GAN, UBE2H, HERC2, HERC1, UBE2B, DCUN1D2, KDM2A, BACE2, ANAPC7, RNF20, ASB7, USP7, OTUD5, RAD23B, USP8, XIAP, UBE3A, CBLL1, FEM1A, PSMB1, USP37, FBXW2, USP36, RNF168, FBXO3, TRAF6, TRIP12, MYSM1, STAMBP, HACE1, UBE2L3, RNF43, TULP4, NEDD4, SMURF2, USP48, USP45	935	534	13588	1.49681	0.9993	0.12167	4.65308
GOTERM_BP_FAT	GO:0045941~positive regulation of transcription	50	3.20718	0.00278151	MEF2A, ELF1, PAX6, RORB, PDX1, PAX3, ZBTB38, MLL5, MKL2, MYST3, ALX1, SOX11, RXRA, SIX2, MED13, PPARGC1A, PPARGC1B, INHBA, MTF1, VEGFA, CLOCK, MED1, FUS, UBE3A, SOX5, ELK1, SOX4, SOX9, TCF7L2, CHD8, TEF, POU3F2, MYSM1, ETV4, HNRNPAB, IKZF2, KLF12, CREBBP, MAML2, GSX1, IGF1, CREB5, NOTCH1, ATF4, CSRNP3, MAPK14, ATXN7, THRAP3, EBF1, PBX1	935	475	13588	1.52975	0.99948	0.124248	4.83882
GOTERM_BP_FAT	GO:0010628~positive regulation of gene expression	51	3.27133	0.00290779	MEF2A, ELF1, PAX6, RORB, PDX1, PAX3, ZBTB38, MLL5, MKL2, MYST3, ALX1, SOX11, RXRA, ESR1, SIX2, MED13, PPARGC1A, PPARGC1B, INHBA, MTF1, VEGFA, CLOCK, MED1, FUS, UBE3A, SOX5, ELK1, SOX4, SOX9, TCF7L2, CHD8, TEF, POU3F2, MYSM1, ETV4, HNRNPAB, IKZF2, KLF12, CREBBP, MAML2, GSX1, IGF1, CREB5, NOTCH1, ATF4, CSRNP3, MAPK14, ATXN7, THRAP3, EBF1, PBX1	935	488	13588	1.51878	0.999632	0.127431	5.05317
GOTERM_BP_FAT	GO:0019827~stem cell maintenance	7	0.449006	0.00298078	RIF1, DICER1, CREBBP, PIWIL2, TCF7L2, APC, MYST3	935	22	13588	4.62402	0.999698	0.128354	5.17686
GOTERM_BP_FAT	GO:0006915~apoptosis	49	3.14304	0.00301078	FASTKD1, MEF2A, RBM5, RNF216, PTEN, PDCD1, BAG4, ANK2, BAG3, TIA1, ACIN1, LTB, WWOX, LUC7L3, MADD, SCN2A1, CYCS, STK4, STK3, SLTM, RNF130, BNIP2, SH3KBP1, NAIF1, BUB1B, PSME3, MDM4, DCC, XIAP, STK17B, RRAGA, ITM2B, PRUNE2, ECE1, TRP53INP1, TRAF6, IL2RA, PDCD10, TM2D1, AIMP2, HTT, SAP30BP, TAX1BP1, TNFSF10, PSMG2, P2RX1, CSRNP3, SULF1, RHOT1	935	465	13588	1.53139	0.999722	0.127544	5.22764
GOTERM_BP_FAT	GO:0010639~negative regulation of organelle organization	12	0.769724	0.00304506	MSX3, PSMG2, SPNB2, MTAP1B, ESR1, TMOD3, CLASP1, RDX, MAPRE1, CLASP2, UBE2B, APC	935	62	13588	2.81277	0.999746	0.126928	5.28566
GOTERM_BP_FAT	GO:0006333~chromatin assembly or disassembly	17	1.09044	0.0030956	H1F0, ARID4A, ARID4B, CBX5, CHD8, HIST1H1T, BAZ1B, CENPA, HIST2H2BE, HJURP, SMARCC1, HIST1H3B, HIST3H2A, CHD6, CHD4, HIST1H3H, MYST3	935	109	13588	2.26656	0.999779	0.126954	5.37111
GOTERM_BP_FAT	GO:0045596~negative regulation of cell differentiation	24	1.53945	0.00335713	DICER1, PAX6, FGF10, ZBTB16, SOX9, TCF7L2, TTC3, ZC3H8, ZFP91, CLEC2D, PIWIL2, PIK3R1, MYST3, APC, KLK8, CREBBP, SIX2, NOTCH1, CCND1, CNTF, RIF1, NOTCH4, TGFBR3, PBX1, RBPJ	935	182	13588	1.91639	0.999892	0.134908	5.8122
GOTERM_BP_FAT	GO:0060070~Wnt receptor signaling pathway through beta-catenin	6	0.384862	0.00349985	CCND1, CHD8, STK11, SOX4, UBE2B, APC	935	16	13588	5.44973	0.999927	0.138199	6.05207
GOTERM_BP_FAT	GO:0032989~cellular component morphogenesis	39	2.5016	0.00356531	DCC, BBS4, CDK5R1, ENAH, PARD3, PAX6, IL7R, SOX9, TTLL3, NRCAM, ATP2B2, ANK3, COL4A3BP, PAFAH1B1, CLASP2, MTAP7, ETV4, DCLK1, APC, HNRNPAB, EGFR, KLK8, CRYAA, KIF5C, STXBP1, PCDH15, UBE2B, STK4, PTPN11, SLITRK2, SS18, NOTCH1, MAPK14, MAPK8IP3, 2610109H07RIK, CHRNB2, RBPJ, DST, ADD1	935	351	13588	1.61474	0.999939	0.138592	6.16191
GOTERM_BP_FAT	GO:0048864~stem cell development	7	0.449006	0.00380175	RIF1, DICER1, CREBBP, PIWIL2, TCF7L2, APC, MYST3	935	23	13588	4.42297	0.999968	0.14503	6.55761
GOTERM_BP_FAT	GO:0012501~programmed cell death	49	3.14304	0.00424806	FASTKD1, MEF2A, RBM5, RNF216, PTEN, PDCD1, BAG4, ANK2, BAG3, TIA1, ACIN1, LTB, WWOX, LUC7L3, MADD, SCN2A1, CYCS, STK4, STK3, SLTM, RNF130, BNIP2, SH3KBP1, NAIF1, BUB1B, PSME3, MDM4, DCC, XIAP, STK17B, RRAGA, ITM2B, PRUNE2, ECE1, TRP53INP1, TRAF6, IL2RA, PDCD10, TM2D1, AIMP2, HTT, SAP30BP, TAX1BP1, TNFSF10, PSMG2, P2RX1, CSRNP3, SULF1, RHOT1	935	473	13588	1.50549	0.99999	0.158449	7.30024
GOTERM_BP_FAT	GO:0048863~stem cell differentiation	8	0.513149	0.0043358	RIF1, DICER1, CREBBP, PIWIL2, TCF7L2, ETV4, APC, MYST3	935	31	13588	3.75035	0.999992	0.159274	7.44558
GOTERM_BP_FAT	GO:0033043~regulation of organelle organization	21	1.34702	0.00440338	ESR1, RDX, RICTOR, HERC2, UBE2B, MSX3, CDKN1B, PSMG2, SPNB2, MTAP1B, TMOD3, TLK1, CLASP1, MAPRE1, CLASP2, LTB, NCOR1, DST, RASA1, APC, CLEC2I	935	154	13588	1.98172	0.999994	0.159406	7.55739
GOTERM_BP_FAT	GO:0003006~reproductive developmental process	31	1.98845	0.00454386	BBS4, UBE3A, RPS6KB1, ZBTB16, SOX9, TCF7L2, PTEN, NR2C2, TAF7L, INSRR, PAFAH1B1, SRD5A1, MTAP7, PCYT1B, LHX9, FANCC, DHCR24, CYP19A1, RXRA, ESR1, IGF1, PDE3A, UBE2B, AFP, NOTCH1, RPS6KA2, PHB2, VEGFA, PTGDR, PBX1, MED1	935	264	13588	1.70648	0.999996	0.161917	7.78938
GOTERM_BP_FAT	GO:0008088~axon cargo transport	5	0.320718	0.00495119	SPG7, KIF1B, HTT, PAFAH1B1, DST	935	11	13588	6.60574	0.999999	0.172876	8.45893
GOTERM_BP_FAT	GO:0007017~microtubule-based process	26	1.66774	0.00537937	HAUS4, BBS4, KIF22, SPG7, TUBA3A, HOOK3, TTLL3, KIF13A, TEKT3, TUBE1, PAFAH1B1, MTAP7, KIF13B, CRYAA, KIF5B, CKAP5, HTT, KIF5C, CEP63, UBE2B, SS18, KIF1B, MTAP1B, RHOT1, DST, XRN2	935	211	13588	1.79075	1	0.184044	9.15782
GOTERM_BP_FAT	GO:0006457~protein folding	18	1.15459	0.00611677	HSP90AB1, GRPEL2, HSP90AA1, DNAJB14, FKBP1A, CCT3, NKTR, PFDN1, CCT5, PPIG, CCT4, HSPA4L, TOR1B, DNAJC5, HSPE1, HSPD1, RANBP2, DNAJA2	935	127	13588	2.05974	1	0.204029	10.3496
GOTERM_BP_FAT	GO:0008219~cell death	51	3.27133	0.00615533	FASTKD1, MEF2A, RBM5, RNF216, PTEN, PDCD1, BAG4, ANK2, BAG3, TIA1, ACIN1, LTB, WWOX, LUC7L3, MADD, SCN2A1, CYCS, GAN, STK4, STK3, SLTM, RNF130, BNIP2, SH3KBP1, NAIF1, BUB1B, PSME3, MDM4, DCC, XIAP, STK17B, RRAGA, ITM2B, PRUNE2, ECE1, TRP53INP1, TRAF6, KLK8, IL2RA, PDCD10, TM2D1, HTT, AIMP2, SAP30BP, TAX1BP1, TNFSF10, PSMG2, P2RX1, CSRNP3, SULF1, RHOT1	935	507	13588	1.46186	1	0.202706	10.4115
GOTERM_BP_FAT	GO:0006396~RNA processing	45	2.88647	0.00685202	TDRD3, PRPF4B, 0610009D07RIK, TRA2B, DICER1, RBM4, RBM5, WBP11, INTS3, SART3, SF3B2, PNN, INTS8, RBM4B, UTP11L, TCP11, DDX46, RRP1B, CNOT6L, TRMT6, SRRM2, PIWIL2, SRRM1, WDR12, TGS1, FTSJ1, LUC7L3, RBM25, GEMIN5, PRPF40A, SRPK2, RRP1, EXOSC4, MBNL1, SLBP, PA2G4, AQR, RSRC1, SFPQ, LSM11, CPSF6, RBM39, UTP14A, PRPF38B, XRN2	935	437	13588	1.49649	1	0.22034	11.5233
GOTERM_BP_FAT	GO:0006397~mRNA processing	30	1.92431	0.00748457	TDRD3, PRPF4B, 0610009D07RIK, TRA2B, RBM4, RBM5, WBP11, SF3B2, PNN, RBM4B, TCP11, DDX46, CNOT6L, SRRM2, SRRM1, LUC7L3, RBM25, PRPF40A, GEMIN5, SRPK2, MBNL1, SLBP, AQR, RSRC1, SFPQ, LSM11, CPSF6, RBM39, XRN2, PRPF38B	935	262	13588	1.66404	1	0.235384	12.5214
GOTERM_BP_FAT	GO:0002009~morphogenesis of an epithelium	22	1.41116	0.0077969	EGFR, BBS4, ENAH, HTT, ESR1, IGF1, FGF10, PCDH15, PAX3, PDX1, SOX9, MAP3K7, NOTCH1, HOXB2, TIMELESS, PHB2, PBX1, TRAF6, TBX18, ETV4, ALX1, MED1	935	173	13588	1.84808	1	0.241183	13.0103
GOTERM_BP_FAT	GO:0022402~cell cycle process	41	2.62989	0.00810148	HAUS4, PPP2R3A, STK11, NEK1, CHEK1, AURKB, CDC16, ZFP318, SESN3, MLL5, SIN3A, TRP53INP1, PIWIL2, PMS2, MTAP9, PAFAH1B1, CLASP1, CLASP2, APC, ZW10, CRYAA, CKAP5, CEP63, HMGA2, 9130404D08RIK, UBE2B, NCAPD3, MIS12, JMY, CCND1, PPM1D, CDKN1B, TIMELESS, RPS6KA2, BUB1B, SETD8, MDM4, ANAPC7, MAPRE1, SMC1A, DST	935	393	13588	1.51613	1	0.246587	13.4845
GOTERM_BP_FAT	GO:0034613~cellular protein localization	33	2.11674	0.00837368	BBS4, GRPEL2, COPA, CLTB, NAPG, STAM2, PAX6, FGF10, NUP214, GCKR, SIN3A, ANK2, STX17, SPNB2, CHM, TPR, TNPO1, KPNB1, ASPSCR1, SRP54A, HTT, SRP54B, SNUPN, SRP54C, DNHD1, SIX2, TOMM40, IPO8, RPH3A, VTI1A, YWHAG, NOP58, XPO7, KPNA2, KPNA1	935	299	13588	1.60393	1	0.250981	13.9063
GOTERM_BP_FAT	GO:0048732~gland development	24	1.53945	0.00878208	EGFR, IRS2, UBE3A, RXRA, GSX1, MET, PAX6, HK2, ESR1, IGF1, FGF10, SOX9, PTEN, ATP2B2, CCND1, NOTCH1, PHB2, VEGFA, PBX1, POU3F2, RBPJ, ETV4, MED1, CYP19A1	935	197	13588	1.77047	1	0.258706	14.5355
GOTERM_BP_FAT	GO:0070727~cellular macromolecule localization	33	2.11674	0.00919998	BBS4, GRPEL2, COPA, CLTB, NAPG, STAM2, PAX6, FGF10, NUP214, GCKR, SIN3A, ANK2, STX17, SPNB2, CHM, TPR, TNPO1, KPNB1, ASPSCR1, SRP54A, HTT, SRP54B, SNUPN, SRP54C, DNHD1, SIX2, TOMM40, IPO8, RPH3A, VTI1A, YWHAG, NOP58, XPO7, KPNA2, KPNA1	935	301	13588	1.59328	1	0.266404	15.1748
GOTERM_BP_FAT	GO:0016265~death	51	3.27133	0.00936394	FASTKD1, MEF2A, RBM5, RNF216, PTEN, PDCD1, BAG4, ANK2, BAG3, TIA1, ACIN1, LTB, WWOX, LUC7L3, MADD, SCN2A1, CYCS, GAN, STK4, STK3, SLTM, RNF130, BNIP2, SH3KBP1, NAIF1, BUB1B, PSME3, MDM4, DCC, XIAP, STK17B, RRAGA, ITM2B, PRUNE2, ECE1, TRP53INP1, TRAF6, KLK8, IL2RA, PDCD10, TM2D1, HTT, AIMP2, SAP30BP, TAX1BP1, TNFSF10, PSMG2, P2RX1, CSRNP3, SULF1, RHOT1	935	519	13588	1.42806	1	0.267651	15.4244
GOTERM_BP_FAT	GO:0000278~mitotic cell cycle	28	1.79602	0.00966494	HAUS4, PPP2R3A, NEK1, CHEK1, AURKB, CDC16, SIN3A, MTAP9, CLASP1, PAFAH1B1, CLASP2, ZW10, APC, CKAP5, HMGA2, 9130404D08RIK, CEP63, NCAPD3, MIS12, CCND1, PPM1D, TIMELESS, RPS6KA2, BUB1B, SETD8, MAPRE1, ANAPC7, SMC1A	935	244	13588	1.66768	1	0.272169	15.8809
GOTERM_BP_FAT	GO:0031110~regulation of microtubule polymerization or depolymerization	7	0.449006	0.0105784	CDKN1B, MTAP1B, CLASP1, MAPRE1, CLASP2, DST, APC	935	28	13588	3.63316	1	0.290879	17.2518
GOTERM_BP_FAT	GO:0006917~induction of apoptosis	21	1.34702	0.0106848	PRKCA, NUDT2, AIFM2, TFPT, TM2D1, STK17B, RRM2B, SAP30BP, ITM2B, PTEN, JMY, XPA, UTP11L, HIPK1, NAIF1, TRP53INP1, PCSK9, TRAF6, LTB, SPN, WWOX	935	167	13588	1.82746	1	0.290448	17.4101
GOTERM_BP_FAT	GO:0012502~induction of programmed cell death	21	1.34702	0.0106848	PRKCA, NUDT2, AIFM2, TFPT, TM2D1, STK17B, RRM2B, SAP30BP, ITM2B, PTEN, JMY, XPA, UTP11L, HIPK1, NAIF1, TRP53INP1, PCSK9, TRAF6, LTB, SPN, WWOX	935	167	13588	1.82746	1	0.290448	17.4101
GOTERM_BP_FAT	GO:0051301~cell division	31	1.98845	0.0107971	HAUS4, PARD3, NEK1, AURKB, CDC16, ZBTB16, NR2C2, TOP1, MTAP9, PAFAH1B1, POU3F2, CLASP1, CLASP2, APC, ZW10, CENPO, CKAP5, CEP110, CEP63, HMGA2, 9130404D08RIK, NCAPD3, MIS12, CCND1, NOTCH1, TIMELESS, BUB1B, SETD8, MAPRE1, ANAPC7, SMC1A	935	281	13588	1.60324	1	0.29016	17.5769
GOTERM_BP_FAT	GO:0006793~phosphorus metabolic process	78	5.00321	0.0109517	PRPF4B, STYX, CAD, RPS6KB1, AURKB, PRKG1, PTEN, C230081A13RIK, INSRR, MAP3K7, CSNK2A1, MOS, CDK12, PIK3CA, TLK1, PRKACB, BRD4, PRKCA, EGFR, SRPK2, MADD, PIK3CD, WNK1, STK4, PTPDC1, STK3, EYA3, BC021891, MAST4, PPM1D, ACVR2B, CCND1, EIF2AK1, BAZ1B, HIPK1, RIOK3, SBF2, EIF2S1, CAMK1, BUB1B, PPM1L, PPP2R3A, STK11, NEK1, HK2, STK17B, BMPR2, CHEK1, DUSP12, SDHAF2, IRAK4, MTMR3, MAP3K2, SPNB2, PPP1R12A…	935	866	13588	1.30894	1	0.290826	17.806
GOTERM_BP_FAT	GO:0006796~phosphate metabolic process	78	5.00321	0.0109517	PRPF4B, STYX, CAD, RPS6KB1, AURKB, PRKG1, PTEN, C230081A13RIK, INSRR, MAP3K7, CSNK2A1, MOS, CDK12, PIK3CA, TLK1, PRKACB, BRD4, PRKCA, EGFR, SRPK2, MADD, PIK3CD, WNK1, STK4, PTPDC1, STK3, EYA3, BC021891, MAST4, PPM1D, ACVR2B, CCND1, EIF2AK1, BAZ1B, HIPK1, RIOK3, SBF2, EIF2S1, CAMK1, BUB1B, PPM1L, PPP2R3A, STK11, NEK1, HK2, STK17B, BMPR2, CHEK1, DUSP12, SDHAF2, IRAK4, MTMR3, MAP3K2, SPNB2, PPP1R12A…	935	866	13588	1.30894	1	0.290826	17.806
GOTERM_BP_FAT	GO:0008380~RNA splicing	24	1.53945	0.011061	TDRD3, SRPK2, PRPF4B, 0610009D07RIK, TRA2B, RBM4, RBM5, WBP11, MBNL1, PNN, RBM4B, TCP11, AQR, DDX46, RSRC1, SFPQ, SRRM2, SRRM1, LSM11, RBM39, LUC7L3, PRPF38B, PRPF40A, GEMIN5	935	201	13588	1.73524	1	0.290474	17.9676
GOTERM_BP_FAT	GO:0000280~nuclear division	23	1.4753	0.0112109	HAUS4, CKAP5, NEK1, AURKB, CDC16, CEP63, HMGA2, 9130404D08RIK, NCAPD3, MIS12, TIMELESS, RPS6KA2, MTAP9, BUB1B, SETD8, PAFAH1B1, CLASP1, MAPRE1, CLASP2, ANAPC7, SMC1A, APC, ZW10	935	190	13588	1.75921	1	0.291019	18.1887
GOTERM_BP_FAT	GO:0007067~mitosis	23	1.4753	0.0112109	HAUS4, CKAP5, NEK1, AURKB, CDC16, CEP63, HMGA2, 9130404D08RIK, NCAPD3, MIS12, TIMELESS, RPS6KA2, MTAP9, BUB1B, SETD8, PAFAH1B1, CLASP1, MAPRE1, CLASP2, ANAPC7, SMC1A, APC, ZW10	935	190	13588	1.75921	1	0.291019	18.1887
GOTERM_BP_FAT	GO:0003001~generation of a signal involved in cell-cell signaling	13	0.833868	0.0119619	SYT1, HTT, NRXN3, ILDR2, CACNB4, NRXN1, RPH3A, LIN7A, ACVR2B, DGAT1, P2RX1, SYN2, VAMP2	935	84	13588	2.2491	1	0.304431	19.2881
GOTERM_BP_FAT	GO:0006468~protein amino acid phosphorylation	60	3.84862	0.0122792	PRPF4B, CAD, RPS6KB1, AURKB, PRKG1, C230081A13RIK, INSRR, MAP3K7, CSNK2A1, CDK12, MOS, PIK3CA, TLK1, PRKACB, BRD4, PRKCA, EGFR, SRPK2, MADD, WNK1, STK4, STK3, MAST4, BC021891, ACVR2B, CCND1, EIF2AK1, BAZ1B, HIPK1, RIOK3, EIF2S1, CAMK1, BUB1B, STK11, NEK1, STK17B, BMPR2, CHEK1, IRAK4, MAP3K2, SPNB2, TNKS, PRKAA2, DCLK1, PIK3R1, TAOK1, FLT4, PTPRA, MET, TAOK3, IGH-6, PTPN11, GLYCTK, RPS6KA2, RSRC1,…	935	640	13588	1.36243	1	0.308312	19.7484
GOTERM_BP_FAT	GO:0008284~positive regulation of cell proliferation	31	1.98845	0.0122963	PAX6, FGF10, TLR4, PDX1, PAX3, ZFP91, POU3F2, SPN, EGFR, IRS2, NACC1, IL2RA, FLT4, ESR1, LIFR, IGF1, IGH-6, TNS3, NOTCH1, CNTF, CDKN1B, CD80, HIPK1, NOTCH4, VEGFA, PBX1, CHRNB2, IL12B, MDM4, RBPJ, TBX18, MED1	935	284	13588	1.58631	1	0.30589	19.7732
GOTERM_BP_FAT	GO:0016197~endosome transport	7	0.449006	0.0125809	CHMP5, HTT, VPS54, LRBA, IGH-6, HOOK3, RHOBTB3	935	29	13588	3.50787	1	0.308998	20.1838
GOTERM_BP_FAT	GO:0007167~enzyme linked receptor protein signaling pathway	30	1.92431	0.0126835	ZFAND5, 2610005L07RIK, BMPR2, FGF10, PTEN, PDAP1, INSRR, MAP3K7, PHIP, UTP11L, SPNB2, PALM2, PIK3R1, CLEC2I, EGFR, IRS2, FLT4, ARID5B, MET, PTPRA, IGF1, PTPN11, ZFP826, SS18, ACVR2B, VEGFA, JAK1, TGFBR3, PPM1L, AKAP4	935	273	13588	1.59699	1	0.308354	20.3313
GOTERM_BP_FAT	GO:0080135~regulation of cellular response to stress	12	0.769724	0.0130563	EYA3, MAP3K7, KLK8, EIF2AK1, BRCC3, BECN1, USP1, MAPK8IP2, TLR3, MAPK8IP3, RNF168, TLR4	935	75	13588	2.32522	1	0.313117	20.8653
GOTERM_BP_FAT	GO:0006413~translational initiation	8	0.513149	0.0137022	EIF3C, TRMT6, EIF3E, EIF2S2, EIF5, EIF3L, DENR, EIF4E2	935	38	13588	3.0595	1	0.323074	21.7824
GOTERM_BP_FAT	GO:0016569~covalent chromatin modification	14	0.898012	0.0140168	DNMT3A, BRCC3, CREBBP, UBE2B, EYA3, MLL5, BAZ1B, RNF168, MLL3, BAZ2A, MYSM1, BRD8, MYST3, SUV420H1	935	96	13588	2.11934	1	0.326389	22.2255
GOTERM_BP_FAT	GO:0000087~M phase of mitotic cell cycle	23	1.4753	0.0140682	HAUS4, CKAP5, NEK1, AURKB, CDC16, CEP63, HMGA2, 9130404D08RIK, NCAPD3, MIS12, TIMELESS, RPS6KA2, MTAP9, BUB1B, SETD8, PAFAH1B1, CLASP1, MAPRE1, CLASP2, ANAPC7, SMC1A, APC, ZW10	935	194	13588	1.72294	1	0.324643	22.2976
GOTERM_BP_FAT	GO:0034622~cellular macromolecular complex assembly	25	1.60359	0.0142133	TDRD3, MTSS1, DICER1, TUBA3A, RBM5, CENPA, HJURP, TUBE1, HIST3H2A, KPNB1, TNPO1, MYST3, CLEC2I, H1F0, SRPK2, MBNL1, IPO8, MBD2, MIS12, HIST1H1T, PSMG2, HIST2H2BE, HIST1H3B, XPO7, HIST1H3H	935	217	13588	1.67427	1	0.324691	22.501
GOTERM_BP_FAT	GO:0000077~DNA damage checkpoint	7	0.449006	0.0148351	CCND1, BRCC3, MAPK14, RINT1, CHEK1, CEP63, PTPN11	935	30	13588	3.39094	1	0.33355	23.3668
GOTERM_BP_FAT	GO:0035265~organ growth	6	0.384862	0.0149692	ACVR2B, RXRA, TGFBR3, FGF10, MTAP7, PTPN11	935	22	13588	3.96344	1	0.333312	23.5524
GOTERM_BP_FAT	GO:0042770~DNA damage response, signal transduction	10	0.641437	0.0150279	XPA, CCND1, BRCC3, HIPK1, MAPK14, RINT1, CHEK1, CEP63, SMC1A, PTPN11	935	57	13588	2.54958	1	0.331716	23.6335
GOTERM_BP_FAT	GO:0032504~multicellular organism reproduction	41	2.62989	0.0151096	RAD23B, BBS4, UBE3A, DZIP1, STYX, HK2, RPS6KB1, ZBTB16, NR2C2, TAF7L, ATP2B2, TCP11, HSF2, PIWIL2, PAFAH1B1, ODF2, MTAP7, PCYT1B, SPATA5, FANCC, DNMT3A, HTT, MET, ESR1, PDE3A, HERC2, MBD2, UBE2B, PTPN11, AFP, MICALCL, CCND1, HIST1H1T, GMCL1, P2RX1, RPS6KA2, VEGFA, PSME4, GGNBP2, XRN2, MED1	935	409	13588	1.45682	1	0.330562	23.7462
GOTERM_BP_FAT	GO:0048609~reproductive process in a multicellular organism	41	2.62989	0.0151096	RAD23B, BBS4, UBE3A, DZIP1, STYX, HK2, RPS6KB1, ZBTB16, NR2C2, TAF7L, ATP2B2, TCP11, HSF2, PIWIL2, PAFAH1B1, ODF2, MTAP7, PCYT1B, SPATA5, FANCC, DNMT3A, HTT, MET, ESR1, PDE3A, HERC2, MBD2, UBE2B, PTPN11, AFP, MICALCL, CCND1, HIST1H1T, GMCL1, P2RX1, RPS6KA2, VEGFA, PSME4, GGNBP2, XRN2, MED1	935	409	13588	1.45682	1	0.330562	23.7462
GOTERM_BP_FAT	GO:0030850~prostate gland development	8	0.513149	0.0157371	NOTCH1, UBE3A, RXRA, ESR1, IGF1, SOX9, PTEN, CYP19A1	935	39	13588	2.98105	1	0.339063	24.6067
GOTERM_BP_FAT	GO:0030111~regulation of Wnt receptor signaling pathway	8	0.513149	0.0157371	CCND1, CHD8, STK11, SOX4, FGF10, MBD2, WWOX, APC	935	39	13588	2.98105	1	0.339063	24.6067
GOTERM_BP_FAT	GO:0035264~multicellular organism growth	8	0.513149	0.0157371	ZFP826, SLC1A2, ARID5B, ANKRD11, IGF1, PCDH15, TNKS2, ADD1	935	39	13588	2.98105	1	0.339063	24.6067
GOTERM_BP_FAT	GO:0048285~organelle fission	23	1.4753	0.0165686	HAUS4, CKAP5, NEK1, AURKB, CDC16, CEP63, HMGA2, 9130404D08RIK, NCAPD3, MIS12, TIMELESS, RPS6KA2, MTAP9, BUB1B, SETD8, PAFAH1B1, CLASP1, MAPRE1, CLASP2, ANAPC7, SMC1A, APC, ZW10	935	197	13588	1.6967	1	0.350795	25.7328
GOTERM_BP_FAT	GO:0048666~neuron development	31	1.98845	0.0177475	DCC, BBS4, CDK5R1, ENAH, PAX6, RORB, PRKG1, PTEN, NRCAM, ZFP91, ATP2B2, ANK3, ETV4, DCLK1, APC, SCLT1, KLK8, HTT, KIF5C, STXBP1, PCDH15, PTPN11, SLITRK2, NOTCH1, CNTF, MIAT, MTAP1B, VEGFA, MAPK8IP3, 2610109H07RIK, CHRNB2, DST	935	292	13588	1.54285	1	0.367866	27.3023
GOTERM_BP_FAT	GO:0034621~cellular macromolecular complex subunit organization	27	1.73188	0.0180082	TDRD3, MTSS1, ENAH, TUBA3A, DICER1, RBM5, CENPA, HJURP, TUBE1, HIST3H2A, TNPO1, KPNB1, MYST3, CLEC2I, H1F0, SRPK2, MBNL1, IPO8, MBD2, MIS12, HIST1H1T, PSMG2, HIST2H2BE, HIST1H3B, XPO7, XRN2, HIST1H3H	935	245	13588	1.60155	1	0.369411	27.645
GOTERM_BP_FAT	GO:0048008~platelet-derived growth factor receptor signaling pathway	6	0.384862	0.0180713	2610005L07RIK, ZFAND5, ZFP826, ARID5B, PTEN, PDAP1	935	23	13588	3.79112	1	0.367735	27.7278
GOTERM_BP_FAT	GO:0000904~cell morphogenesis involved in differentiation	24	1.53945	0.0198472	DCC, CDK5R1, ENAH, CRYAA, KIF5C, STXBP1, PAX6, PCDH15, SOX9, PTPN11, SLITRK2, NRCAM, ATP2B2, NOTCH1, ANK3, MAPK8IP3, 2610109H07RIK, CHRNB2, RBPJ, DST, DCLK1, ETV4, APC, HNRNPAB	935	212	13588	1.6452	1	0.393063	30.0202
GOTERM_BP_FAT	GO:0031111~negative regulation of microtubule polymerization or depolymerization	5	0.320718	0.0207377	MTAP1B, CLASP1, MAPRE1, CLASP2, APC	935	16	13588	4.54144	1	0.403827	31.1437
GOTERM_BP_FAT	GO:0010558~negative regulation of macromolecule biosynthetic process	41	2.62989	0.0208283	BCLAF1, ZBTB16, PAX3, PDX1, SOX9, ZC3H8, CBX5, MSX3, SIN3A, TIA1, BCOR, TCF25, BAZ2A, HNRNPAB, ALX1, MYST3, TBL1XR1, DNMT3A, ZBTB7A, NACC1, KLF12, IRF2BP2, ANKHD1, MBD2, UBE2B, PA2G4, EIF2AK1, TIMELESS, BPTF, HIPK1, TRPS1, BACE2, NAB2, BCL6B, ZFP281, MDM4, LRCH4, RBPJ, CUX1, NCOR1, EIF2C3	935	418	13588	1.42545	1	0.402397	31.2571
GOTERM_BP_FAT	GO:0031327~negative regulation of cellular biosynthetic process	42	2.69403	0.0208863	BCLAF1, ZBTB16, PAX3, PDX1, SOX9, ZC3H8, CBX5, MSX3, SIN3A, TIA1, BCOR, TCF25, BAZ2A, HNRNPAB, ALX1, MYST3, TBL1XR1, DNMT3A, ZBTB7A, NACC1, KLF12, IRF2BP2, ANKHD1, MBD2, UBE2B, PA2G4, EIF2AK1, GCK, BPTF, HIPK1, TIMELESS, TRPS1, BACE2, NAB2, BCL6B, ZFP281, MDM4, LRCH4, RBPJ, CUX1, NCOR1, EIF2C3	935	430	13588	1.41947	1	0.400506	31.3296
GOTERM_BP_FAT	GO:0048729~tissue morphogenesis	26	1.66774	0.0224779	BBS4, ENAH, BMPR2, FGF10, FKBP1A, PDX1, PAX3, SOX9, MAP3K7, TRAF6, ETV4, ALX1, EGFR, HTT, RXRA, ESR1, IGF1, PCDH15, NOTCH1, HOXB2, TIMELESS, PHB2, TGFBR3, PBX1, TBX18, MED1	935	238	13588	1.5876	1	0.420871	33.2904
GOTERM_BP_FAT	GO:0001655~urogenital system development	18	1.15459	0.0226655	UBE3A, RXRA, ARID5B, ESR1, SIX2, IGF1, ZBTB16, RRM2B, SOX9, PTEN, ZFP826, NOTCH1, ACVR2B, TIMELESS, PCSK9, PBX1, APC, CYP19A1	935	146	13588	1.79169	1	0.420743	33.518
GOTERM_BP_FAT	GO:0048872~homeostasis of number of cells	15	0.962155	0.0227189	IL2RA, VPS54, PIK3CD, ILDR2, IL7R, ZC3H8, MLL5, LILRB3, VEGFA, TGFBR3, MTAP7, ACIN1, NCOR1, ADD1, FANCC	935	113	13588	1.92911	1	0.418736	33.5826
GOTERM_BP_FAT	GO:0043388~positive regulation of DNA binding	8	0.513149	0.0231124	HIPK1, CREBBP, TGFBR3, TLR3, TLR4, BRD4, CALM1, JMY	935	42	13588	2.76812	1	0.42149	34.0572
GOTERM_BP_FAT	GO:0031570~DNA integrity checkpoint	7	0.449006	0.0232436	CCND1, BRCC3, MAPK14, RINT1, CHEK1, CEP63, PTPN11	935	33	13588	3.08268	1	0.420586	34.2147
GOTERM_BP_FAT	GO:0030705~cytoskeleton-dependent intracellular transport	7	0.449006	0.0232436	SPG7, KIF1B, KIF5B, HTT, RHOT1, PAFAH1B1, DST	935	33	13588	3.08268	1	0.420586	34.2147
GOTERM_BP_FAT	GO:0007169~transmembrane receptor protein tyrosine kinase signaling pathway	22	1.41116	0.0232858	EGFR, ZFAND5, 2610005L07RIK, IRS2, FLT4, ARID5B, MET, PTPRA, BMPR2, IGF1, FGF10, PTEN, PDAP1, INSRR, PTPN11, PHIP, ZFP826, SS18, UTP11L, VEGFA, PIK3R1, CLEC2I	935	192	13588	1.6652	1	0.418478	34.2653
GOTERM_BP_FAT	GO:0016570~histone modification	13	0.833868	0.0233448	BRCC3, CREBBP, UBE2B, EYA3, MLL5, BAZ1B, RNF168, MLL3, BAZ2A, MYSM1, BRD8, MYST3, SUV420H1	935	92	13588	2.05352	1	0.416628	34.336
GOTERM_BP_FAT	GO:0009890~negative regulation of biosynthetic process	42	2.69403	0.0234362	BCLAF1, ZBTB16, PAX3, PDX1, SOX9, ZC3H8, CBX5, MSX3, SIN3A, TIA1, BCOR, TCF25, BAZ2A, HNRNPAB, ALX1, MYST3, TBL1XR1, DNMT3A, ZBTB7A, NACC1, KLF12, IRF2BP2, ANKHD1, MBD2, UBE2B, PA2G4, EIF2AK1, GCK, BPTF, HIPK1, TIMELESS, TRPS1, BACE2, NAB2, BCL6B, ZFP281, MDM4, LRCH4, RBPJ, CUX1, NCOR1, EIF2C3	935	434	13588	1.40638	1	0.415242	34.4454
GOTERM_BP_FAT	GO:0010629~negative regulation of gene expression	40	2.56575	0.0243335	BCLAF1, DICER1, ZBTB16, PAX3, PDX1, SOX9, ZC3H8, CBX5, MSX3, SIN3A, PIWIL2, BCOR, BAZ2A, TCF25, HNRNPAB, ALX1, MYST3, TBL1XR1, ZBTB7A, DNMT3A, NACC1, KLF12, IRF2BP2, MBD2, UBE2B, KCNQ1OT1, PA2G4, TIMELESS, BPTF, HIPK1, TRPS1, NAB2, BCL6B, ZFP281, MDM4, LRCH4, RBPJ, CUX1, NCOR1, EIF2C3	935	410	13588	1.41782	1	0.424634	35.5096
GOTERM_BP_FAT	GO:0034754~cellular hormone metabolic process	9	0.577293	0.0245608	RDH12, AFP, STAR, CYP11A1, ESR1, SRD5A1, BCO2, CYP19A1, RETSAT	935	52	13588	2.51526	1	0.42501	35.7766
GOTERM_BP_FAT	GO:0006886~intracellular protein transport	29	1.86017	0.0248152	COPA, GRPEL2, CLTB, NAPG, STAM2, FGF10, NUP214, GCKR, STX17, SPNB2, CHM, TPR, TNPO1, KPNB1, ASPSCR1, SRP54A, HTT, SRP54B, SNUPN, SRP54C, DNHD1, SIX2, TOMM40, IPO8, RPH3A, VTI1A, YWHAG, NOP58, XPO7, KPNA2, KPNA1	935	276	13588	1.52698	1	0.425733	36.0742
GOTERM_BP_FAT	GO:0048754~branching morphogenesis of a tube	13	0.833868	0.0251913	GNA13, DICER1, ESR1, FGF10, IGF1, NOTCH1, TIMELESS, PHB2, VEGFA, NOTCH4, PBX1, ETV4, MED1	935	93	13588	2.03144	1	0.42801	36.5118
GOTERM_BP_FAT	GO:0060688~regulation of morphogenesis of a branching structure	6	0.384862	0.0254793	RXRA, PHB2, MET, ESR1, FGF10, ETV4	935	25	13588	3.48783	1	0.429124	36.845
GOTERM_BP_FAT	GO:0016310~phosphorylation	64	4.1052	0.025906	PRPF4B, CAD, RPS6KB1, AURKB, PRKG1, C230081A13RIK, INSRR, MAP3K7, CSNK2A1, CDK12, MOS, PIK3CA, TLK1, PRKACB, BRD4, PRKCA, EGFR, SRPK2, MADD, PIK3CD, WNK1, STK4, STK3, MAST4, BC021891, ACVR2B, CCND1, EIF2AK1, BAZ1B, HIPK1, RIOK3, EIF2S1, CAMK1, BUB1B, STK11, NEK1, HK2, STK17B, BMPR2, CHEK1, SDHAF2, IRAK4, MAP3K2, SPNB2, TNKS, PRKAA2, DCLK1, PIK3R1, TAOK1, FLT4, PTPRA, MET, TAOK3, IGH-6, PTPN11, GL…	935	718	13588	1.29539	1	0.431964	37.3356
GOTERM_BP_FAT	GO:0060768~regulation of epithelial cell proliferation involved in prostate gland development	4	0.256575	0.026967	NOTCH1, CDKN1B, STK11, APC	935	10	13588	5.81305	1	0.442568	38.5399
GOTERM_BP_FAT	GO:0035162~embryonic hemopoiesis	4	0.256575	0.026967	VEGFA, PBX1, MED1, MYST3	935	10	13588	5.81305	1	0.442568	38.5399
GOTERM_BP_FAT	GO:0022403~cell cycle phase	33	2.11674	0.0283213	HAUS4, PPP2R3A, NEK1, CHEK1, AURKB, CDC16, ZFP318, SIN3A, PMS2, MTAP9, PIWIL2, PAFAH1B1, CLASP1, CLASP2, APC, ZW10, CRYAA, CKAP5, CEP63, HMGA2, 9130404D08RIK, UBE2B, NCAPD3, MIS12, CCND1, PPM1D, TIMELESS, RPS6KA2, BUB1B, SETD8, MAPRE1, ANAPC7, SMC1A	935	328	13588	1.46212	1	0.456319	40.0455
GOTERM_BP_FAT	GO:0043242~negative regulation of protein complex disassembly	7	0.449006	0.030341	SPNB2, MTAP1B, TMOD3, CLASP1, RDX, CLASP2, APC	935	35	13588	2.90652	1	0.47715	42.2262
GOTERM_BP_FAT	GO:0010605~negative regulation of macromolecule metabolic process	47	3.01475	0.0313031	BCLAF1, DICER1, FKBP1A, ZBTB16, PAX3, PDX1, SOX9, ZC3H8, CBX5, MSX3, SIN3A, INPP5K, TIA1, PIWIL2, BCOR, TCF25, BAZ2A, HNRNPAB, ALX1, MYST3, PRKCA, TBL1XR1, DNMT3A, ZBTB7A, NACC1, KLF12, IRF2BP2, ANKHD1, MBD2, UBE2B, KCNQ1OT1, PA2G4, EIF2AK1, TIMELESS, BPTF, HIPK1, NAB2, TRPS1, BACE2, BCL6B, ZFP281, MDM4, LRCH4, RBPJ, CUX1, NCOR1, EIF2C3	935	506	13588	1.34987	1	0.485317	43.2384
GOTERM_BP_FAT	GO:0051099~positive regulation of binding	8	0.513149	0.032578	HIPK1, CREBBP, TGFBR3, TLR3, TLR4, BRD4, CALM1, JMY	935	45	13588	2.58358	1	0.496629	44.554
GOTERM_BP_FAT	GO:0032886~regulation of microtubule-based process	8	0.513149	0.032578	BBS4, CDKN1B, MTAP1B, CLASP1, MAPRE1, CLASP2, DST, APC	935	45	13588	2.58358	1	0.496629	44.554
GOTERM_BP_FAT	GO:0030879~mammary gland development	12	0.769724	0.0330825	ATP2B2, CCND1, IRS2, PHB2, MET, VEGFA, ESR1, HK2, IGF1, FGF10, ETV4, MED1	935	86	13588	2.02781	1	0.499404	45.0666
GOTERM_BP_FAT	GO:0008283~cell proliferation	26	1.66774	0.0333836	FGF10, DPH1, FKBP1A, PAX3, IL7R, SOX9, NR2C2, NAA35, COL4A3BP, WDR12, POU3F2, PAFAH1B1, MTAP7, LHX9, SETDB1, KLK8, IRS2, RXRA, MET, CREBBP, ESR1, CCND1, VEGFA, TGFBR3, MDM4, MED1	935	247	13588	1.52975	1	0.499982	45.3704
GOTERM_BP_FAT	GO:0007269~neurotransmitter secretion	7	0.449006	0.0343676	SYT1, NRXN3, SYN2, VAMP2, NRXN1, RPH3A, LIN7A	935	36	13588	2.82579	1	0.507655	46.3523
GOTERM_BP_FAT	GO:0070507~regulation of microtubule cytoskeleton organization	7	0.449006	0.0343676	CDKN1B, MTAP1B, CLASP1, MAPRE1, CLASP2, DST, APC	935	36	13588	2.82579	1	0.507655	46.3523
GOTERM_BP_FAT	GO:0032990~cell part morphogenesis	23	1.4753	0.0346897	DCC, BBS4, KLK8, CDK5R1, ENAH, KIF5C, STXBP1, PAX6, PCDH15, TTLL3, PTPN11, SLITRK2, NRCAM, NOTCH1, ANK3, COL4A3BP, MAPK8IP3, 2610109H07RIK, CHRNB2, DST, ETV4, DCLK1, APC	935	212	13588	1.57665	1	0.508374	46.67
GOTERM_BP_FAT	GO:0016481~negative regulation of transcription	36	2.30917	0.0364933	BCLAF1, ZBTB16, PAX3, PDX1, SOX9, ZC3H8, CBX5, MSX3, SIN3A, BCOR, BAZ2A, TCF25, HNRNPAB, ALX1, MYST3, TBL1XR1, ZBTB7A, DNMT3A, NACC1, KLF12, IRF2BP2, MBD2, UBE2B, PA2G4, TIMELESS, BPTF, HIPK1, TRPS1, NAB2, BCL6B, ZFP281, MDM4, LRCH4, RBPJ, CUX1, NCOR1	935	372	13588	1.40638	1	0.523911	48.4168
GOTERM_BP_FAT	GO:0048858~cell projection morphogenesis	22	1.41116	0.0377734	DCC, BBS4, KLK8, CDK5R1, ENAH, KIF5C, STXBP1, PAX6, PCDH15, TTLL3, PTPN11, SLITRK2, NRCAM, NOTCH1, ANK3, MAPK8IP3, 2610109H07RIK, CHRNB2, DST, DCLK1, ETV4, APC	935	202	13588	1.58276	1	0.533772	49.6235
GOTERM_BP_FAT	GO:0051726~regulation of cell cycle	23	1.4753	0.0379295	BRCC3, COPS5, MADD, RINT1, ESR1, CHEK1, PDE3A, INTS3, HERC2, CEP63, PTEN, UBE2B, GPR3, PTPN11, CCND1, NUP214, CDKN1B, PSMG2, MAPK14, SMC1A, LTB, APC, ZW10	935	214	13588	1.56192	1	0.532681	49.7689
GOTERM_BP_FAT	GO:0040012~regulation of locomotion	14	0.898012	0.0384423	GNA13, PRKCA, BBS4, IRS2, PAX6, SCAI, FGF10, CBLL1, PTEN, LAMA4, TGFBR3, TSHR, PIK3R1, APC	935	110	13588	1.84961	1	0.534983	50.2434
GOTERM_BP_FAT	GO:0051493~regulation of cytoskeleton organization	13	0.833868	0.0385682	RDX, RICTOR, CDKN1B, SPNB2, MTAP1B, TMOD3, CLASP1, CLASP2, MAPRE1, DST, RASA1, CLEC2I, APC	935	99	13588	1.90832	1	0.53362	50.3594
GOTERM_BP_FAT	GO:0030182~neuron differentiation	38	2.43746	0.0386031	DCC, BBS4, CDK5R1, ENAH, SOX5, PAX6, RORB, PAX3, PRKG1, PTEN, NRCAM, ZFP91, ATP2B2, ANK3, PCSK9, POU3F2, ETV4, DCLK1, APC, SCLT1, KLK8, HTT, KIF5C, GSX1, STXBP1, PCDH15, PTPN11, SLITRK2, NOTCH1, CNTF, MIAT, MTAP1B, VEGFA, 2610109H07RIK, MAPK8IP3, CHRNB2, RBPJ, CUX1, DST	935	399	13588	1.38406	1	0.531417	50.3914
GOTERM_BP_FAT	GO:0000398~nuclear mRNA splicing, via spliceosome	7	0.449006	0.0387234	SRPK2, TDRD3, RSRC1, TRA2B, RBM5, SRRM1, MBNL1	935	37	13588	2.74941	1	0.530034	50.5018
GOTERM_BP_FAT	GO:0000375~RNA splicing, via transesterification reactions	7	0.449006	0.0387234	SRPK2, TDRD3, RSRC1, TRA2B, RBM5, SRRM1, MBNL1	935	37	13588	2.74941	1	0.530034	50.5018
GOTERM_BP_FAT	GO:0000377~RNA splicing, via transesterification reactions with bulged adenosine as nucleophile	7	0.449006	0.0387234	SRPK2, TDRD3, RSRC1, TRA2B, RBM5, SRRM1, MBNL1	935	37	13588	2.74941	1	0.530034	50.5018
GOTERM_BP_FAT	GO:0032271~regulation of protein polymerization	9	0.577293	0.0400201	CDKN1B, SPNB2, TMOD3, RDX, MAPRE1, RICTOR, RASA1, CLEC2I, APC	935	57	13588	2.29462	1	0.539501	51.6774
GOTERM_BP_FAT	GO:0065003~macromolecular complex assembly	33	2.11674	0.0406216	TDRD3, MTSS1, TUBA3A, DICER1, H2-D1, RBM5, PDSS2, TAF7L, GTF2A1, HJURP, CENPA, TUBE1, HIST3H2A, TNPO1, KPNB1, APC, MYST3, ZW10, CLEC2I, H1F0, SRPK2, NACC1, H2-L, IPO8, MBNL1, MBD2, MIS12, HIST1H1T, PSMG2, SBF2, HIST2H2BE, HIST1H3B, XPO7, HIST1H3H	935	338	13588	1.41887	1	0.542454	52.2137
GOTERM_BP_FAT	GO:0033599~regulation of mammary gland epithelial cell proliferation	3	0.192431	0.0410516	PHB2, ETV4, MED1	935	5	13588	8.71957	1	0.543825	52.5937
GOTERM_BP_FAT	GO:0044087~regulation of cellular component biogenesis	12	0.769724	0.0410883	BBS4, CDKN1B, SPNB2, TMOD3, CHRNB2, RDX, MAPRE1, RICTOR, PTEN, RASA1, CLEC2I, APC	935	89	13588	1.95945	1	0.541692	52.626
GOTERM_BP_FAT	GO:0016477~cell migration	25	1.60359	0.0411851	PVR, DCC, 2610005L07RIK, ZFAND5, CDK5R1, PLXNA2, S100A9, PAX6, FGF10, PAX3, PRKG1, PTEN, POU3F2, PAFAH1B1, CLASP2, DCLK1, APC, EGFR, PRKCA, ARID5B, MET, ITGA4, ZFP826, TNS3, VEGFA	935	240	13588	1.51381	1	0.540112	52.7111
GOTERM_BP_FAT	GO:0032259~methylation	11	0.705581	0.0435509	DNMT3A, MLL5, PIWIL2, ILF3, MLL3, TGS1, FTSJ1, BAZ2A, KCNQ1OT1, SUV420H1, N6AMT1	935	79	13588	2.02353	1	0.558176	54.7462
GOTERM_BP_FAT	GO:0006323~DNA packaging	13	0.833868	0.043968	H1F0, AIFM2, NCAPD3, HIST1H1T, CENPA, HJURP, HIST2H2BE, SMARCC1, HIST1H3B, HIST3H2A, ACIN1, HIST1H3H, MYST3	935	101	13588	1.87054	1	0.559264	55.0963
GOTERM_BP_FAT	GO:0007018~microtubule-based movement	13	0.833868	0.043968	KIF22, SPG7, KIF5B, HTT, KIF5C, TUBA3A, KIF13A, KIF1B, RHOT1, TUBE1, PAFAH1B1, DST, KIF13B	935	101	13588	1.87054	1	0.559264	55.0963
GOTERM_BP_FAT	GO:0051494~negative regulation of cytoskeleton organization	8	0.513149	0.0443308	SPNB2, MTAP1B, TMOD3, CLASP1, RDX, MAPRE1, CLASP2, APC	935	48	13588	2.4221	1	0.559884	55.3988
GOTERM_BP_FAT	GO:0060525~prostate glandular acinus development	4	0.256575	0.0446216	NOTCH1, RXRA, ESR1, IGF1	935	12	13588	4.84421	1	0.5599	55.6398
GOTERM_BP_FAT	GO:0048667~cell morphogenesis involved in neuron differentiation	20	1.28287	0.0448378	DCC, CDK5R1, ENAH, KIF5C, STXBP1, PAX6, PCDH15, PTPN11, SLITRK2, NRCAM, ATP2B2, NOTCH1, ANK3, 2610109H07RIK, MAPK8IP3, CHRNB2, DST, DCLK1, ETV4, APC	935	182	13588	1.59699	1	0.559302	55.8182
GOTERM_BP_FAT	GO:0031175~neuron projection development	23	1.4753	0.0450724	DCC, BBS4, KLK8, CDK5R1, ENAH, KIF5C, STXBP1, PAX6, PRKG1, PTEN, PTPN11, SLITRK2, NRCAM, NOTCH1, ANK3, MTAP1B, 2610109H07RIK, MAPK8IP3, CHRNB2, DST, DCLK1, ETV4, APC	935	218	13588	1.53326	1	0.558863	56.0111
GOTERM_BP_FAT	GO:0043933~macromolecular complex subunit organization	35	2.24503	0.0461998	MTSS1, TDRD3, ENAH, TUBA3A, DICER1, H2-D1, RBM5, PDSS2, TAF7L, GTF2A1, HJURP, CENPA, TUBE1, HIST3H2A, TNPO1, KPNB1, APC, MYST3, ZW10, CLEC2I, H1F0, SRPK2, NACC1, H2-L, IPO8, MBNL1, MBD2, MIS12, HIST1H1T, PSMG2, SBF2, HIST2H2BE, HIST1H3B, XPO7, XRN2, HIST1H3H	935	367	13588	1.38594	1	0.565653	56.9268
GOTERM_BP_FAT	GO:0006928~cell motion	35	2.24503	0.0461998	PVR, DCC, ZFAND5, 2610005L07RIK, CDK5R1, ENAH, PLXNA2, S100A9, PAX6, FGF10, PAX3, PRKG1, PTEN, TAF7L, NRCAM, ANK3, PAFAH1B1, POU3F2, CLASP2, ETV4, DCLK1, APC, PRKCA, EGFR, ARID5B, KIF5C, MET, ITGA4, TNS3, ZFP826, HIST1H1T, VEGFA, MAPK8IP3, 2610109H07RIK, AKAP4	935	367	13588	1.38594	1	0.565653	56.9268
GOTERM_BP_FAT	GO:0035239~tube morphogenesis	19	1.21873	0.0466233	GNA13, BBS4, ENAH, DICER1, ESR1, IGF1, FGF10, PAX3, MAP3K7, NOTCH1, TIMELESS, PHB2, NOTCH4, VEGFA, PBX1, TRAF6, ETV4, ALX1, MED1	935	171	13588	1.61474	1	0.566694	57.266
GOTERM_BP_FAT	GO:0010608~posttranscriptional regulation of gene expression	17	1.09044	0.047692	DICER1, STXBP1, SOX4, ANKHD1, PTEN, EIF4G1, PA2G4, EIF2AK1, TRMT6, TIA1, EIF2S1, VEGFA, SEPSECS, PIWIL2, PUM2, EIF2C3, EIF4E2	935	148	13588	1.66929	1	0.572786	58.111
GOTERM_BP_FAT	GO:0022613~ribonucleoprotein complex biogenesis	16	1.0263	0.0492396	SRPK2, TDRD3, SDAD1, RRP1, EXOSC4, DICER1, RBM5, WBP11, MBNL1, UTP11L, PA2G4, RRP1B, WDR12, NOP58, FTSJ1, UTP14A	935	137	13588	1.69724	1	0.582378	59.3068
GOTERM_BP_FAT	GO:0030030~cell projection organization	31	1.98845	0.0494134	DCC, BBS4, MTSS1, CDK5R1, ENAH, PAX6, RDX, PRKG1, PTEN, TTLL3, NRCAM, ATP2B2, ANK3, DCLK1, ETV4, APC, KLK8, TTC30A1, KIF5C, STXBP1, PCDH15, UBE2B, PTPN11, SLITRK2, NOTCH1, MTAP1B, MAPK8IP3, 2610109H07RIK, CHRNB2, DST, AKAP4	935	319	13588	1.41226	1	0.581381	59.4391
GOTERM_BP_FAT	GO:0008202~steroid metabolic process	18	1.15459	0.0508216	SC5D, HDLBP, STAR, CYP11A1, OSBPL9, SORL1, ESR1, SC4MOL, AFP, ACBD3, PCSK9, PBX1, SRD5A1, PRKAA2, HSD17B7, CYP19A1, FABP6, DHCR24	935	161	13588	1.62477	1	0.589603	60.4958
GOTERM_BP_FAT	GO:0002520~immune system development	29	1.86017	0.0513405	XRCC6, FGF10, SOX4, CACNB4, ZBTB16, IL7R, VPS33A, MLL5, PMS2, ACIN1, TRAF6, LTB, PIK3R1, SPN, MYST3, APC, THEMIS, ZFP826, LILRB3, VEGFA, TGFBR3, PBX1, IL12B, RBPJ, TSHR, NCOR1, ADD2, MED1, ADD1	935	295	13588	1.42863	1	0.591125	60.8786
GOTERM_BP_FAT	GO:0042462~eye photoreceptor cell development	5	0.320718	0.0519922	BBS4, MIAT, VEGFA, PAX6, RORB	935	21	13588	3.46015	1	0.593583	61.3543
GOTERM_BP_FAT	GO:0060322~head development	5	0.320718	0.0519922	ZFAND5, ZFP826, ARID5B, ANKRD11, ITGA4	935	21	13588	3.46015	1	0.593583	61.3543
GOTERM_BP_FAT	GO:0000279~M phase	28	1.79602	0.0521446	HAUS4, NEK1, AURKB, CDC16, ZFP318, PMS2, MTAP9, PIWIL2, CLASP1, PAFAH1B1, CLASP2, ZW10, APC, CRYAA, CKAP5, CEP63, HMGA2, 9130404D08RIK, UBE2B, NCAPD3, MIS12, TIMELESS, RPS6KA2, BUB1B, SETD8, MAPRE1, ANAPC7, SMC1A	935	283	13588	1.43786	1	0.592418	61.4648
GOTERM_BP_FAT	GO:0060429~epithelium development	27	1.73188	0.0528804	BBS4, ENAH, PAX6, FGF10, PDX1, PAX3, SOX9, MAP3K7, KCNE1, TRAF6, ETV4, ALX1, EGFR, HTT, RXRA, ESR1, IGF1, PCDH15, NOTCH1, HOXB2, TIMELESS, PHB2, VEGFA, PBX1, RBPJ, TBX18, MED1	935	271	13588	1.4479	1	0.595435	61.9941
GOTERM_BP_FAT	GO:0006694~steroid biosynthetic process	10	0.641437	0.0534133	ACBD3, SC5D, STAR, CYP11A1, PBX1, SRD5A1, PRKAA2, HSD17B7, SC4MOL, DHCR24	935	71	13588	2.04685	1	0.596969	62.373
GOTERM_BP_FAT	GO:0043414~biopolymer methylation	10	0.641437	0.0534133	DNMT3A, MLL5, PIWIL2, ILF3, MLL3, TGS1, FTSJ1, BAZ2A, KCNQ1OT1, SUV420H1	935	71	13588	2.04685	1	0.596969	62.373
GOTERM_BP_FAT	GO:0048870~cell motility	28	1.79602	0.0534337	PVR, DCC, ZFAND5, 2610005L07RIK, CDK5R1, PLXNA2, S100A9, PAX6, FGF10, PAX3, PRKG1, PTEN, TAF7L, POU3F2, PAFAH1B1, CLASP2, DCLK1, APC, EGFR, PRKCA, ARID5B, MET, ITGA4, ZFP826, TNS3, HIST1H1T, VEGFA, AKAP4	935	284	13588	1.43279	1	0.594887	62.3874
GOTERM_BP_FAT	GO:0051674~localization of cell	28	1.79602	0.0534337	PVR, DCC, ZFAND5, 2610005L07RIK, CDK5R1, PLXNA2, S100A9, PAX6, FGF10, PAX3, PRKG1, PTEN, TAF7L, POU3F2, PAFAH1B1, CLASP2, DCLK1, APC, EGFR, PRKCA, ARID5B, MET, ITGA4, ZFP826, TNS3, HIST1H1T, VEGFA, AKAP4	935	284	13588	1.43279	1	0.594887	62.3874
GOTERM_BP_FAT	GO:0033500~carbohydrate homeostasis	7	0.449006	0.0538242	ASPSCR1, GCKR, GCK, INPP5K, SOCS6, PDX1, PTPN11	935	40	13588	2.54321	1	0.595415	62.6628
GOTERM_BP_FAT	GO:0042593~glucose homeostasis	7	0.449006	0.0538242	ASPSCR1, GCKR, GCK, INPP5K, SOCS6, PDX1, PTPN11	935	40	13588	2.54321	1	0.595415	62.6628
GOTERM_BP_FAT	GO:0007409~axonogenesis	18	1.15459	0.0558938	DCC, CDK5R1, ENAH, KIF5C, STXBP1, PAX6, PTPN11, SLITRK2, NRCAM, NOTCH1, ANK3, 2610109H07RIK, MAPK8IP3, CHRNB2, DST, DCLK1, ETV4, APC	935	163	13588	1.60483	1	0.607444	64.0907
GOTERM_BP_FAT	GO:0007243~protein kinase cascade	24	1.53945	0.0569741	GNA13, PRKCA, CNKSR2, SRPK2, MADD, MET, STK17B, IGH-6, TLR4, RPS6KB1, STK3, PTPN11, MAP3K7, SS18, RPS6KA2, MAPK14, NOTCH4, MAPK8IP2, SPRED2, JAK1, MAPK8IP3, PIK3CA, PPM1L, SPRED1	935	236	13588	1.47789	1	0.61249	64.8153
GOTERM_BP_FAT	GO:0007595~lactation	6	0.384862	0.0581974	ATP2B2, CCND1, MET, VEGFA, HK2, MED1	935	31	13588	2.81277	1	0.618352	65.6192
GOTERM_BP_FAT	GO:0048812~neuron projection morphogenesis	19	1.21873	0.0586917	DCC, KLK8, CDK5R1, ENAH, KIF5C, STXBP1, PAX6, PTPN11, SLITRK2, NRCAM, NOTCH1, ANK3, 2610109H07RIK, MAPK8IP3, CHRNB2, DST, DCLK1, ETV4, APC	935	176	13588	1.56886	1	0.619388	65.9391
GOTERM_BP_FAT	GO:0030177~positive regulation of Wnt receptor signaling pathway	3	0.192431	0.0588119	SOX4, FGF10, MBD2	935	6	13588	7.26631	1	0.618007	66.0165
GOTERM_BP_FAT	GO:0019227~neuronal action potential propagation	3	0.192431	0.0588119	NRCAM, SCN1A, CACNB4	935	6	13588	7.26631	1	0.618007	66.0165
GOTERM_BP_FAT	GO:0035019~somatic stem cell maintenance	3	0.192431	0.0588119	TCF7L2, APC, MYST3	935	6	13588	7.26631	1	0.618007	66.0165
GOTERM_BP_FAT	GO:0001953~negative regulation of cell-matrix adhesion	3	0.192431	0.0588119	PTEN, PIK3R1, RASA1	935	6	13588	7.26631	1	0.618007	66.0165
GOTERM_BP_FAT	GO:0001678~cellular glucose homeostasis	3	0.192431	0.0588119	GCKR, GCK, SOCS6	935	6	13588	7.26631	1	0.618007	66.0165
GOTERM_BP_FAT	GO:0030856~regulation of epithelial cell differentiation	5	0.320718	0.0602195	CCND1, NOTCH1, NOTCH4, PAX6, APC	935	22	13588	3.30287	1	0.624832	66.9102
GOTERM_BP_FAT	GO:0035116~embryonic hindlimb morphogenesis	5	0.320718	0.0602195	NOTCH1, DICER1, GNAS, ZBTB16, MED1	935	22	13588	3.30287	1	0.624832	66.9102
GOTERM_BP_FAT	GO:0048286~lung alveolus development	5	0.320718	0.0602195	TNS3, VEGFA, BMPR2, FGF10, MAPK8IP3	935	22	13588	3.30287	1	0.624832	66.9102
GOTERM_BP_FAT	GO:0016192~vesicle-mediated transport	42	2.69403	0.0611053	COPA, CLTB, NAPG, CHMP5, UBE3A, VPS54, SORL1, LRBA, ITSN2, VPS33A, RIMS4, HOOK3, MIA3, STX17, SEC22A, RAB6B, SEC22C, RHOBTB3, ZW10, RAB2B, DNM3, HTT, RINT1, STXBP1, IGH-6, RPH3A, LIN7A, SCFD1, COG5, GAPVD1, P2RX1, TFRC, ARF3, SH3KBP1, RIN2, MAPK8IP3, VAMP2, CUX1, UNC13C, ANKFY1, CLCN5, EPN2	935	466	13588	1.30981	1	0.628243	67.4612
GOTERM_BP_FAT	GO:0019226~transmission of nerve impulse	23	1.4753	0.0622018	SYT1, KLK8, SCN1A, SCD2, NRXN3, STXBP1, CACNB4, NRXN1, RPH3A, LIN7A, NRCAM, GAD2, KIF1B, GLS, NAB2, PCDHB16, SYN2, TMOD2, PAFAH1B1, CHRNB2, POU3F2, VAMP2, UNC13C	935	226	13588	1.47898	1	0.632878	68.1312
GOTERM_BP_FAT	GO:0030097~hemopoiesis	25	1.60359	0.0629093	SOX4, CACNB4, ZBTB16, IL7R, VPS33A, MLL5, ACIN1, TRAF6, PIK3R1, SPN, MYST3, APC, THEMIS, ZFP826, LILRB3, VEGFA, TGFBR3, PBX1, IL12B, RBPJ, TSHR, NCOR1, ADD2, MED1, ADD1	935	251	13588	1.44747	1	0.635068	68.5566
GOTERM_BP_FAT	GO:0051270~regulation of cell motion	13	0.833868	0.0632445	GNA13, BBS4, IRS2, PAX6, SCAI, CBLL1, PTEN, LAMA4, CDKN1B, TMOD3, TGFBR3, PIK3R1, APC	935	107	13588	1.76565	1	0.634992	68.7563
GOTERM_BP_FAT	GO:0035295~tube development	26	1.66774	0.0641695	GNA13, BBS4, ENAH, DICER1, BMPR2, FGF10, PAX3, MAP3K7, CRISPLD2, TRAF6, ETV4, ALX1, ESR1, IGF1, CYP1A2, TNS3, NOTCH1, ACVR2B, TIMELESS, PHB2, VEGFA, NOTCH4, MAPK8IP3, PBX1, CUX1, MED1	935	264	13588	1.43124	1	0.638429	69.3012
GOTERM_BP_FAT	GO:0007026~negative regulation of microtubule depolymerization	4	0.256575	0.06669	MTAP1B, CLASP1, CLASP2, APC	935	14	13588	4.15218	1	0.651012	70.7406
GOTERM_BP_FAT	GO:0001837~epithelial to mesenchymal transition	4	0.256575	0.06669	NOTCH1, RBPJ, SOX9, HNRNPAB	935	14	13588	4.15218	1	0.651012	70.7406
GOTERM_BP_FAT	GO:0031114~regulation of microtubule depolymerization	4	0.256575	0.06669	MTAP1B, CLASP1, CLASP2, APC	935	14	13588	4.15218	1	0.651012	70.7406
GOTERM_BP_FAT	GO:0001754~eye photoreceptor cell differentiation	5	0.320718	0.0690928	BBS4, MIAT, VEGFA, PAX6, RORB	935	23	13588	3.15927	1	0.662414	72.0533
GOTERM_BP_FAT	GO:0006306~DNA methylation	5	0.320718	0.0690928	DNMT3A, MLL5, PIWIL2, BAZ2A, KCNQ1OT1	935	23	13588	3.15927	1	0.662414	72.0533
GOTERM_BP_FAT	GO:0006305~DNA alkylation	5	0.320718	0.0690928	DNMT3A, MLL5, PIWIL2, BAZ2A, KCNQ1OT1	935	23	13588	3.15927	1	0.662414	72.0533
GOTERM_BP_FAT	GO:0040014~regulation of multicellular organism growth	10	0.641437	0.0709324	ATXN2, ANKRD26, NMUR2, PIK3CA, POU3F2, TSHR, NCOR1, GH, TNKS2, PTPN11	935	75	13588	1.93768	1	0.670354	73.0205
GOTERM_BP_FAT	GO:0032869~cellular response to insulin stimulus	7	0.449006	0.0720421	PHIP, IRS2, STAR, PTPRA, PCSK9, PIK3R1, GH	935	43	13588	2.36578	1	0.67422	73.5886
GOTERM_BP_FAT	GO:0043244~regulation of protein complex disassembly	7	0.449006	0.0720421	SPNB2, MTAP1B, TMOD3, CLASP1, RDX, CLASP2, APC	935	43	13588	2.36578	1	0.67422	73.5886
GOTERM_BP_FAT	GO:0007283~spermatogenesis	25	1.60359	0.0725064	BBS4, RAD23B, DZIP1, STYX, ZBTB16, NR2C2, TAF7L, TCP11, HSF2, PIWIL2, ODF2, PAFAH1B1, PCYT1B, MTAP7, SPATA5, DNMT3A, HTT, HERC2, UBE2B, MICALCL, HIST1H1T, GMCL1, PSME4, GGNBP2, XRN2	935	255	13588	1.42477	1	0.674645	73.823
GOTERM_BP_FAT	GO:0048232~male gamete generation	25	1.60359	0.0725064	BBS4, RAD23B, DZIP1, STYX, ZBTB16, NR2C2, TAF7L, TCP11, HSF2, PIWIL2, ODF2, PAFAH1B1, PCYT1B, MTAP7, SPATA5, DNMT3A, HTT, HERC2, UBE2B, MICALCL, HIST1H1T, GMCL1, PSME4, GGNBP2, XRN2	935	255	13588	1.42477	1	0.674645	73.823
GOTERM_BP_FAT	GO:0042127~regulation of cell proliferation	47	3.01475	0.0729027	PPP2R3A, STK11, PAX6, FGF10, TLR4, ZBTB16, PAX3, PDX1, SOX9, PTEN, ZFP91, ADAM33, POU3F2, LTB, ETV4, SPN, APC, CLEC2I, PRKCA, EGFR, IRS2, NACC1, IL2RA, BECN1, FLT4, LIFR, ESR1, IGF1, IGH-6, MBD2, TNS3, NOTCH1, EIF2AK1, CDKN1B, CNTF, CD80, HIPK1, PHB2, NOTCH4, VEGFA, TGFBR3, PBX1, CHRNB2, IL12B, MDM4, RBPJ, TBX18, MED1	935	538	13588	1.26958	1	0.674711	74.0214
GOTERM_BP_FAT	GO:0043009~chordate embryonic development	38	2.43746	0.0730963	GNA13, ZFAND5, 2610005L07RIK, BBS4, ENAH, PITPNB, PAX6, PAX3, DLK1, TCF7L2, MAP3K7, N4BP2L2, CHD8, SIN3A, ECE1, INPP5K, COL4A3BP, ANKRD11, MKL2, TRAF6, AMD1, ALX1, SETDB1, EGFR, HTT, SIX2, MBNL1, ITGA4, UBE2B, NOTCH1, HOXB2, TGFBR3, MAPK8IP3, PBX1, GNAS, TBX18, ADD1, MED1	935	421	13588	1.31173	1	0.673727	74.1178
GOTERM_BP_FAT	GO:0007242~intracellular signaling cascade	75	4.81078	0.0740621	GNA13, ADCY5, TLR4, RPS6KB1, MAP3K7, MLL5, TIAM2, SPRED2, PIK3CA, RAPGEF5, B230208H17RIK, RALA, RAB6B, TLK1, SPRED1, PRKACB, PLCB1, MLL3, LTB, PRKCA, RAP2B, SRPK2, BRCC3, RAB39B, MADD, RALBP1, RXRA, RINT1, PIK3CD, SOCS6, PPARGC1B, STK3, TNS3, GNAL, SS18, XPA, DNAJC27, ARHGAP32, CCND1, DOK3, HIPK1, RAB14, PPM1L, GNAS, UNC13C, TSHR, ASB7, USP8, UBE3A, STK17B, AKAP13, CHEK1, DGKD, SAFB, RHOBTB1, DCL…	935	915	13588	1.1912	1	0.676729	74.5938
GOTERM_BP_FAT	GO:0048534~hemopoietic or lymphoid organ development	27	1.73188	0.0746775	FGF10, SOX4, CACNB4, ZBTB16, IL7R, VPS33A, MLL5, ACIN1, TRAF6, LTB, PIK3R1, SPN, MYST3, APC, THEMIS, ZFP826, LILRB3, VEGFA, TGFBR3, PBX1, IL12B, RBPJ, TSHR, NCOR1, ADD2, MED1, ADD1	935	281	13588	1.39637	1	0.677902	74.8928
GOTERM_BP_FAT	GO:0065004~protein-DNA complex assembly	10	0.641437	0.0758095	H1F0, HIST1H1T, CENPA, HJURP, HIST2H2BE, HIST1H3B, HIST3H2A, MIS12, HIST1H3H, MYST3	935	76	13588	1.91219	1	0.681653	75.4342
GOTERM_BP_FAT	GO:0043254~regulation of protein complex assembly	9	0.577293	0.0761738	CDKN1B, SPNB2, TMOD3, RDX, MAPRE1, RICTOR, RASA1, CLEC2I, APC	935	65	13588	2.01221	1	0.681527	75.6061
GOTERM_BP_FAT	GO:0045934~negative regulation of nucleobase, nucleoside, nucleotide and nucleic acid metabolic process	36	2.30917	0.076816	BCLAF1, ZBTB16, PAX3, PDX1, SOX9, ZC3H8, CBX5, MSX3, SIN3A, BCOR, BAZ2A, TCF25, HNRNPAB, ALX1, MYST3, TBL1XR1, ZBTB7A, DNMT3A, NACC1, KLF12, IRF2BP2, MBD2, UBE2B, PA2G4, TIMELESS, BPTF, HIPK1, TRPS1, NAB2, BCL6B, ZFP281, MDM4, LRCH4, RBPJ, CUX1, NCOR1	935	397	13588	1.31782	1	0.682778	75.9063
GOTERM_BP_FAT	GO:0006304~DNA modification	5	0.320718	0.0785975	DNMT3A, MLL5, PIWIL2, BAZ2A, KCNQ1OT1	935	24	13588	3.02763	1	0.689544	76.7209
GOTERM_BP_FAT	GO:0060770~negative regulation of epithelial cell proliferation involved in prostate gland development	3	0.192431	0.0786618	CDKN1B, STK11, APC	935	7	13588	6.22827	1	0.687946	76.7498
GOTERM_BP_FAT	GO:0008209~androgen metabolic process	3	0.192431	0.0786618	ESR1, SRD5A1, CYP19A1	935	7	13588	6.22827	1	0.687946	76.7498
GOTERM_BP_FAT	GO:0047496~vesicle transport along microtubule	3	0.192431	0.0786618	KIF5B, HTT, PAFAH1B1	935	7	13588	6.22827	1	0.687946	76.7498
GOTERM_BP_FAT	GO:0006656~phosphatidylcholine biosynthetic process	3	0.192431	0.0786618	CHKA, FABP3, PCYT1A	935	7	13588	6.22827	1	0.687946	76.7498
GOTERM_BP_FAT	GO:0030858~positive regulation of epithelial cell differentiation	3	0.192431	0.0786618	NOTCH1, PAX6, APC	935	7	13588	6.22827	1	0.687946	76.7498
GOTERM_BP_FAT	GO:0010812~negative regulation of cell-substrate adhesion	3	0.192431	0.0786618	PTEN, PIK3R1, RASA1	935	7	13588	6.22827	1	0.687946	76.7498
GOTERM_BP_FAT	GO:0000226~microtubule cytoskeleton organization	13	0.833868	0.0787902	HAUS4, BBS4, CKAP5, CEP63, UBE2B, TTLL3, HOOK3, SS18, MTAP1B, TEKT3, PAFAH1B1, MTAP7, DST	935	111	13588	1.70202	1	0.686666	76.8074
GOTERM_BP_FAT	GO:0060562~epithelial tube morphogenesis	13	0.833868	0.0787902	BBS4, ENAH, ESR1, FGF10, PAX3, MAP3K7, TIMELESS, PHB2, PBX1, TRAF6, ETV4, MED1, ALX1	935	111	13588	1.70202	1	0.686666	76.8074
GOTERM_BP_FAT	GO:0060749~mammary gland alveolus development	4	0.256575	0.0792554	CCND1, PHB2, VEGFA, ESR1	935	15	13588	3.87537	1	0.687008	77.0151
GOTERM_BP_FAT	GO:0000245~spliceosome assembly	4	0.256575	0.0792554	SRPK2, TDRD3, RBM5, MBNL1	935	15	13588	3.87537	1	0.687008	77.0151
GOTERM_BP_FAT	GO:0032479~regulation of type I interferon production	4	0.256575	0.0792554	POLR3F, TLR3, TLR4, HSPD1	935	15	13588	3.87537	1	0.687008	77.0151
GOTERM_BP_FAT	GO:0000059~protein import into nucleus, docking	4	0.256575	0.0792554	IPO8, XPO7, KPNB1, TNPO1	935	15	13588	3.87537	1	0.687008	77.0151
GOTERM_BP_FAT	GO:0045892~negative regulation of transcription, DNA-dependent	29	1.86017	0.0799674	PDX1, PAX3, ZBTB16, SOX9, CBX5, MSX3, SIN3A, BCOR, BAZ2A, TCF25, HNRNPAB, ALX1, ZBTB7A, DNMT3A, TBL1XR1, KLF12, IRF2BP2, MBD2, UBE2B, PA2G4, TIMELESS, BPTF, HIPK1, TRPS1, BCL6B, MDM4, RBPJ, CUX1, NCOR1	935	308	13588	1.36833	1	0.688519	77.3295
GOTERM_BP_FAT	GO:0009792~embryonic development ending in birth or egg hatching	38	2.43746	0.0807882	GNA13, ZFAND5, 2610005L07RIK, BBS4, ENAH, PITPNB, PAX6, PAX3, DLK1, TCF7L2, MAP3K7, N4BP2L2, CHD8, SIN3A, ECE1, INPP5K, COL4A3BP, ANKRD11, MKL2, TRAF6, AMD1, ALX1, SETDB1, EGFR, HTT, SIX2, MBNL1, ITGA4, UBE2B, NOTCH1, HOXB2, TGFBR3, MAPK8IP3, PBX1, GNAS, TBX18, ADD1, MED1	935	425	13588	1.29939	1	0.69052	77.687
GOTERM_BP_FAT	GO:0006417~regulation of translation	12	0.769724	0.0815622	EIF4G1, PA2G4, EIF2AK1, TRMT6, EIF2S1, TIA1, SEPSECS, PIWIL2, PUM2, ANKHD1, EIF2C3, EIF4E2	935	100	13588	1.74391	1	0.692274	78.0192
GOTERM_BP_FAT	GO:0050657~nucleic acid transport	9	0.577293	0.081736	NUP133, NUP214, MYO1C, CKAP5, NUP210, NUP93, GLE1, RANBP2, XPO7	935	66	13588	1.98172	1	0.691234	78.0931
GOTERM_BP_FAT	GO:0051236~establishment of RNA localization	9	0.577293	0.081736	NUP133, NUP214, MYO1C, CKAP5, NUP210, NUP93, GLE1, RANBP2, XPO7	935	66	13588	1.98172	1	0.691234	78.0931
GOTERM_BP_FAT	GO:0050658~RNA transport	9	0.577293	0.081736	NUP133, NUP214, MYO1C, CKAP5, NUP210, NUP93, GLE1, RANBP2, XPO7	935	66	13588	1.98172	1	0.691234	78.0931
GOTERM_BP_FAT	GO:0046777~protein amino acid autophosphorylation	9	0.577293	0.081736	EGFR, EIF2AK1, CSNK2A1, EIF2S1, MET, CDK12, CAD, STK4, INSRR	935	66	13588	1.98172	1	0.691234	78.0931
GOTERM_BP_FAT	GO:0008610~lipid biosynthetic process	27	1.73188	0.0848893	CHKA, SC5D, STAR, ALOX12E, GNE, PDSS2, SC4MOL, ACBD3, ST6GALNAC4, LPCAT1, GGPS1, PCYT1A, SRD5A1, PCYT1B, PRKAA2, HSD17B7, DHCR24, MOGAT2, SCD2, LPGAT1, CYP11A1, UGCG, DGAT1, P2RX1, FABP3, PBX1, MECR	935	285	13588	1.37677	1	0.703707	79.3947
GOTERM_BP_FAT	GO:0051253~negative regulation of RNA metabolic process	29	1.86017	0.0849507	PDX1, PAX3, ZBTB16, SOX9, CBX5, MSX3, SIN3A, BCOR, BAZ2A, TCF25, HNRNPAB, ALX1, ZBTB7A, DNMT3A, TBL1XR1, KLF12, IRF2BP2, MBD2, UBE2B, PA2G4, TIMELESS, BPTF, HIPK1, TRPS1, BCL6B, MDM4, RBPJ, CUX1, NCOR1	935	310	13588	1.3595	1	0.702163	79.4193
GOTERM_BP_FAT	GO:0007049~cell cycle	52	3.33547	0.0850497	AURKB, CDC16, MLL5, SIN3A, PMS2, MTAP9, PIWIL2, TLK1, ZW10, RBBP4, CRYAA, CCNH, CEP110, RINT1, HMGA2, UBE2B, NCAPD3, JMY, CCND1, PPM1D, RIF1, TIMELESS, BUB1B, PSME3, ANAPC7, MAPRE1, MDM4, DST, HAUS4, PARD3, PPP2R3A, STK11, NEK1, CHEK1, ZFP318, SESN3, HJURP, TRP53INP1, PAFAH1B1, CLASP1, CLASP2, APC, CKAP5, CEP63, 9130404D08RIK, MIS12, CDKN1B, RPS6KA2, DMTF1, SETD8, SMC1A, CALM1	935	611	13588	1.23682	1	0.700793	79.4589
GOTERM_BP_FAT	GO:0051172~negative regulation of nitrogen compound metabolic process	36	2.30917	0.0855932	BCLAF1, ZBTB16, PAX3, PDX1, SOX9, ZC3H8, CBX5, MSX3, SIN3A, BCOR, BAZ2A, TCF25, HNRNPAB, ALX1, MYST3, TBL1XR1, ZBTB7A, DNMT3A, NACC1, KLF12, IRF2BP2, MBD2, UBE2B, PA2G4, TIMELESS, BPTF, HIPK1, TRPS1, NAB2, BCL6B, ZFP281, MDM4, LRCH4, RBPJ, CUX1, NCOR1	935	401	13588	1.30467	1	0.701398	79.6751
GOTERM_BP_FAT	GO:0016331~morphogenesis of embryonic epithelium	10	0.641437	0.0861657	MAP3K7, BBS4, ENAH, HTT, FGF10, PAX3, PDX1, TRAF6, TBX18, ALX1	935	78	13588	1.86316	1	0.702124	79.9005
GOTERM_BP_FAT	GO:0051248~negative regulation of protein metabolic process	10	0.641437	0.0861657	PRKCA, MSX3, EIF2AK1, INPP5K, TIA1, FKBP1A, ANKHD1, MDM4, UBE2B, EIF2C3	935	78	13588	1.86316	1	0.702124	79.9005
GOTERM_BP_FAT	GO:0048610~reproductive cellular process	18	1.15459	0.0865124	DNMT3A, BBS4, UBE3A, RXRA, PDE3A, RPS6KB1, ZBTB16, SOX9, UBE2B, NR2C2, TAF7L, HIST1H1T, NOTCH1, RPS6KA2, PIWIL2, PAFAH1B1, MTAP7, FANCC	935	173	13588	1.51206	1	0.701859	80.0359
GOTERM_BP_FAT	GO:0006403~RNA localization	9	0.577293	0.087532	NUP133, NUP214, MYO1C, CKAP5, NUP210, NUP93, GLE1, RANBP2, XPO7	935	67	13588	1.95214	1	0.70451	80.429
GOTERM_BP_FAT	GO:0001763~morphogenesis of a branching structure	14	0.898012	0.0880009	GNA13, DICER1, ESR1, FGF10, IGF1, SOX9, NOTCH1, TIMELESS, PHB2, VEGFA, NOTCH4, PBX1, ETV4, MED1	935	125	13588	1.62765	1	0.704763	80.6072
GOTERM_BP_FAT	GO:0007162~negative regulation of cell adhesion	5	0.320718	0.0887152	CBLL1, PTEN, PIK3R1, RASA1, SPN	935	25	13588	2.90652	1	0.706061	80.876
GOTERM_BP_FAT	GO:0006338~chromatin remodeling	6	0.384862	0.0890834	CHD8, RBBP4, BAZ1B, BPTF, HJURP, INO80	935	35	13588	2.49131	1	0.705881	81.0131
GOTERM_BP_FAT	GO:0006470~protein amino acid dephosphorylation	13	0.833868	0.0919098	NCEH1, PPP2R3A, PTPRA, STYX, DUSP12, PTPDC1, PTEN, PTPN11, EYA3, PPM1D, DUSP3, PPP1R12A, PPM1L	935	114	13588	1.65723	1	0.715906	82.0352
GOTERM_BP_FAT	GO:0060560~developmental growth involved in morphogenesis	4	0.256575	0.0927596	ESR1, FGF10, SOX9, MED1	935	16	13588	3.63316	1	0.717645	82.3322
GOTERM_BP_FAT	GO:0007050~cell cycle arrest	8	0.513149	0.0943938	MLL5, CDKN1B, STK11, TRP53INP1, DST, APC, SESN3, JMY	935	57	13588	2.03967	1	0.722484	82.8904
GOTERM_BP_FAT	GO:0007267~cell-cell signaling	27	1.73188	0.0992399	SYT1, FGF10, ILDR2, CACNB4, GAD2, PCDHB16, SYN2, PAFAH1B1, KLK8, DLGAP2, NRXN3, HTT, MET, STXBP1, NRXN1, RPH3A, LIN7A, WNT2B, ACVR2B, DGAT1, KIF1B, P2RX1, GLS, TMOD2, CHRNB2, VAMP2, UNC13C	935	290	13588	1.35304	1	0.739419	84.4494
GOTERM_BP_FAT	GO:0050673~epithelial cell proliferation	5	0.320718	0.0994243	CCND1, ESR1, FGF10, SOX9, MED1	935	26	13588	2.79473	1	0.738448	84.506
GOTERM_BP_FAT	GO:0042461~photoreceptor cell development	5	0.320718	0.0994243	BBS4, MIAT, VEGFA, PAX6, RORB	935	26	13588	2.79473	1	0.738448	84.506
GOTERM_BP_FAT	GO:0060603~mammary gland duct morphogenesis	5	0.320718	0.0994243	PHB2, ESR1, FGF10, ETV4, MED1	935	26	13588	2.79473	1	0.738448	84.506
GOTERM_CC_FAT	GO:0043232~intracellular non-membrane-bounded organelle	186	11.9307	1.41283e-11	MTSS1, ENAH, PRPF4B, PNMA2, VAPA, XRCC6, RBM4, HIRA, STOML2, RPS6KB1, AURKB, CDC16, CEP70, AI314180, CBX5, HOOK3, TAF7L, KIF13A, ESF1, TOP1, SIN3A, ANK2, ACIN1, MRPL35, KIF13B, MYST3, H1F0, MRPL52, NUP133, MRPL51, TWF1, RRP1, KIF5B, FAM82A1, ENC1, KIF5C, MYH4, RPH3A, DCTN4, NCAPD3, KRTAP26-1, PA2G4, RFC1, BAZ1B, MTAP1B, CLIP1, RPS10, PDE4DIP, RNF20, DST, ADD2, XRN2, SUV420H1, ADD1, BBS4, SDAD1, M…	760	1919	12504	1.59468	6.48492e-09	6.48492e-09	2.01006e-08
GOTERM_CC_FAT	GO:0043228~non-membrane-bounded organelle	186	11.9307	1.41283e-11	MTSS1, ENAH, PRPF4B, PNMA2, VAPA, XRCC6, RBM4, HIRA, STOML2, RPS6KB1, AURKB, CDC16, CEP70, AI314180, CBX5, HOOK3, TAF7L, KIF13A, ESF1, TOP1, SIN3A, ANK2, ACIN1, MRPL35, KIF13B, MYST3, H1F0, MRPL52, NUP133, MRPL51, TWF1, RRP1, KIF5B, FAM82A1, ENC1, KIF5C, MYH4, RPH3A, DCTN4, NCAPD3, KRTAP26-1, PA2G4, RFC1, BAZ1B, MTAP1B, CLIP1, RPS10, PDE4DIP, RNF20, DST, ADD2, XRN2, SUV420H1, ADD1, BBS4, SDAD1, M…	760	1919	12504	1.59468	6.48492e-09	6.48492e-09	2.01006e-08
GOTERM_CC_FAT	GO:0005694~chromosome	59	3.78448	4.38556e-11	KIF22, PRPF4B, ARID4A, ARID4B, XRCC6, HIRA, AURKB, TAF7L, CBX5, TOP1, SIN3A, HIST3H2A, ZW10, MYST3, H1F0, NUP133, SP100, MBD2, HMGA2, UBE2B, NCAPD3, HIST1H1T, BAZ1B, RFC1, RIF1, HIST2H2BE, BUB1B, RNF20, SUV420H1, HMGB4, CHEK1, CHD8, HJURP, CENPA, PBRM1, CLASP1, RNF168, CLASP2, CHD6, BAZ2A, CHD4, APC, CENPO, SETDB1, DNMT3A, CENPL, SMG6, CREBBP, CENPP, 9130404D08RIK, MIS12, ATRX, SMARCC1, HIST1H3B,…	760	378	12504	2.568	2.01297e-08	1.00649e-08	6.23938e-08
GOTERM_CC_FAT	GO:0031981~nuclear lumen	101	6.47851	4.88771e-10	PNMA2, RBM4, INTS3, SART3, MED20, PNN, TAF7L, CBX5, ESF1, INTS8, TOP1, MLL5, SIN3A, SRRM2, SRRM1, ACIN1, MLL3, TGS1, LUC7L3, MYST3, IKBKAP, RRP1, SRP54A, SRP54B, SRP54C, MED13, MED19, PA2G4, KDM2A, MGA, LRCH4, XRN2, SDAD1, ELK1, CHEK1, MED12L, SFRS18, TCP11, DDX46, EIF3L, NAT10, PRPF40A, TAF2, DNMT3A, MYO1C, SMG6, MAML2, CREBBP, CTR9, ATF4, PAXIP1, PPIG, NOLC1, TDG, UTP14A, RBPJ, GM347, COPS5, PA…	760	883	12504	1.8819	2.24346e-07	7.47819e-08	6.95379e-07
GOTERM_CC_FAT	GO:0044427~chromosomal part	49	3.14304	3.82368e-09	KIF22, ARID4A, ARID4B, HIRA, AURKB, TAF7L, CBX5, SIN3A, HIST3H2A, ZW10, MYST3, H1F0, NUP133, MBD2, HMGA2, UBE2B, NCAPD3, HIST1H1T, RIF1, RFC1, BAZ1B, HIST2H2BE, BUB1B, SUV420H1, CHEK1, CHD8, HJURP, CENPA, PBRM1, CLASP1, CLASP2, CHD6, BAZ2A, CHD4, APC, CENPO, DNMT3A, CENPL, SMG6, CREBBP, CENPP, 9130404D08RIK, MIS12, ATRX, SMARCC1, HIST1H3B, TMPO, SMC1A, HIST1H3H	760	318	12504	2.53515	1.75507e-06	4.38768e-07	5.43999e-06
GOTERM_CC_FAT	GO:0070013~intracellular organelle lumen	115	7.37652	2.82821e-08	GRPEL2, PNMA2, RBM4, INTS3, SART3, MED20, PNN, TAF7L, CBX5, ESF1, INTS8, TOP1, MLL5, SIN3A, SRRM2, SRRM1, ACIN1, TGS1, MLL3, LUC7L3, MYST3, MRPL52, IKBKAP, MRPL51, RRP1, SRP54A, SRP54B, SRP54C, MED13, MED19, PA2G4, KDM2A, MGA, LRCH4, XRN2, SDAD1, ELK1, CHEK1, MED12L, SFRS18, TCP11, DDX46, EIF3L, NAT10, SUPV3L1, HSPE1, PRPF40A, TAF2, DNMT3A, MYO1C, SMG6, MAML2, CREBBP, CTR9, ATF4, PAXIP1, PPIG, NO…	760	1133	12504	1.66995	1.29814e-05	2.59629e-06	4.02372e-05
GOTERM_CC_FAT	GO:0031974~membrane-enclosed lumen	118	7.56895	3.07561e-08	GRPEL2, PNMA2, STAR, RBM4, INTS3, SART3, MED20, PNN, TAF7L, CBX5, ESF1, INTS8, TOP1, MLL5, SIN3A, SRRM2, SRRM1, ACIN1, TGS1, MLL3, LUC7L3, MYST3, MRPL52, IKBKAP, MRPL51, RRP1, SRP54A, SRP54B, SRP54C, MED13, MED19, PA2G4, KDM2A, MGA, LRCH4, XRN2, SDAD1, ELK1, CHEK1, MED12L, SFRS18, TCP11, DDX46, BCHE, EIF3L, HSPE1, NAT10, SUPV3L1, PRPF40A, TAF2, DNMT3A, MYO1C, SMG6, MAML2, CREBBP, DNHD1, CTR9, ATF…	760	1174	12504	1.65367	1.41169e-05	2.35284e-06	4.3757e-05
GOTERM_CC_FAT	GO:0043233~organelle lumen	115	7.37652	3.231e-08	GRPEL2, PNMA2, RBM4, INTS3, SART3, MED20, PNN, TAF7L, CBX5, ESF1, INTS8, TOP1, MLL5, SIN3A, SRRM2, SRRM1, ACIN1, TGS1, MLL3, LUC7L3, MYST3, MRPL52, IKBKAP, MRPL51, RRP1, SRP54A, SRP54B, SRP54C, MED13, MED19, PA2G4, KDM2A, MGA, LRCH4, XRN2, SDAD1, ELK1, CHEK1, MED12L, SFRS18, TCP11, DDX46, EIF3L, NAT10, SUPV3L1, HSPE1, PRPF40A, TAF2, DNMT3A, MYO1C, SMG6, MAML2, CREBBP, CTR9, ATF4, PAXIP1, PPIG, NO…	760	1136	12504	1.66554	1.48302e-05	2.11861e-06	4.59677e-05
GOTERM_CC_FAT	GO:0016604~nuclear body	28	1.79602	9.47287e-08	WBP11, ZBTB16, SART3, PNN, SFRS18, MLL5, DDX46, SRRM2, CDK12, SRRM1, WAC, TGS1, RBM25, LUC7L3, PRPF40A, NACC1, SP100, SRP54A, SRP54B, SRP54C, MAML2, CREBBP, CTR9, PPIG, HIPK1, NOLC1, RSRC1, TDG, LRCH4, PSME4	760	142	12504	3.24418	4.34795e-05	5.43504e-06	0.000134771
GOTERM_CC_FAT	GO:0016607~nuclear speck	21	1.34702	3.22841e-07	SRP54A, SRP54B, SRP54C, MAML2, WBP11, ZBTB16, SART3, PNN, CTR9, SFRS18, MLL5, PPIG, DDX46, HIPK1, RSRC1, SRRM2, CDK12, SRRM1, WAC, PSME4, RBM25, LUC7L3, PRPF40A	760	90	12504	3.83895	0.000148173	1.64648e-05	0.000459308
GOTERM_CC_FAT	GO:0005635~nuclear envelope	28	1.79602	4.59061e-07	NUP93, NUP214, BCHE, NUP210, PAFAH1B1, GLE1, RANBP2, TPR, TNPO1, KPNB1, CYHR1, WDFY3, NUP133, MYO1C, SNUPN, NAV3, IPO8, RNF43, SYNE1, GMCL1, PRICKLE1, BNIP2, TMPO, XPO7, KPNA2, UBXN4, KPNA1, RETSAT	760	153	12504	3.01094	0.000210687	2.10707e-05	0.000653108
GOTERM_CC_FAT	GO:0005654~nucleoplasm	68	4.36177	7.2647e-07	COPS5, PAX6, PAX3, INTS3, SART3, MED20, TAF7L, PNN, CBX5, ESF1, INTS8, TOP1, MLL5, GTF2A1, SRRM2, CDK12, SRRM1, TGS1, MLL3, LUC7L3, ALX1, MYST3, IKBKAP, SP100, RBBP4, CCNH, SRP54A, SRP54B, SRP54C, MED13, MBD2, MED19, CCND1, HIPK1, KDM2A, MGA, PSME4, LRCH4, CLOCK, MED1, ELK1, CHEK1, WBP11, ZBTB16, TCF7L2, MED12L, SFRS18, DDX46, WDR12, EIF3L, POU3F2, WAC, RBM25, PRPF40A, TAF2, NACC1, MYO1C, CREBBP,…	760	599	12504	1.86774	0.000333394	3.03131e-05	0.00103355
GOTERM_CC_FAT	GO:0046930~pore complex	17	1.09044	5.86137e-06	NUP133, MYO1C, SNUPN, NUP93, TOMM40, IPO8, NUP214, NUP210, TOMM40L, GLE1, RANBP2, TPR, XPO7, KPNB1, KPNA2, TNPO1, KPNA1	760	73	12504	3.83143	0.00268676	0.000224173	0.00833871
GOTERM_CC_FAT	GO:0044451~nucleoplasm part	58	3.72033	6.25868e-06	COPS5, PAX6, PAX3, INTS3, SART3, MED20, TAF7L, PNN, CBX5, INTS8, MLL5, GTF2A1, SRRM2, CDK12, SRRM1, TGS1, MLL3, LUC7L3, ALX1, MYST3, IKBKAP, RBBP4, SP100, SRP54A, CCNH, SRP54B, SRP54C, MED13, MBD2, MED19, HIPK1, MGA, PSME4, LRCH4, CLOCK, MED1, WBP11, ZBTB16, TCF7L2, MED12L, SFRS18, DDX46, POU3F2, WAC, RBM25, PRPF40A, TAF2, NACC1, CREBBP, MAML2, CTR9, ATF4, PAXIP1, PPIG, NOLC1, RSRC1, THRAP3, TDG,…	760	513	12504	1.86014	0.00286862	0.000220956	0.00890393
GOTERM_CC_FAT	GO:0005643~nuclear pore	15	0.962155	8.42012e-06	NUP133, MYO1C, SNUPN, NUP93, IPO8, NUP214, NUP210, GLE1, RANBP2, XPO7, TPR, KPNB1, KPNA2, TNPO1, KPNA1	760	59	12504	4.18287	0.00385739	0.000276023	0.0119787
GOTERM_CC_FAT	GO:0000775~chromosome, centromeric region	21	1.34702	1.01298e-05	CENPO, NUP133, DNMT3A, CENPL, CREBBP, CENPP, AURKB, MIS12, CBX5, SIN3A, BAZ1B, HJURP, CENPA, PBRM1, BUB1B, CLASP1, CLASP2, SMC1A, SUV420H1, APC, ZW10	760	111	12504	3.11266	0.00463881	0.000309926	0.0144108
GOTERM_CC_FAT	GO:0000785~chromatin	26	1.66774	1.99644e-05	KIF22, ARID4A, ARID4B, HIRA, CBX5, CHD8, CENPA, HIST3H2A, CHD6, BAZ2A, CHD4, MYST3, H1F0, DNMT3A, MBD2, HMGA2, 9130404D08RIK, UBE2B, ATRX, HIST1H1T, BAZ1B, HIST2H2BE, SMARCC1, HIST1H3B, TMPO, HIST1H3H	760	165	12504	2.59254	0.00912188	0.00057257	0.0283998
GOTERM_CC_FAT	GO:0005730~nucleolus	39	2.5016	2.69054e-05	SDAD1, PNMA2, YPEL2, RBM4, WBP11, CBX5, ESF1, RBM4B, TOP1, UTP11L, TCP11, SIN3A, RRP1B, HJURP, TRP53INP1, EIF3L, WDR12, NAT10, USP36, BRD4, ACIN1, KDM5A, DCAF17, BAZ2A, RRP1, MYO1C, POLR1E, SMG6, EXOSC4, ILF3, MBD2, PA2G4, NOLC1, UBTF, NOP58, MRO, UTP14A, GM347, XRN2	760	310	12504	2.06985	0.0122738	0.000726191	0.0382718
GOTERM_CC_FAT	GO:0015630~microtubule cytoskeleton	50	3.20718	4.74674e-05	KIF22, VAPA, AURKB, CDC16, TTLL1, TTLL3, HOOK3, AI314180, CEP70, KIF13A, DCAF12, ACTR1A, MTAP9, MTAP7, ZW10, KIF13B, FAM82A1, KIF5B, CEP110, KIF5C, DYNLT3, DCTN4, SS18, TTLL10, KIF1B, MTAP1B, CLIP1, PDE4DIP, MAPRE1, DST, HAUS4, BBS4, PARD3, TUBA3A, AKAP9, NPHP4, TEKT3, TUBE1, PAFAH1B1, ODF2, CLASP1, CLASP2, APPBP2, APC, DNM3, CKAP5, CEP63, RPS6KA2, MAPK14, CALM1	760	450	12504	1.82807	0.0215524	0.00120972	0.0675112
GOTERM_CC_FAT	GO:0005874~microtubule	32	2.0526	5.4342e-05	HAUS4, KIF22, VAPA, TUBA3A, CDC16, TTLL1, HOOK3, TTLL3, KIF13A, TEKT3, MTAP9, TUBE1, PAFAH1B1, ODF2, CLASP1, MTAP7, APPBP2, CLASP2, APC, ZW10, KIF13B, DNM3, KIF5B, FAM82A1, KIF5C, DYNLT3, SS18, TTLL10, KIF1B, MTAP1B, CLIP1, MAPRE1	760	240	12504	2.19368	0.0246351	0.00131196	0.0772851
GOTERM_CC_FAT	GO:0000776~kinetochore	14	0.898012	7.12247e-05	NUP133, CREBBP, MIS12, CBX5, SIN3A, CENPA, HJURP, PBRM1, BUB1B, CLASP1, CLASP2, SMC1A, ZW10, APC	760	62	12504	3.71511	0.0321647	0.00163333	0.101284
GOTERM_CC_FAT	GO:0012505~endomembrane system	55	3.5279	0.000150059	SYT1, COPA, CLTB, WHAMM, ST6GALNAC4, RC3H2, GLE1, RANBP2, TPR, CYHR1, KPNB1, NUP133, SNUPN, IPO8, NAV3, ARHGAP32, KIF1B, BNIP2, RYR1, RAB14, VAMP2, CUX1, KPNA2, KPNA1, EPN2, PARD3, SLC35A5, NUP93, FKBP1A, FMO4, NUP214, GAD2, MIA3, BCHE, NUP210, STX17, SYN2, PAFAH1B1, PCYT1A, APPBP2, TNPO1, WDFY3, ASPSCR1, RAB2B, ACER3, MYO1C, RNF43, SYNE1, GMCL1, PRICKLE1, MAPK8IP3, TMPO, XPO7, UBXN4, RETSAT	760	535	12504	1.69139	0.0665633	0.00327473	0.213278
GOTERM_CC_FAT	GO:0005881~cytoplasmic microtubule	6	0.384862	0.00102723	SS18, CLIP1, CLASP1, MAPRE1, CLASP2, APC	760	14	12504	7.05113	0.376085	0.0212145	1.45156
GOTERM_CC_FAT	GO:0019898~extrinsic to membrane	46	2.95061	0.00170458	SNAP29, GNA13, NAPG, CHMP5, STOML2, RDX, NELF, DAPP1, VPS35, YRDC, PCYT1A, SPRED1, APPBP2, ZW10, CYP19A1, PRKCA, FAM125B, ASPSCR1, STAMBP, CNKSR2, WDFY3, MAGI2, RALBP1, BECN1, DLGAP2, RINT1, DNHD1, PDE3A, CYP1A2, LIN7A, DOCK4, PLEKHA4, EPB4.1L2, GNAL, COG5, SCFD1, GAPVD1, VEGFA, RGS6, SH3KBP1, JAK1, GNAS, UNC13C, ANKFY1, UBXN4, RETSAT	760	472	12504	1.60343	0.543	0.0334735	2.39798
GOTERM_CC_FAT	GO:0031975~envelope	51	3.27133	0.00202357	GRPEL2, STAR, STOML2, COX5A, FAHD1, RANBP2, GLE1, TPR, CYHR1, KPNB1, NUP133, CYP11A1, AIFM2, SNUPN, NAV3, IPO8, HERC2, MCART1, BNIP2, KPNA2, KPNA1, SRGAP2, NDUFB3, NUP93, SFXN2, NUP214, MTCH2, BCHE, NUP210, PAFAH1B1, TNPO1, WDFY3, MYO1C, TOMM40, DNHD1, ABCB7, RNF43, SYNE1, ADAP2, GMCL1, P2RX1, UCP3, PRICKLE1, PHB2, TOMM40L, RHOT1, HSPD1, TMPO, XPO7, UBXN4, RETSAT	760	542	12504	1.54813	0.605352	0.0379992	2.84074
GOTERM_CC_FAT	GO:0005819~spindle	16	1.0263	0.00237451	HAUS4, KIF22, PARD3, FAM82A1, AURKB, CDC16, CEP63, RPS6KA2, MAPK14, MTAP9, CLASP1, PAFAH1B1, MAPRE1, CLASP2, CALM1, ZW10	760	109	12504	2.41507	0.664185	0.0427089	3.32569
GOTERM_CC_FAT	GO:0031967~organelle envelope	50	3.20718	0.0030506	GRPEL2, STAR, STOML2, COX5A, FAHD1, RANBP2, GLE1, TPR, CYHR1, KPNB1, NUP133, CYP11A1, AIFM2, SNUPN, IPO8, NAV3, HERC2, MCART1, BNIP2, KPNA2, KPNA1, SRGAP2, NDUFB3, NUP93, SFXN2, NUP214, MTCH2, BCHE, NUP210, PAFAH1B1, TNPO1, WDFY3, MYO1C, TOMM40, DNHD1, ABCB7, RNF43, SYNE1, ADAP2, GMCL1, UCP3, PRICKLE1, PHB2, TOMM40L, RHOT1, TMPO, HSPD1, XPO7, UBXN4, RETSAT	760	540	12504	1.52339	0.753985	0.0525083	4.25363
GOTERM_CC_FAT	GO:0005813~centrosome	20	1.28287	0.00380827	HAUS4, BBS4, CEP110, AKAP9, CDC16, CEP63, DCTN4, CEP70, AI314180, NPHP4, DCAF12, ACTR1A, TUBE1, PAFAH1B1, CLASP1, PDE4DIP, ODF2, MAPRE1, CLASP2, APC	760	160	12504	2.05658	0.826458	0.0628053	5.2837
GOTERM_CC_FAT	GO:0030684~preribosome	5	0.320718	0.0061935	UTP11L, RRP1, RRP1B, WDR12, UTP14A	760	13	12504	6.32794	0.942251	0.0968303	8.45958
GOTERM_CC_FAT	GO:0044430~cytoskeletal part	65	4.16934	0.00654937	KIF22, ENAH, VAPA, FERMT3, CDC16, AURKB, TTLL1, CEP70, TTLL3, HOOK3, AI314180, KIF13A, DCAF12, ACTR1A, MTAP9, MTAP7, ZW10, KIF13B, KIF5B, FAM82A1, CEP110, KIF5C, DYNLT3, MYH4, FLNB, DCTN4, KRTAP26-1, SS18, ANKRD26, ARHGAP32, KIF1B, TTLL10, MTAP1B, CLIP1, PDE4DIP, MAPRE1, HAUS4, BBS4, PARD3, TUBA3A, SYNC, FHL3, AKAP9, NPHP4, KRTAP31-1, SPNB2, TEKT3, TUBE1, CLASP1, ODF2, PAFAH1B1, CLASP2, APPBP2, A…	760	774	12504	1.38168	0.951006	0.0987762	8.92484
GOTERM_CC_FAT	GO:0000779~condensed chromosome, centromeric region	10	0.641437	0.00972566	NUP133, CENPA, HJURP, CREBBP, BUB1B, CLASP1, CLASP2, MIS12, SUV420H1, ZW10	760	60	12504	2.74211	0.988734	0.138888	12.9811
GOTERM_CC_FAT	GO:0005856~cytoskeleton	88	5.64464	0.00983726	MTSS1, KIF22, ENAH, VAPA, FERMT3, STOML2, CDC16, AURKB, TTLL1, CEP70, AI314180, TTLL3, HOOK3, KIF13A, DCAF12, ANK2, ACTR1A, MTAP9, MTAP7, KIF13B, ZW10, TWF1, KIF5B, FAM82A1, CEP110, ENC1, KIF5C, DYNLT3, MYH4, GAN, RPH3A, FLNB, DCTN4, KRTAP26-1, SS18, ANKRD26, ARHGAP32, KIF1B, TTLL10, RIF1, MTAP1B, SH3KBP1, CLIP1, PDE4DIP, MAPRE1, DST, ADD2, ADD1, HAUS4, BBS4, PARD3, SYNC, TUBA3A, FHL3, STK17B, CH…	760	1122	12504	1.2904	0.989302	0.136167	13.1205
GOTERM_CC_FAT	GO:0032420~stereocilium	5	0.320718	0.0107311	MYO1C, MYO15, RDX, PCDH15, DOCK4	760	15	12504	5.48421	0.992932	0.143376	14.2297
GOTERM_CC_FAT	GO:0005815~microtubule organizing center	21	1.34702	0.0108353	HAUS4, BBS4, CEP110, TUBA3A, AKAP9, CDC16, CEP63, DCTN4, CEP70, AI314180, NPHP4, DCAF12, ACTR1A, TUBE1, PAFAH1B1, CLASP1, PDE4DIP, ODF2, MAPRE1, CLASP2, APC	760	189	12504	1.82807	0.993266	0.14061	14.3582
GOTERM_CC_FAT	GO:0000777~condensed chromosome kinetochore	9	0.577293	0.0138991	NUP133, CENPA, HJURP, CREBBP, BUB1B, CLASP1, CLASP2, MIS12, ZW10	760	53	12504	2.79384	0.998379	0.172176	18.0558
GOTERM_CC_FAT	GO:0030529~ribonucleoprotein complex	41	2.62989	0.0148362	PRPF4B, MRPS15, DICER1, RBM5, RPL35, RPS6KB1, NUFIP2, PNN, UTP11L, RRP1B, RPL7, SRRM2, PIWIL2, SRRM1, WDR12, WAC, GTF3C1, HNRNPAB, MRPL35, GEMIN5, MRPL52, MRPL51, RRP1, SRP54A, SRP54B, SRP54C, MRPL9, MRPS5, RPL27, DDX6, SLBP, PA2G4, AQR, NOLC1, RPS6KA2, NOP58, LSM11, CPSF6, RPS10, UTP14A, KPNA2, EIF2C3, PRPF38B	760	462	12504	1.46008	0.998952	0.178007	19.1567
GOTERM_CC_FAT	GO:0005829~cytosol	47	3.01475	0.0162069	STAR, CHMP5, UBE3A, SYNC, PPIP5K1, CAD, CCT3, ZBTB16, TCF7L2, WDYHV1, GAD2, DAPP1, INPP5K, PSMB1, RPL7, BAG3, COL4A3BP, PIK3CA, PCYT1A, PRKACB, TRAF6, PSMD7, PIK3R1, ASPSCR1, IRS2, HSP90AA1, AIFM2, SLC12A3, AIMP2, SNX27, PIK3CD, CYCS, CCND1, CCT5, PFDN1, COG5, CCT4, GAPVD1, CDKN1B, PRICKLE1, PSMD11, NEDD4, MTAP1B, RAB14, PSME4, MECR, FABP6	760	549	12504	1.40851	0.999447	0.188062	20.7424
GOTERM_CC_FAT	GO:0001518~voltage-gated sodium channel complex	4	0.256575	0.0193822	SCN1A, SCN2A1, SCN7A, SCN10A	760	10	12504	6.58105	0.999875	0.215575	24.3052
GOTERM_CC_FAT	GO:0032421~stereocilium bundle	5	0.320718	0.0208179	MYO1C, MYO15, RDX, PCDH15, DOCK4	760	18	12504	4.57018	0.999936	0.224395	25.8667
GOTERM_CC_FAT	GO:0000502~proteasome complex	9	0.577293	0.0230894	RAD23B, PSMB1, PSMD11, UBE3A, PSME3, PSME4, PSMD6, PSMD7, AI314180	760	58	12504	2.55299	0.999978	0.240376	28.2762
GOTERM_CC_FAT	GO:0016592~Srb-mediator complex	6	0.384862	0.0249418	MED19, THRAP3, MED13, MED20, MED12L, MED1	760	28	12504	3.52556	0.999991	0.251614	30.187
GOTERM_CC_FAT	GO:0016605~PML body	5	0.320718	0.0251345	SP100, HIPK1, CREBBP, TDG, LRCH4	760	19	12504	4.32964	0.999992	0.247971	30.383
GOTERM_CC_FAT	GO:0030424~axon	13	0.833868	0.0286207	DCC, SCN1A, CDK5R1, HTT, SCN2A1, ESR1, NRCAM, GAD2, SLC1A2, ANK3, MAPK8IP3, KLHL24, APC	760	107	12504	1.99892	0.999998	0.271922	33.8424
GOTERM_CC_FAT	GO:0000793~condensed chromosome	13	0.833868	0.0286207	NUP133, CREBBP, MIS12, NCAPD3, HIST1H1T, BAZ1B, CENPA, HJURP, BUB1B, CLASP1, CLASP2, ZW10, SUV420H1	760	107	12504	1.99892	0.999998	0.271922	33.8424
GOTERM_CC_FAT	GO:0045202~synapse	29	1.86017	0.0312411	SNAP29, SYT1, ENAH, CDK5R1, SYNC, RPS6KB1, RIMS4, SLC32A1, NRCAM, GAD2, SLC1A2, ANK3, SYN2, DTNA, GABRG3, MAGI2, NRXN3, DLGAP2, NRXN1, RPH3A, SSPN, LIN7A, ARHGAP32, P2RX1, SH3KBP1, CHRNB2, VAMP2, UNC13C, CHRNE	760	319	12504	1.49569	1	0.287376	36.3367
GOTERM_CC_FAT	GO:0005852~eukaryotic translation initiation factor 3 complex	4	0.256575	0.032458	EIF3C, EIF3E, EIF3L, EIF3J	760	12	12504	5.48421	1	0.291222	37.465
GOTERM_CC_FAT	GO:0005942~phosphoinositide 3-kinase complex	4	0.256575	0.032458	DAPP1, PIK3CD, PIK3CA, PIK3R1	760	12	12504	5.48421	1	0.291222	37.465
GOTERM_CC_FAT	GO:0000792~heterochromatin	8	0.513149	0.0333145	ATRX, DNMT3A, BAZ1B, SMARCC1, MBD2, UBE2B, BAZ2A, CBX5	760	51	12504	2.5808	1	0.292202	38.248
GOTERM_CC_FAT	GO:0031988~membrane-bounded vesicle	36	2.30917	0.0351971	GNA13, HSP90AB1, SYT1, COPA, CLTB, LRBA, POMC, WHAMM, PCSK2, GAD2, CHIC1, ECE1, DGKD, SYN2, DNAJC5, SPERT, APPBP2, EGFR, ASPSCR1, HSP90AA1, BECN1, HTT, CHI3L3, RPH3A, KIF1B, CCT4, TFRC, RAB14, MAPK8IP3, VAMP2, HSPD1, ABL2, DST, GGNBP2, GH, EPN2	760	420	12504	1.41023	1	0.300602	39.9371
GOTERM_CC_FAT	GO:0044445~cytosolic part	9	0.577293	0.0358881	PFDN1, CCT5, CCT4, DAPP1, RPL7, PIK3CD, PIK3CA, CCT3, PIK3R1	760	63	12504	2.35038	1	0.300175	40.5462
GOTERM_CC_FAT	GO:0031252~cell leading edge	13	0.833868	0.0388796	ENAH, RDX, CYTH3, SLC1A2, INPP5K, TIAM2, ACAP2, PIK3CA, TMOD3, MAPK8IP3, GNAS, PAFAH1B1, RASA1	760	112	12504	1.90968	1	0.315596	43.1176
GOTERM_CC_FAT	GO:0034706~sodium channel complex	4	0.256575	0.0403373	SCN1A, SCN2A1, SCN7A, SCN10A	760	13	12504	5.06235	1	0.320016	44.3328
GOTERM_CC_FAT	GO:0015629~actin cytoskeleton	20	1.28287	0.0433099	MTSS1, TWF1, ENAH, MYO1C, FERMT3, FHL3, STK17B, MYH4, MYL12B, RPH3A, FLNB, PTPN11, EPB4.1L2, ANKRD26, ARHGAP32, SPNB2, MYO15, TMOD3, DST, ABL2	760	205	12504	1.60513	1	0.333991	46.7363
GOTERM_CC_FAT	GO:0016023~cytoplasmic membrane-bounded vesicle	35	2.24503	0.0447059	GNA13, HSP90AB1, SYT1, COPA, CLTB, LRBA, POMC, WHAMM, PCSK2, GAD2, CHIC1, ECE1, DGKD, SYN2, DNAJC5, SPERT, APPBP2, EGFR, HSP90AA1, BECN1, HTT, CHI3L3, RPH3A, KIF1B, CCT4, TFRC, RAB14, MAPK8IP3, VAMP2, HSPD1, ABL2, DST, GGNBP2, GH, EPN2	760	414	12504	1.39092	1	0.337427	47.8315
GOTERM_CC_FAT	GO:0000267~cell fraction	47	3.01475	0.0555428	PCDHA6, COPA, PCDHA7, PCDHA8, PCDHA9, VAPA, PCDHA2, PCDHA3, PCDHA4, PCDHA5, RPS6KB1, PCDHA1, ATP2B2, TIAM2, ANK3, SRD5A1, YRDC, MAGI2, SCN2A1, CYCS, WNK1, CYP1A2, NRXN1, DGAT1, RYR1, RAB14, SH3KBP1, GNAS, VAMP2, SNAP29, CDK5R1, SCN1A, FKBP1A, ITM2B, PCDHAC2, PCDHAC1, FMO4, ECE1, INPP5K, GGPS1, PCDHA10, PCDHA11, PCDHA12, TRAF6, DTNA, PLEC, ASPSCR1, NCEH1, HTT, MET, PDE3A, PTPN11, LIN7A, GCK, CYP4F…	760	596	12504	1.29744	1	0.396141	55.6477
GOTERM_CC_FAT	GO:0033267~axon part	5	0.320718	0.0616774	SCN1A, SLC1A2, ESR1, MAPK8IP3, APC	760	25	12504	3.29053	1	0.423818	59.5748
GOTERM_CC_FAT	GO:0034703~cation channel complex	11	0.705581	0.0619379	KCNS3, KCNS1, SCN1A, SCN2A1, KCTD20, KCTD12B, SCN7A, CACNB4, KCNQ2, KCNMB1, SCN10A	760	95	12504	1.90504	1	0.419278	59.7342
GOTERM_CC_FAT	GO:0005626~insoluble fraction	42	2.69403	0.0627256	PCDHA6, PCDHA7, COPA, PCDHA8, PCDHA9, VAPA, PCDHA2, PCDHA3, PCDHA4, PCDHA5, RPS6KB1, PCDHA1, ATP2B2, TIAM2, ANK3, YRDC, SRD5A1, MAGI2, SCN2A1, WNK1, CYP1A2, NRXN1, DGAT1, RYR1, RAB14, SH3KBP1, GNAS, VAMP2, SNAP29, SCN1A, CDK5R1, FKBP1A, ITM2B, PCDHAC2, PCDHAC1, FMO4, ECE1, INPP5K, PCDHA10, PCDHA11, PCDHA12, TRAF6, PLEC, DTNA, ASPSCR1, NCEH1, MET, PDE3A, PTPN11, LIN7A, CYP4F18, NEDD4, ABCC5	760	528	12504	1.30873	1	0.417608	60.2126
GOTERM_CC_FAT	GO:0005832~chaperonin-containing T-complex	3	0.192431	0.0630305	CCT5, CCT4, CCT3	760	7	12504	7.05113	1	0.413525	60.3964
GOTERM_CC_FAT	GO:0001726~ruffle	7	0.449006	0.0633429	INPP5K, ACAP2, TMOD3, GNAS, RDX, CYTH3, RASA1	760	47	12504	2.45039	1	0.409596	60.5838
GOTERM_CC_FAT	GO:0042383~sarcolemma	7	0.449006	0.0633429	SCN1A, SYNC, SCN2A1, RYR1, ESR1, SSPN, DTNA	760	47	12504	2.45039	1	0.409596	60.5838
GOTERM_CC_FAT	GO:0030665~clathrin coated vesicle membrane	6	0.384862	0.0645231	SYT1, GAD2, CLTB, SYN2, VAMP2, EPN2	760	36	12504	2.74211	1	0.410123	61.2846
GOTERM_CC_FAT	GO:0042995~cell projection	45	2.88647	0.0663314	DCC, SYT1, BBS4, CDK5R1, SCN1A, ENAH, TUBA3A, RDX, CYTH3, TTLL3, NRCAM, ATP2B2, NPHP4, GAD2, SLC1A2, TIAM2, INPP5K, ANK3, PIK3CA, PAFAH1B1, ODF2, KLHL24, RASA1, SPN, APC, KIF5B, MYO1C, HTT, TTC30A1, MET, KIF5C, SCN2A1, ESR1, PCDH15, RUFY3, DOCK4, ARHGAP32, TTLL10, MYO15, ACAP2, TMOD3, MAPK8IP3, GNAS, MAPRE1, AKAP4	760	575	12504	1.2876	1	0.413714	62.3357
GOTERM_CC_FAT	GO:0012506~vesicle membrane	11	0.705581	0.0693427	ASPSCR1, SYT1, COPA, GAD2, KIF1B, CLTB, SYN2, VAMP2, APPBP2, WHAMM, EPN2	760	97	12504	1.86576	1	0.422912	64.0276
GOTERM_CC_FAT	GO:0031982~vesicle	41	2.62989	0.0705469	GNA13, HSP90AB1, SYT1, COPA, CLTB, LRBA, POMC, WHAMM, SLC32A1, PCSK2, GAD2, CHIC1, ECE1, DGKD, SYN2, SPRED2, DNAJC5, RAB6B, SPERT, APPBP2, EGFR, ASPSCR1, HSP90AA1, BECN1, HTT, CHI3L3, RPH3A, KIF1B, CCT4, TFRC, SH3KBP1, RAB14, MAPK8IP3, VAMP2, HSPD1, ABL2, DST, GGNBP2, GH, EPN2, ATP8A1	760	519	12504	1.29973	1	0.423334	64.6842
GOTERM_CC_FAT	GO:0031410~cytoplasmic vesicle	40	2.56575	0.0779023	GNA13, HSP90AB1, SYT1, COPA, CLTB, LRBA, POMC, WHAMM, SLC32A1, PCSK2, GAD2, CHIC1, ECE1, DGKD, SYN2, SPRED2, DNAJC5, RAB6B, SPERT, APPBP2, EGFR, HSP90AA1, BECN1, HTT, CHI3L3, RPH3A, KIF1B, CCT4, TFRC, SH3KBP1, RAB14, MAPK8IP3, VAMP2, HSPD1, ABL2, DST, GGNBP2, GH, EPN2, ATP8A1	760	508	12504	1.29548	1	0.451425	68.4588
GOTERM_CC_FAT	GO:0030315~T-tubule	4	0.256575	0.0802282	SCN1A, SCN2A1, RYR1, ESR1	760	17	12504	3.87121	1	0.45627	69.5721
GOTERM_CC_FAT	GO:0000786~nucleosome	8	0.513149	0.0805588	H1F0, HIST1H1T, CENPA, HIST2H2BE, HIST1H3B, HIST3H2A, HIST1H3H, MYST3	760	62	12504	2.12292	1	0.452482	69.7273
GOTERM_CC_FAT	GO:0016585~chromatin remodeling complex	7	0.449006	0.0806916	RBBP4, BAZ1B, SMARCC1, MBD2, BAZ2A, MYSM1, CBX5	760	50	12504	2.30337	1	0.447948	69.7894
GOTERM_CC_FAT	GO:0000940~outer kinetochore of condensed chromosome	3	0.192431	0.0807378	NUP133, CREBBP, BUB1B	760	8	12504	6.16974	1	0.443151	69.811
GOTERM_CC_FAT	GO:0030659~cytoplasmic vesicle membrane	10	0.641437	0.0807586	SYT1, COPA, GAD2, KIF1B, CLTB, SYN2, VAMP2, APPBP2, WHAMM, EPN2	760	87	12504	1.89111	1	0.438351	69.8207
GOTERM_CC_FAT	GO:0005624~membrane fraction	40	2.56575	0.0809133	PCDHA6, PCDHA7, COPA, PCDHA8, PCDHA9, VAPA, PCDHA2, PCDHA3, PCDHA4, PCDHA5, RPS6KB1, PCDHA1, ATP2B2, TIAM2, ANK3, YRDC, SRD5A1, MAGI2, SCN2A1, WNK1, CYP1A2, NRXN1, DGAT1, RYR1, RAB14, SH3KBP1, GNAS, VAMP2, SNAP29, SCN1A, CDK5R1, FKBP1A, ITM2B, PCDHAC2, PCDHAC1, FMO4, ECE1, INPP5K, PCDHA10, PCDHA11, PCDHA12, TRAF6, DTNA, ASPSCR1, NCEH1, MET, PTPN11, LIN7A, CYP4F18, NEDD4, ABCC5	760	510	12504	1.2904	1	0.434209	69.8929
GOTERM_CC_FAT	GO:0030054~cell junction	37	2.37332	0.0894046	CLDN16, SNAP29, SYT1, PARD3, SCN1A, ENAH, RPS6KB1, RIMS4, PNN, GAD2, PVRL3, SYN2, DLG5, APC, DTNA, GABRG3, MAGI2, TMEM204, DLGAP2, SCN2A1, GJB3, RPH3A, SSPN, FLNB, LIN7A, PTPN11, TNS3, ARHGAP32, PRUNE, PKP3, SH3KBP1, DSC2, CHRNB2, VAMP2, UNC13C, CHRNE, DST	760	470	12504	1.29521	1	0.463678	73.6173
GOTERM_CC_FAT	GO:0044459~plasma membrane part	113	7.24824	0.0897075	GNA13, SYT1, ENAH, RPS6KB1, DLK1, VPS33A, PNN, ATP2B2, ACBD3, ANK2, SPRED2, RALA, ODZ1, SPN, EGFR, TMEM204, H2-L, MAGI2, SCN2A1, RPH3A, SSPN, TNS3, RYR1, RAB14, VAMP2, UNC13C, DST, ADD2, HS3ST3B1, ADD1, LOC676708, BBS4, CDK5R1, SCN1A, STAM2, ITGAE, CACNB4, KCNMB1, RIMS4, KCNS3, SLC32A1, GAD2, KCNS1, PVRL3, SPNB2, H2-Q2, ASPSCR1, MYO1C, TM2D1, MET, IGH-6, ITGA4, SLAMF1, LIN7A, PTPN11, NOTCH1, PKP3…	760	1633	12504	1.13849	1	0.460062	73.7419
GOTERM_CC_FAT	GO:0044463~cell projection part	16	1.0263	0.0928977	BBS4, CDK5R1, SCN1A, MYO1C, KIF5B, TUBA3A, KIF5C, ESR1, TTLL3, NPHP4, SLC1A2, ARHGAP32, TTLL10, MAPK8IP3, MAPRE1, APC	760	170	12504	1.54848	1	0.467577	75.0212
GOTERM_CC_FAT	GO:0005902~microvillus	5	0.320718	0.0959973	MYO1C, MYO15, RDX, PCDH15, DOCK4	760	29	12504	2.83666	1	0.474489	76.2085
GOTERM_MF_FAT	GO:0003677~DNA binding	188	12.059	4.25307e-10	MEF2A, XRCC6, BBX, INO80, RORB, PDX1, PNN, ZFP784, ZFP91, TOP1, SIN3A, ZFP93, RNF141, SRRM1, RC3H2, PMS2, MLL3, LUC7L3, MYST3, H1F0, NEIL3, RXRA, RCOR1, SIX2, ZFP629, PPARGC1A, TOX2, PA2G4, KDM2A, MTF1, RFC1, SMARCAL1, ZFP263, MGA, FUS, ZFAND5, RAD23B, ZFAND3, HMGB4, TNRC18, GPBP1L1, SOX5, SOX4, ELK1, SOX9, NR2C2, ZC3H8, ZFP451, RPL7, TEF, PBRM1, SUPV3L1, RAD51L3, LHX9, TCF25, HNRNPAB, SETDB1, DN…	912	1781	13288	1.53801	3.59809e-07	3.59809e-07	6.57642e-07
GOTERM_MF_FAT	GO:0008270~zinc ion binding	204	13.0853	7.91019e-08	ALPPL2, DZIP3, DZIP1, RNF216, RORB, ZFP91, ZFP93, LUC7L2, CYHR1, RXRA, ZFP629, ZFP826, ADAMTS9, ADAMTS8, MTF1, BAZ1B, MLLT10, ACAP2, EIF2S2, ZNHIT1, YME1L1, UNC13C, FUS, AKAP13, DUSP12, ZFP458, ZFP454, ZFP451, LHX9, ADH6B, ASXL2, ZC3H13, DNMT3A, 6720457D02RIK, ZC3H15, IKZF2, KLF12, ANKMY2, CREBBP, ASXL1, ZFP97, ZFP449, ZFP445, ZFP606, TAX1BP1, ZBTB43, ADAP2, TRPS1, BCL6B, PRKRIR, KLF3, ZFP385B, S…	912	2105	13288	1.41203	6.6918e-05	3.34595e-05	0.000122313
GOTERM_MF_FAT	GO:0046914~transition metal ion binding	239	15.3303	4.61599e-07	ALPPL2, SC5D, DZIP3, DZIP1, RNF216, RORB, ZFP91, ZFP93, LUC7L2, CYHR1, RXRA, ZFP629, CYP1A2, ZFP826, ADAMTS9, EIF2AK1, ADAMTS8, MTF1, BAZ1B, MLLT10, ACAP2, EIF2S2, ZNHIT1, YME1L1, UNC13C, FUS, AKAP13, DUSP12, SFXN2, ZFP458, ZFP454, ZFP451, LHX9, ADH6B, ASXL2, ZC3H13, DNMT3A, IKZF2, ZC3H15, 6720457D02RIK, SCD2, KLF12, ASXL1, ANKMY2, CREBBP, ZFP97, ZFP449, ZFP445, ZFP606, TAX1BP1, ZBTB43, ADAP2, TR…	912	2608	13288	1.33523	0.000390436	0.000130162	0.000713757
GOTERM_MF_FAT	GO:0046872~metal ion binding	322	20.6543	1.27377e-05	SYT1, SC5D, ALPPL2, DZIP3, ATP1B2, DZIP1, ADCY5, S100A9, RORB, RNF216, AURKB, ITSN2, MAP3K7, ATP2B2, ZFP91, ZFP93, LUC7L2, CYHR1, F10, RXRA, SCN2A1, ZFP629, CYP1A2, ZFP826, ADAMTS9, EIF2AK1, ADAMTS8, BAZ1B, MTF1, MLLT10, EIF2S2, ACAP2, RYR1, ZNHIT1, YME1L1, UNC13C, PLA2G2E, ADD2, ADD1, LALBA, FUS, CDK5R1, SCN1A, PPP2R3A, NEK1, AKAP13, DUSP12, SFXN2, CACNB4, ZFP458, KCNJ1, ZFP454, ZFP451, LPCAT1, …	912	3850	13288	1.2186	0.0107183	0.00269041	0.0196942
GOTERM_MF_FAT	GO:0043167~ion binding	327	20.975	1.7566e-05	SYT1, SC5D, ALPPL2, DZIP3, ATP1B2, DZIP1, ADCY5, S100A9, RORB, RNF216, AURKB, ITSN2, MAP3K7, ATP2B2, ZFP91, ZFP93, LUC7L2, CYHR1, F10, RXRA, SCN2A1, ZFP629, CYP1A2, ZFP826, ADAMTS9, EIF2AK1, ADAMTS8, BAZ1B, MTF1, MLLT10, EIF2S2, ACAP2, RYR1, ZNHIT1, YME1L1, UNC13C, PLA2G2E, ADD2, ADD1, LALBA, FUS, CDK5R1, SCN1A, PPP2R3A, NEK1, AKAP13, DUSP12, SFXN2, CACNB4, ZFP458, KCNJ1, ZFP454, ZFP451, LPCAT1, …	912	3934	13288	1.21109	0.0147511	0.00296778	0.0271584
GOTERM_MF_FAT	GO:0000166~nucleotide binding	197	12.6363	1.94881e-05	FASTKD1, ADCY5, XRCC6, CCT3, AURKB, SART3, PRKG1, C230081A13RIK, 2310057M21RIK, MAP3K7, KIF13A, ATP2B2, MOS, PIK3CA, TLK1, DHX36, KIF13B, GBP8, KIF5B, SRP54A, SRP54B, SRP54C, PIK3CD, KIF5C, WNK1, MYH4, NAV3, PPARGC1A, PPARGC1B, EIF2AK1, RFC1, DHX29, BAZ1B, ASCC3, SMARCAL1, RAB14, CAMK1, YME1L1, FUS, CHKA, GNAI1, NEK1, STK17B, CHEK1, KCNJ1, QRSL1, SUPV3L1, NAT10, HNRNPAB, TAOK1, TAOK3, UBE2L3, DDX…	912	2183	13288	1.31485	0.0163519	0.00274407	0.0301297
GOTERM_MF_FAT	GO:0043169~cation binding	323	20.7184	2.04061e-05	SYT1, SC5D, ALPPL2, DZIP3, ATP1B2, DZIP1, ADCY5, S100A9, RORB, RNF216, AURKB, ITSN2, MAP3K7, ATP2B2, ZFP91, ZFP93, LUC7L2, CYHR1, F10, RXRA, SCN2A1, ZFP629, CYP1A2, ZFP826, ADAMTS9, EIF2AK1, ADAMTS8, BAZ1B, MTF1, MLLT10, EIF2S2, ACAP2, RYR1, ZNHIT1, YME1L1, UNC13C, PLA2G2E, ADD2, ADD1, LALBA, FUS, CDK5R1, SCN1A, PPP2R3A, NEK1, AKAP13, DUSP12, SFXN2, CACNB4, ZFP458, KCNJ1, ZFP454, ZFP451, LPCAT1, …	912	3885	13288	1.21137	0.0171156	0.00246321	0.0315489
GOTERM_MF_FAT	GO:0005524~ATP binding	137	8.78768	5.43159e-05	FASTKD1, D5ERTD579E, PRPF4B, ADCY5, XRCC6, INO80, RPS6KB1, AURKB, CCT3, PRKG1, C230081A13RIK, 2310057M21RIK, KIF13A, MAP3K7, ATP2B2, TOP1, CSNK2A1, MOS, PIK3CA, PMS2, DHX36, TLK1, PRKACB, KIF13B, EGFR, NMNAT3, KIF5B, KIF5C, PIK3CD, WNK1, MYH4, STK4, STK3, EIF2AK1, RFC1, DHX29, BAZ1B, ASCC3, RIOK3, ATP9B, SMARCAL1, CAMK1, YME1L1, CHKA, GNE, STK11, NEK1, BMPR2, STK17B, CHEK1, KCNJ1, IRAK4, QRSL1, D…	912	1443	13288	1.38331	0.0449126	0.00572759	0.0839543
GOTERM_MF_FAT	GO:0032559~adenyl ribonucleotide binding	138	8.85183	6.23435e-05	FASTKD1, D5ERTD579E, PRPF4B, ADCY5, XRCC6, INO80, RPS6KB1, AURKB, CCT3, PRKG1, C230081A13RIK, 2310057M21RIK, KIF13A, MAP3K7, ATP2B2, TOP1, CSNK2A1, MOS, PIK3CA, PMS2, DHX36, TLK1, PRKACB, KIF13B, EGFR, NMNAT3, KIF5B, KIF5C, PIK3CD, WNK1, MYH4, STK4, STK3, EIF2AK1, RFC1, DHX29, BAZ1B, ASCC3, RIOK3, ATP9B, SMARCAL1, CAMK1, YME1L1, CHKA, GNE, STK11, NEK1, BMPR2, STK17B, CHEK1, KCNJ1, IRAK4, QRSL1, D…	912	1460	13288	1.37718	0.0513774	0.00584333	0.0963568
GOTERM_MF_FAT	GO:0030554~adenyl nucleotide binding	143	9.17255	8.70087e-05	GRPEL2, FASTKD1, D5ERTD579E, PRPF4B, ADCY5, XRCC6, INO80, RPS6KB1, AURKB, CCT3, PRKG1, C230081A13RIK, 2310057M21RIK, KIF13A, MAP3K7, ATP2B2, TOP1, CSNK2A1, MOS, PIK3CA, PMS2, DHX36, TLK1, PRKACB, KIF13B, EGFR, NMNAT3, KIF5B, KIF5C, PIK3CD, WNK1, MYH4, STK4, STK3, EIF2AK1, RFC1, DHX29, BAZ1B, ASCC3, RIOK3, ATP9B, SMARCAL1, CAMK1, YME1L1, CHKA, GNE, STK11, NEK1, BMPR2, STK17B, CHEK1, KCNJ1, IRAK4, …	912	1535	13288	1.35735	0.0709684	0.00733423	0.134455
GOTERM_MF_FAT	GO:0001882~nucleoside binding	144	9.23669	0.000118396	GRPEL2, FASTKD1, D5ERTD579E, PRPF4B, ADCY5, XRCC6, INO80, RPS6KB1, AURKB, CCT3, PRKG1, C230081A13RIK, 2310057M21RIK, KIF13A, MAP3K7, ATP2B2, TOP1, CSNK2A1, MOS, PIK3CA, PMS2, TLK1, DHX36, PRKACB, KIF13B, EGFR, NMNAT3, KIF5B, KIF5C, PIK3CD, WNK1, MYH4, STK4, STK3, EIF2AK1, RFC1, DHX29, BAZ1B, ASCC3, RIOK3, ATP9B, SMARCAL1, CAMK1, YME1L1, CHKA, GNE, STK11, NEK1, BMPR2, STK17B, CHEK1, KCNJ1, IRAK4, …	912	1558	13288	1.34667	0.0953158	0.00906496	0.182917
GOTERM_MF_FAT	GO:0001883~purine nucleoside binding	143	9.17255	0.000135826	GRPEL2, FASTKD1, D5ERTD579E, PRPF4B, ADCY5, XRCC6, INO80, RPS6KB1, AURKB, CCT3, PRKG1, C230081A13RIK, 2310057M21RIK, KIF13A, MAP3K7, ATP2B2, TOP1, CSNK2A1, MOS, PIK3CA, PMS2, DHX36, TLK1, PRKACB, KIF13B, EGFR, NMNAT3, KIF5B, KIF5C, PIK3CD, WNK1, MYH4, STK4, STK3, EIF2AK1, RFC1, DHX29, BAZ1B, ASCC3, RIOK3, ATP9B, SMARCAL1, CAMK1, YME1L1, CHKA, GNE, STK11, NEK1, BMPR2, STK17B, CHEK1, KCNJ1, IRAK4, …	912	1548	13288	1.34595	0.10856	0.00953068	0.209818
GOTERM_MF_FAT	GO:0030528~transcription regulator activity	116	7.44067	0.000137956	MEF2A, HIRA, RORB, PDX1, MED20, TAF7L, CBX5, MLL5, SIN3A, MYST3, RXRA, SIX2, MED13, PPARGC1A, PPARGC1B, MED19, PA2G4, RFC1, MTF1, ZFP263, MGA, LRCH4, FUS, NFKBIE, SOX5, SOX4, ELK1, SOX9, NR2C2, ZC3H8, MED12L, RPL7, TEF, BCOR, TCF25, LHX9, HNRNPAB, TRIP4, IKZF2, KLF12, GSX1, MAML2, CREBBP, ZFP449, 2210012G02RIK, ZFP445, ATF4, NOTCH1, HOXB2, CSRNP3, TRPS1, EBF1, BCL6B, RBPJ, NCOR1, BACH1, ELF1, ELF…	912	1206	13288	1.40144	0.110164	0.00893816	0.213105
GOTERM_MF_FAT	GO:0032555~purine ribonucleotide binding	162	10.3913	0.000142386	GNA13, FASTKD1, D5ERTD579E, PRPF4B, ADCY5, XRCC6, EIF5, INO80, RPS6KB1, AURKB, CCT3, PRKG1, C230081A13RIK, 2310057M21RIK, KIF13A, MAP3K7, ATP2B2, TOP1, CSNK2A1, MOS, PIK3CA, PMS2, RALA, TLK1, DHX36, PRKACB, KIF13B, GBP8, EGFR, NMNAT3, NUDT2, KIF5B, SRP54A, SRP54B, SRP54C, KIF5C, PIK3CD, WNK1, MYH4, STK4, STK3, EIF2AK1, RFC1, DHX29, BAZ1B, ASCC3, RIOK3, ATP9B, SMARCAL1, RAB14, CAMK1, YME1L1, GBP4,…	912	1796	13288	1.31424	0.113494	0.00856788	0.219941
GOTERM_MF_FAT	GO:0032553~ribonucleotide binding	162	10.3913	0.000142386	GNA13, FASTKD1, D5ERTD579E, PRPF4B, ADCY5, XRCC6, EIF5, INO80, RPS6KB1, AURKB, CCT3, PRKG1, C230081A13RIK, 2310057M21RIK, KIF13A, MAP3K7, ATP2B2, TOP1, CSNK2A1, MOS, PIK3CA, PMS2, RALA, TLK1, DHX36, PRKACB, KIF13B, GBP8, EGFR, NMNAT3, NUDT2, KIF5B, SRP54A, SRP54B, SRP54C, KIF5C, PIK3CD, WNK1, MYH4, STK4, STK3, EIF2AK1, RFC1, DHX29, BAZ1B, ASCC3, RIOK3, ATP9B, SMARCAL1, RAB14, CAMK1, YME1L1, GBP4,…	912	1796	13288	1.31424	0.113494	0.00856788	0.219941
GOTERM_MF_FAT	GO:0017076~purine nucleotide binding	167	10.712	0.000180162	GNA13, GRPEL2, FASTKD1, D5ERTD579E, PRPF4B, ADCY5, XRCC6, EIF5, INO80, RPS6KB1, AURKB, CCT3, PRKG1, C230081A13RIK, 2310057M21RIK, KIF13A, MAP3K7, ATP2B2, TOP1, CSNK2A1, MOS, RALA, PMS2, PIK3CA, TLK1, DHX36, PRKACB, KIF13B, GBP8, EGFR, NMNAT3, NUDT2, KIF5B, SRP54A, SRP54B, SRP54C, KIF5C, PIK3CD, WNK1, MYH4, STK4, STK3, EIF2AK1, RFC1, DHX29, BAZ1B, ASCC3, RIOK3, ATP9B, SMARCAL1, RAB14, CAMK1, YME1L…	912	1871	13288	1.30049	0.141382	0.0101106	0.278217
GOTERM_MF_FAT	GO:0003743~translation initiation factor activity	14	0.898012	0.000242089	EIF5, DENR, EIF3C, EIF4G1, EIF2AK1, DHX29, EIF3E, EIF2S1, TRMT6, EIF2S2, EIF3L, EIF3J, EIF2C3, EIF4E2	912	62	13288	3.29004	0.185216	0.0127204	0.373682
GOTERM_MF_FAT	GO:0003682~chromatin binding	24	1.53945	0.000359424	DNMT3A, PPP2R3A, ARID4A, CREBBP, ARID4B, HIRA, PAX3, MBD2, CBX5, ATRX, NOTCH1, CHD8, SIN3A, BAZ1B, SMARCC1, ATXN7, PBRM1, RNF168, RBPJ, CUX1, SMC1A, CHD6, CHD4, MED1	912	155	13288	2.25603	0.262233	0.0177308	0.554327
GOTERM_MF_FAT	GO:0008017~microtubule binding	13	0.833868	0.00076547	KIF5B, CKAP5, HOOK3, KIF1B, TMOD3, CLIP1, CLASP1, PAFAH1B1, APPBP2, CLASP2, MAPRE1, DST, APC	912	61	13288	3.10512	0.476823	0.0353509	1.1771
GOTERM_MF_FAT	GO:0016563~transcription activator activity	32	2.0526	0.00170695	FUS, DCC, MEF2A, ELF2, COPS5, UBE3A, SOX4, ELK1, PAX3, PDX1, SOX9, MLL5, CHD8, TEF, MKL2, ETV4, MYSM1, MYST3, IKZF2, SOX11, MAML2, CREBBP, MED13, PPARGC1A, PPARGC1B, JMY, ATF4, MTF1, THRAP3, RBM39, RBPJ, MED1	912	259	13288	1.80018	0.764328	0.073248	2.60709
GOTERM_MF_FAT	GO:0016564~transcription repressor activity	27	1.73188	0.00259896	BCLAF1, ELF1, NFKBIE, PAX3, ZBTB16, ZC3H8, CBX5, MSX3, CHD8, SIN3A, BCOR, ZBTB7A, TBL1XR1, NACC1, SCAI, IRF2BP2, HIPK1, RFC1, TRPS1, NAB2, PHB2, ZFP263, BCL6B, ZFP281, LRCH4, CUX1, NCOR1	912	211	13288	1.86443	0.889372	0.104237	3.94406
GOTERM_MF_FAT	GO:0008094~DNA-dependent ATPase activity	9	0.577293	0.00365626	CHD8, RBBP4, RFC1, BPTF, CCNH, HELB, SMARCAL1, XRCC6, RAD51L3	912	38	13288	3.45083	0.9549	0.137194	5.50653
GOTERM_MF_FAT	GO:0016566~specific transcriptional repressor activity	7	0.449006	0.00375192	MSX3, NACC1, RFC1, PHB2, PAX3, ZBTB16, ZC3H8	912	23	13288	4.4344	0.958418	0.134588	5.64673
GOTERM_MF_FAT	GO:0015631~tubulin binding	13	0.833868	0.00530599	KIF5B, CKAP5, HOOK3, KIF1B, TMOD3, CLIP1, CLASP1, PAFAH1B1, APPBP2, CLASP2, MAPRE1, DST, APC	912	76	13288	2.49227	0.9889	0.177731	7.89709
GOTERM_MF_FAT	GO:0008092~cytoskeletal protein binding	43	2.75818	0.00678507	MTSS1, CDK5R1, ENAH, FHL3, RDX, DAAM1, WHAMM, HOOK3, NRCAM, SPNB2, PAFAH1B1, CLASP1, DLG5, CLASP2, MKL2, APPBP2, APC, PLEC, TWF1, KIF5B, MYO1C, CKAP5, ENC1, MYH4, RPH3A, FLNB, JMY, EPB4.1L2, SYNE1, YWHAG, KIF1B, GMFG, MYO15, MTAP1B, TMOD2, MAPK8IP2, MAPK8IP3, TMOD3, CLIP1, MAPRE1, DST, ADD2, ADD1	912	414	13288	1.51333	0.996848	0.213363	9.99216
GOTERM_MF_FAT	GO:0008135~translation factor activity, nucleic acid binding	15	0.962155	0.00680043	EIF5, DENR, 2210012G02RIK, EIF3C, EIF4G1, EIF2AK1, DHX29, TRMT6, EIF3E, EIF2S1, EIF2S2, EIF3L, EIF3J, EIF2C3, EIF4E2	912	98	13288	2.23013	0.996889	0.206191	10.0137
GOTERM_MF_FAT	GO:0003713~transcription coactivator activity	15	0.962155	0.0081178	DCC, COPS5, UBE3A, MAML2, CREBBP, MED13, PPARGC1A, PPARGC1B, JMY, MLL5, THRAP3, RBM39, MKL2, MYSM1, MED1	912	100	13288	2.18553	0.998988	0.232962	11.8417
GOTERM_MF_FAT	GO:0003712~transcription cofactor activity	22	1.41116	0.0116772	DCC, TBL1XR1, COPS5, UBE3A, MAML2, CREBBP, SCAI, IRF2BP2, MED13, PPARGC1A, PPARGC1B, JMY, MLL5, SIN3A, HIPK1, THRAP3, MKL2, RBM39, BCOR, NCOR1, MYSM1, MED1	912	180	13288	1.7808	0.999952	0.307909	16.6085
GOTERM_MF_FAT	GO:0003723~RNA binding	62	3.97691	0.0144667	DZIP3, CPEB3, CPEB4, DICER1, RBM4, RBM5, TLR3, SART3, CNOT4, FUBP1, RBM4B, ANKRD17, TIA1, PIWIL2, SRRM1, PUM2, LUC7L3, SRP54A, EXOSC4, SRP54B, SNUPN, SRP54C, MRPS5, MBNL1, MBD2, PPARGC1A, ZFR2, PPARGC1B, EIF4G1, SLTM, RBPMS, PA2G4, AQR, EIF2S1, PABPN1L, SERBP1, CPSF6, RBM39, EIF2C3, FUS, TDRD3, HDLBP, 0610009D07RIK, TRA2B, NUFIP2, DDX46, RPL7, SEPSECS, NSUN3, BAZ2A, HNRNPAB, GEMIN5, RBM26, RAD51A…	912	672	13288	1.34427	0.999996	0.356154	20.1747
GOTERM_MF_FAT	GO:0003700~transcription factor activity	70	4.49006	0.0147794	BACH1, MEF2A, ELF1, ELF2, FOXK2, PAX6, RORB, ZKSCAN1, PAX3, PDX1, RHOX4E, RHOX4F, RHOX4G, ZBTB38, RHOX4B, RHOX4A, RHOX4D, RHOX4C, SIN3A, HSF2, ALX1, RXRA, SOX11, GMEB1, ESR1, SIX2, MYT1L, PA2G4, MTF1, ZFP263, MGA, CUX1, TBX18, CLOCK, ZFP397, SOX5, ELK1, ZBTB16, SOX9, NR2C2, ZC3H8, TSC22D1, MSX3, TEF, GATAD2B, POU3F2, TCF25, LHX9, ETV4, HNRNPAB, ERF, ERG, KLF12, GSX1, ZFP449, AFF3, CREB5, ZFP445, …	912	776	13288	1.31432	0.999997	0.352326	20.5654
GOTERM_MF_FAT	GO:0016702~oxidoreductase activity, acting on single donors with incorporation of molecular oxygen, incorporation of two atoms of oxygen	11	0.705581	0.0169086	HIF1AN, KDM2A, P4HA1, ALOX12E, UTY, KDM4A, KDM5A, ALKBH2, TET1, BCO2, KDM5C	912	68	13288	2.35694	0.999999	0.381773	23.1788
GOTERM_MF_FAT	GO:0016887~ATPase activity	30	1.92431	0.0178072	ABCF1, ATP1B2, XRCC6, DICER1, INO80, 2310057M21RIK, ATP2B2, CHD8, DDX46, DHX36, ABCD4, RAD51L3, CHD6, CHD4, RHOBTB3, RBBP4, CCNH, IPO8, ABCB7, DDX6, KIF1B, BPTF, RFC1, DHX29, ASCC3, ATP9B, HELB, SMARCAL1, ABCC5, ATP8A1	912	281	13288	1.55553	1	0.387583	24.2574
GOTERM_MF_FAT	GO:0016701~oxidoreductase activity, acting on single donors with incorporation of molecular oxygen	11	0.705581	0.0186013	HIF1AN, KDM2A, P4HA1, ALOX12E, UTY, KDM4A, KDM5A, ALKBH2, TET1, BCO2, KDM5C	912	69	13288	2.32278	1	0.391285	25.1988
GOTERM_MF_FAT	GO:0042623~ATPase activity, coupled	25	1.60359	0.0186913	ATP1B2, XRCC6, DICER1, ATP2B2, CHD8, DDX46, ABCD4, DHX36, RAD51L3, CHD6, CHD4, RBBP4, CCNH, IPO8, ABCB7, DDX6, BPTF, RFC1, DHX29, ATP9B, HELB, ASCC3, SMARCAL1, ABCC5, ATP8A1	912	223	13288	1.63343	1	0.38351	25.3049
GOTERM_MF_FAT	GO:0016247~channel regulator activity	6	0.384862	0.0213486	SCLT1, KCNS1, NRXN3, NEDD4, HTT, NRXN1	912	24	13288	3.64254	1	0.415475	28.3719
GOTERM_MF_FAT	GO:0004221~ubiquitin thiolesterase activity	11	0.705581	0.0223551	USP7, STAMBP, OTUD5, BRCC3, USP8, USP1, USP37, USP36, USP48, MYSM1, USP45	912	71	13288	2.25735	1	0.421019	29.5025
GOTERM_MF_FAT	GO:0016879~ligase activity, forming carbon-nitrogen bonds	22	1.41116	0.0238759	UBE3A, HACE1, HLCS, CAD, HERC2, UBE2H, CBLL1, HERC1, RLIM, UBE2L3, TTLL1, UBE2B, TTLL13, FEM1A, TTLL3, QRSL1, TTLL10, WWP2, NEDD4, SMURF2, RNF168, TRIP12	912	193	13288	1.66085	1	0.43328	31.1793
GOTERM_MF_FAT	GO:0003678~DNA helicase activity	6	0.384862	0.0252225	CHD8, HELB, SMARCAL1, XRCC6, INO80, SUPV3L1	912	25	13288	3.49684	1	0.442396	32.6328
GOTERM_MF_FAT	GO:0016279~protein-lysine N-methyltransferase activity	6	0.384862	0.0295192	SETDB1, MLL5, EZH1, SETD8, MLL3, SUV420H1	912	26	13288	3.36235	1	0.486798	37.0809
GOTERM_MF_FAT	GO:0018024~histone-lysine N-methyltransferase activity	6	0.384862	0.0295192	SETDB1, MLL5, EZH1, SETD8, MLL3, SUV420H1	912	26	13288	3.36235	1	0.486798	37.0809
GOTERM_MF_FAT	GO:0016278~lysine N-methyltransferase activity	6	0.384862	0.0295192	SETDB1, MLL5, EZH1, SETD8, MLL3, SUV420H1	912	26	13288	3.36235	1	0.486798	37.0809
GOTERM_MF_FAT	GO:0005248~voltage-gated sodium channel activity	4	0.256575	0.0349852	SCN1A, SCN2A1, SCN7A, SCN10A	912	11	13288	5.29825	1	0.538145	42.3429
GOTERM_MF_FAT	GO:0016881~acid-amino acid ligase activity	19	1.21873	0.0356345	UBE3A, HACE1, UBE2H, CBLL1, HERC2, HERC1, RLIM, UBE2L3, TTLL1, UBE2B, TTLL13, FEM1A, TTLL3, TTLL10, WWP2, NEDD4, SMURF2, RNF168, TRIP12	912	166	13288	1.66767	1	0.535794	42.9399
GOTERM_MF_FAT	GO:0019904~protein domain specific binding	21	1.34702	0.0401948	RAP2B, HSP90AB1, MTSS1, IRS2, ENAH, USP8, HSP90AA1, PTEN, PPARGC1B, DOCK4, CTR9, EPB4.1L2, ATXN2, ATP2B2, SON, YWHAG, SH3KBP1, DNAJC6, TGFBR3, LUC7L, NCOR1	912	192	13288	1.59361	1	0.571093	46.9725
GOTERM_MF_FAT	GO:0046983~protein dimerization activity	33	2.11674	0.0418115	BACH1, CHKA, GRPEL2, SOX5, RRAGA, ZBTB16, PDSS2, RPL7, HSF2, DGKD, PVRL3, SYN2, TEF, PAFAH1B1, GABPB2, ALX1, IKZF2, HSP90AA1, TFPT, CREB5, STK4, STK3, ATF4, EIF2AK1, TIMELESS, SBF2, VEGFA, ZC3H11A, PBX1, IRF3, IL12B, CRYBA1, PRKRIR	912	340	13288	1.41416	1	0.576972	48.3369
GOTERM_MF_FAT	GO:0008013~beta-catenin binding	5	0.320718	0.044059	CHD8, CSNK2A1, DLG5, TCF7L2, APC	912	20	13288	3.64254	1	0.587909	50.1792
GOTERM_MF_FAT	GO:0051082~unfolded protein binding	10	0.641437	0.0488405	HSP90AB1, GRPEL2, PFDN1, CCT5, CCT4, HSP90AA1, DNAJB14, DNAJC5, CCT3, DNAJA2	912	70	13288	2.08145	1	0.618169	53.8962
GOTERM_MF_FAT	GO:0004674~protein serine/threonine kinase activity	39	2.5016	0.0489791	PRPF4B, STK11, NEK1, STK17B, BMPR2, CHEK1, RPS6KB1, AURKB, PRKG1, MAP3K7, IRAK4, CSNK2A1, MAP3K2, CDK12, MOS, TLK1, PRKACB, PRKAA2, DCLK1, PRKCA, SRPK2, TAOK1, CCNH, TAOK3, WNK1, SMG1, STK4, STK3, MAST4, BC021891, ACVR2B, EIF2AK1, HIPK1, RPS6KA2, RIOK3, MAPK14, CAMK1, TGFBR3, BUB1B	912	421	13288	1.34973	1	0.610979	54
GOTERM_MF_FAT	GO:0016251~general RNA polymerase II transcription factor activity	6	0.384862	0.0511273	MED19, MED13, MED20, TAF7L, MED12L, MED1	912	30	13288	2.91404	1	0.619088	55.5807
GOTERM_MF_FAT	GO:0019208~phosphatase regulator activity	7	0.449006	0.053259	PPP2R3A, CSNK2A1, SBF2, PPP2R5C, CABIN1, PPP2R5E, WBP11	912	40	13288	2.54978	1	0.626611	57.0989
GOTERM_MF_FAT	GO:0043565~sequence-specific DNA binding	49	3.14304	0.0567934	BACH1, MEF2A, ELF1, ELF2, FOXK2, PAX6, RORB, PDX1, PAX3, RHOX4E, RHOX4F, RHOX4G, RHOX4B, RHOX4A, RHOX4D, RHOX4C, HSF2, ALX1, RXRA, SOX11, ESR1, SIX2, MBD2, BPTF, CUX1, ELK1, SOX9, NR2C2, MSX3, TEF, GATAD2B, POU3F2, LHX9, ETV4, HNRNPAB, ERF, ERG, SMG6, GSX1, CREB5, ATRX, NOTCH1, ATF4, HOXB2, TRPS1, ZFP281, PBX1, RBPJ, NCOR1	912	556	13288	1.28406	1	0.643183	59.5096
GOTERM_MF_FAT	GO:0004672~protein kinase activity	51	3.27133	0.0582221	FASTKD1, PRPF4B, CAD, RPS6KB1, AURKB, PRKG1, C230081A13RIK, INSRR, MAP3K7, CSNK2A1, CDK12, MOS, TLK1, PRKACB, EGFR, PRKCA, SRPK2, TWF1, CCNH, WNK1, STK4, STK3, MAST4, BC021891, ACVR2B, CCND1, EIF2AK1, BAZ1B, HIPK1, RIOK3, CAMK1, BUB1B, STK11, NEK1, STK17B, BMPR2, CHEK1, IRAK4, MAP3K2, PRKAA2, DCLK1, TAOK1, FLT4, TAOK3, MET, SMG1, RPS6KA2, MAPK14, JAK1, TGFBR3, ABL2	912	583	13288	1.27458	1	0.645013	60.4477
GOTERM_MF_FAT	GO:0004386~helicase activity	15	0.962155	0.0585029	DICER1, XRCC6, INO80, DDX6, ATRX, CHD8, DDX46, DHX29, ASCC3, HELB, SMARCAL1, DHX36, SUPV3L1, CHD6, CHD4	912	129	13288	1.69421	1	0.639407	60.6296
GOTERM_MF_FAT	GO:0016455~RNA polymerase II transcription mediator activity	5	0.320718	0.0597453	MED19, MED13, MED20, MED12L, MED1	912	22	13288	3.3114	1	0.640093	61.4254
GOTERM_MF_FAT	GO:0016407~acetyltransferase activity	9	0.577293	0.0649457	MOGAT2, LPCAT1, CREBBP, NAT2, MGEA5, NAA15, NAT10, CLOCK, MYST3	912	63	13288	2.08145	1	0.66462	64.5956
GOTERM_MF_FAT	GO:0008026~ATP-dependent helicase activity	11	0.705581	0.0691387	CHD8, DDX46, DHX29, ASCC3, HELB, DICER1, XRCC6, DHX36, CHD6, CHD4, DDX6	912	86	13288	1.86363	1	0.681335	66.9725
GOTERM_MF_FAT	GO:0070035~purine NTP-dependent helicase activity	11	0.705581	0.0691387	CHD8, DDX46, DHX29, ASCC3, HELB, DICER1, XRCC6, DHX36, CHD6, CHD4, DDX6	912	86	13288	1.86363	1	0.681335	66.9725
GOTERM_MF_FAT	GO:0042803~protein homodimerization activity	20	1.28287	0.0707114	CHKA, GRPEL2, IKZF2, HSP90AA1, RRAGA, ZBTB16, STK4, EIF2AK1, RPL7, TIMELESS, SBF2, HSF2, DGKD, PVRL3, VEGFA, IRF3, PAFAH1B1, IL12B, CRYBA1, GABPB2	912	193	13288	1.50986	1	0.683024	67.8249
GOTERM_MF_FAT	GO:0003729~mRNA binding	8	0.513149	0.0743653	RPL7, SERBP1, PABPN1L, RBM5, PIWIL2, MBD2, LUC7L3, SLBP	912	54	13288	2.15854	1	0.695365	69.7264
GOTERM_MF_FAT	GO:0042393~histone binding	5	0.320718	0.0780002	CHD8, BAZ1B, RNF168, BAZ2A, MYSM1	912	24	13288	3.03545	1	0.706787	71.5133
GOTERM_MF_FAT	GO:0005159~insulin-like growth factor receptor binding	3	0.192431	0.0782991	YWHAG, IGF1, PIK3R1	912	7	13288	6.24436	1	0.701846	71.6558
GOTERM_MF_FAT	GO:0004835~tubulin-tyrosine ligase activity	4	0.256575	0.0787626	TTLL10, TTLL1, TTLL13, TTLL3	912	15	13288	3.88538	1	0.697785	71.8754
GOTERM_MF_FAT	GO:0042054~histone methyltransferase activity	6	0.384862	0.0799831	SETDB1, MLL5, EZH1, SETD8, MLL3, SUV420H1	912	34	13288	2.57121	1	0.6974	72.4461
GOTERM_MF_FAT	GO:0008276~protein methyltransferase activity	7	0.449006	0.0850829	SETDB1, MLL5, EZH1, SETD8, MLL3, SUV420H1, N6AMT1	912	45	13288	2.26647	1	0.714581	74.7155
GOTERM_MF_FAT	GO:0003690~double-stranded DNA binding	6	0.384862	0.0883136	ANKRD17, RAD51AP1, TDG, TEF, PMS2, ZBTB16	912	35	13288	2.49774	1	0.722602	76.0613
GOTERM_MF_FAT	GO:0003779~actin binding	27	1.73188	0.090331	MTSS1, ENAH, FHL3, RDX, DAAM1, WHAMM, SPNB2, MKL2, PLEC, TWF1, MYO1C, ENC1, MYH4, RPH3A, FLNB, JMY, EPB4.1L2, YWHAG, SYNE1, GMFG, MTAP1B, MYO15, TMOD2, TMOD3, DST, ADD2, ADD1	912	288	13288	1.36595	1	0.725238	76.8675
GOTERM_MF_FAT	GO:0008134~transcription factor binding	27	1.73188	0.090331	DCC, COPS5, UBE3A, MLL5, SIN3A, MKL2, BCOR, CHD4, MYSM1, MYST3, TBL1XR1, MAML2, CREBBP, SCAI, IRF2BP2, MED13, PPARGC1A, PPARGC1B, JMY, BPTF, HIPK1, THRAP3, RBM39, RBPJ, NCOR1, CLOCK, MED1	912	288	13288	1.36595	1	0.725238	76.8675
GOTERM_MF_FAT	GO:0022843~voltage-gated cation channel activity	14	0.898012	0.0997269	SCN1A, SCN2A1, KCTD20, CACNB4, KCNJ1, KCNS3, KCNS1, KCNJ9, KCNE1, RYR1, KCTD12B, SCN7A, KCNQ2, SCN10A	912	128	13288	1.59361	1	0.756044	80.2985
GOTERM_MF_FAT	GO:0051018~protein kinase A binding	3	0.192431	0.0997805	PALM2, LRBA, AKAP4	912	8	13288	5.46382	1	0.750803	80.3166
INTERPRO	IPR001487:Bromodomain	15	0.962155	9.55033e-08	BRD1, ZMYND11, BRD2, SP100, BRD3, CREBBP, PHIP, BRWD1, BAZ1B, BPTF, PBRM1, BRD4, BAZ2B, BAZ2A, BRD8	1182	39	17763	5.77997	0.000156327	0.000156327	0.000160359
INTERPRO	IPR019786:Zinc finger, PHD-type, conserved site	22	1.41116	1.75262e-07	ASXL2, ZMYND11, BRD1, RSF1, ASXL1, DPF1, ATRX, PHF3, MLL5, PHF2, BAZ1B, KDM2A, BPTF, PHF13, MLLT10, KDM4A, KDM5A, PHF20L1, BAZ2A, CHD4, KDM5C, MYST3	1182	87	17763	3.80016	0.000286863	0.000143442	0.000294282
INTERPRO	IPR018359:Bromodomain, conserved site	13	0.833868	4.58057e-07	BRD1, BRD2, BRD3, CREBBP, PHIP, BRWD1, BPTF, BAZ1B, PBRM1, BRD4, BAZ2B, BAZ2A, BRD8	1182	32	17763	6.10509	0.000749558	0.000249915	0.00076912
INTERPRO	IPR019787:Zinc finger, PHD-finger	20	1.28287	1.07391e-06	BRD1, ZMYND11, RSF1, DPF1, PHF3, MLL5, PHF2, BAZ1B, KDM2A, BPTF, PHF13, MLLT10, KDM4A, MLL3, KDM5A, BAZ2B, BAZ2A, CHD4, KDM5C, MYST3	1182	81	17763	3.7106	0.00175645	0.000439401	0.00180318
INTERPRO	IPR001965:Zinc finger, PHD-type	20	1.28287	6.81686e-06	BRD1, ZMYND11, RSF1, DPF1, PHF3, MLL5, PHF2, BAZ1B, KDM2A, BPTF, PHF13, MLLT10, KDM4A, MLL3, KDM5A, BAZ2B, BAZ2A, CHD4, KDM5C, MYST3	1182	91	17763	3.30284	0.0110972	0.00222936	0.0114456
INTERPRO	IPR000910:High mobility group, HMG1/HMG2	14	0.898012	2.05237e-05	HMGB4, SOX11, SOX12, BBX, SOX5, SOX4, SOX9, TCF7L2, TOX2, UBTF, HMGXB4, PBRM1, HBP1, MLL3	1182	51	17763	4.12531	0.0330395	0.00558395	0.0344557
INTERPRO	IPR000357:HEAT	13	0.833868	5.23784e-05	HTT, CKAP5, SMG1, NCAPD3, AI314180, HEATR6, 2310035C23RIK, CLASP1, MRO, CLASP2, PSME4, KPNB1, TNPO1	1182	48	17763	4.07006	0.0821724	0.0121747	0.0879122
INTERPRO	IPR013069:BTB/POZ	22	1.41116	0.000104374	BACH1, ZBTB7A, NACC1, ZBTB12, ENC1, BTBD7, GAN, ZBTB16, BTBD9, ZBTB43, ZBTB38, KLHL5, GMCL1, KLHL28, ZFP295, BCL6B, RHOBTB1, ZBTB5, KLHL24, ANKFY1, KBTBD11, RHOBTB3	1182	128	17763	2.58292	0.157068	0.0211321	0.17511
INTERPRO	IPR000210:BTB/POZ-like	26	1.66774	0.000369131	BACH1, ZBTB12, ZBTB16, ZBTB38, KCNS3, KLHL5, KCNS1, KLHL28, ZFP295, RHOBTB1, KLHL24, RHOBTB3, ZBTB7A, NACC1, ENC1, BTBD7, KCTD20, GAN, BTBD9, ZBTB43, GMCL1, BCL6B, ZBTB5, KCTD12B, KBTBD11, ANKFY1	1182	180	17763	2.1707	0.453586	0.064948	0.618004
INTERPRO	IPR011333:BTB/POZ fold	25	1.60359	0.000866524	BACH1, ZBTB12, ZBTB16, ZBTB38, KCNS3, KCNS1, KLHL5, KLHL28, ZFP295, RHOBTB1, RHOBTB3, ZBTB7A, NACC1, ENC1, BTBD7, KCTD20, GAN, BTBD9, ZBTB43, GMCL1, BCL6B, ZBTB5, KCTD12B, KBTBD11, ANKFY1	1182	180	17763	2.08721	0.758072	0.132302	1.44507
INTERPRO	IPR001876:Zinc finger, RanBP2-type	8	0.513149	0.000937402	FUS, NUP153, SOLH, TAF15, NEIL3, RBM5, MDM4, RANBP2	1182	25	17763	4.80893	0.784597	0.130266	1.56239
INTERPRO	IPR018500:DDT subgroup	4	0.256575	0.00111447	BAZ1B, BPTF, BAZ2B, BAZ2A	1182	4	17763	15.0279	0.838848	0.141113	1.85493
INTERPRO	IPR000569:HECT	8	0.513149	0.00154072	NEDD4, WWP2, UBE3A, HACE1, SMURF2, HERC2, HERC1, TRIP12	1182	27	17763	4.45272	0.91987	0.176475	2.55579
INTERPRO	IPR015880:Zinc finger, C2H2-like	66	4.23348	0.0016964	ZFP385B, ZMAT4, DZIP1, RBM5, ZKSCAN1, ZFP871, ZFP870, ZBTB38, ZFP783, ZFP784, ZFP644, ZFP91, ZFP93, ZFP882, ZFP426, ZFP629, ZFR2, ZFP826, MTF1, ZFP263, ZFP397, SCAPER, ZBTB12, ZFP398, ZBTB16, CBLL1, ZFP458, ZFP318, DPF1, ZFP454, ZFP451, ZFP668, RNF166, 6330416L07RIK, ZFP295, ZFP664, ZFP292, 4933426I21RIK, ZFP53, ZBTB7A, 6720457D02RIK, IKZF2, ZFP248, KLF12, ZFP97, ZFP449, CREB5, 4930422I07RIK, ZFP…	1182	676	17763	1.46722	0.937923	0.180062	2.8106
INTERPRO	IPR000504:RNA recognition motif, RNP-1	27	1.73188	0.00186104	FUS, RBM33, CPEB3, TRA2B, 0610009D07RIK, CPEB4, RBM4, RBM5, SART3, CNOT4, RBM4B, TIA1, ACIN1, RBM25, RBM26, HNRNPAB, PPARGC1A, PPARGC1B, SAFB2, SLTM, RBPMS, TAF15, SFPQ, PABPN1L, PPRC1, CPSF6, RBM39	1182	212	17763	1.91393	0.952611	0.183959	3.07937
INTERPRO	IPR006594:LisH dimerisation motif	8	0.513149	0.00193789	WDR47, TBL1XR1, 2310035C23RIK, NOLC1, GM5124, ARMC9, VPRBP, PAFAH1B1	1182	28	17763	4.29369	0.958223	0.18001	3.2046
INTERPRO	IPR003034:DNA-binding SAP	7	0.449006	0.00252526	SLTM, MAMSTR, XRCC6, ACIN1, MKL2, SAFB2, SF3B2	1182	22	17763	4.78161	0.984063	0.216101	4.15667
INTERPRO	IPR018501:DDT superfamily	4	0.256575	0.00264806	BAZ1B, BPTF, BAZ2B, BAZ2A	1182	5	17763	12.0223	0.986972	0.214273	4.35459
INTERPRO	IPR011993:Pleckstrin homology-type	33	2.11674	0.00318704	ENAH, FERMT3, AKAP13, RDX, CYTH3, ITSN2, SH2D5, TIAM2, DAPP1, COL4A3BP, SPNB2, SPRED2, RANBP3, SPRED1, RANBP2, RASA1, CNKSR2, DNM3, IRS2, PLEKHJ1, OSBPL9, PSD4, 3830431G21RIK, PLEKHA4, EPB4.1L2, TNS3, PLEKHA5, DOK3, ADAP2, KIF1B, SBF2, ACAP2, MAPK8IP2	1182	289	17763	1.71599	0.994622	0.240449	5.2188
INTERPRO	IPR002110:Ankyrin	27	1.73188	0.00374598	NFKBIE, FEM1A, ANKRD36, ANKRD52, ANKRD17, ANK2, ANK3, ANKRD11, PPP1R12A, TNKS, BCOR, GABPB2, ANKMY2, ANKS3, HACE1, ANKHD1, TNKS2, ANKRD45, ANKRD26, ANKRD44, ANKRD13C, NOTCH1, ZDHHC13, ACAP2, NOTCH4, ANKFY1, ASB7	1182	223	17763	1.81952	0.997853	0.264485	6.10723
INTERPRO	IPR012677:Nucleotide-binding, alpha-beta plait	26	1.66774	0.00405136	FUS, CPEB3, TRA2B, 0610009D07RIK, CPEB4, RBM4, RBM5, SART3, CNOT4, RBM4B, TIA1, ACIN1, RBM25, RBM26, HNRNPAB, PPARGC1A, PPARGC1B, SAFB2, SLTM, RBPMS, TAF15, SFPQ, PABPN1L, PPRC1, CPSF6, RBM39	1182	213	17763	1.83439	0.9987	0.271272	6.58932
INTERPRO	IPR011989:Armadillo-like helical	18	1.15459	0.0056384	CKAP5, HEATR1, IPO8, NCAPD3, AI314180, HEATR6, ZYG11B, 2310035C23RIK, ARMC9, CLASP1, PUM2, CLASP2, TNPO1, KPNB1, KPNA2, TRIP12, KPNA1, APC	1182	130	17763	2.08079	0.999904	0.343436	9.05746
INTERPRO	IPR019734:Tetratricopeptide repeat	16	1.0263	0.00723379	BBS4, UTY, TTC30A1, NAA15, NAA16, CDC16, TTC3, CEP70, CTR9, ST13, P4HA1, CABIN1, TMTC3, ANAPC7, RANBP2, APPBP2	1182	112	17763	2.14685	0.999993	0.403531	11.4767
INTERPRO	IPR000555:Mov34/MPN/PAD-1	5	0.320718	0.00855658	STAMBP, BRCC3, COPS5, PSMD7, MYSM1	1182	13	17763	5.77997	0.999999	0.44353	13.4365
INTERPRO	IPR007087:Zinc finger, C2H2-type	62	3.97691	0.010654	ZFP385B, DZIP1, RBM5, ZKSCAN1, ZFP871, ZFP870, ZBTB38, ZFP783, ZFP784, ZFP644, ZFP91, ZFP93, ZFP882, ZFP426, ZFP629, ZFR2, ZFP826, MTF1, ZFP263, ZFP397, SCAPER, ZBTB12, ZFP398, ZBTB16, CBLL1, ZFP458, ZFP318, DPF1, ZFP454, ZFP451, ZFP668, 6330416L07RIK, ZFP295, ZFP664, ZFP292, 4933426I21RIK, ZFP53, ZBTB7A, 6720457D02RIK, IKZF2, ZFP248, KLF12, ZFP97, ZFP449, CREB5, 4930422I07RIK, ZFP445, ZFP606, ZB…	1182	681	17763	1.36818	1	0.504092	16.4605
INTERPRO	IPR000953:Chromo domain	7	0.449006	0.0107981	CHD8, ARID4A, SMARCC1, ARID4B, CHD6, CHD4, CBX5	1182	29	17763	3.62743	1	0.495183	16.6645
INTERPRO	IPR001606:AT-rich interaction region	5	0.320718	0.0113578	ARID4A, ARID5B, ARID4B, KDM5A, KDM5C	1182	14	17763	5.36711	1	0.499706	17.4528
INTERPRO	IPR004882:LUC7 related	3	0.192431	0.0126645	LUC7L2, LUC7L, LUC7L3	1182	3	17763	15.0279	1	0.525336	19.2657
INTERPRO	IPR017386:SOX-12/11/4a	3	0.192431	0.0126645	SOX11, SOX12, SOX4	1182	3	17763	15.0279	1	0.525336	19.2657
INTERPRO	IPR000330:SNF2-related	7	0.449006	0.0149502	ATRX, CHD8, SMARCAL1, INO80, CHD6, SRCAP, CHD4	1182	31	17763	3.3934	1	0.572706	22.3472
INTERPRO	IPR001841:Zinc finger, RING-type	30	1.92431	0.0155752	ZMYND11, XIAP, DZIP3, CBLL1, RLIM, TTC3, CNOT4, DPF1, RNF141, PCGF3, RNF166, RNF38, RC3H2, HIST3H2A, RNF168, MLL3, TRAF6, CHD4, RNF32, MYST3, RNF13, DTX3, ZFP449, ATRX, RNF43, RNF130, RNF115, BAZ1B, MDM4, RNF20	1182	286	17763	1.57636	1	0.575387	23.1705
INTERPRO	IPR003347:Transcription factor jumonji/aspartyl beta-hydroxylase	7	0.449006	0.0173928	PHF2, HIF1AN, KDM2A, UTY, KDM4A, KDM5A, KDM5C	1182	32	17763	3.28736	1	0.604075	25.5179
INTERPRO	IPR000571:Zinc finger, CCCH-type	9	0.577293	0.018484	ZC3H13, ZC3H15, ZC3H4, RC3H2, ZC3H11A, LENG9, MBNL1, ZC3H8, RBM26	1182	51	17763	2.65199	1	0.614966	26.8947
INTERPRO	IPR001202:WW/Rsp5/WWP	9	0.577293	0.018484	MAGI2, NEDD4, WWP2, BAG3, WWC2, SMURF2, WAC, WWOX, PRPF40A	1182	51	17763	2.65199	1	0.614966	26.8947
INTERPRO	IPR000717:Proteasome component region PCI	5	0.320718	0.0185715	EIF3C, PSMD11, EIF3E, COPS4, PSMD6	1182	16	17763	4.69622	1	0.605415	27.004
INTERPRO	IPR013129:Transcription factor jumonji	6	0.384862	0.0189567	PHF2, KDM2A, UTY, KDM4A, KDM5A, KDM5C	1182	24	17763	3.75698	1	0.602068	27.4836
INTERPRO	IPR013026:Tetratricopeptide region	15	0.962155	0.0189568	BBS4, UTY, TTC30A1, NAA15, NAA16, CDC16, TTC3, CTR9, ST13, P4HA1, CABIN1, TMTC3, ANAPC7, RANBP2, APPBP2	1182	114	17763	1.97736	1	0.591452	27.4837
INTERPRO	IPR013761:Sterile alpha motif-type	11	0.705581	0.0202856	PHC3, CNKSR2, ERG, SAMD12, DGKD, ANKS3, TNKS, SFMBT1, ZCCHC14, SFMBT2, TNKS2	1182	72	17763	2.29593	1	0.606202	29.1155
INTERPRO	IPR002999:Tudor domain	6	0.384862	0.0224331	SETDB1, TDRD3, ARID4A, ARID4B, KDM4A, PHF20L1	1182	25	17763	3.6067	1	0.633522	31.6797
INTERPRO	IPR011991:Winged helix repressor DNA-binding	20	1.28287	0.0238726	H1F0, ERF, ELF1, ERG, ELF2, COPS4, FOXK2, PAX6, ELK1, PAX3, EIF3C, HIST1H1T, CUL5, HSF2, PSMD11, RGS6, RAPGEF5, IRF3, ETV4, MYST3	1182	175	17763	1.71748	1	0.646857	33.3495
INTERPRO	IPR004022:DDT family	3	0.192431	0.0242145	BPTF, BAZ2B, BAZ2A	1182	4	17763	11.2709	1	0.642599	33.7403
INTERPRO	IPR008271:Serine/threonine protein kinase, active site	35	2.24503	0.0246924	PRPF4B, STK11, NEK1, STK17B, BMPR2, RPS6KB1, CHEK1, AURKB, PRKG1, MAP3K7, IRAK4, CSNK2A1, MAP3K2, CDK12, MOS, TLK1, PRKACB, PRKAA2, DCLK1, PRKCA, SRPK2, TAOK1, TAOK3, WNK1, STK4, STK3, MAST4, BC021891, ACVR2B, EIF2AK1, HIPK1, RPS6KA2, MAPK14, CAMK1, BUB1B	1182	360	17763	1.46105	1	0.640565	34.2832
INTERPRO	IPR001696:Na+ channel	4	0.256575	0.0247118	SCN1A, SCN2A1, SCN7A, SCN10A	1182	10	17763	6.01117	1	0.631774	34.305
INTERPRO	IPR010526:Sodium ion transport-associated	4	0.256575	0.0247118	SCN1A, SCN2A1, SCN7A, SCN10A	1182	10	17763	6.01117	1	0.631774	34.305
INTERPRO	IPR000418:Ets	6	0.384862	0.0262973	ERF, ERG, ELF1, ELF2, ELK1, ETV4	1182	26	17763	3.46798	1	0.646081	36.0755
INTERPRO	IPR014021:Helicase, superfamily 1 and 2, ATP-binding	13	0.833868	0.0311146	DICER1, INO80, DDX6, ATRX, CHD8, DDX46, DHX29, ASCC3, SMARCAL1, DHX36, CHD6, SRCAP, CHD4	1182	99	17763	1.97336	1	0.699811	41.1833
INTERPRO	IPR001739:Methyl-CpG DNA binding	4	0.256575	0.0323305	SETDB1, BAZ2B, MBD2, BAZ2A	1182	11	17763	5.4647	1	0.705571	42.4106
INTERPRO	IPR001650:DNA/RNA helicase, C-terminal	13	0.833868	0.0333045	DICER1, INO80, DDX6, ATRX, CHD8, DDX46, DHX29, ASCC3, SMARCAL1, SUPV3L1, DHX36, CHD6, CHD4	1182	100	17763	1.95363	1	0.708343	43.3761
INTERPRO	IPR001715:Calponin-like actin-binding	10	0.641437	0.0354267	SYNE1, NAV2, SPNB2, LRCH3, LRCH4, NAV3, MAPRE1, DST, FLNB, PLEC	1182	68	17763	2.20999	1	0.722962	45.4275
INTERPRO	IPR000164:Histone H3	3	0.192431	0.0385921	CENPA, HIST1H3B, HIST1H3H	1182	5	17763	9.01675	1	0.746091	48.358
INTERPRO	IPR014001:DEAD-like helicase, N-terminal	13	0.833868	0.0405304	DICER1, INO80, DDX6, ATRX, CHD8, DDX46, DHX29, ASCC3, SMARCAL1, DHX36, CHD6, SRCAP, CHD4	1182	103	17763	1.89673	1	0.756112	50.0786
INTERPRO	IPR017441:Protein kinase, ATP binding site	42	2.69403	0.0419748	PRPF4B, STK11, NEK1, STK17B, BMPR2, CHEK1, RPS6KB1, AURKB, PRKG1, C230081A13RIK, INSRR, MAP3K7, IRAK4, CSNK2A1, MAP3K2, CDK12, MOS, TLK1, PRKACB, PRKAA2, DCLK1, PRKCA, EGFR, SRPK2, TAOK1, FLT4, MET, TAOK3, WNK1, STK4, STK3, MAST4, BC021891, ACVR2B, EIF2AK1, HIPK1, RPS6KA2, MAPK14, CAMK1, BUB1B, JAK1, ABL2	1182	467	17763	1.35155	1	0.761308	51.3256
INTERPRO	IPR001005:SANT, DNA-binding	8	0.513149	0.0420377	DMTF1, SMARCC1, EZH1, RCOR1, GON4L, CHD6, NCOR1, MYSM1	1182	49	17763	2.45354	1	0.754897	51.3792
INTERPRO	IPR001440:Tetratricopeptide TPR-1	12	0.769724	0.0503218	ST13, BBS4, UTY, TTC30A1, CABIN1, NAA16, TMTC3, CDC16, ANAPC7, RANBP2, TTC3, CTR9	1182	95	17763	1.89826	1	0.809345	57.977
INTERPRO	IPR001312:Hexokinase	3	0.192431	0.0553709	GCK, GNE, HK2	1182	6	17763	7.51396	1	0.833579	61.5751
INTERPRO	IPR014020:Tensin phosphatase, C2 domain	3	0.192431	0.0553709	TNS3, DNAJC6, PTEN	1182	6	17763	7.51396	1	0.833579	61.5751
INTERPRO	IPR017442:Serine/threonine protein kinase-related	34	2.18089	0.0588137	PRPF4B, STK11, NEK1, STK17B, BMPR2, RPS6KB1, CHEK1, AURKB, PRKG1, MAP3K7, IRAK4, CSNK2A1, MAP3K2, CDK12, MOS, TLK1, PRKACB, PRKAA2, DCLK1, PRKCA, SRPK2, TAOK1, TAOK3, WNK1, STK4, STK3, MAST4, BC021891, ACVR2B, EIF2AK1, HIPK1, RPS6KA2, MAPK14, CAMK1	1182	374	17763	1.36617	1	0.846212	63.8601
INTERPRO	IPR002423:Chaperonin Cpn60/TCP-1	4	0.256575	0.0615122	CCT5, CCT4, HSPD1, CCT3	1182	14	17763	4.29369	1	0.854058	65.5611
INTERPRO	IPR001660:Sterile alpha motif SAM	11	0.705581	0.0626499	PHC3, CNKSR2, DDHD2, SAMD12, DGKD, ANKS3, TNKS, SFMBT1, ZCCHC14, SFMBT2, TNKS2	1182	87	17763	1.90008	1	0.85422	66.2554
INTERPRO	IPR004344:Tubulin-tyrosine ligase	4	0.256575	0.0732186	TTLL10, TTLL1, TTLL13, TTLL3	1182	15	17763	4.00745	1	0.891688	72.1057
INTERPRO	IPR001494:Importin-beta, N-terminal	4	0.256575	0.0732186	IPO8, XPO7, KPNB1, TNPO1	1182	15	17763	4.00745	1	0.891688	72.1057
INTERPRO	IPR011990:Tetratricopeptide-like helical	16	1.0263	0.0741008	NAPG, UTY, TTC30A1, NAA15, NAA16, CDC16, 9130404D08RIK, TTC3, CTR9, ST13, P4HA1, CABIN1, TMTC3, ANAPC7, RANBP2, APPBP2	1182	150	17763	1.60298	1	0.89042	72.5482
INTERPRO	IPR014019:Phosphatase tensin type	3	0.192431	0.0741686	TNS3, DNAJC6, PTEN	1182	7	17763	6.44054	1	0.886397	72.5819
INTERPRO	IPR003307:eIF4-gamma/eIF5/eIF2-epsilon	3	0.192431	0.0741686	BZW2, EIF4G1, EIF5	1182	7	17763	6.44054	1	0.886397	72.5819
INTERPRO	IPR013720:LisH dimerisation motif, subgroup	3	0.192431	0.0741686	TBL1XR1, VPRBP, PAFAH1B1	1182	7	17763	6.44054	1	0.886397	72.5819
INTERPRO	IPR018459:RII binding domain	3	0.192431	0.0741686	PALM2, AKAP13, AKAP4	1182	7	17763	6.44054	1	0.886397	72.5819
INTERPRO	IPR002652:Importin-alpha-like, importin-beta-binding region	3	0.192431	0.0741686	SNUPN, KPNA2, KPNA1	1182	7	17763	6.44054	1	0.886397	72.5819
INTERPRO	IPR004820:Cytidylyltransferase	3	0.192431	0.0741686	NMNAT3, PCYT1A, PCYT1B	1182	7	17763	6.44054	1	0.886397	72.5819
INTERPRO	IPR002290:Serine/threonine protein kinase	25	1.60359	0.0767607	PRPF4B, STK11, NEK1, STK17B, RPS6KB1, CHEK1, AURKB, PRKG1, CSNK2A1, MAP3K2, CDK12, TLK1, PRKAA2, PRKACB, DCLK1, PRKCA, TAOK1, TAOK3, STK4, STK3, MAST4, HIPK1, RPS6KA2, MAPK14, CAMK1	1182	265	17763	1.41773	1	0.890952	73.8427
INTERPRO	IPR000719:Protein kinase, core	42	2.69403	0.0778588	PRPF4B, STK11, NEK1, STK17B, BMPR2, CHEK1, RPS6KB1, AURKB, PRKG1, C230081A13RIK, INSRR, MAP3K7, IRAK4, CSNK2A1, MAP3K2, CDK12, MOS, TLK1, PRKACB, PRKAA2, DCLK1, PRKCA, EGFR, SRPK2, TAOK1, FLT4, MET, TAOK3, WNK1, STK4, STK3, MAST4, BC021891, ACVR2B, EIF2AK1, HIPK1, RPS6KA2, MAPK14, CAMK1, BUB1B, JAK1, ABL2	1182	491	17763	1.28548	1	0.890464	74.3602
INTERPRO	IPR001019:Guanine nucleotide binding protein (G-protein), alpha subunit	4	0.256575	0.0858295	GNA13, GNAL, GNAI1, GNAS	1182	16	17763	3.75698	1	0.910025	77.838
INTERPRO	IPR000209:Peptidase S8 and S53, subtilisin, kexin, sedolisin	4	0.256575	0.0858295	PCSK2, PCSK9, ODZ1, 6030446N20RIK	1182	16	17763	3.75698	1	0.910025	77.838
INTERPRO	IPR018253:Heat shock protein DnaJ, conserved site	7	0.449006	0.089642	DNAJB7, DNAJC27, DNAJB14, DNAJC6, DNAJC21, DNAJC5, DNAJA2	1182	47	17763	2.2382	1	0.916233	79.3399
INTERPRO	IPR001589:Actinin-type, actin-binding, conserved site	5	0.320718	0.0905538	SYNE1, SPNB2, DST, FLNB, PLEC	1182	26	17763	2.88998	1	0.91511	79.6846
INTERPRO	IPR000008:C2 calcium-dependent membrane targeting	14	0.898012	0.091648	PRKCA, SYT1, WWC2, ITSN2, RPH3A, RIMS4, WWP2, NEDD4, RASAL3, PIK3CA, SMURF2, UNC13C, PLCB1, RASA1	1182	130	17763	1.61839	1	0.91445	80.0911
KEGG_PATHWAY	mmu04914:Progesterone-mediated oocyte maturation	15	0.962155	0.00045958	HSP90AB1, HSP90AA1, GNAI1, ADCY5, PIK3CD, IGF1, PDE3A, CDC16, RPS6KA2, MAPK14, MOS, PIK3CA, PRKACB, ANAPC7, PIK3R1	345	85	5738	2.93504	0.0730431	0.0730431	0.556428
KEGG_PATHWAY	mmu05215:Prostate cancer	15	0.962155	0.000832066	HSP90AB1, EGFR, HSP90AA1, CREBBP, PIK3CD, IGF1, CREB5, TCF7L2, PTEN, INSRR, CCND1, ATF4, CDKN1B, PIK3CA, PIK3R1	345	90	5738	2.77198	0.128333	0.066369	1.00532
KEGG_PATHWAY	mmu04150:mTOR signaling pathway	11	0.705581	0.00117679	STK11, RPS6KA2, PIK3CD, VEGFA, IGF1, PIK3CA, RPS6KB1, PRKAA2, RICTOR, PIK3R1, EIF4E2	345	54	5738	3.38798	0.176576	0.0627088	1.4191
KEGG_PATHWAY	mmu04620:Toll-like receptor signaling pathway	15	0.962155	0.00214216	PIK3CD, TLR3, TLR4, CCL4, MAP3K7, IRAK4, IFNA2, CD80, MAPK14, PIK3CA, IFNA11, IRF3, IL12B, TRAF6, PIK3R1	345	99	5738	2.51998	0.298009	0.0846592	2.56942
KEGG_PATHWAY	mmu04630:Jak-STAT signaling pathway	19	1.21873	0.00404905	IL2RA, STAM2, CREBBP, PIK3CD, LIFR, IL7R, PTPN11, IFNA2, ZFP91, CCND1, CNTF, SPRED2, JAK1, PIK3CA, IFNA11, CSF2RB, IL12B, SPRED1, GH, PIK3R1	345	152	5738	2.07899	0.48801	0.125314	4.80555
KEGG_PATHWAY	mmu05200:Pathways in cancer	32	2.0526	0.00568195	HSP90AB1, DCC, XIAP, FGF10, ZBTB16, TCF7L2, PTEN, PIK3CA, RALA, TPR, TRAF6, PIK3R1, APC, EGFR, PRKCA, HSP90AA1, RALBP1, RXRA, CYCS, MET, CREBBP, PIK3CD, IGF1, STK4, FZD7, WNT2B, CCND1, LAMA4, CDKN1B, VEGFA, JAK1, PTCH2	345	323	5738	1.64774	0.609449	0.145039	6.68283
KEGG_PATHWAY	mmu04144:Endocytosis	22	1.41116	0.00909288	EGFR, FAM125B, STAMBP, LOC676708, H2-Q2, DNM3, PARD3, USP8, H2-L, CLTB, IL2RA, CHMP5, STAM2, MET, H2-D1, PSD4, TFRC, NEDD4, ACAP2, SH3KBP1, DNAJC6, SMURF2, TRAF6, EPN2	345	202	5738	1.81139	0.778468	0.193711	10.4951
KEGG_PATHWAY	mmu05213:Endometrial cancer	9	0.577293	0.0113971	EGFR, CCND1, PIK3CD, ELK1, PIK3CA, PTEN, TCF7L2, PIK3R1, APC	345	52	5738	2.8786	0.849127	0.210547	12.989
KEGG_PATHWAY	mmu04960:Aldosterone-regulated sodium reabsorption	8	0.513149	0.0114531	PRKCA, IRS2, ATP1B2, PIK3CD, IGF1, PIK3CA, PIK3R1, KCNJ1	345	42	5738	3.16798	0.850531	0.190376	13.0489
KEGG_PATHWAY	mmu04310:Wnt signaling pathway	17	1.09044	0.0161284	PRKCA, TBL1XR1, PPP2R5C, CREBBP, DAAM1, TCF7L2, FZD7, WNT2B, MAP3K7, CCND1, CHD8, CSNK2A1, PRICKLE1, PPP2R5E, PRKACB, PLCB1, APC	345	149	5738	1.8976	0.931634	0.235312	17.9111
KEGG_PATHWAY	mmu04912:GnRH signaling pathway	12	0.769724	0.0296736	EGFR, PRKCA, ATF4, MAP3K2, ADCY5, MAPK14, ELK1, GNAS, PRKACB, PLA2G2E, PLCB1, CALM1	345	97	5738	2.05755	0.993059	0.363545	30.6248
KEGG_PATHWAY	mmu05222:Small cell lung cancer	11	0.705581	0.0297822	LAMA4, CCND1, CDKN1B, XIAP, RXRA, PIK3CD, CYCS, PIK3CA, TRAF6, PTEN, PIK3R1	345	85	5738	2.15236	0.993186	0.340139	30.7189
KEGG_PATHWAY	mmu05210:Colorectal cancer	11	0.705581	0.0319808	DCC, EGFR, CCND1, PIK3CD, MET, CYCS, PIK3CA, TCF7L2, PIK3R1, FZD7, APC	345	86	5738	2.12733	0.995313	0.338035	32.6008
KEGG_PATHWAY	mmu04120:Ubiquitin mediated proteolysis	15	0.962155	0.0324415	XIAP, UBE3A, UBE2H, CDC16, HERC2, HERC1, UBE2L3, UBE2B, CUL5, WWP2, NEDD4, SMURF2, ANAPC7, TRAF6, TRIP12	345	136	5738	1.8344	0.995667	0.322053	32.9891
KEGG_PATHWAY	mmu04070:Phosphatidylinositol signaling system	10	0.641437	0.0341858	PRKCA, INPP1, INPP5K, DGKD, PIK3CD, PIK3CA, PLCB1, PTEN, PIK3R1, CALM1	345	75	5738	2.21758	0.996783	0.317929	34.4408
KEGG_PATHWAY	mmu04916:Melanogenesis	12	0.769724	0.0360682	PRKCA, GNAI1, ADCY5, CREBBP, GNAS, PRKACB, POMC, PLCB1, TCF7L2, FZD7, CALM1, WNT2B	345	100	5738	1.99583	0.997668	0.315336	35.9751
KEGG_PATHWAY	mmu05214:Glioma	9	0.577293	0.0360995	EGFR, PRKCA, CCND1, PIK3CD, IGF1, PIK3CA, PTEN, PIK3R1, CALM1	345	64	5738	2.33886	0.997681	0.300128	36.0003
KEGG_PATHWAY	mmu04910:Insulin signaling pathway	15	0.962155	0.0361271	IRS2, PIK3CD, HK2, ELK1, PDE3A, RPS6KB1, PPARGC1A, INPP5K, GCK, PIK3CA, PRKAA2, PRKACB, PIK3R1, EIF4E2, CALM1	345	138	5738	1.80781	0.997692	0.286302	36.0226
KEGG_PATHWAY	mmu05223:Non-small cell lung cancer	8	0.513149	0.0408472	EGFR, PRKCA, CCND1, RXRA, PIK3CD, PIK3CA, STK4, PIK3R1	345	54	5738	2.46398	0.998973	0.303839	39.7235
KEGG_PATHWAY	mmu04010:MAPK signaling pathway	24	1.53945	0.0452878	EGFR, PRKCA, IL1R2, TAOK1, TAOK3, FGF10, ELK1, CACNB4, FLNB, STK4, STK3, MAP3K7, DUSP3, ATF4, RPS6KA2, MAP3K2, MAPK14, MOS, MAPK8IP2, MAPK8IP3, PRKACB, TRAF6, PLA2G2E, RASA1	345	265	5738	1.50628	0.999523	0.317743	43.0249
KEGG_PATHWAY	mmu04115:p53 signaling pathway	9	0.577293	0.0528139	CCND1, PPM1D, CYCS, IGF1, CHEK1, RRM2B, MDM4, PTEN, SESN3	345	69	5738	2.16938	0.999871	0.347096	48.2436
KEGG_PATHWAY	mmu05218:Melanoma	9	0.577293	0.0606937	EGFR, CCND1, PIK3CD, MET, IGF1, FGF10, PIK3CA, PTEN, PIK3R1	345	71	5738	2.10827	0.999967	0.374749	53.2345
KEGG_PATHWAY	mmu04730:Long-term depression	9	0.577293	0.0648964	GNA13, PRKCA, GNAI1, RYR1, IGF1, GNAS, PLA2G2E, PRKG1, PLCB1	345	72	5738	2.07899	0.999984	0.382054	55.712
KEGG_PATHWAY	mmu05212:Pancreatic cancer	9	0.577293	0.0648964	EGFR, CCND1, RALBP1, PIK3CD, VEGFA, RALA, JAK1, PIK3CA, PIK3R1	345	72	5738	2.07899	0.999984	0.382054	55.712
KEGG_PATHWAY	mmu04930:Type II diabetes mellitus	7	0.449006	0.0707267	IRS2, GCK, PIK3CD, HK2, PIK3CA, PDX1, PIK3R1	345	49	5738	2.37598	0.999994	0.39607	58.9498
KEGG_PATHWAY	mmu04540:Gap junction	10	0.641437	0.0709634	EGFR, PRKCA, GNAI1, MAP3K2, ADCY5, TUBA3A, GNAS, PRKACB, PRKG1, PLCB1	345	86	5738	1.93394	0.999995	0.3848	59.0766
KEGG_PATHWAY	mmu00100:Steroid biosynthesis	4	0.256575	0.0777484	SC5D, HSD17B7, SC4MOL, DHCR24	345	17	5738	3.91338	0.999998	0.401686	62.5604
KEGG_PATHWAY	mmu04114:Oocyte meiosis	12	0.769724	0.0825782	YWHAG, RPS6KA2, ADCY5, PPP2R5C, MOS, IGF1, PPP2R5E, CDC16, ANAPC7, PRKACB, SMC1A, CALM1	345	115	5738	1.7355	0.999999	0.409452	64.8722
KEGG_PATHWAY	mmu04510:Focal adhesion	18	1.15459	0.0840748	PRKCA, EGFR, XIAP, FLT4, MET, PIK3CD, ELK1, IGF1, MYL12B, ITGA4, PTEN, FLNB, CCND1, LAMA4, VEGFA, PPP1R12A, PIK3CA, PIK3R1	345	198	5738	1.51199	0.999999	0.404	65.5615
KEGG_PATHWAY	mmu04722:Neurotrophin signaling pathway	13	0.833868	0.088573	IRS2, NFKBIE, PIK3CD, PTPN11, IRAK4, ATF4, YWHAG, RPS6KA2, MAPK14, PIK3CA, TRAF6, PIK3R1, CALM1	345	130	5738	1.66319	1	0.410028	67.5592
PIR_SUPERFAMILY	PIRSF038098:SOX-12/11/4a	3	0.192431	0.00874511	SOX11, SOX12, SOX4	449	3	8136	18.1203	0.98886	0.98886	11.9186
PIR_SUPERFAMILY	PIRSF038098:SOX-12/11/4a protein	3	0.192431	0.00874511	SOX11, SOX12, SOX4	449	3	8136	18.1203	0.98886	0.98886	11.9186
PIR_SUPERFAMILY	PIRSF028830:Luc7/Luc7-like protein	3	0.192431	0.00874511	LUC7L2, LUC7L, LUC7L3	449	3	8136	18.1203	0.98886	0.98886	11.9186
PIR_SUPERFAMILY	PIRSF002051:histone H3	3	0.192431	0.0270726	CENPA, HIST1H3B, HIST1H3H	449	5	8136	10.8722	0.999999	0.999112	32.7362
PIR_SUPERFAMILY	PIRSF002584:molecular chaperone t-complex-type	3	0.192431	0.0842442	CCT5, CCT4, CCT3	449	9	8136	6.04009	1	1	71.9601
PIR_SUPERFAMILY	PIRSF002448:voltage-gated sodium channel	3	0.192431	0.0842442	SCN1A, SCN7A, SCN10A	449	9	8136	6.04009	1	1	71.9601
SMART	SM00297:BROMO	15	0.962155	1.00311e-06	BRD1, ZMYND11, BRD2, SP100, BRD3, CREBBP, PHIP, BRWD1, BAZ1B, BPTF, PBRM1, BRD4, BAZ2B, BAZ2A, BRD8	739	39	9131	4.75226	0.00031292	0.00031292	0.00134846
SMART	SM00249:PHD	20	1.28287	9.66031e-05	BRD1, ZMYND11, RSF1, DPF1, PHF3, MLL5, PHF2, BAZ1B, KDM2A, BPTF, PHF13, MLLT10, KDM4A, MLL3, KDM5A, BAZ2B, BAZ2A, CHD4, KDM5C, MYST3	739	91	9131	2.71558	0.0296919	0.0149578	0.129785
SMART	SM00398:HMG	14	0.898012	0.000150083	HMGB4, SOX11, SOX12, BBX, SOX5, SOX4, SOX9, TCF7L2, TOX2, UBTF, HMGXB4, PBRM1, HBP1, MLL3	739	51	9131	3.39181	0.0457498	0.0154886	0.201567
SMART	SM00571:DDT	4	0.256575	0.00197695	BAZ1B, BPTF, BAZ2B, BAZ2A	739	4	9131	12.3559	0.460666	0.143032	2.62516
SMART	SM00547:ZnF_RBZ	8	0.513149	0.00289083	FUS, NUP153, SOLH, TAF15, NEIL3, RBM5, MDM4, RANBP2	739	25	9131	3.95388	0.594747	0.165272	3.81699
SMART	SM00119:HECTc	8	0.513149	0.00463402	NEDD4, WWP2, UBE3A, HACE1, SMURF2, HERC2, HERC1, TRIP12	739	27	9131	3.661	0.765236	0.214574	6.05301
SMART	SM00225:BTB	26	1.66774	0.00520196	BACH1, ZBTB12, ZBTB16, ZBTB38, KCNS3, KLHL5, KCNS1, KLHL28, ZFP295, RHOBTB1, KLHL24, RHOBTB3, ZBTB7A, NACC1, ENC1, BTBD7, KCTD20, GAN, BTBD9, ZBTB43, GMCL1, BCL6B, ZBTB5, KCTD12B, KBTBD11, ANKFY1	739	180	9131	1.78474	0.80353	0.207422	6.77106
SMART	SM00667:LisH	8	0.513149	0.00575649	WDR47, TBL1XR1, 2310035C23RIK, NOLC1, GM5124, ARMC9, VPRBP, PAFAH1B1	739	28	9131	3.53025	0.834902	0.201605	7.46726
SMART	SM00513:SAP	7	0.449006	0.0066199	SLTM, MAMSTR, XRCC6, ACIN1, MKL2, SAFB2, SF3B2	739	22	9131	3.93142	0.874101	0.205667	8.54167
SMART	SM00232:JAB_MPN	5	0.320718	0.0167638	STAMBP, BRCC3, COPS5, PSMD7, MYSM1	739	13	9131	4.75226	0.99488	0.409901	20.3291
SMART	SM00360:RRM	27	1.73188	0.0209132	FUS, RBM33, CPEB3, TRA2B, 0610009D07RIK, CPEB4, RBM4, RBM5, SART3, CNOT4, RBM4B, TIA1, ACIN1, RBM25, RBM26, HNRNPAB, PPARGC1A, PPARGC1B, SAFB2, SLTM, RBPMS, TAF15, SFPQ, PABPN1L, PPRC1, CPSF6, RBM39	739	212	9131	1.57363	0.998632	0.450895	24.7321
SMART	SM00501:BRIGHT	5	0.320718	0.0219995	ARID4A, ARID5B, ARID4B, KDM5A, KDM5C	739	14	9131	4.41282	0.999032	0.43919	25.847
SMART	SM00298:CHROMO	7	0.449006	0.0260153	CHD8, ARID4A, SMARCC1, ARID4B, CHD6, CHD4, CBX5	739	29	9131	2.98246	0.999732	0.468808	29.8371
SMART	SM00088:PINT	5	0.320718	0.0351688	EIF3C, PSMD11, EIF3E, COPS4, PSMD6	739	16	9131	3.86121	0.999986	0.549715	38.2011
SMART	SM00028:TPR	16	1.0263	0.0355094	BBS4, UTY, TTC30A1, NAA15, NAA16, CDC16, TTC3, CEP70, CTR9, ST13, P4HA1, CABIN1, TMTC3, ANAPC7, RANBP2, APPBP2	739	112	9131	1.76513	0.999987	0.52859	38.4937
SMART	SM00248:ANK	27	1.73188	0.0365032	NFKBIE, FEM1A, ANKRD36, ANKRD52, ANKRD17, ANK2, ANK3, ANKRD11, PPP1R12A, TNKS, BCOR, GABPB2, ANKMY2, ANKS3, HACE1, ANKHD1, TNKS2, ANKRD45, ANKRD26, ANKRD44, ANKRD13C, NOTCH1, ZDHHC13, ACAP2, NOTCH4, ANKFY1, ASB7	739	223	9131	1.496	0.999991	0.515738	39.3402
SMART	SM00558:JmjC	7	0.449006	0.040446	PHF2, HIF1AN, KDM2A, UTY, KDM4A, KDM5A, KDM5C	739	32	9131	2.70285	0.999997	0.531272	42.5935
SMART	SM00333:TUDOR	6	0.384862	0.0466169	SETDB1, TDRD3, ARID4A, ARID4B, KDM4A, PHF20L1	739	25	9131	2.96541	1	0.562845	47.3627
SMART	SM00356:ZnF_C3H1	9	0.577293	0.0504245	ZC3H13, ZC3H15, ZC3H4, RC3H2, ZC3H11A, LENG9, MBNL1, ZC3H8, RBM26	739	51	9131	2.18045	1	0.572426	50.1195
SMART	SM00456:WW	9	0.577293	0.0504245	MAGI2, NEDD4, WWP2, BAG3, WWC2, SMURF2, WAC, WWOX, PRPF40A	739	51	9131	2.18045	1	0.572426	50.1195
SMART	SM00391:MBD	4	0.256575	0.0531404	SETDB1, BAZ2B, MBD2, BAZ2A	739	11	9131	4.49305	1	0.573366	52.0035
SMART	SM00413:ETS	6	0.384862	0.0540276	ERF, ERG, ELF1, ELF2, ELK1, ETV4	739	26	9131	2.85136	1	0.56185	52.6046
SMART	SM00428:H3	3	0.192431	0.0553447	CENPA, HIST1H3B, HIST1H3H	739	5	9131	7.41353	1	0.554004	53.4841
SMART	SM00355:ZnF_C2H2	66	4.23348	0.0750061	ZFP385B, ZMAT4, DZIP1, RBM5, ZKSCAN1, ZFP871, ZFP870, ZBTB38, ZFP783, ZFP784, ZFP644, ZFP91, ZFP93, ZFP882, ZFP426, ZFP629, ZFR2, ZFP826, MTF1, ZFP263, ZFP397, SCAPER, ZBTB12, ZFP398, ZBTB16, CBLL1, ZFP458, ZFP318, DPF1, ZFP454, ZFP451, ZFP668, RNF166, 6330416L07RIK, ZFP295, ZFP664, ZFP292, 4933426I21RIK, ZFP53, ZBTB7A, 6720457D02RIK, IKZF2, ZFP248, KLF12, ZFP97, ZFP449, CREB5, 4930422I07RIK, ZFP…	739	676	9131	1.20634	1	0.652731	64.9404
SMART	SM00033:CH	10	0.641437	0.0955036	SYNE1, NAV2, SPNB2, LRCH3, LRCH4, NAV3, MAPRE1, DST, FLNB, PLEC	739	68	9131	1.81704	1	0.7288	74.0593
SMART	SM00717:SANT	8	0.513149	0.0971338	DMTF1, SMARCC1, EZH1, RCOR1, GON4L, CHD6, NCOR1, MYSM1	739	49	9131	2.01729	1	0.72063	74.6809
SP_PIR_KEYWORDS	phosphoprotein	643	41.2444	1.60574e-37	ALPPL2, MEF2A, VPS54, XRCC6, PPP2R5C, NAA15, STOML2, VPRBP, ITSN2, INTS3, SART3, C230081A13RIK, ACBD5, AI314180, MAP3K7, ACBD3, INTS8, CUL5, LUC7L2, TLK1, LUC7L3, H1F0, IKBKAP, MAGI2, KIF5B, TFPT, CRYAA, RCOR1, PIK3CD, KIF5C, ANKS3, LIFR, BTBD7, MYH4, MED13, NCAPD3, ST13, MED19, ADAMTS8, EIF2AK1, DHX29, EIF2S1, EIF2S2, ZNHIT1, PPP2R5E, RPS10, FCHSD1, UNC13C, IL1R2, RAD23B, SDAD1, TNRC18, NFKBIE, …	1223	6311	17854	1.48738	7.11344e-35	7.11344e-35	2.27296e-34
SP_PIR_KEYWORDS	nucleus	413	26.4913	8.66656e-26	MEF2A, PPP2R5C, XRCC6, NAA15, RORB, INTS3, SART3, MED20, AI314180, INTS8, MAMSTR, TLK1, DHX36, LUC7L3, H1F0, IKBKAP, TFPT, SRP54A, RXRA, SRP54B, RCOR1, SRP54C, MED13, TOX2, NCAPD3, MED19, AQR, SMARCAL1, RAD23B, SDAD1, SFRS18, NAT10, CCDC89, PRPF40A, ASXL2, DNMT3A, ZC3H15, KLF12, ASXL1, PKP3, TRPS1, PPRC1, SMURF2, BACH1, ZFP385B, ELF1, ELF2, TAF1D, EZH1, RLIM, HSF2, BRD4, BRD8, SRPK2, EXOSC4, GMEB…	1223	3808	17854	1.5833	3.83929e-23	1.91964e-23	1.22677e-22
SP_PIR_KEYWORDS	alternative splicing	446	28.6081	2.52014e-20	MEF2A, VPS54, PPP2R5C, RORB, VPRBP, INTS3, ITSN2, SART3, MED20, ACBD5, AI314180, MAMSTR, WDR76, LUC7L2, LUC7L3, MAGI2, CRYAA, TFPT, SRP54A, SRP54B, SRP54C, LIFR, BTBD7, PTPDC1, CD320, SMARCAL1, TFPI, FCHSD1, SDAD1, TNRC18, CACNB4, DAAM1, SDHAF2, PDSS2, KCNJ1, LPCAT1, PVRL3, RCCD1, CKLF, SPERT, 6030446N20RIK, PRPF40A, ZC3H15, IGH-6, SFMBT2, PKP3, PPRC1, SMURF2, A830010M20RIK, ZFP385B, ELF2, TAF1D,…	1223	4481	17854	1.45301	1.11642e-17	3.7214e-18	3.5673e-17
SP_PIR_KEYWORDS	acetylation	250	16.0359	6.21356e-14	SYT1, MEF2A, FASTKD1, PNMA2, VAPA, S100A9, PITPNB, XRCC6, NAA15, STOML2, 1110028C15RIK, AURKB, CCT3, PRKG1, SART3, SIN3A, LUC7L2, DHX36, LUC7L3, KIF5B, CRYAA, SRP54A, SRP54B, SRP54C, CYP1A2, DCTN4, 2310035C23RIK, AQR, GAPVD1, RFC1, BAZ1B, SERBP1, EIF2S1, VEGFA, EIF2S2, RAB14, YME1L1, ADD2, ADD1, RAD23B, DUSP12, SPNB2, STX17, NAT10, SUPV3L1, BCOR, MEPCE, HNRNPAB, PRPF40A, ASPSCR1, IKZF2, OSBPL9, C…	1223	2325	17854	1.56973	2.75424e-11	6.8856e-12	8.80074e-11
SP_PIR_KEYWORDS	transcription regulation	173	11.0969	5.45029e-11	MEF2A, NAA15, HIRA, BBX, RORB, PDX1, MED20, CNOT4, PNN, TAF7L, ESF1, ZFP784, ZFP91, MAMSTR, MLL5, SIN3A, ZFP93, SMARCD2, TGS1, MLL3, GABPB2, MYST3, IKBKAP, RCOR1, RXRA, SIX2, ZFP629, MED13, PPARGC1A, PPARGC1B, SLTM, MED19, PA2G4, RBPMS, TIMELESS, KDM2A, MTF1, RFC1, BAZ1B, ZFP263, MGA, DNTTIP2, XRN2, SUV420H1, GPBP1L1, SOX5, SOX4, ELK1, SOX9, NR2C2, MED12L, ZC3H8, ZFP451, TEF, PBRM1, SUPT7L, BCOR,…	1223	1546	17854	1.6336	2.41448e-08	4.82896e-09	7.715e-08
SP_PIR_KEYWORDS	Transcription	191	12.2514	9.48655e-11	MEF2A, NAA15, HIRA, BBX, RORB, PDX1, MED20, CNOT4, PNN, TAF7L, ESF1, ZFP784, ZFP91, MAMSTR, MLL5, SIN3A, ZFP93, SMARCD2, TGS1, ZFP882, MLL3, GABPB2, MYST3, IKBKAP, RXRA, RCOR1, ZFP629, MED13, PPARGC1A, PPARGC1B, SLTM, MED19, PA2G4, RBPMS, KDM2A, MTF1, TIMELESS, RFC1, BAZ1B, ZFP263, MGA, DNTTIP2, XRN2, SUV420H1, GPBP1L1, SOX5, SOX4, ELK1, ZFP458, SOX9, NR2C2, MED12L, ZC3H8, ZFP454, ZFP451, 6330416…	1223	1769	17854	1.57621	4.20254e-08	7.00423e-09	1.34284e-07
SP_PIR_KEYWORDS	coiled coil	185	11.8666	4.8629e-10	MTSS1, ENAH, DZIP3, VAPA, CHMP5, PLXNA2, VPS54, ADCY5, DZIP1, RNF216, ITSN2, PRKG1, SART3, LZTFL1, ACBD5, CEP70, HOOK3, CNOT4, PNN, TAF7L, KIF13A, ESF1, N4BP2L2, ACBD3, MLL5, CHIC1, TIAM2, COL4A3BP, SRRM2, LUC7L2, TLK1, DHX36, GLE1, MLL3, LUC7L3, GABPB2, OPA3, KIF5B, FAM82A1, RCOR1, RINT1, KIF5C, ANKS3, MYH4, PSD4, NAV3, STK4, DCTN4, VTI1A, NCAPD3, STK3, SLTM, 2310035C23RIK, DHX29, BAZ1B, ACAP2, …	1223	1732	17854	1.55931	2.15427e-07	3.07752e-08	6.88353e-07
SP_PIR_KEYWORDS	ubl conjugation	70	4.49006	1.13462e-07	ABCF1, KIF22, MEF2A, HIRA, RNF216, VPRBP, CNOT4, FUBP1, TOP1, CUL5, SPRED2, HIST3H2A, ACIN1, RANBP2, PSMD7, KPNB1, WWOX, SCN10A, EGFR, RBBP4, USP1, RXRA, ENC1, ESR1, MYH4, GAN, NKTR, JMY, CCND1, HIST2H2BE, SH3KBP1, BUB1B, GNAS, PCYOX1, EPN2, USP7, DCC, XIAP, TNRC18, ELK1, CHEK1, GON4L, TCF7L2, CHD8, N4BP1, SUPT7L, TRAF6, RBM25, PIK3R1, APC, STAMBP, SETDB1, DNMT3A, AIMP2, CREBBP, ATAD1, BAT2L, RNF…	1223	524	17854	1.95019	5.02622e-05	6.28291e-06	0.000160607
SP_PIR_KEYWORDS	bromodomain	14	0.898012	1.62237e-07	BRD1, ZMYND11, BRD2, BRD3, CREBBP, PHIP, BRWD1, BAZ1B, BPTF, PBRM1, BRD4, BAZ2B, BAZ2A, BRD8	1223	34	17854	6.01116	7.18685e-05	7.98564e-06	0.000229649
SP_PIR_KEYWORDS	cytoplasm	274	17.5754	3.22647e-07	LDHC, DZIP3, CHMP5, DZIP1, PITPNB, S100A9, NAA15, STOML2, RNF216, VPRBP, AURKB, CCT3, ITSN2, SART3, AI314180, HOOK3, TAF7L, ZFP91, COL4A3BP, GLE1, CYHR1, WWOX, IKBKAP, KIF5B, SRP54A, SRP54B, RINT1, SRP54C, WNK1, MYH4, DCTN4, ST13, DHX29, SERBP1, CAMK1, RPS10, PPP2R5E, PDE4DIP, 6530401N04RIK, UNC13C, EIF2C3, ADD2, ADD1, CHKA, TDRD3, RAD23B, CDK5R1, NFKBIE, RABEPK, CHEK1, DAAM1, NAA35, GAD2, NPHP4,…	1223	3029	17854	1.32057	0.000142922	1.42932e-05	0.000456712
SP_PIR_KEYWORDS	zinc-finger	125	8.01796	2.27105e-06	DZIP3, DZIP1, RBM4, RBM5, RNF216, RORB, CNOT4, ZFP784, ZFP91, MLL5, RNF141, ZFP93, RNF38, RC3H2, LUC7L2, MLL3, CYHR1, RNF32, MYST3, NEIL3, RXRA, ZFP629, RPH3A, RNF130, KDM2A, MTF1, BAZ1B, MLLT10, ACAP2, EIF2S2, ZNHIT1, UNC13C, ANKFY1, RNF20, XRN2, FUS, ZFAND5, ZFAND3, ZC3H4, NR2C2, TTC3, ZC3H8, ZFP451, RNF166, RNF168, TRAF6, DNAJA2, RNF13, ASXL2, DNMT3A, IKZF2, ZC3H15, TRIP4, KLF12, CREBBP, ZMYM5…	1223	1204	17854	1.51563	0.00100557	9.14573e-05	0.00321467
SP_PIR_KEYWORDS	chromatin regulator	33	2.11674	2.40112e-06	UTY, EZH1, HIRA, CHD8, MLL5, SMARCD2, PBRM1, TLK1, RNF168, MLL3, BCOR, KDM5A, BAZ2A, MYSM1, CHD4, KDM5C, BRD8, MYST3, SETDB1, TBL1XR1, DNMT3A, BRCC3, RBBP4, RCOR1, EYA3, EYA4, KDM2A, SMARCC1, SETD8, KDM4A, NCOR1, RNF20, SUV420H1	1223	192	17854	2.50912	0.00106313	8.86374e-05	0.00339877
SP_PIR_KEYWORDS	zinc	180	11.5459	2.5344e-06	ALPPL2, DZIP3, DZIP1, S100A9, RBM4, RBM5, RNF216, RORB, MOBKL2C, CNOT4, ZFP784, ZFP91, MLL5, ZFP93, RNF141, RNF38, RC3H2, C330005M16RIK, LUC7L2, ZFP882, MLL3, CYHR1, RNF32, MYST3, NEIL3, RXRA, ZFP629, RPH3A, TNS3, RNF130, ADAMTS8, KDM2A, MTF1, BAZ1B, MLLT10, ACAP2, EIF2S2, ZFP263, ZNHIT1, YME1L1, CPD, UNC13C, ANKFY1, RNF20, XRN2, FUS, ZFAND5, ZFAND3, ZC3H4, AKAP13, DUSP12, ZFP458, TTC3, NR2C2, ZC…	1223	1886	17854	1.39328	0.00112211	8.63609e-05	0.00358743
SP_PIR_KEYWORDS	dna-binding	141	9.04426	2.88062e-06	MEF2A, XRCC6, BBX, INO80, RORB, PDX1, PNN, ZFP784, ZFP91, TOP1, ZFP93, SRRM1, RC3H2, MLL3, LUC7L3, H1F0, NEIL3, RXRA, SIX2, ZFP629, TOX2, RFC1, KDM2A, MTF1, MGA, FUS, HMGB4, GPBP1L1, SOX5, SOX4, ELK1, SOX9, NR2C2, ZFP451, TEF, PBRM1, RAD51L3, LHX9, TCF25, HNRNPAB, DNMT3A, IKZF2, KLF12, SMG6, GSX1, ZFP97, ZFP445, TET1, ZBTB43, SAFB2, ATF4, HOXB2, CSRNP3, ZFP770, DMTF1, TRPS1, ZFP143, EBF1, HIST1H3…	1223	1404	17854	1.46609	0.0012753	9.1147e-05	0.00407749
SP_PIR_KEYWORDS	activator	61	3.91276	5.47759e-06	BACH1, MEF2A, ELF1, ELF2, RORB, PDX1, MED20, PNN, MAMSTR, HSF2, MKL2, MLL3, MYST3, TBL1XR1, CCNC, MED13, PPARGC1A, PPARGC1B, MED19, EYA3, EYA4, SS18, RBPMS, BRWD1, MTF1, RFC1, RBM39, CLOCK, MED1, SOX5, SOX4, ELK1, TCF7L2, MED12L, CHD8, TEF, CEBPZ, POU3F2, ETV4, MYSM1, IKZF2, CREBBP, GSX1, AFF3, CREB5, ATF4, NOTCH1, CSRNP3, UBTF, DMTF1, SFPQ, NOTCH4, SP4, THRAP3, EBF1, ZFP143, PPRC1, PBX1, IRF3, R…	1223	484	17854	1.8399	0.00242364	0.000161759	0.00775335
SP_PIR_KEYWORDS	DNA damage	32	2.0526	8.3576e-06	RAD23B, XRCC6, CHEK1, RRM2B, INTS3, PMS2, TLK1, RNF168, RAD51L3, CCNO, FANCC, BRCC3, RAD51AP1, NEIL3, USP1, SMG1, CEP63, UBE2B, JMY, ATRX, EYA3, EYA4, XPA, BAZ1B, TIMELESS, RIF1, SFPQ, SUPT16H, TDG, SMC1A, ALKBH2, REV3L	1223	194	17854	2.408	0.00369558	0.000231375	0.0118297
SP_PIR_KEYWORDS	repressor	51	3.27133	1.42204e-05	BACH1, EZH1, HIRA, PCGF3, SIN3A, MYST3, TBL1XR1, RBBP4, RCOR1, SCAI, CCNC, MED13, SLTM, PA2G4, KDM2A, NAB2, MGA, CUX1, SUV420H1, ZMYND11, BCLAF1, ZFP318, TCF7L2, ZC3H8, MED12L, TSC22D1, MSX3, CHD8, GATAD2B, HBP1, BCOR, BAZ2A, TCF25, HNRNPAB, ASXL2, SETDB1, DNMT3A, ZBTB7A, ERF, NACC1, KLF12, ASXL1, SAP30BP, SAFB2, PHB2, TRPS1, SFPQ, SETD8, RBPJ, NCOR1, KLF3	1223	391	17854	1.90416	0.00627989	0.000370501	0.0201274
SP_PIR_KEYWORDS	chromosomal protein	25	1.60359	1.5972e-05	HMGB4, XRCC6, AURKB, CENPA, HJURP, HIST3H2A, RNF168, H1F0, SETDB1, CENPO, SP100, CENPL, SMG6, CENPP, HMGA2, HIST1H1T, RIF1, HIST2H2BE, SUPT16H, HIST1H3B, SETD8, TMPO, RNF20, HIST1H3H, SUV420H1	1223	136	17854	2.68355	0.00705068	0.000393015	0.0226063
SP_PIR_KEYWORDS	metal-binding	236	15.1379	2.01873e-05	SYT1, ALPPL2, DZIP3, DZIP1, ADCY5, RNF216, RORB, AURKB, MAP3K7, ATP2B2, ZFP91, ZFP93, LUC7L2, CYHR1, RXRA, ZFP629, CYP1A2, ADAMTS8, MTF1, BAZ1B, MLLT10, ACAP2, EIF2S2, ZNHIT1, YME1L1, UNC13C, PLA2G2E, FUS, NEK1, AKAP13, DUSP12, ZFP458, ZFP454, ZFP451, LHX9, ASXL2, ZC3H13, DNMT3A, IKZF2, ZC3H15, KLF12, ANKMY2, CREBBP, ASXL1, ZFP97, ZFP449, ZFP445, ZFP606, PPA2, ZBTB43, NOTCH1, ADAP2, TRPS1, BCL6B,…	1223	2682	17854	1.28458	0.00890319	0.000470577	0.0285717
SP_PIR_KEYWORDS	rna-binding	55	3.5279	0.000280263	DZIP3, CPEB3, CPEB4, DICER1, RBM4, RBM5, TLR3, SART3, CNOT4, ANKRD17, RBM4B, TIA1, SRRM1, PIWIL2, PUM2, SRP54A, EXOSC4, SRP54B, SNUPN, SRP54C, MBNL1, PPARGC1A, PPARGC1B, EIF4G1, SLTM, RBPMS, PA2G4, AQR, EIF2S1, PABPN1L, SERBP1, CPSF6, RBM39, THOC2, EIF2C3, FUS, HDLBP, 0610009D07RIK, TRA2B, ZC3H8, DDX46, RPL7, BAZ2A, RBM25, HNRNPAB, RBM26, GEMIN5, RAD51AP1, ILF3, SAFB2, SLBP, DDX6, SON, SFPQ, PPRC…	1223	485	17854	1.6555	0.116774	0.00618947	0.395988
SP_PIR_KEYWORDS	dna repair	26	1.66774	0.000308696	RAD23B, XRCC6, CHEK1, RRM2B, INTS3, PMS2, RNF168, RAD51L3, CCNO, FANCC, BRCC3, RAD51AP1, USP1, SMG1, UBE2B, JMY, EYA3, ATRX, XPA, EYA4, SFPQ, TDG, SUPT16H, SMC1A, ALKBH2, REV3L	1223	173	17854	2.194	0.127832	0.00649185	0.436079
SP_PIR_KEYWORDS	isopeptide bond	36	2.30917	0.000330679	ABCF1, MEF2A, TNRC18, ELK1, GON4L, CHEK1, VPRBP, TCF7L2, TOP1, CUL5, CHD8, HIST3H2A, ACIN1, RANBP2, TRAF6, PSMD7, KPNB1, RBM25, SETDB1, EGFR, RBBP4, RXRA, CREBBP, MYH4, NKTR, ATAD1, BAT2L, HIST2H2BE, RPS6KA2, TRPS1, HIST1H3B, TDG, GNAS, PCYOX1, CALM1, KLF3	1223	277	17854	1.89728	0.136287	0.00663765	0.467066
SP_PIR_KEYWORDS	atp-binding	120	7.69724	0.000401756	D5ERTD579E, PRPF4B, ADCY5, XRCC6, INO80, RPS6KB1, AURKB, CCT3, PRKG1, C230081A13RIK, MAP3K7, KIF13A, ATP2B2, TOP1, CSNK2A1, MOS, PIK3CA, DHX36, TLK1, PRKACB, KIF13B, EGFR, NMNAT3, KIF5B, KIF5C, PIK3CD, WNK1, MYH4, STK4, STK3, EIF2AK1, DHX29, RFC1, BAZ1B, RIOK3, ASCC3, ATP9B, SMARCAL1, CAMK1, YME1L1, CHKA, GNE, STK11, NEK1, BMPR2, STK17B, CHEK1, KCNJ1, IRAK4, QRSL1, DDX46, NAT10, SUPV3L1, RAD51L3,…	1223	1287	17854	1.36117	0.163069	0.00770985	0.567193
SP_PIR_KEYWORDS	ubl conjugation pathway	54	3.46376	0.000472608	DZIP3, RNF216, VPRBP, CDC16, RLIM, SENP7, CNOT4, ZYG11B, DCAF12, CUL5, WWP2, RANBP2, DCAF17, TBL1XR1, BRCC3, USP1, ENC1, SOCS6, GAN, UBE2H, HERC2, HERC1, UBE2B, DCUN1D2, KDM2A, ANAPC7, RNF20, ASB7, USP7, OTUD5, ZFAND5, RAD23B, USP8, XIAP, UBE3A, CBLL1, FEM1A, USP37, FBXW2, USP36, RNF168, FBXO3, TRAF6, TRIP12, MYSM1, STAMBP, HACE1, UBE2L3, RNF43, TULP4, NEDD4, SMURF2, USP48, USP45	1223	484	17854	1.62876	0.188941	0.00868766	0.66691
SP_PIR_KEYWORDS	Initiation factor	12	0.769724	0.0010812	EIF3C, EIF4G1, EIF2AK1, DHX29, EIF2S1, EIF3E, EIF2S2, EIF5, EIF3L, EIF3J, EIF2C3, EIF4E2	1223	55	17854	3.18513	0.380741	0.0189867	1.51963
SP_PIR_KEYWORDS	protein transport	50	3.20718	0.00145286	COPA, CHMP5, VPS54, VPS33A, HOOK3, KIF13A, RANBP3, VPS13A, RAB6B, VPS13B, GLE1, RANBP2, KPNB1, ZW10, NUP133, RAB39B, RINT1, STXBP1, IPO8, RPH3A, VTI1A, RAB14, KPNA2, KPNA1, SNAP29, SDAD1, NAPG, STAM2, NUP93, NUP214, MIA3, NUP210, SEC22A, VPS35, SEC22C, APPBP2, DOPEY1, TNPO1, FAM125B, RAB2B, MYO1C, SNX27, TOMM40, DNHD1, LIN7A, SCFD1, COG5, ARF3, TOMM40L, XPO7	1223	461	17854	1.58335	0.474857	0.0244682	2.03701
SP_PIR_KEYWORDS	kinase	70	4.49006	0.00178069	PRPF4B, PPIP5K1, RPS6KB1, AURKB, PRKG1, MOBKL2C, C230081A13RIK, INSRR, MAP3K7, CSNK2A1, TSKS, MOS, CDK12, PIK3CA, TLK1, PRKACB, PRKCA, EGFR, SRPK2, MADD, PIK3CD, WNK1, STK4, STK3, PANK4, BC021891, MAST4, PANK2, ACVR2B, EIF2AK1, BAZ1B, HIPK1, RIOK3, SH3KBP1, CAMK1, BUB1B, AKAP4, CHKA, CDK5R1, GNE, STK11, NEK1, HK2, STK17B, BMPR2, AKAP13, CHEK1, AKAP9, IRAK4, MAP3K2, PALM2, ETNK1, PRKAA2, UCK2, DCL…	1223	707	17854	1.4454	0.54595	0.0288191	2.49129
SP_PIR_KEYWORDS	nucleotide-binding	142	9.1084	0.00201987	GNA13, D5ERTD579E, PRPF4B, ADCY5, XRCC6, EIF5, INO80, RPS6KB1, AURKB, CCT3, PRKG1, C230081A13RIK, KIF13A, MAP3K7, ATP2B2, TOP1, CSNK2A1, MOS, PIK3CA, RALA, TLK1, DHX36, PRKACB, KIF13B, EGFR, NMNAT3, NUDT2, KIF5B, SRP54A, SRP54B, SRP54C, KIF5C, PIK3CD, WNK1, MYH4, STK4, STK3, EIF2AK1, RFC1, DHX29, BAZ1B, RIOK3, ATP9B, SMARCAL1, RAB14, CAMK1, YME1L1, CHKA, GNE, STK11, GNAI1, NEK1, BMPR2, STK17B, RR…	1223	1631	17854	1.27099	0.591681	0.0314833	2.82148
SP_PIR_KEYWORDS	Chaperone	21	1.34702	0.00313713	HSP90AB1, GRPEL2, HSP90AA1, DNAJB14, CCT3, ST13, BAG4, DNAJB7, PFDN1, CCT5, PSMG2, CCT4, HJURP, BAG3, HSPA4L, TOR1B, DNAJC6, HSPE1, DNAJC5, HSPD1, DNAJA2	1223	150	17854	2.04379	0.751406	0.0468641	4.35019
SP_PIR_KEYWORDS	cytoskeleton	58	3.72033	0.00412604	MTSS1, ENAH, S100A9, STOML2, AURKB, TTLL1, CEP70, TTLL3, HOOK3, AI314180, DCAF12, ANK2, ACTR1A, MTAP9, ZW10, TWF1, KIF5B, FAM82A1, CEP110, ENC1, GAN, FLNB, DCTN4, JMY, TTLL10, KIF1B, RIF1, SH3KBP1, CLIP1, PDE4DIP, MAPRE1, DST, ADD2, ADD1, HAUS4, BBS4, PARD3, RDX, CHEK1, NPHP4, SPNB2, TUBE1, CLASP1, ODF2, PAFAH1B1, CLASP2, APPBP2, PLEC, DNM3, ITGA4, CEP63, EPB4.1L2, ACTRT1, MYO15, TMOD2, TMOD3, AB…	1223	583	17854	1.45234	0.839846	0.0592275	5.6846
SP_PIR_KEYWORDS	nuclear pore complex	8	0.513149	0.00424645	NUP133, NUP214, MYO1C, NUP210, NUP93, GLE1, RANBP2, XPO7	1223	31	17854	3.76736	0.848199	0.0590002	5.84589
SP_PIR_KEYWORDS	microtubule	27	1.73188	0.00485241	HAUS4, KIF22, TUBA3A, TTLL1, HOOK3, TTLL3, KIF13A, TEKT3, MTAP9, TUBE1, ODF2, CLASP1, PAFAH1B1, APPBP2, MTAP7, CLASP2, KIF13B, DNM3, FAM82A1, KIF5B, KIF5C, DYNLT3, TTLL10, KIF1B, MTAP1B, CLIP1, MAPRE1	1223	221	17854	1.78353	0.884079	0.0651218	6.6537
SP_PIR_KEYWORDS	ank repeat	27	1.73188	0.00514898	NFKBIE, FEM1A, ANKRD36, ANKRD52, ANKRD17, ANK2, ANK3, ANKRD11, PPP1R12A, TNKS, BCOR, GABPB2, ANKMY2, ANKS3, HACE1, ANKHD1, TNKS2, ANKRD45, ANKRD26, ANKRD44, ANKRD13C, NOTCH1, ZDHHC13, ACAP2, NOTCH4, ANKFY1, ASB7	1223	222	17854	1.7755	0.898418	0.0669531	7.04671
SP_PIR_KEYWORDS	s-adenosyl-l-methionine	14	0.898012	0.00670074	SETDB1, DNMT3A, EZH1, RSAD1, CDKAL1, MLL5, MTR, SETD8, MLL3, AMD1, NSUN3, METTL11A, MEPCE, SUV420H1	1223	88	17854	2.32249	0.949127	0.0838732	9.07811
SP_PIR_KEYWORDS	Apoptosis	36	2.30917	0.00911722	DCC, MEF2A, XIAP, RBM5, STK17B, RRAGA, RNF216, PTEN, PDCD1, ZC3H8, PRUNE2, BAG3, TIA1, TRP53INP1, ACIN1, RBM25, WWOX, PDCD10, TM2D1, MADD, AIMP2, SAP30BP, STK4, STK3, TAX1BP1, SLTM, RNF130, TNFSF10, CSRNP3, P2RX1, BNIP2, SULF1, SH3KBP1, NAIF1, BUB1B, PSME3	1223	337	17854	1.55949	0.982707	0.10946	12.1595
SP_PIR_KEYWORDS	molecular chaperone	5	0.320718	0.0125531	CCT5, CCT4, HSPE1, HSPD1, CCT3	1223	14	17854	5.21376	0.996288	0.14397	16.374
SP_PIR_KEYWORDS	mrna processing	27	1.73188	0.0136402	PRPF4B, 0610009D07RIK, TRA2B, RBM4, RBM5, WBP11, PNN, RBM4B, TCP11, DDX46, CNOT6L, SRRM2, SRRM1, RBM25, LUC7L3, PRPF40A, GEMIN5, SRPK2, SLBP, AQR, SFPQ, LSM11, CPSF6, RBM39, THOC2, XRN2, PRPF38B	1223	240	17854	1.64233	0.997721	0.15163	17.6679
SP_PIR_KEYWORDS	tpr repeat	18	1.15459	0.0161183	BBS4, UTY, TTC30A1, NAA15, NAA16, CDC16, 9130404D08RIK, FEM1A, CEP70, CTR9, ST13, INTS8, P4HA1, VPS13A, TMTC3, ANAPC7, RANBP2, APPBP2	1223	141	17854	1.86364	0.999252	0.172574	20.5479
SP_PIR_KEYWORDS	methyltransferase	18	1.15459	0.0171836	SETDB1, DNMT3A, HIGD1C, EZH1, N6AMT1, GM10035, MLL5, METTL2, TRMT6, MTR, SETD8, METTL7A1, MLL3, NSUN3, TGS1, METTL7A2, METTL11A, MEPCE, SUV420H1	1223	142	17854	1.85052	0.999537	0.178715	21.7571
SP_PIR_KEYWORDS	centromere	8	0.513149	0.0176354	CENPO, CENPL, CENPA, HJURP, CENPP, PPP2R5C, AURKB, CBX5	1223	40	17854	2.91971	0.999623	0.178854	22.2646
SP_PIR_KEYWORDS	mitosis	21	1.34702	0.0208232	HAUS4, CKAP5, NEK1, AURKB, CDC16, CEP63, HMGA2, 9130404D08RIK, NCAPD3, MIS12, TIMELESS, MTAP9, BUB1B, SETD8, PAFAH1B1, CLASP1, MAPRE1, CLASP2, ANAPC7, SMC1A, ZW10	1223	179	17854	1.71268	0.999911	0.203372	25.76
SP_PIR_KEYWORDS	dioxygenase	11	0.705581	0.0222078	HIF1AN, KDM2A, P4HA1, ALOX12E, UTY, KDM4A, KDM5A, ALKBH2, TET1, BCO2, KDM5C	1223	71	17854	2.26174	0.999952	0.210913	27.2323
SP_PIR_KEYWORDS	proteasome	9	0.577293	0.0295377	RAD23B, PSMB1, PSMD11, UBE3A, PSME3, PSME4, PSMD6, PSMD7, AI314180	1223	54	17854	2.43309	0.999998	0.26574	34.5845
SP_PIR_KEYWORDS	serine/threonine-protein kinase	37	2.37332	0.0342282	PRPF4B, STK11, NEK1, STK17B, BMPR2, CHEK1, RPS6KB1, AURKB, PRKG1, MAP3K7, IRAK4, CSNK2A1, MAP3K2, CDK12, MOS, TLK1, PRKACB, PRKAA2, DCLK1, PRKCA, SRPK2, TAOK1, TAOK3, WNK1, SMG1, STK4, STK3, MAST4, BC021891, ACVR2B, EIF2AK1, HIPK1, RPS6KA2, RIOK3, MAPK14, CAMK1, BUB1B	1223	384	17854	1.40663	1	0.295771	38.9204
SP_PIR_KEYWORDS	helicase	15	0.962155	0.0348548	DICER1, XRCC6, INO80, DDX6, ATRX, CHD8, DDX46, DHX29, ASCC3, HELB, SMARCAL1, DHX36, SUPV3L1, CHD6, CHD4	1223	120	17854	1.82482	1	0.294782	39.4789
SP_PIR_KEYWORDS	mrna splicing	21	1.34702	0.0380977	SRPK2, PRPF4B, 0610009D07RIK, TRA2B, RBM4, RBM5, WBP11, PNN, RBM4B, AQR, DDX46, SRRM2, SFPQ, SRRM1, RBM39, THOC2, RBM25, LUC7L3, PRPF38B, PRPF40A, GEMIN5	1223	191	17854	1.60507	1	0.312071	42.2947
SP_PIR_KEYWORDS	er-golgi transport	11	0.705581	0.0426175	RAB2B, COPA, SCFD1, MIA3, NAPG, ARF3, RINT1, SEC22A, SEC22C, RAB6B, ZW10	1223	79	17854	2.03271	1	0.336684	46.0164
SP_PIR_KEYWORDS	methylation	23	1.4753	0.0494694	FUS, RAP2B, CRYAA, MYO1C, RAB39B, TRA2B, S100A9, CREBBP, MYH4, ILF3, HIST2H2BE, SFPQ, THRAP3, RAB14, HIST1H3B, RALA, PIWIL2, RAB6B, HIST3H2A, CRYBA1, HIST1H3H, CALM1, HNRNPAB	1223	221	17854	1.5193	1	0.373898	51.2353
SP_PIR_KEYWORDS	mRNA transport	9	0.577293	0.0508954	NUP133, NUP214, MYO1C, NUP210, NUP93, GLE1, RANBP2, THOC2, XPO7	1223	60	17854	2.18978	1	0.376408	52.2607
SP_PIR_KEYWORDS	protein biosynthesis	16	1.0263	0.0532563	AIMP2, EIF5, EIF3C, EIF4G1, QRSL1, RPL7, DHX29, PARS2, NARS2, EIF3E, EIF2S1, EIF2S2, SEPSECS, EIF3L, EIF3J, EIF4E2	1223	139	17854	1.68041	1	0.384229	53.9144
SP_PIR_KEYWORDS	protein phosphatase	14	0.898012	0.0668447	PTPRA, STYX, DUSP12, PTPDC1, PTEN, PTPN11, EYA3, EYA4, MTMR3, PPM1D, DUSP3, DNAJC6, PPM1L, CTDP1	1223	120	17854	1.70316	1	0.451708	62.4429
SP_PIR_KEYWORDS	Synaptosome	6	0.384862	0.0717474	SNAP29, MAGI2, SH3KBP1, RPS6KB1, VAMP2, LIN7A	1223	33	17854	2.65428	1	0.469677	65.1415
SP_PIR_KEYWORDS	translocation	9	0.577293	0.0748193	NUP133, NUP214, MYO1C, NUP210, NUP93, DNHD1, GLE1, RANBP2, XPO7	1223	65	17854	2.02133	1	0.477958	66.7393
SP_PIR_KEYWORDS	ligase	27	1.73188	0.0962124	DZIP3, XIAP, UBE3A, HLCS, RNF216, CBLL1, RLIM, TTLL13, TTLL1, CNOT4, TTLL3, QRSL1, WWP2, PARS2, NARS2, RNF168, TRAF6, HACE1, HERC2, UBE2H, UBE2L3, UBE2B, RNF43, TTLL10, NEDD4, SMURF2, RNF20	1223	290	17854	1.35917	1	0.563905	76.1158
UP_SEQ_FEATURE	splice variant	442	28.3515	1.25947e-15	MEF2A, VPS54, PPP2R5C, RORB, VPRBP, INTS3, ITSN2, SART3, MED20, ACBD5, AI314180, MAMSTR, WDR76, LUC7L2, LUC7L3, MAGI2, CRYAA, TFPT, SRP54A, SRP54B, SRP54C, LIFR, BTBD7, PTPDC1, CD320, SMARCAL1, TFPI, FCHSD1, SDAD1, TNRC18, CACNB4, DAAM1, SDHAF2, PDSS2, LPCAT1, PVRL3, RCCD1, CKLF, SPERT, 6030446N20RIK, PRPF40A, DNMT3A, ZC3H15, SFMBT2, PKP3, PPRC1, SMURF2, A830010M20RIK, ZFP385B, ELF2, TAF1D, EZH1,…	1157	4448	16021	1.37599	3.5868e-12	3.5868e-12	2.19824e-12
UP_SEQ_FEATURE	compositionally biased region:Lys-rich	28	1.79602	2.57396e-09	SYT1, PARD3, BBX, ESF1, PHIP, TOP1, FAM133B, SRRM2, REXO1, SRRM1, NAT10, BRD4, PLCB1, FAM32A, KDM5A, TGS1, BAZ2A, CHD4, MYST3, TAF2, BRD3, NUCKS1, CCDC50, MED19, PHF2, BAZ1B, NOP58, MED1	1157	103	16021	3.76424	7.55968e-06	3.77985e-06	4.6239e-06
UP_SEQ_FEATURE	compositionally biased region:Ser-rich	59	3.78448	4.07354e-08	MTSS1, D5ERTD579E, ARID4B, RLIM, PNN, ANKRD17, CHIC1, FAM133B, ANK2, TIAM2, SRRM2, CDK12, SRRM1, PUM2, BRD4, GLE1, ACIN1, MYST3, EGFR, MADD, MED13, NAV3, PPARGC1B, ZCCHC14, MYT1L, BRWD1, 1700020L24RIK, D930015E06RIK, MGA, CLIP1, MED1, TNRC18, NUFIP2, TSC22D1, SFRS18, CHD8, REXO1, PPP1R12A, CLASP1, HBP1, CLASP2, APC, ASXL2, BRD2, BRD3, AFF3, DOCK4, BAT2L, CTR9, 4933411K20RIK, RNF43, MICALCL, ATXN2…	1157	380	16021	2.14993	0.000119633	3.98792e-05	7.31778e-05
UP_SEQ_FEATURE	compositionally biased region:Gln-rich	28	1.79602	2.48264e-07	USP7, RBM33, TNRC18, CPEB3, FAM63B, MED12L, PNN, TSC22D1, PHC3, ACBD3, SFRS18, ANKRD17, CHD8, PALM2, MKL2, BRD4, BAT2L2, PUM2, MLL3, ETV4, MYST3, BAT2L, SS18, WDR47, PAXIP1, MLLT10, GIGYF2, CLOCK	1157	126	16021	3.07712	0.000728886	0.000182271	0.000445985
UP_SEQ_FEATURE	compositionally biased region:Arg/Ser-rich	6	0.384862	9.03076e-05	RSRC1, LUC7L2, LUC7L, PPARGC1A, NKTR, LUC7L3	1157	8	16021	10.3853	0.232982	0.0516666	0.162106
UP_SEQ_FEATURE	compositionally biased region:Poly-Glu	48	3.0789	0.000154934	MEF2A, PNMA2, DZIP3, BBX, NAA16, GON4L, 9430020K01RIK, C230081A13RIK, PHIP, EIF3C, ATP2B2, ACBD3, MIA3, CHIC1, DDX46, TRP53INP1, RANBP2, DCAF17, BAZ2A, GABPB2, MYST3, CNKSR2, WDFY3, SNAPC5, BRD2, BRD3, TAOK1, HTT, CCNH, CREBBP, TAOK3, MRGPRB1, STK4, PPARGC1B, STK3, CTR9, HEATR6, ATRX, XPA, PAXIP1, TTLL10, DHX29, SP4, SUPT16H, BUB1B, LRCH3, KPNA2, CTDP1	1157	376	16021	1.7677	0.3656	0.073041	0.27796
UP_SEQ_FEATURE	domain:Bromo 2	6	0.384862	0.000191089	PHIP, BRWD1, BRD2, BRD3, PBRM1, BRD4	1157	9	16021	9.23135	0.429522	0.0770526	0.342719
UP_SEQ_FEATURE	domain:Bromo 1	6	0.384862	0.000191089	PHIP, BRWD1, BRD2, BRD3, PBRM1, BRD4	1157	9	16021	9.23135	0.429522	0.0770526	0.342719
UP_SEQ_FEATURE	repeat:HEAT 3	11	0.705581	0.000523547	HEATR6, 2310035C23RIK, CKAP5, HTT, CLASP1, PSME4, CLASP2, KPNB1, TNPO1, NCAPD3, AI314180	1157	41	16021	3.71505	0.785203	0.174906	0.936344
UP_SEQ_FEATURE	compositionally biased region:Arg-rich	17	1.09044	0.000649362	ARGLU1, RBM5, MBD2, SAFB2, PNN, ACBD3, DDX46, SRRM2, THRAP3, PPRC1, CPSF6, SRRM1, BAT2L2, GIGYF2, RBM25, PRPF38B, RBM26	1157	90	16021	2.61555	0.851593	0.191017	1.16012
UP_SEQ_FEATURE	compositionally biased region:Poly-Lys	23	1.4753	0.00070718	PCDHA6, PCDHA7, SBNO1, PCDHA9, DZIP3, PCDHA2, FAM193A, PCDHA4, PCDHA5, HIRA, BBX, WBP11, GON4L, PCDHA1, PCDHAC2, PCDHAC1, PCDHA10, PCDHA11, PCDHA12, GEMIN5, TAF2, NLRP6, BRD2, RALBP1, CEP110, ILF3, NAV3, CTR9, ATRX, HEATR6, PRICKLE1, ZFP770, EIF2S2, ZNHIT1	1157	145	16021	2.19642	0.874785	0.187608	1.2628
UP_SEQ_FEATURE	repeat:ANK 20	5	0.320718	0.000790745	ANKRD52, ANKRD17, ANKRD44, ANK2, ANKFY1	1157	7	16021	9.89073	0.902054	0.190398	1.41102
UP_SEQ_FEATURE	repeat:ANK 21	5	0.320718	0.000790745	ANKRD52, ANKRD17, ANKRD44, ANK2, ANKFY1	1157	7	16021	9.89073	0.902054	0.190398	1.41102
UP_SEQ_FEATURE	repeat:ANK 17	5	0.320718	0.000790745	ANKRD52, ANKRD17, ANKRD44, ANK2, ANKFY1	1157	7	16021	9.89073	0.902054	0.190398	1.41102
UP_SEQ_FEATURE	repeat:ANK 19	5	0.320718	0.000790745	ANKRD52, ANKRD17, ANKRD44, ANK2, ANKFY1	1157	7	16021	9.89073	0.902054	0.190398	1.41102
UP_SEQ_FEATURE	repeat:ANK 18	5	0.320718	0.000790745	ANKRD52, ANKRD17, ANKRD44, ANK2, ANKFY1	1157	7	16021	9.89073	0.902054	0.190398	1.41102
UP_SEQ_FEATURE	repeat:HEAT 4	10	0.641437	0.0010099	HEATR6, CKAP5, HTT, CLASP1, PSME4, CLASP2, KPNB1, TNPO1, NCAPD3, AI314180	1157	37	16021	3.74244	0.948572	0.219091	1.79874
UP_SEQ_FEATURE	repeat:ANK 15	5	0.320718	0.00149118	ANKRD52, ANKRD17, ANKRD44, ANK2, ANKFY1	1157	8	16021	8.65439	0.987511	0.286194	2.64517
UP_SEQ_FEATURE	repeat:ANK 16	5	0.320718	0.00149118	ANKRD52, ANKRD17, ANKRD44, ANK2, ANKFY1	1157	8	16021	8.65439	0.987511	0.286194	2.64517
UP_SEQ_FEATURE	zinc finger region:PHD-type 2	8	0.513149	0.00151478	MLLT10, KDM4A, MLL3, KDM5A, KDM5C, CHD4, DPF1, MYST3	1157	25	16021	4.43105	0.988348	0.272412	2.68649
UP_SEQ_FEATURE	compositionally biased region:Pro-rich	73	4.68249	0.00179098	MTSS1, ENAH, CPEB3, FNDC3C1, VPRBP, C230081A13RIK, WHAMM, PNN, FUBP1, PHC3, ZFP784, BAG4, MLL5, SRRM2, CDK12, RNF38, SRRM1, RC3H2, DNAJC6, ACIN1, BAT2L2, BRD4, MLL3, CEP110, BTBD7, RPH3A, JMY, MED19, BC021891, TTLL10, DOK3, MTF1, BC057022, CPSF6, GNAS, FCHSD1, GIGYF2, OTUD5, CHKA, RBM33, ZC3H4, TNRC18, WBP11, 9430020K01RIK, CBLL1, DAAM1, ZFP318, D19WSU162E, TCF7L2, TSC22D1, SFRS18, MIA3, PBRM1, C…	1157	707	16021	1.42975	0.99483	0.296008	3.16893
UP_SEQ_FEATURE	compositionally biased region:Glu-rich	32	2.0526	0.00181281	ABCF1, SOLH, TNRC18, SPOCK2, FAM193A, TMX4, ARID4B, GON4L, RDX, FAM13B, PNN, ESF1, ZFP91, RNF168, BAT2L2, ACIN1, LUC7L3, CHD4, RBM25, STAMBP, ARGLU1, BRD2, SOX12, STK3, PPARGC1B, SAFB2, SLTM, CNTF, CSRNP3, TIMELESS, SMARCC1, GNAS, GIGYF2	1157	247	16021	1.79395	0.995151	0.283276	3.20696
UP_SEQ_FEATURE	repeat:HEAT 1	11	0.705581	0.00192721	HEATR6, 2310035C23RIK, CKAP5, HTT, CLASP1, PSME4, CLASP2, KPNB1, TNPO1, NCAPD3, AI314180	1157	48	16021	3.17327	0.996537	0.283427	3.40605
UP_SEQ_FEATURE	repeat:HEAT 2	11	0.705581	0.00192721	HEATR6, 2310035C23RIK, CKAP5, HTT, CLASP1, PSME4, CLASP2, KPNB1, TNPO1, NCAPD3, AI314180	1157	48	16021	3.17327	0.996537	0.283427	3.40605
UP_SEQ_FEATURE	compositionally biased region:Poly-Asn	6	0.384862	0.00223741	IRS2, FAM193A, FNDC3C1, BMPR2, MAPK8IP2, C230081A13RIK	1157	14	16021	5.93444	0.99861	0.306136	3.94394
UP_SEQ_FEATURE	compositionally biased region:Poly-Gln	20	1.28287	0.00246352	ASXL2, HTT, ADCY5, CREBBP, HIRA, NAV3, MED13, LIN7A, ATRX, TSC22D1, BRWD1, GTF2A1, DHX29, ATXN7, SFPQ, SMURF2, LRCH3, POU3F2, NCOR1, CLOCK	1157	130	16021	2.13031	0.999286	0.317012	4.33424
UP_SEQ_FEATURE	repeat:ANK 14	5	0.320718	0.00253126	ANKRD52, ANKRD17, ANKRD44, ANK2, ANKFY1	1157	9	16021	7.69279	0.999415	0.310774	4.45087
UP_SEQ_FEATURE	repeat:ANK 13	5	0.320718	0.00253126	ANKRD52, ANKRD17, ANKRD44, ANK2, ANKFY1	1157	9	16021	7.69279	0.999415	0.310774	4.45087
UP_SEQ_FEATURE	zinc finger region:PHD-type 1	8	0.513149	0.00308485	MLLT10, KDM4A, MLL3, KDM5A, KDM5C, CHD4, DPF1, MYST3	1157	28	16021	3.95629	0.999885	0.350859	5.39902
UP_SEQ_FEATURE	domain:WW 2	8	0.513149	0.00308485	MAGI2, NEDD4, WWP2, BAG3, WWC2, SMURF2, WWOX, PRPF40A	1157	28	16021	3.95629	0.999885	0.350859	5.39902
UP_SEQ_FEATURE	domain:WW 1	8	0.513149	0.00308485	MAGI2, NEDD4, WWP2, BAG3, WWC2, SMURF2, WWOX, PRPF40A	1157	28	16021	3.95629	0.999885	0.350859	5.39902
UP_SEQ_FEATURE	repeat:ANK 24	4	0.256575	0.00335464	ANKRD52, ANKRD17, ANKRD44, ANK2	1157	5	16021	11.0776	0.999948	0.361477	5.85788
UP_SEQ_FEATURE	repeat:ANK 12	5	0.320718	0.00397913	ANKRD52, ANKRD17, ANKRD44, ANK2, ANKFY1	1157	10	16021	6.92351	0.999992	0.398982	6.91195
UP_SEQ_FEATURE	repeat:HEAT 5	8	0.513149	0.0046743	CKAP5, HTT, CLASP1, PSME4, CLASP2, KPNB1, TNPO1, AI314180	1157	30	16021	3.69254	0.999999	0.436371	8.07221
UP_SEQ_FEATURE	cross-link:Glycyl lysine isopeptide (Lys-Gly) (interchain with G-Cter in ubiquitin)	23	1.4753	0.00472905	EGFR, ABCF1, SETDB1, RBBP4, TNRC18, MYH4, GON4L, VPRBP, CHEK1, NKTR, ATAD1, BAT2L, RPS6KA2, HIST2H2BE, HIST1H3B, HIST3H2A, GNAS, PCYOX1, ACIN1, PSMD7, KPNB1, RBM25, CALM1	1157	168	16021	1.89572	0.999999	0.42701	8.16301
UP_SEQ_FEATURE	repeat:TPR 6	11	0.705581	0.00545207	BBS4, UTY, TTC30A1, NAA15, NAA16, VPS13A, TMTC3, CDC16, APPBP2, ANAPC7, CTR9	1157	55	16021	2.7694	1	0.460741	9.35413
UP_SEQ_FEATURE	DNA-binding region:HMG box	9	0.577293	0.00590437	SOX11, SOX12, SOX5, BBX, SOX4, PBRM1, HBP1, SOX9, TCF7L2	1157	39	16021	3.19547	1	0.474901	10.0918
UP_SEQ_FEATURE	compositionally biased region:Poly-Ser	42	2.69403	0.00602451	IGDCC4, BCLAF1, MEF2A, D5ERTD579E, FAM193A, ARID4B, BMPR2, SOX4, FGF10, RLIM, CBX5, MAP3K7, PRUNE2, TCP11, ANK2, BAG3, NUP210, SYN2, HBP1, BAT2L2, RANBP2, CCNO, WDFY3, ERF, IRS2, SOX11, ANKS3, ASXL1, ZCCHC14, FNIP1, ATRX, PPIG, HELB, ATXN7, SP4, D930015E06RIK, BCL6B, BUB1B, MGA, IL12B, NCOR1, CTDP1	1157	379	16021	1.5345	1	0.469449	10.2868
UP_SEQ_FEATURE	repeat:ANK 22	4	0.256575	0.00634981	ANKRD52, ANKRD17, ANKRD44, ANK2	1157	6	16021	9.23135	1	0.475407	10.8128
UP_SEQ_FEATURE	repeat:ANK 23	4	0.256575	0.00634981	ANKRD52, ANKRD17, ANKRD44, ANK2	1157	6	16021	9.23135	1	0.475407	10.8128
UP_SEQ_FEATURE	repeat:TPR 7	10	0.641437	0.00765864	BBS4, UTY, TTC30A1, NAA15, NAA16, TMTC3, CDC16, APPBP2, ANAPC7, CTR9	1157	49	16021	2.82592	1	0.528891	12.8998
UP_SEQ_FEATURE	repeat:ANK 5	16	1.0263	0.00978741	NFKBIE, ANKS3, HACE1, FEM1A, ANKRD52, ANKRD17, ANKRD26, ANKRD44, NOTCH1, ANK2, ZDHHC13, NOTCH4, PPP1R12A, ANKFY1, ASB7, GABPB2	1157	107	16021	2.07058	1	0.606174	16.196
UP_SEQ_FEATURE	repeat:TPR 5	11	0.705581	0.011379	BBS4, UTY, TTC30A1, NAA15, NAA16, VPS13A, TMTC3, CDC16, APPBP2, ANAPC7, CTR9	1157	61	16021	2.497	1	0.650191	18.583
UP_SEQ_FEATURE	nucleotide phosphate-binding region:ATP	84	5.38807	0.0140493	KIF22, SPG7, D5ERTD579E, PRPF4B, DICER1, INO80, RPS6KB1, AURKB, PRKG1, C230081A13RIK, INSRR, MAP3K7, KIF13A, CSNK2A1, MOS, CDK12, DHX36, TLK1, PRKACB, PRKCA, NMNAT3, EGFR, SRPK2, NLRP6, KIF5B, KIF5C, WNK1, MYH4, STK4, STK3, BC021891, MAST4, ACVR2B, KIF1B, EIF2AK1, DHX29, RFC1, HIPK1, RIOK3, SMARCAL1, CAMK1, BUB1B, YME1L1, CHKA, GNE, STK11, NEK1, BMPR2, STK17B, CHEK1, KCNJ1, IRAK4, CHD8, DDX46, MA…	1157	907	16021	1.28241	1	0.716134	22.4443
UP_SEQ_FEATURE	compositionally biased region:His-rich	11	0.705581	0.0141674	TSC22D1, TAF2, GCAP14, RNF43, RBM33, CHD8, PRPF4B, CPEB4, CREB5, NUFIP2, ZCCHC14	1157	63	16021	2.41773	1	0.708457	22.611
UP_SEQ_FEATURE	repeat:TPR 4	13	0.833868	0.0142674	BBS4, UTY, TTC30A1, NAA15, NAA16, CDC16, 9130404D08RIK, CTR9, INTS8, TMTC3, VPS13A, APPBP2, ANAPC7	1157	82	16021	2.19526	1	0.700565	22.7519
UP_SEQ_FEATURE	domain:HECT	6	0.384862	0.0149109	NEDD4, WWP2, UBE3A, HACE1, SMURF2, HERC2	1157	21	16021	3.95629	1	0.70643	23.6528
UP_SEQ_FEATURE	domain:SAP	6	0.384862	0.0149109	SLTM, MAMSTR, XRCC6, ACIN1, MKL2, SAFB2	1157	21	16021	3.95629	1	0.70643	23.6528
UP_SEQ_FEATURE	short sequence motif:JAMM motif	4	0.256575	0.0159359	STAMBP, BRCC3, COPS5, MYSM1	1157	8	16021	6.92351	1	0.720611	25.0673
UP_SEQ_FEATURE	compositionally biased region:Poly-Thr	9	0.577293	0.0181494	PHC3, RAD23B, ANKRD17, HTT, SP4, BMPR2, MGA, NAT10, NRXN1	1157	47	16021	2.65156	1	0.75723	28.0381
UP_SEQ_FEATURE	repeat:ANK 3	20	1.28287	0.0205872	NFKBIE, ANKMY2, ANKS3, HACE1, FEM1A, ANKRD52, ANKRD17, ANKRD26, ANKRD44, ANKRD13C, NOTCH1, ANK2, ZDHHC13, NOTCH4, ACAP2, PPP1R12A, BCOR, ANKFY1, ASB7, GABPB2	1157	159	16021	1.74176	1	0.791237	31.1811
UP_SEQ_FEATURE	compositionally biased region:Poly-Asp	12	0.769724	0.0238163	ATRX, ELF1, PPP2R3A, DDX46, NUCKS1, NAA15, PBRM1, ZC3H11A, HBP1, IPO8, KPNB1, CTDP1	1157	78	16021	2.13031	1	0.829645	35.1451
UP_SEQ_FEATURE	repeat:ANK 6	12	0.769724	0.0238163	ANKRD52, ANKRD17, ANKRD44, ANK2, NFKBIE, ZDHHC13, ANKS3, PPP1R12A, HACE1, FEM1A, ANKFY1, ASB7	1157	78	16021	2.13031	1	0.829645	35.1451
UP_SEQ_FEATURE	repeat:ANK 11	5	0.320718	0.0243651	ANKRD52, ANKRD17, ANKRD44, ANK2, ANKFY1	1157	16	16021	4.32719	1	0.829153	35.7969
UP_SEQ_FEATURE	domain:JmjC	7	0.449006	0.024989	PHF2, HIF1AN, KDM2A, UTY, KDM4A, KDM5A, KDM5C	1157	32	16021	3.02904	1	0.829607	36.5305
UP_SEQ_FEATURE	zinc finger region:PHD-type	8	0.513149	0.0259283	ATRX, ZMYND11, MLL5, PHF2, BAZ1B, KDM2A, PHF13, BAZ2A	1157	41	16021	2.70186	1	0.833761	37.62
UP_SEQ_FEATURE	repeat:ANK 25	3	0.192431	0.0282961	ANKRD52, ANKRD17, ANKRD44	1157	4	16021	10.3853	1	0.852805	40.2885
UP_SEQ_FEATURE	domain:LisH	6	0.384862	0.0306781	WDR47, TBL1XR1, 2310035C23RIK, ARMC9, VPRBP, PAFAH1B1	1157	25	16021	3.32328	1	0.869138	42.8641
UP_SEQ_FEATURE	domain:BTB	15	0.962155	0.0327065	BACH1, ZBTB7A, NACC1, ENC1, KCTD20, GAN, BTBD9, ZBTB43, GMCL1, KLHL28, BCL6B, ZBTB5, KLHL24, ANKFY1, KBTBD11	1157	113	16021	1.8381	1	0.880346	44.9742
UP_SEQ_FEATURE	repeat:HEAT 6	6	0.384862	0.0357988	CKAP5, CLASP1, PSME4, KPNB1, TNPO1, AI314180	1157	26	16021	3.19547	1	0.897518	48.05
UP_SEQ_FEATURE	DNA-binding region:ETS	6	0.384862	0.0357988	ERF, ERG, ELF1, ELF2, ELK1, ETV4	1157	26	16021	3.19547	1	0.897518	48.05
UP_SEQ_FEATURE	domain:PCI	5	0.320718	0.0365363	EIF3C, PSMD11, EIF3E, COPS4, PSMD6	1157	18	16021	3.84639	1	0.897452	48.7592
UP_SEQ_FEATURE	domain:Bromo	5	0.320718	0.0365363	ZMYND11, BAZ1B, CREBBP, BAZ2A, BRD8	1157	18	16021	3.84639	1	0.897452	48.7592
UP_SEQ_FEATURE	repeat:ANK 4	16	1.0263	0.0377941	NFKBIE, ANKS3, HACE1, FEM1A, ANKRD52, ANKRD17, ANKRD26, ANKRD44, NOTCH1, ANK2, ZDHHC13, NOTCH4, PPP1R12A, ANKFY1, ASB7, GABPB2	1157	126	16021	1.75835	1	0.900664	49.9478
UP_SEQ_FEATURE	domain:MPN	4	0.256575	0.039911	STAMBP, COPS5, PSMD7, MYSM1	1157	11	16021	5.03528	1	0.908593	51.8894
UP_SEQ_FEATURE	zinc finger region:C3H1-type 2	6	0.384862	0.041415	ZC3H15, ZC3H4, ZC3H11A, ZC3HAV1L, MBNL1, ZC3H8	1157	27	16021	3.07712	1	0.912474	53.2255
UP_SEQ_FEATURE	metal ion-binding site:Iron; catalytic	6	0.384862	0.041415	HIF1AN, KDM2A, ALOX12E, KDM4A, ALKBH2, TET1	1157	27	16021	3.07712	1	0.912474	53.2255
UP_SEQ_FEATURE	zinc finger region:C3H1-type 1	6	0.384862	0.041415	ZC3H15, ZC3H4, ZC3H11A, ZC3HAV1L, MBNL1, ZC3H8	1157	27	16021	3.07712	1	0.912474	53.2255
UP_SEQ_FEATURE	repeat:TPR 3	15	0.962155	0.044802	BBS4, UTY, TTC30A1, NAA15, NAA16, CDC16, 9130404D08RIK, CTR9, ST13, INTS8, VPS13A, TMTC3, RANBP2, APPBP2, ANAPC7	1157	118	16021	1.76021	1	0.924896	56.1071
UP_SEQ_FEATURE	domain:C2 tensin-type	3	0.192431	0.0449237	TNS3, DNAJC6, PTEN	1157	5	16021	8.30821	1	0.921692	56.2074
UP_SEQ_FEATURE	region of interest:S-adenosyl-L-methionine binding	6	0.384862	0.0475335	MTR, SETD8, NSUN3, MLL3, METTL11A, MEPCE	1157	28	16021	2.96722	1	0.929261	58.3081
UP_SEQ_FEATURE	repeat:TPR 1	16	1.0263	0.0477021	BBS4, UTY, TTC30A1, NAA15, NAA16, CDC16, 9130404D08RIK, FEM1A, CTR9, ST13, INTS8, VPS13A, TMTC3, ANAPC7, RANBP2, APPBP2	1157	130	16021	1.70425	1	0.926469	58.4404
UP_SEQ_FEATURE	repeat:TPR 2	16	1.0263	0.0477021	BBS4, UTY, TTC30A1, NAA15, NAA16, CDC16, 9130404D08RIK, FEM1A, CTR9, ST13, INTS8, VPS13A, TMTC3, ANAPC7, RANBP2, APPBP2	1157	130	16021	1.70425	1	0.926469	58.4404
UP_SEQ_FEATURE	domain:ARID	4	0.256575	0.0504319	ARID5B, ARID4B, KDM5A, KDM5C	1157	12	16021	4.61567	1	0.933729	60.5293
UP_SEQ_FEATURE	domain:RRM	13	0.833868	0.0525653	FUS, 0610009D07RIK, TRA2B, PPARGC1A, PPARGC1B, SAFB2, CNOT4, SLTM, RBPMS, PABPN1L, PPRC1, CPSF6, RBM25	1157	99	16021	1.8183	1	0.938103	62.0923
UP_SEQ_FEATURE	repeat:TPR 8	7	0.449006	0.0529219	BBS4, UTY, TTC30A1, NAA15, TMTC3, APPBP2, CTR9	1157	38	16021	2.55077	1	0.936287	62.3478
UP_SEQ_FEATURE	domain:C2	10	0.641437	0.0546978	PRKCA, NEDD4, WWP2, RASAL3, WWC2, PIK3CA, SMURF2, ITSN2, PLCB1, RIMS4	1157	68	16021	2.03633	1	0.939198	63.5961
UP_SEQ_FEATURE	repeat:ANK 2	21	1.34702	0.0595361	NFKBIE, ANKMY2, ANKS3, HACE1, FEM1A, ANKRD52, ANKRD45, ANKRD17, ANKRD26, ANKRD44, NOTCH1, ANKRD13C, ANK2, ZDHHC13, NOTCH4, ACAP2, PPP1R12A, BCOR, ANKFY1, ASB7, GABPB2	1157	191	16021	1.52245	1	0.950444	66.8019
UP_SEQ_FEATURE	repeat:ANK 1	21	1.34702	0.0595361	NFKBIE, ANKMY2, ANKS3, HACE1, FEM1A, ANKRD52, ANKRD45, ANKRD17, ANKRD26, ANKRD44, NOTCH1, ANKRD13C, ANK2, ZDHHC13, NOTCH4, ACAP2, PPP1R12A, BCOR, ANKFY1, ASB7, GABPB2	1157	191	16021	1.52245	1	0.950444	66.8019
UP_SEQ_FEATURE	repeat:HEAT 7	5	0.320718	0.0602717	CKAP5, CLASP1, KPNB1, TNPO1, AI314180	1157	21	16021	3.29691	1	0.949866	67.2652
UP_SEQ_FEATURE	glycosylation site:O-linked (Xyl...) (glycosaminoglycan)	4	0.256575	0.0621478	COL9A2, SPOCK2, TGFBR3, SPOCK1	1157	13	16021	4.26062	1	0.952139	68.4196
UP_SEQ_FEATURE	domain:Phosphatase tensin-type	3	0.192431	0.0642106	TNS3, DNAJC6, PTEN	1157	6	16021	6.92351	1	0.954674	69.6444
UP_SEQ_FEATURE	domain:IBB	3	0.192431	0.0642106	SNUPN, KPNA2, KPNA1	1157	6	16021	6.92351	1	0.954674	69.6444
UP_SEQ_FEATURE	short sequence motif:PxVxL motif	3	0.192431	0.0642106	ATRX, SP100, STAM2	1157	6	16021	6.92351	1	0.954674	69.6444
UP_SEQ_FEATURE	active site:Glycyl thioester intermediate	9	0.577293	0.070739	NEDD4, WWP2, UBE3A, HACE1, SMURF2, UBE2H, HERC2, UBE2L3, UBE2B	1157	61	16021	2.043	1	0.9655	73.2317
UP_SEQ_FEATURE	domain:Importin N-terminal	4	0.256575	0.0749965	IPO8, XPO7, KPNB1, TNPO1	1157	14	16021	3.95629	1	0.970474	75.3513
UP_SEQ_FEATURE	domain:Actin-binding	4	0.256575	0.0749965	SPNB2, DST, FLNB, PLEC	1157	14	16021	3.95629	1	0.970474	75.3513
UP_SEQ_FEATURE	domain:TTL	4	0.256575	0.0749965	TTLL10, TTLL1, TTLL13, TTLL3	1157	14	16021	3.95629	1	0.970474	75.3513
UP_SEQ_FEATURE	region of interest:Interaction with TP53	3	0.192431	0.0856872	HIPK1, AIMP2, MED1	1157	7	16021	5.93444	1	0.981434	79.9968
UP_SEQ_FEATURE	domain:W2	3	0.192431	0.0856872	BZW2, EIF4G1, EIF5	1157	7	16021	5.93444	1	0.981434	79.9968
UP_SEQ_FEATURE	zinc finger region:Matrin-type 2	3	0.192431	0.0856872	ZFP385B, ZMAT4, ZFP318	1157	7	16021	5.93444	1	0.981434	79.9968
UP_SEQ_FEATURE	zinc finger region:Matrin-type 1	3	0.192431	0.0856872	ZFP385B, ZMAT4, ZFP318	1157	7	16021	5.93444	1	0.981434	79.9968
UP_SEQ_FEATURE	zinc finger region:RanBP2-type	4	0.256575	0.0889069	FUS, NEIL3, RBM5, MDM4	1157	15	16021	3.69254	1	0.983119	81.2251
UP_SEQ_FEATURE	domain:Helicase C-terminal	11	0.705581	0.0902465	ATRX, CHD8, DDX46, DHX29, SMARCAL1, DICER1, INO80, DHX36, SUPV3L1, CHD4, DDX6	1157	86	16021	1.77113	1	0.983178	81.7148
UP_SEQ_FEATURE	repeat:ANK 10	5	0.320718	0.0904045	ANKRD52, ANKRD17, ANKRD44, ANK2, ANKFY1	1157	24	16021	2.8848	1	0.982284	81.7718
UP_SEQ_FEATURE	repeat:ANK 9	6	0.384862	0.0948042	ANKRD52, ANKRD17, ANKRD44, ANK2, FEM1A, ANKFY1	1157	34	16021	2.44359	1	0.984688	83.2923

## Sheet: Tan
Category	Term	Count	%	PValue	Genes	List Total	Pop Hits	Pop Total	Fold Enrichment	Bonferroni	Benjamini	FDR
SP_PIR_KEYWORDS	endoplasmic reticulum	18	26.4706	3.64086e-11	CRELD2, CANX, SEC63, TAPBP, UGT1A9, SLC35B1, UGT1A7C, UGT1A6B, UGT1A2, TAP2, UGT1A6A, UGT1A5, INSIG1, ERAP1, IL15RA, HSPA5, PPAP2B, P4HB, HERPUD1, UGT1A1, UGT1A10, PTGDS, SDF2L1, CALR3, SEC23B	60	678	17854	7.9	4.87874e-09	4.87874e-09	4.26282e-08
GOTERM_CC_FAT	GO:0005783~endoplasmic reticulum	18	26.4706	1.18919e-10	CRELD2, CANX, SEC63, TAPBP, UGT1A9, SLC35B1, UGT1A7C, UGT1A6B, UGT1A2, TAP2, UGT1A6A, UGT1A5, INSIG1, ERAP1, IL15RA, HSPA5, PPAP2B, P4HB, HERPUD1, UGT1A1, UGT1A10, PTGDS, SDF2L1, CALR3, SEC23B	40	838	12504	6.71456	1.05838e-08	1.05838e-08	1.2909e-07
GOTERM_CC_FAT	GO:0005788~endoplasmic reticulum lumen	5	7.35294	7.13722e-05	P4HB, SDF2L1, TAP2, CALR3, HSPA5	40	72	12504	21.7083	0.00633222	0.00317114	0.0774494
GOTERM_CC_FAT	GO:0044432~endoplasmic reticulum part	7	10.2941	7.29666e-05	P4HB, HERPUD1, SDF2L1, TAP2, CALR3, HSPA5, SEC23B	40	231	12504	9.47273	0.00647322	0.00216241	0.0791789
INTERPRO	IPR000886:Endoplasmic reticulum, targeting sequence	4	5.88235	0.000410711	P4HB, SDF2L1, CALR3, HSPA5	61	43	17763	27.0881	0.0628441	0.0628441	0.493741
GOTERM_BP_FAT	GO:0010033~response to organic substance	8	11.7647	0.00094694	HERPUD1, CYP2D22, UGT1A1, MANF, UGT1A10, UGT1A9, EIF4EBP1, UGT1A7C, HMGCS2, UGT1A2, UGT1A6B, TAP2, UGT1A5, UGT1A6A, ADAM9	44	505	13588	4.89217	0.321236	0.321236	1.31695
UP_SEQ_FEATURE	short sequence motif:Prevents secretion from ER	4	5.88235	0.0011448	P4HB, SDF2L1, CALR3, HSPA5	57	59	16021	19.0556	0.254154	0.254154	1.48251
GOTERM_MF_FAT	GO:0051082~unfolded protein binding	4	5.88235	0.0013873	DNAJB9, CALR3, CANX, SEC63	43	70	13288	17.6585	0.166284	0.166284	1.60587
INTERPRO	IPR012317:Poly(ADP-ribose) polymerase, catalytic region	3	4.41176	0.00147693	PARP12, PARP9, PARP3	61	17	17763	51.3877	0.208264	0.110204	1.76509
SP_PIR_KEYWORDS	Chaperone	5	7.35294	0.00152189	P4HB, DNAJB9, CALR3, CANX, SEC63	60	150	17854	9.91889	0.18461	0.0970104	1.76743
GOTERM_MF_FAT	GO:0003950~NAD+ ADP-ribosyltransferase activity	3	4.41176	0.00178739	PARP12, PARP9, PARP3	43	20	13288	46.3535	0.208922	0.110574	2.0646
GOTERM_CC_FAT	GO:0042470~melanosome	4	5.88235	0.00232216	P4HB, CAPG, HSPA5, CANX	40	85	12504	14.7106	0.18691	0.0504131	2.49213
GOTERM_CC_FAT	GO:0048770~pigment granule	4	5.88235	0.00232216	P4HB, CAPG, HSPA5, CANX	40	85	12504	14.7106	0.18691	0.0504131	2.49213
GOTERM_BP_FAT	GO:0005996~monosaccharide metabolic process	5	7.35294	0.0030427	PHKA2, UGT1A10, UGT1A9, UGT1A7C, UGT1A6B, UGT1A2, UGT1A6A, UGT1A5, PDK4, PHKA1, ENO3, UGT1A1	44	191	13588	8.08425	0.712451	0.463764	4.17457
UP_SEQ_FEATURE	topological domain:Lumenal	7	10.2941	0.0031317	TAP2, INSIG1, ERAP1, PPAP2B, CANX, SEC63, TAPBP	57	414	16021	4.75239	0.552005	0.330676	4.00745
KEGG_PATHWAY	mmu04612:Antigen processing and presentation	4	5.88235	0.00477739	TAP2, HSPA5, CANX, TAPBP	23	91	5738	10.9661	0.19386	0.19386	4.40368
GOTERM_BP_FAT	GO:0006457~protein folding	4	5.88235	0.00749362	DNAJB9, CALR3, CANX, SEC63	44	127	13588	9.72656	0.953877	0.641375	9.99048
PIR_SUPERFAMILY	PIRSF015844:phosphorylase b kinase, regulatory subunit alpha	2	2.94118	0.00785129	PHKA2, PHKA1	33	2	8136	246.545	0.276151	0.276151	6.99697
GOTERM_MF_FAT	GO:0016763~transferase activity, transferring pentosyl groups	3	4.41176	0.00811336	PARP12, PARP9, PARP3	43	43	13288	21.5598	0.656025	0.299337	9.0626
GOTERM_BP_FAT	GO:0006006~glucose metabolic process	4	5.88235	0.00977921	PHKA2, PDK4, PHKA1, ENO3	44	140	13588	8.82338	0.982036	0.633899	12.848
INTERPRO	IPR008734:Phosphorylase kinase alphabeta	2	2.94118	0.0100998	PHKA2, PHKA1	61	3	17763	194.131	0.798886	0.414112	11.5126
UP_SEQ_FEATURE	region of interest:4 X approximate repeats	2	2.94118	0.0104503	CALR3, CANX	57	3	16021	187.38	0.932075	0.591984	12.8015
SMART	SM00336:BBOX	3	4.41176	0.0141053	TRIM56, TRIM34, LOC640746, TRIM21	27	64	9131	15.8524	0.365288	0.365288	11.5766
SP_PIR_KEYWORDS	transferase	11	16.1765	0.0145732	HIGD1C, PDK4, PHKA1, UGT1A1, UGT1A10, UGT1A9, PARP12, HMGCS2, PARP9, UGT1A7C, UGT1A2, UGT1A6B, SULT1A1, UGT1A5, UGT1A6A, BUB1B, PARP3, METTL7A1, METTL7A2	60	1385	17854	2.36335	0.86015	0.480936	15.7923
GOTERM_BP_FAT	GO:0009725~response to hormone stimulus	4	5.88235	0.0152104	UGT1A10, EIF4EBP1, UGT1A9, HMGCS2, UGT1A7C, UGT1A6B, UGT1A2, UGT1A6A, UGT1A5, UGT1A1, ADAM9	44	165	13588	7.4865	0.998106	0.714574	19.3037
GOTERM_BP_FAT	GO:0019318~hexose metabolic process	4	5.88235	0.0162091	PHKA2, PDK4, PHKA1, ENO3	44	169	13588	7.30931	0.998749	0.671748	20.4414
INTERPRO	IPR018124:Calreticulin/calnexin, conserved site	2	2.94118	0.0167772	CALR3, CANX	61	5	17763	116.479	0.930975	0.487432	18.4425
INTERPRO	IPR001580:Calreticulin/calnexin	2	2.94118	0.0167772	CALR3, CANX	61	5	17763	116.479	0.930975	0.487432	18.4425
INTERPRO	IPR000315:Zinc finger, B-box	3	4.41176	0.0197798	TRIM56, TRIM34, LOC640746, TRIM21	61	64	17763	13.6498	0.957426	0.468103	21.3933
GOTERM_BP_FAT	GO:0009719~response to endogenous stimulus	4	5.88235	0.0202782	UGT1A10, EIF4EBP1, UGT1A9, HMGCS2, UGT1A7C, UGT1A6B, UGT1A2, UGT1A6A, UGT1A5, UGT1A1, ADAM9	44	184	13588	6.71344	0.99977	0.697903	24.9244
SP_PIR_KEYWORDS	carbohydrate metabolism	3	4.41176	0.0242817	PHKA2, PDK4, PHKA1	60	73	17854	12.2288	0.962891	0.561096	25.0093
GOTERM_CC_FAT	GO:0031090~organelle membrane	7	10.2941	0.0377448	HERPUD1, PDK4, UGT1A1, UGT1A10, ATAD3A, UGT1A9, UGT1A7C, HMGCS2, PTGDS, UGT1A2, UGT1A6B, UGT1A5, UGT1A6A, SEC23B	40	809	12504	2.70482	0.967429	0.495842	34.1417
UP_SEQ_FEATURE	domain:PARP catalytic	2	2.94118	0.0377961	PARP12, PARP9	57	11	16021	51.1037	0.999948	0.915064	39.492
GOTERM_CC_FAT	GO:0016023~cytoplasmic membrane-bounded vesicle	5	7.35294	0.0391336	P4HB, CAPG, HSPA5, CANX, SEC23B	40	414	12504	3.77536	0.971358	0.446861	35.1662
GOTERM_CC_FAT	GO:0031988~membrane-bounded vesicle	5	7.35294	0.0409161	P4HB, CAPG, HSPA5, CANX, SEC23B	40	420	12504	3.72143	0.975721	0.412078	36.4599
UP_SEQ_FEATURE	repeat:1-4	2	2.94118	0.0445158	CALR3, CANX	57	13	16021	43.2416	0.999991	0.90285	44.7762
INTERPRO	IPR007123:Gelsolin region	2	2.94118	0.0462815	CAPG, SEC23B	61	14	17763	41.5995	0.99944	0.712879	43.5017
INTERPRO	IPR011700:Basic leucine zipper	2	2.94118	0.0495055	CEBPB, XBP1	61	15	17763	38.8262	0.999672	0.6821	45.7604
UP_SEQ_FEATURE	repeat:2-3	2	2.94118	0.0511894	CALR3, CANX	57	15	16021	37.476	0.999999	0.89375	49.5995
INTERPRO	IPR013216:Methyltransferase type 11	2	2.94118	0.0527188	HIGD1C, METTL7A1, METTL7A2	61	16	17763	36.3996	0.999808	0.65687	47.929
UP_SEQ_FEATURE	domain:Leucine-zipper	3	4.41176	0.0538952	CEBPB, XBP1, IFI35	57	107	16021	7.88047	0.999999	0.868155	51.4419
UP_SEQ_FEATURE	repeat:1-3	2	2.94118	0.054509	CALR3, CANX	57	16	16021	35.1338	0.999999	0.833644	51.851
GOTERM_BP_FAT	GO:0007167~enzyme linked receptor protein signaling pathway	4	5.88235	0.0549405	TXNIP, EIF4EBP1, BAMBI, ADAM9	44	273	13588	4.52481	1	0.944365	54.6482
SP_PIR_KEYWORDS	signal	16	23.5294	0.0559529	P4HB, A2M, CRELD2, ADCYAP1R1, CECR5, CANX, UGT1A1, MANF, TAPBP, UGT1A10, UGT1A9, PTGDS, UGT1A7C, UGT1A2, UGT1A6B, SDF2L1, UGT1A5, UGT1A6A, IL15RA, CALR3, HSPA5, BAMBI, ADAM9	60	2970	17854	1.60305	0.999554	0.786287	49.0413
PIR_SUPERFAMILY	PIRSF001733:tripartite motif-containing protein	2	2.94118	0.0574482	TRIM34, LOC640746, TRIM21	33	15	8136	32.8727	0.911587	0.702657	41.9852
GOTERM_BP_FAT	GO:0051384~response to glucocorticoid stimulus	2	2.94118	0.0584821	UGT1A10, UGT1A9, UGT1A7C, UGT1A6B, UGT1A2, UGT1A6A, UGT1A5, UGT1A1, ADAM9	44	19	13588	32.5072	1	0.935337	56.9694
SP_PIR_KEYWORDS	glycogen metabolism	2	2.94118	0.060984	PHKA2, PHKA1	60	19	17854	31.3228	0.999782	0.754701	52.1318
GOTERM_CC_FAT	GO:0005743~mitochondrial inner membrane	4	5.88235	0.0642462	UGT1A10, ATAD3A, UGT1A9, HMGCS2, UGT1A7C, UGT1A6B, UGT1A2, UGT1A6A, UGT1A5, PDK4, UGT1A1	40	296	12504	4.22432	0.997287	0.522281	51.3648
GOTERM_CC_FAT	GO:0005576~extracellular region	10	14.7059	0.0697047	A2M, CRELD2, PTGDS, CAPG, CMTM7, IL15RA, ERAP1, HSPA5, MANF, ADAM9	40	1680	12504	1.86071	0.998388	0.510565	54.3575
SP_PIR_KEYWORDS	unfolded protein response	2	2.94118	0.0702728	HERPUD1, MANF	60	22	17854	27.0515	0.999943	0.752124	57.3914
GOTERM_BP_FAT	GO:0031960~response to corticosteroid stimulus	2	2.94118	0.0703614	UGT1A10, UGT1A9, UGT1A7C, UGT1A6B, UGT1A2, UGT1A6A, UGT1A5, UGT1A1, ADAM9	44	23	13588	26.8538	1	0.949412	63.9743
GOTERM_BP_FAT	GO:0002478~antigen processing and presentation of exogenous peptide antigen	2	2.94118	0.0703614	TAP2, TAPBP	44	23	13588	26.8538	1	0.949412	63.9743
GOTERM_BP_FAT	GO:0006695~cholesterol biosynthetic process	2	2.94118	0.0703614	HMGCS2, INSIG1	44	23	13588	26.8538	1	0.949412	63.9743
GOTERM_CC_FAT	GO:0031410~cytoplasmic vesicle	5	7.35294	0.0723557	P4HB, CAPG, HSPA5, CANX, SEC23B	40	508	12504	3.07677	0.99875	0.487499	55.7497
GOTERM_CC_FAT	GO:0019866~organelle inner membrane	4	5.88235	0.072791	UGT1A10, ATAD3A, UGT1A9, HMGCS2, UGT1A7C, UGT1A6B, UGT1A2, UGT1A6A, UGT1A5, PDK4, UGT1A1	40	312	12504	4.00769	0.998801	0.457453	55.9746
UP_SEQ_FEATURE	repeat:2-2	2	2.94118	0.0741883	CALR3, CANX	57	22	16021	25.5518	1	0.888376	63.4005
UP_SEQ_FEATURE	repeat:2-1	2	2.94118	0.0741883	CALR3, CANX	57	22	16021	25.5518	1	0.888376	63.4005
GOTERM_CC_FAT	GO:0031982~vesicle	5	7.35294	0.0769726	P4HB, CAPG, HSPA5, CANX, SEC23B	40	519	12504	3.01156	0.999198	0.447912	58.0826
UP_SEQ_FEATURE	repeat:1-2	2	2.94118	0.0774288	CALR3, CANX	57	23	16021	24.4409	1	0.872944	65.0362
UP_SEQ_FEATURE	repeat:1-1	2	2.94118	0.0774288	CALR3, CANX	57	23	16021	24.4409	1	0.872944	65.0362
INTERPRO	IPR003095:Heat shock protein DnaJ	2	2.94118	0.0780436	DNAJB9, SEC63	61	24	17763	24.2664	0.999997	0.759856	62.4337
UP_SEQ_FEATURE	signal peptide	16	23.5294	0.0808695	P4HB, A2M, CRELD2, ADCYAP1R1, CECR5, CANX, UGT1A1, MANF, TAPBP, UGT1A10, UGT1A9, PTGDS, UGT1A7C, UGT1A2, UGT1A6B, SDF2L1, UGT1A5, UGT1A6A, IL15RA, CALR3, HSPA5, BAMBI, ADAM9	57	2963	16021	1.51776	1	0.859497	66.6988
GOTERM_BP_FAT	GO:0019884~antigen processing and presentation of exogenous antigen	2	2.94118	0.0850049	TAP2, TAPBP	44	28	13588	22.0584	1	0.963231	71.1514
GOTERM_CC_FAT	GO:0031967~organelle envelope	5	7.35294	0.0861966	UGT1A10, ATAD3A, UGT1A9, PTGDS, HMGCS2, UGT1A7C, UGT1A6B, UGT1A2, UGT1A6A, UGT1A5, PDK4, UGT1A1	40	540	12504	2.89444	0.999672	0.460499	62.4124
GOTERM_CC_FAT	GO:0031975~envelope	5	7.35294	0.0871028	UGT1A10, ATAD3A, UGT1A9, PTGDS, HMGCS2, UGT1A7C, UGT1A6B, UGT1A2, UGT1A6A, UGT1A5, PDK4, UGT1A1	40	542	12504	2.88376	0.9997	0.439731	62.815
GOTERM_BP_FAT	GO:0016126~sterol biosynthetic process	2	2.94118	0.0907989	HMGCS2, INSIG1	44	30	13588	20.5879	1	0.961006	73.6051
GOTERM_BP_FAT	GO:0008202~steroid metabolic process	3	4.41176	0.0919487	HMGCS2, SULT1A1, INSIG1	44	161	13588	5.75438	1	0.951906	74.0684
UP_SEQ_FEATURE	topological domain:Cytoplasmic	15	22.0588	0.094405	HIGD1C, IER3, BST2, ADCYAP1R1, CANX, SEC63, TAPBP, TAP2, INSIG1, IL15RA, ERAP1, GPR17, BAMBI, METTL7A2, PPAP2B, ADAM9	57	2780	16021	1.51657	1	0.879425	72.5562
KEGG_PATHWAY	mmu04910:Insulin signaling pathway	3	4.41176	0.0970336	PHKA2, EIF4EBP1, PHKA1	23	138	5738	5.42344	0.989879	0.899397	61.7069
GOTERM_BP_FAT	GO:0005977~glycogen metabolic process	2	2.94118	0.0994229	PHKA2, PHKA1	44	33	13588	18.7163	1	0.95308	76.9006
GOTERM_BP_FAT	GO:0006073~cellular glucan metabolic process	2	2.94118	0.0994229	PHKA2, PHKA1	44	33	13588	18.7163	1	0.95308	76.9006
GOTERM_BP_FAT	GO:0044042~glucan metabolic process	2	2.94118	0.0994229	PHKA2, PHKA1	44	33	13588	18.7163	1	0.95308	76.9006

## Sheet: Salmon
Category	Term	Count	%	PValue	Genes	List Total	Pop Hits	Pop Total	Fold Enrichment	Bonferroni	Benjamini	FDR
GOTERM_CC_FAT	GO:0005829~cytosol	8	12.3077	0.000578608	HBA-A1, XDH, NG23, HBA-A2, GPD1, CDKN1A, NFKBIA, HBB-B1, HBB-B2, SRXN1	35	549	12504	5.20593	0.0502068	0.0502068	0.626309
SP_PIR_KEYWORDS	metalloprotein	4	6.15385	0.000647273	HBA-A1, HBA-A2, HBB-B1, HBB-B2, ADA, SOD2	55	56	17854	23.187	0.0807276	0.0807276	0.751189
BIOCARTA	m_eponfkbPathway:Erythropoietin mediated neuroprotection through NF-kB	3	4.61538	0.00217971	CDKN1A, NFKBIA, SOD2	9	11	1171	35.4848	0.0694775	0.0694775	1.88662
INTERPRO	IPR000504:RNA recognition motif, RNP-1	5	7.69231	0.00274556	RBM4B, LARP7, TIA1, HNRNPA2B1, RBM28	50	212	17763	8.37877	0.366433	0.366433	3.28547
INTERPRO	IPR012677:Nucleotide-binding, alpha-beta plait	5	7.69231	0.00279248	RBM4B, LARP7, TIA1, HNRNPA2B1, RBM28	50	213	17763	8.33944	0.371362	0.207133	3.34075
UP_SEQ_FEATURE	domain:RRM 2	4	6.15385	0.00324487	RBM4B, TIA1, HNRNPA2B1, RBM28	55	88	16021	13.2405	0.54458	0.54458	4.11364
UP_SEQ_FEATURE	domain:RRM 1	4	6.15385	0.00324487	RBM4B, TIA1, HNRNPA2B1, RBM28	55	88	16021	13.2405	0.54458	0.54458	4.11364
SMART	SM00360:RRM	5	7.69231	0.00373433	RBM4B, LARP7, TIA1, HNRNPA2B1, RBM28	29	212	9131	7.42599	0.126011	0.126011	3.28193
SP_PIR_KEYWORDS	ubl conjugation	7	10.7692	0.00486362	CDKN1A, SGK1, CEBPB, HIF3A, ZFP410, NFKBIA, HIST1H4H	55	524	17854	4.3365	0.469435	0.271601	5.51957
GOTERM_MF_FAT	GO:0048037~cofactor binding	5	7.69231	0.0054978	XDH, GPD1, ALAS2, ILVBL, HPGD	43	226	13288	6.8368	0.503488	0.503488	6.19333
SP_PIR_KEYWORDS	cytoplasm	18	27.6923	0.00639391	HINT3, XDH, GPD1, SGK1, FKBP5, PNKD, HNRNPA2B1, NFKBIA, DDIT4, CDKN1A, CCND3, PLIN4, NT5C2, TSGA10, HIF3A, HPGD, MTMR4, SRXN1	55	3029	17854	1.92906	0.565638	0.242672	7.19774
GOTERM_BP_FAT	GO:0043066~negative regulation of apoptosis	5	7.69231	0.00672946	CDKN1A, CEBPB, ADA, SOD2, ANGPTL4	44	239	13588	6.46063	0.985695	0.985695	9.54964
GOTERM_BP_FAT	GO:0043069~negative regulation of programmed cell death	5	7.69231	0.00723155	CDKN1A, CEBPB, ADA, SOD2, ANGPTL4	44	244	13588	6.32824	0.989592	0.89798	10.2269
GOTERM_BP_FAT	GO:0060548~negative regulation of cell death	5	7.69231	0.00733487	CDKN1A, CEBPB, ADA, SOD2, ANGPTL4	44	245	13588	6.30241	0.990251	0.786378	10.3657
GOTERM_BP_FAT	GO:0030097~hemopoiesis	5	7.69231	0.00797538	HBA-A1, HBA-A2, ALAS2, HBB-B1, HBB-B2, ADA, SOD2	44	251	13588	6.15176	0.993504	0.716107	11.2216
GOTERM_BP_FAT	GO:0048534~hemopoietic or lymphoid organ development	5	7.69231	0.0117324	HBA-A1, HBA-A2, ALAS2, HBB-B1, HBB-B2, ADA, SOD2	44	281	13588	5.49499	0.999403	0.773422	16.0903
SP_PIR_KEYWORDS	nucleus	20	30.7692	0.0132704	HINT3, MAFF, SGK1, CEBPB, FKBP5, PNKD, HNRNPA2B1, ZFP560, NFKBIA, KLF15, CBX5, RBM4B, CDKN1A, CCND3, LARP7, HIF3A, ZFP410, TSGA10, RBM28, HIST1H4H	55	3808	17854	1.70493	0.8239	0.352201	14.4077
UP_SEQ_FEATURE	binding site:Substrate	5	7.69231	0.0137193	XDH, GPD1, HPGD, ADA, MTMR4	55	275	16021	5.2962	0.964672	0.812041	16.3512
GOTERM_BP_FAT	GO:0002520~immune system development	5	7.69231	0.0138195	HBA-A1, HBA-A2, ALAS2, HBB-B1, HBB-B2, ADA, SOD2	44	295	13588	5.23421	0.999842	0.767496	18.6862
GOTERM_MF_FAT	GO:0050662~coenzyme binding	4	6.15385	0.0139519	XDH, GPD1, ILVBL, HPGD	43	160	13288	7.72558	0.832097	0.59024	15.0358
GOTERM_MF_FAT	GO:0000166~nucleotide binding	14	21.5385	0.0143328	XDH, TUFM, GPD1, SGK1, EIF5, HNRNPA2B1, MAP3K6, RBM4B, TIA1, LARP7, NT5C2, RBM28, HPGD, SRXN1	43	2183	13288	1.98183	0.840137	0.457272	15.4157
SP_PIR_KEYWORDS	oxygen carrier	2	3.07692	0.0150331	HBA-A1, HBA-A2, HBB-B1, HBB-B2	55	5	17854	129.847	0.860424	0.325531	16.1715
PIR_SUPERFAMILY	PIRSF500045:hemoglobin, vertebrate type	2	3.07692	0.0176997	HBA-A1, HBA-A2, HBB-B1, HBB-B2	30	5	8136	108.48	0.536016	0.536016	15.3114
GOTERM_BP_FAT	GO:0070482~response to oxygen levels	3	4.61538	0.0179367	ALAS2, HIF3A, SOD2	44	65	13588	14.2531	0.999989	0.803358	23.5889
SP_PIR_KEYWORDS	blood	2	3.07692	0.018013	HBA-A1, HBA-A2, HBB-B1, HBB-B2	55	6	17854	108.206	0.905867	0.325538	19.0779
GOTERM_CC_FAT	GO:0005833~hemoglobin complex	2	3.07692	0.0215531	HBA-A1, HBA-A2, HBB-B1, HBB-B2	35	8	12504	89.3143	0.856181	0.620765	21.0633
SP_PIR_KEYWORDS	erythrocyte	2	3.07692	0.0239463	HBA-A1, HBA-A2, HBB-B1, HBB-B2	55	8	17854	81.1545	0.957186	0.362454	24.5922
SP_PIR_KEYWORDS	metal-binding	15	23.0769	0.0256601	XDH, PNKD, ZFP560, KLF15, ADA, SOD2, HBA-A1, MAP3K6, RBM4B, HBA-A2, CDKN1A, NT5C2, ZFP410, ILVBL, HBB-B1, HBB-B2, MTMR4	55	2682	17854	1.81554	0.965931	0.344541	26.1198
UP_SEQ_FEATURE	metal ion-binding site:Iron (heme distal ligand)	2	3.07692	0.0266544	HBA-A1, HBA-A2, HBB-B1, HBB-B2	55	8	16021	72.8227	0.998552	0.886879	29.4726
PIR_SUPERFAMILY	PIRSF036518:globin	2	3.07692	0.028174	HBA-A1, HBA-A2, HBB-B1, HBB-B2	30	8	8136	67.8	0.707379	0.459055	23.3523
INTERPRO	IPR000971:Globin, subset	2	3.07692	0.0299372	HBA-A1, HBA-A2, HBB-B1, HBB-B2	50	11	17763	64.5927	0.993562	0.813966	30.8793
INTERPRO	IPR012292:Globin	2	3.07692	0.0299372	HBA-A1, HBA-A2, HBB-B1, HBB-B2	50	11	17763	64.5927	0.993562	0.813966	30.8793
GOTERM_CC_FAT	GO:0070013~intracellular organelle lumen	8	12.3077	0.0301942	RBM4B, MRPL41, ALAS2, LARP7, HNRNPA2B1, RBM28, SOD2, CBX5	35	1133	12504	2.52256	0.934695	0.5973	28.3099
GOTERM_CC_FAT	GO:0043233~organelle lumen	8	12.3077	0.0305795	RBM4B, MRPL41, ALAS2, LARP7, HNRNPA2B1, RBM28, SOD2, CBX5	35	1136	12504	2.5159	0.936965	0.498933	28.6185
SP_PIR_KEYWORDS	oxygen transport	2	3.07692	0.0327803	HBA-A1, HBA-A2, HBB-B1, HBB-B2	55	11	17854	59.0215	0.98687	0.382099	32.1682
GOTERM_MF_FAT	GO:0005344~oxygen transporter activity	2	3.07692	0.0342366	HBA-A1, HBA-A2, HBB-B1, HBB-B2	43	11	13288	56.186	0.988016	0.669139	33.2356
GOTERM_BP_FAT	GO:0015671~oxygen transport	2	3.07692	0.0342769	HBA-A1, HBA-A2, HBB-B1, HBB-B2	44	11	13588	56.1488	1	0.935578	40.4558
GOTERM_CC_FAT	GO:0031974~membrane-enclosed lumen	8	12.3077	0.0357576	RBM4B, MRPL41, ALAS2, LARP7, HNRNPA2B1, RBM28, SOD2, CBX5	35	1174	12504	2.43446	0.960864	0.476984	32.6501
UP_SEQ_FEATURE	metal ion-binding site:Iron (heme proximal ligand)	2	3.07692	0.036469	HBA-A1, HBA-A2, HBB-B1, HBB-B2	55	11	16021	52.962	0.999875	0.894349	38.131
GOTERM_BP_FAT	GO:0015669~gas transport	2	3.07692	0.0403846	HBA-A1, HBA-A2, HBB-B1, HBB-B2	44	13	13588	47.5105	1	0.943922	45.8147
GOTERM_MF_FAT	GO:0019825~oxygen binding	2	3.07692	0.0433735	HBA-A1, HBA-A2, HBB-B1, HBB-B2	43	14	13288	44.1462	0.996417	0.675767	40.2045
SP_PIR_KEYWORDS	isopeptide bond	4	6.15385	0.0513569	CEBPB, HIF3A, NFKBIA, HIST1H4H	55	277	17854	4.68763	0.998945	0.496109	45.8808
GOTERM_BP_FAT	GO:0001701~in utero embryonic development	4	6.15385	0.0520513	HBA-A1, MAFF, HBA-A2, CEBPB, ADA	44	267	13588	4.62649	1	0.965345	54.8232
GOTERM_BP_FAT	GO:0006915~apoptosis	5	7.69231	0.0585637	SGK1, MRPL41, TIA1, DDIT4, SOD2	44	465	13588	3.32063	1	0.968281	59.2233
SP_PIR_KEYWORDS	rna-binding	5	7.69231	0.0587044	RBM4B, LARP7, TIA1, HNRNPA2B1, RBM28	55	485	17854	3.34658	0.999616	0.510797	50.5659
SP_PIR_KEYWORDS	nucleotide metabolism	2	3.07692	0.0588141	NT5C2, ADA	55	20	17854	32.4618	0.999622	0.481419	50.6329
GOTERM_BP_FAT	GO:0012501~programmed cell death	5	7.69231	0.0615974	SGK1, MRPL41, TIA1, DDIT4, SOD2	44	473	13588	3.26446	1	0.964295	61.1335
GOTERM_BP_FAT	GO:0044092~negative regulation of molecular function	3	4.61538	0.0653202	CDKN1A, NFKBIA, ANGPTL4	44	132	13588	7.0186	1	0.961934	63.3635
UP_SEQ_FEATURE	region of interest:Substrate binding	3	4.61538	0.0664547	GPD1, NT5C2, MTMR4	55	125	16021	6.99098	1	0.964145	58.8836
GOTERM_BP_FAT	GO:0030890~positive regulation of B cell proliferation	2	3.07692	0.0674054	CDKN1A, ADA	44	22	13588	28.0744	1	0.956514	64.5598
GOTERM_MF_FAT	GO:0051059~NF-kappaB binding	2	3.07692	0.0702809	NG23, NFKBIA	43	23	13288	26.8716	0.999904	0.786148	57.049
GOTERM_CC_FAT	GO:0005759~mitochondrial matrix	3	4.61538	0.0722305	MRPL41, ALAS2, SOD2	35	163	12504	6.57528	0.998735	0.671127	55.6849
GOTERM_CC_FAT	GO:0031980~mitochondrial lumen	3	4.61538	0.0722305	MRPL41, ALAS2, SOD2	35	163	12504	6.57528	0.998735	0.671127	55.6849
GOTERM_BP_FAT	GO:0008219~cell death	5	7.69231	0.0754133	SGK1, MRPL41, TIA1, DDIT4, SOD2	44	507	13588	3.04554	1	0.962669	68.8237
UP_SEQ_FEATURE	binding site:Substrate; via amide nitrogen	2	3.07692	0.0778882	XDH, ADA	55	24	16021	24.2742	1	0.962016	64.9372
GOTERM_BP_FAT	GO:0016265~death	5	7.69231	0.0806404	SGK1, MRPL41, TIA1, DDIT4, SOD2	44	519	13588	2.97513	1	0.963312	71.3434
SP_PIR_KEYWORDS	Apoptosis	4	6.15385	0.0818319	SGK1, MRPL41, TIA1, DDIT4	55	337	17854	3.85303	0.999985	0.574184	62.9992
KEGG_PATHWAY	mmu00230:Purine metabolism	3	4.61538	0.0855183	XDH, NT5C2, ADA	19	157	5738	5.7707	0.982099	0.982099	56.8603
GOTERM_BP_FAT	GO:0046148~pigment biosynthetic process	2	3.07692	0.0907989	ALAS2, ADA	44	30	13588	20.5879	1	0.97046	75.7062
SP_PIR_KEYWORDS	nad	3	4.61538	0.0926526	XDH, GPD1, HPGD	55	169	17854	5.76245	0.999997	0.594587	67.7706
SP_PIR_KEYWORDS	oxidoreductase	5	7.69231	0.0942402	XDH, GPD1, HPGD, SRXN1, SOD2	55	572	17854	2.83757	0.999997	0.575921	68.4212
UP_SEQ_FEATURE	DNA-binding region:Basic motif	3	4.61538	0.0950614	MAFF, CEBPB, HIF3A	55	154	16021	5.6745	1	0.968358	72.5005
GOTERM_BP_FAT	GO:0042981~regulation of apoptosis	5	7.69231	0.0964139	CDKN1A, CEBPB, ADA, SOD2, ANGPTL4	44	553	13588	2.79221	1	0.971068	77.8434
GOTERM_BP_FAT	GO:0030888~regulation of B cell proliferation	2	3.07692	0.0965572	CDKN1A, ADA	44	32	13588	19.3011	1	0.96532	77.8955
GOTERM_BP_FAT	GO:0043067~regulation of programmed cell death	5	7.69231	0.0998337	CDKN1A, CEBPB, ADA, SOD2, ANGPTL4	44	560	13588	2.75731	1	0.963403	79.0577

## Sheet: Red
Category	Term	Count	%	PValue	Genes	List Total	Pop Hits	Pop Total	Fold Enrichment	Bonferroni	Benjamini	FDR
GOTERM_BP_FAT	GO:0008380~RNA splicing	9	3.76569	0.00190208	TDRD3, PRPF4B, DDX46, BAT1A, RNPS1, LSM10, TSEN2, PRPF4, 1110037F02RIK	153	201	13588	3.97659	0.857938	0.857938	2.97249
GOTERM_BP_FAT	GO:0045892~negative regulation of transcription, DNA-dependent	11	4.60251	0.00243943	PA2G4, DNMT1, TLE1, MAF1, BCOR, MBD2, NFIC, CBFA2T2, NSD1, NRIP1, HNRNPAB	153	308	13588	3.1718	0.9182	0.713992	3.79712
GOTERM_BP_FAT	GO:0051253~negative regulation of RNA metabolic process	11	4.60251	0.00255628	PA2G4, DNMT1, TLE1, MAF1, BCOR, MBD2, NFIC, CBFA2T2, NSD1, NRIP1, HNRNPAB	153	310	13588	3.15134	0.927454	0.582935	3.97556
GOTERM_BP_FAT	GO:0006397~mRNA processing	10	4.1841	0.00274648	TDRD3, PRPF4B, DDX46, BAT1A, RNPS1, LSM10, TSEN2, PRPF4, 1110037F02RIK, RNGTT	153	262	13588	3.38971	0.940335	0.505769	4.26536
GOTERM_BP_FAT	GO:0006396~RNA processing	13	5.43933	0.00369633	TDRD3, PRPF4B, UTP18, RNPS1, PRPF4, RNGTT, PA2G4, DDX46, BAT1A, LSM10, TSEN2, DUS2L, 1110037F02RIK	153	437	13588	2.64196	0.977534	0.531936	5.7004
GOTERM_BP_FAT	GO:0016071~mRNA metabolic process	10	4.1841	0.00690758	TDRD3, PRPF4B, DDX46, BAT1A, RNPS1, LSM10, TSEN2, PRPF4, 1110037F02RIK, RNGTT	153	302	13588	2.94074	0.999179	0.69399	10.4041
GOTERM_BP_FAT	GO:0043414~biopolymer methylation	5	2.09205	0.00818775	GSPT1, DNMT1, ETF1, NSD1, SUV420H1	153	71	13588	6.25426	0.999781	0.699965	12.2173
GOTERM_BP_FAT	GO:0016481~negative regulation of transcription	11	4.60251	0.00904129	PA2G4, DNMT1, TLE1, MAF1, BCOR, MBD2, NFIC, CBFA2T2, NSD1, NRIP1, HNRNPAB	153	372	13588	2.62612	0.999909	0.687666	13.407
GOTERM_BP_FAT	GO:0006508~proteolysis	21	8.78661	0.011304	AGBL3, MASP1, ANAPC5, PM20D2, USP9X, MMP14, ATE1, ARIH1, CTSL, PIGK, USP53, SENP1, PSMB6, PAPPA, MAP1LC3B, CPXM1, FBXO30, FBXO42, CPA1, PLAU, ASB7	153	1034	13588	1.80369	0.999991	0.726029	16.4882
GOTERM_BP_FAT	GO:0032259~methylation	5	2.09205	0.0118244	GSPT1, DNMT1, ETF1, NSD1, SUV420H1	153	79	13588	5.62092	0.999995	0.704541	17.1822
GOTERM_BP_FAT	GO:0006479~protein amino acid methylation	4	1.67364	0.0122132	GSPT1, ETF1, NSD1, SUV420H1	153	43	13588	8.26144	0.999997	0.681795	17.6972
GOTERM_BP_FAT	GO:0008213~protein amino acid alkylation	4	1.67364	0.0122132	GSPT1, ETF1, NSD1, SUV420H1	153	43	13588	8.26144	0.999997	0.681795	17.6972
GOTERM_BP_FAT	GO:0045934~negative regulation of nucleobase, nucleoside, nucleotide and nucleic acid metabolic process	11	4.60251	0.013805	PA2G4, DNMT1, TLE1, MAF1, BCOR, MBD2, NFIC, CBFA2T2, NSD1, NRIP1, HNRNPAB	153	397	13588	2.46074	0.999999	0.694984	19.7742
GOTERM_BP_FAT	GO:0051172~negative regulation of nitrogen compound metabolic process	11	4.60251	0.0147153	PA2G4, DNMT1, TLE1, MAF1, BCOR, MBD2, NFIC, CBFA2T2, NSD1, NRIP1, HNRNPAB	153	401	13588	2.4362	1	0.68928	20.9399
GOTERM_BP_FAT	GO:0010629~negative regulation of gene expression	11	4.60251	0.0169272	PA2G4, DNMT1, TLE1, MAF1, BCOR, MBD2, NFIC, CBFA2T2, NSD1, NRIP1, HNRNPAB	153	410	13588	2.38272	1	0.713472	23.7065
GOTERM_BP_FAT	GO:0006497~protein amino acid lipidation	4	1.67364	0.0183311	PIGK, PIGM, PIGG, CD4	153	50	13588	7.10484	1	0.717548	25.4152
GOTERM_BP_FAT	GO:0010558~negative regulation of macromolecule biosynthetic process	11	4.60251	0.0190927	PA2G4, DNMT1, TLE1, MAF1, BCOR, MBD2, NFIC, CBFA2T2, NSD1, NRIP1, HNRNPAB	153	418	13588	2.33712	1	0.709152	26.3271
GOTERM_BP_FAT	GO:0045058~T cell selection	3	1.25523	0.0227136	CD4, SYKB, CD1D1	153	21	13588	12.6872	1	0.749748	30.5212
GOTERM_BP_FAT	GO:0031327~negative regulation of cellular biosynthetic process	11	4.60251	0.0227149	PA2G4, DNMT1, TLE1, MAF1, BCOR, MBD2, NFIC, CBFA2T2, NSD1, NRIP1, HNRNPAB	153	430	13588	2.2719	1	0.729749	30.5227
GOTERM_BP_FAT	GO:0048285~organelle fission	7	2.92887	0.023385	MAD1L1, ANAPC5, SAC3D1, KATNA1, USP9X, AHCTF1, PEX11C	153	197	13588	3.1557	1	0.721	31.2739
GOTERM_BP_FAT	GO:0042158~lipoprotein biosynthetic process	4	1.67364	0.0235688	PIGK, PIGM, PIGG, CD4	153	55	13588	6.45894	1	0.705467	31.4787
GOTERM_BP_FAT	GO:0009890~negative regulation of biosynthetic process	11	4.60251	0.0240266	PA2G4, DNMT1, TLE1, MAF1, BCOR, MBD2, NFIC, CBFA2T2, NSD1, NRIP1, HNRNPAB	153	434	13588	2.25096	1	0.694879	31.9861
GOTERM_BP_FAT	GO:0010605~negative regulation of macromolecule metabolic process	12	5.02092	0.0267637	PA2G4, DNMT1, TLE1, MAF1, BCOR, MBD2, NFIC, CBFA2T2, NSD1, YWHAE, NRIP1, HNRNPAB	153	506	13588	2.10618	1	0.71746	34.9471
GOTERM_BP_FAT	GO:0045017~glycerolipid biosynthetic process	4	1.67364	0.0270605	PIGK, PIGM, PIGG, PNPLA3	153	58	13588	6.12486	1	0.705528	35.2608
GOTERM_BP_FAT	GO:0009057~macromolecule catabolic process	14	5.85774	0.0317952	ANAPC5, USP9X, PGLYRP1, RNPS1, ATE1, ARIH1, USP53, PSMB6, SENP1, MAP1LC3B, FBXO30, FBXO42, CTBS, ASB7	153	654	13588	1.90114	1	0.748416	40.0777
GOTERM_BP_FAT	GO:0051276~chromosome organization	10	4.1841	0.0378175	HMGN1, MEAF6, HIST1H2BP, NBN, FAM175A, DNMT1, BCOR, NSD1, TERF2, SUV420H1	153	404	13588	2.19828	1	0.794147	45.7199
GOTERM_BP_FAT	GO:0051301~cell division	8	3.34728	0.0386359	MAD1L1, ROCK1, ANAPC5, SAC3D1, KATNA1, USP9X, CCNT1, AHCTF1	153	281	13588	2.52841	1	0.788462	46.4471
GOTERM_BP_FAT	GO:0006730~one-carbon metabolic process	5	2.09205	0.0422857	GSPT1, DNMT1, ETF1, NSD1, SUV420H1	153	117	13588	3.79532	1	0.806062	49.5802
GOTERM_BP_FAT	GO:0006506~GPI anchor biosynthetic process	3	1.25523	0.0440831	PIGK, PIGM, PIGG	153	30	13588	8.88105	1	0.808028	51.0593
GOTERM_BP_FAT	GO:0046489~phosphoinositide biosynthetic process	3	1.25523	0.0467851	PIGK, PIGM, PIGG	153	31	13588	8.59456	1	0.816133	53.2064
GOTERM_BP_FAT	GO:0006505~GPI anchor metabolic process	3	1.25523	0.0495463	PIGK, PIGM, PIGG	153	32	13588	8.32598	1	0.823813	55.3092
GOTERM_BP_FAT	GO:0042157~lipoprotein metabolic process	4	1.67364	0.0534032	PIGK, PIGM, PIGG, CD4	153	76	13588	4.67423	1	0.837105	58.0985
GOTERM_BP_FAT	GO:0006457~protein folding	5	2.09205	0.0542027	CCT7, HSPH1, DNAJC14, HSPA4L, QSOX1	153	127	13588	3.49647	1	0.832204	58.656
GOTERM_BP_FAT	GO:0000280~nuclear division	6	2.51046	0.0622827	MAD1L1, ANAPC5, SAC3D1, KATNA1, USP9X, AHCTF1	153	190	13588	2.80454	1	0.864313	63.9126
GOTERM_BP_FAT	GO:0007067~mitosis	6	2.51046	0.0622827	MAD1L1, ANAPC5, SAC3D1, KATNA1, USP9X, AHCTF1	153	190	13588	2.80454	1	0.864313	63.9126
GOTERM_BP_FAT	GO:0009628~response to abiotic stimulus	7	2.92887	0.0629207	HMGN1, ADRB3, TRP53BP2, GNB1, FAM175A, FANCG, MMP14	153	251	13588	2.47679	1	0.859026	64.2998
GOTERM_BP_FAT	GO:0006325~chromatin organization	8	3.34728	0.0637719	HMGN1, MEAF6, HIST1H2BP, FAM175A, DNMT1, BCOR, NSD1, SUV420H1	153	315	13588	2.2555	1	0.854825	64.8103
GOTERM_BP_FAT	GO:0000087~M phase of mitotic cell cycle	6	2.51046	0.0668332	MAD1L1, ANAPC5, SAC3D1, KATNA1, USP9X, AHCTF1	153	194	13588	2.74672	1	0.860468	66.5904
GOTERM_BP_FAT	GO:0009314~response to radiation	5	2.09205	0.0766487	HMGN1, TRP53BP2, GNB1, FAM175A, FANCG	153	143	13588	3.10526	1	0.890208	71.7456
GOTERM_BP_FAT	GO:0051603~proteolysis involved in cellular protein catabolic process	11	4.60251	0.0768485	ARIH1, USP53, SENP1, PSMB6, ANAPC5, MAP1LC3B, USP9X, FBXO30, FBXO42, ASB7, ATE1	153	534	13588	1.82943	1	0.884313	71.8424
GOTERM_BP_FAT	GO:0044257~cellular protein catabolic process	11	4.60251	0.0790903	ARIH1, USP53, SENP1, PSMB6, ANAPC5, MAP1LC3B, USP9X, FBXO30, FBXO42, ASB7, ATE1	153	537	13588	1.81921	1	0.885304	72.9068
GOTERM_BP_FAT	GO:0008104~protein localization	14	5.85774	0.0792435	RAB8A, TIMM17A, AHCTF1, YWHAE, WDR92, SCFD1, PLEKHA8, DNAJC14, KATNA1, ARCN1, EXOC4, CD4, TPR, NMD3	153	753	13588	1.65119	1	0.879438	72.9781
GOTERM_BP_FAT	GO:0044265~cellular macromolecule catabolic process	12	5.02092	0.0798215	ARIH1, USP53, SENP1, PSMB6, ANAPC5, MAP1LC3B, USP9X, FBXO30, RNPS1, FBXO42, ASB7, ATE1	153	609	13588	1.74996	1	0.875031	73.2457
GOTERM_BP_FAT	GO:0046474~glycerophospholipid biosynthetic process	3	1.25523	0.0935475	PIGK, PIGM, PIGG	153	46	13588	5.79199	1	0.909005	78.9165
GOTERM_BP_FAT	GO:0030163~protein catabolic process	11	4.60251	0.0942297	ARIH1, USP53, SENP1, PSMB6, ANAPC5, MAP1LC3B, USP9X, FBXO30, FBXO42, ASB7, ATE1	153	556	13588	1.75704	1	0.9055	79.1666
GOTERM_BP_FAT	GO:0022602~ovulation cycle process	3	1.25523	0.0970147	FANCG, MMP14, NRIP1	153	47	13588	5.66875	1	0.907197	80.159
GOTERM_BP_FAT	GO:0000279~M phase	7	2.92887	0.0982148	MAD1L1, NBN, ANAPC5, SAC3D1, KATNA1, USP9X, AHCTF1	153	283	13588	2.19673	1	0.905082	80.5728
GOTERM_CC_FAT	GO:0031090~organelle membrane	21	8.78661	0.000961145	ACOX1, B3GALT1, TIMM17A, NDUFC2, ERLIN2, PEX11C, LETM2, CD1D1, SLC35A3, NDUFB2, PIGK, SLC17A5, PIGM, SCYL2, NCK1, SLC25A38, CD4, GOLGA5, QSOX1, HMGCL, SLC25A17	145	809	12504	2.23847	0.182854	0.182854	1.20755
GOTERM_CC_FAT	GO:0042579~microbody	6	2.51046	0.00698303	PECR, ACOX1, EHHADH, PEX11C, SERHL, SLC25A17	145	104	12504	4.97507	0.770438	0.520873	8.47275
GOTERM_CC_FAT	GO:0005777~peroxisome	6	2.51046	0.00698303	PECR, ACOX1, EHHADH, PEX11C, SERHL, SLC25A17	145	104	12504	4.97507	0.770438	0.520873	8.47275
GOTERM_CC_FAT	GO:0005739~mitochondrion	25	10.4603	0.0160925	ACOX1, 1810049H13RIK, MCL1, 4930455C21RIK, TIMM17A, EHHADH, LETM2, NDUFB2, PECR, HMGCL, 1110020G09RIK, SSBP1, LYRM7, MRPS25, GRSF1, NDUFC2, SERHL, YWHAE, CCT7, SLC25A38, COQ10B, 5033411D12RIK, A830080D01RIK, DUS2L, SLC25A17	145	1322	12504	1.63076	0.966857	0.678783	18.5326
GOTERM_CC_FAT	GO:0012505~endomembrane system	13	5.43933	0.0206645	MAD1L1, B3GALT1, AHCTF1, ERLIN2, SLC35A3, PIGK, PIGM, NCK1, RC3H2, CD4, TPR, GOLGA5, QSOX1	145	535	12504	2.09542	0.987537	0.665878	23.1881
GOTERM_CC_FAT	GO:0048471~perinuclear region of cytoplasm	7	2.92887	0.0220934	CISD2, TRP53BP2, SCYL2, ATXN10, SERBP1, RC3H2, SERHL	145	189	12504	3.19387	0.990828	0.608718	24.5922
GOTERM_CC_FAT	GO:0005694~chromosome	10	4.1841	0.0307276	HMGN1, MAD1L1, HIST1H2BP, NBN, PRPF4B, DNMT1, AHCTF1, MBD2, TERF2, SUV420H1	145	378	12504	2.28134	0.998576	0.664567	32.585
GOTERM_CC_FAT	GO:0044427~chromosomal part	9	3.76569	0.0307525	HMGN1, MAD1L1, HIST1H2BP, NBN, DNMT1, AHCTF1, MBD2, TERF2, SUV420H1	145	318	12504	2.4406	0.998583	0.608222	32.607
GOTERM_CC_FAT	GO:0031903~microbody membrane	3	1.25523	0.0357374	ACOX1, PEX11C, SLC25A17	145	26	12504	9.95013	0.99952	0.615295	36.8573
GOTERM_CC_FAT	GO:0005778~peroxisomal membrane	3	1.25523	0.0357374	ACOX1, PEX11C, SLC25A17	145	26	12504	9.95013	0.99952	0.615295	36.8573
GOTERM_CC_FAT	GO:0031981~nuclear lumen	17	7.11297	0.0473133	MEAF6, MCL1, UTP18, AHCTF1, TLE1, RNPS1, MBD2, PRPF4, NRIP1, PA2G4, DDX46, LSM10, BRD4, PSME4, TSEN2, NSD1, NMD3	145	883	12504	1.66023	0.999962	0.677273	45.7931
GOTERM_CC_FAT	GO:0044438~microbody part	3	1.25523	0.0492698	ACOX1, PEX11C, SLC25A17	145	31	12504	8.34527	0.999975	0.653899	47.1829
GOTERM_CC_FAT	GO:0044439~peroxisomal part	3	1.25523	0.0492698	ACOX1, PEX11C, SLC25A17	145	31	12504	8.34527	0.999975	0.653899	47.1829
GOTERM_CC_FAT	GO:0070013~intracellular organelle lumen	20	8.3682	0.061288	MEAF6, MCL1, UTP18, MRPS25, AHCTF1, TLE1, RNPS1, MBD2, PRPF4, NRIP1, PA2G4, DDX46, CD4, LSM10, PSME4, BRD4, TSEN2, NSD1, HMGCL, NMD3	145	1133	12504	1.52223	0.999998	0.701037	55.0249
GOTERM_CC_FAT	GO:0043233~organelle lumen	20	8.3682	0.0625958	MEAF6, MCL1, UTP18, MRPS25, AHCTF1, TLE1, RNPS1, MBD2, PRPF4, NRIP1, PA2G4, DDX46, CD4, LSM10, PSME4, BRD4, TSEN2, NSD1, HMGCL, NMD3	145	1136	12504	1.51821	0.999999	0.677358	55.8101
GOTERM_CC_FAT	GO:0031974~membrane-enclosed lumen	20	8.3682	0.0808754	MEAF6, MCL1, UTP18, MRPS25, AHCTF1, TLE1, RNPS1, MBD2, PRPF4, NRIP1, PA2G4, DDX46, CD4, LSM10, PSME4, BRD4, TSEN2, NSD1, HMGCL, NMD3	145	1174	12504	1.46907	1	0.743932	65.5436
GOTERM_CC_FAT	GO:0016604~nuclear body	5	2.09205	0.0813554	DDX46, RNPS1, LSM10, PSME4, PRPF4	145	142	12504	3.03643	1	0.719965	65.7702
GOTERM_CC_FAT	GO:0005654~nucleoplasm	12	5.02092	0.0850765	MEAF6, DDX46, MCL1, TLE1, RNPS1, LSM10, PSME4, MBD2, NSD1, PRPF4, NRIP1, NMD3	145	599	12504	1.72757	1	0.712004	67.4813
GOTERM_CC_FAT	GO:0016607~nuclear speck	4	1.67364	0.0853919	DDX46, RNPS1, PSME4, PRPF4	145	90	12504	3.83264	1	0.690108	67.6227
GOTERM_MF_FAT	GO:0003714~transcription corepressor activity	5	2.09205	0.0076991	TLE1, BCOR, CBFA2T2, NSD1, NRIP1	145	72	13288	6.36398	0.916982	0.916982	9.91309
GOTERM_MF_FAT	GO:0004181~metallocarboxypeptidase activity	3	1.25523	0.0233785	AGBL3, CPXM1, CPA1	145	22	13288	12.4966	0.999508	0.977821	27.3507
GOTERM_MF_FAT	GO:0003723~RNA binding	14	5.85774	0.0306244	TDRD3, CCNT1, GRSF1, RNPS1, MBD2, PA2G4, DDX46, SERBP1, BAT1A, LSM10, PUM2, DUS2L, RBM12, HNRNPAB	145	672	13288	1.9092	0.999955	0.964506	34.3029
GOTERM_MF_FAT	GO:0070011~peptidase activity, acting on L-amino acid peptides	13	5.43933	0.0308281	AGBL3, MASP1, USP9X, PM20D2, MMP14, CTSL, PIGK, PSMB6, SENP1, PAPPA, CPXM1, CPA1, PLAU	145	603	13288	1.97568	0.999958	0.919598	34.4891
GOTERM_MF_FAT	GO:0042799~histone methyltransferase activity (H4-K20 specific)	2	0.83682	0.0321619	NSD1, SUV420H1	145	3	13288	61.0943	0.999973	0.878187	35.6964
GOTERM_MF_FAT	GO:0008233~peptidase activity	13	5.43933	0.0405528	AGBL3, MASP1, USP9X, PM20D2, MMP14, CTSL, PIGK, PSMB6, SENP1, PAPPA, CPXM1, CPA1, PLAU	145	629	13288	1.89402	0.999998	0.891575	42.8316
GOTERM_MF_FAT	GO:0008235~metalloexopeptidase activity	3	1.25523	0.0494781	AGBL3, CPXM1, CPA1	145	33	13288	8.33103	1	0.903115	49.6116
GOTERM_MF_FAT	GO:0008237~metallopeptidase activity	6	2.51046	0.0527901	AGBL3, PAPPA, PM20D2, CPXM1, CPA1, MMP14	145	187	13288	2.94037	1	0.887291	51.9321
GOTERM_MF_FAT	GO:0004180~carboxypeptidase activity	3	1.25523	0.0549863	AGBL3, CPXM1, CPA1	145	35	13288	7.85498	1	0.8678	53.4158
GOTERM_MF_FAT	GO:0019904~protein domain specific binding	6	2.51046	0.0578479	TRP53BP2, SLC22A12, NCK1, PLSCR3, EXOC4, YWHAE	145	192	13288	2.86379	1	0.85321	55.2855
GOTERM_MF_FAT	GO:0003747~translation release factor activity	2	0.83682	0.0632963	GSPT1, ETF1	145	6	13288	30.5471	1	0.852525	58.6546
GOTERM_MF_FAT	GO:0017069~snRNA binding	2	0.83682	0.0632963	CCNT1, LSM10	145	6	13288	30.5471	1	0.852525	58.6546
GOTERM_MF_FAT	GO:0008079~translation termination factor activity	2	0.83682	0.0632963	GSPT1, ETF1	145	6	13288	30.5471	1	0.852525	58.6546
GOTERM_MF_FAT	GO:0016564~transcription repressor activity	6	2.51046	0.079515	DNMT1, TLE1, BCOR, CBFA2T2, NSD1, NRIP1	145	211	13288	2.60592	1	0.891745	67.3436
GOTERM_MF_FAT	GO:0008134~transcription factor binding	7	2.92887	0.0932385	NBN, DNMT1, TLE1, BCOR, CBFA2T2, NSD1, NRIP1	145	288	13288	2.22739	1	0.911461	73.3405
INTERPRO	IPR000834:Peptidase M14, carboxypeptidase A	3	1.25523	0.0327868	AGBL3, CPXM1, CPA1	196	26	17763	10.457	1	1	37.8482
KEGG_PATHWAY	mmu00563:Glycosylphosphatidylinositol(GPI)-anchor biosynthesis	3	1.25523	0.0181883	PIGK, PIGM, PIGG	49	25	5738	14.0522	0.789914	0.789914	17.9207
KEGG_PATHWAY	mmu03440:Homologous recombination	3	1.25523	0.0210563	NBN, SSBP1, RAD51L3	49	27	5738	13.0113	0.836166	0.595236	20.4638
KEGG_PATHWAY	mmu00310:Lysine degradation	3	1.25523	0.0456952	EHHADH, NSD1, SUV420H1	49	41	5738	8.56844	0.981233	0.734253	39.5413
SMART	SM00631:Zn_pept	3	1.25523	0.0368285	AGBL3, CPXM1, CPA1	108	26	9131	9.75534	0.982622	0.982622	34.4606
SP_PIR_KEYWORDS	cytoplasm	56	23.431	0.000160413	HMGN1, MAD1L1, ILKAP, PGLYRP1, HSPH1, TRIM2, NISCH, MAP1LC3B, ATXN10, NT5C2, RC3H2, CYGB, MTAP6, PUM2, ZFAT, GOLGA4, API5, ROCK1, ARHGEF18, LRP2BP, TLE1, PA2G4, SENP1, SCYL2, SERBP1, ARCN1, DUS2L, TDRD3, NKD2, MCL1, USP9X, AHCTF1, ARIH1, PSMB6, TRP53BP2, SAC3D1, KATNA1, HNRNPAB, NMD3, AGBL3, TRIM29, GRSF1, PTPN14, SERHL, RNPS1, ETF1, YWHAE, ATE1, CCT7, SCFD1, PLEKHA8, EPB4.2, HSPA4L, DNMT1, 57304…	203	3029	17854	1.62603	0.0373071	0.0373071	0.206443
SP_PIR_KEYWORDS	alternative splicing	75	31.3808	0.000168466	POU6F1, MAD1L1, KCNC1, ILKAP, 0610007C21RIK, MASP1, FAM175A, PEX11C, CBFA2T2, FAM168A, HSPH1, GABPB1, HIST1H2BP, NISCH, PAPPA, MTAP6, ZFAT, MASTL, PUM2, BRD4, CTBS, D3ERTD751E, PQLC2, 4931408A02RIK, ANAPC5, BRAF, ROCK1, ARHGEF18, TTC38, LRP2BP, TLE1, MBD2, TCTE3, PITPNM3, SCYL2, SERBP1, MORC2B, PSME4, TREM2, 1110037F02RIK, SUV420H1, IQCB1, LRRIQ3, MEAF6, TDRD3, NKD2, PTCHD2, ZFP618, ADRB3, DDX46,…	203	4481	17854	1.47206	0.0391431	0.0197669	0.216797
SP_PIR_KEYWORDS	acetylation	45	18.8285	0.000365259	HMGN1, MAD1L1, MEAF6, ACOX1, ILKAP, PRPF4B, EHHADH, CCNT1, AHCTF1, ZFP618, HIST1H2BP, FAM168A, CISD2, NISCH, PSMB6, DDX46, EXOC4, BAT1A, PUM2, BRD4, BCOR, API5, HMGCL, GTF3C4, TERF2, HNRNPAB, NMD3, ROCK1, BRAF, SSBP1, BC055324, RNPS1, ETF1, PRPF4, YWHAE, NRIP1, CHRAC1, CCT7, PA2G4, GNB1, SERBP1, ARCN1, HSPA4L, DNMT1, 1110037F02RIK	203	2325	17854	1.70227	0.0829399	0.0284483	0.469499
SP_PIR_KEYWORDS	phosphoprotein	96	40.1674	0.000388566	HMGN1, ACOX1, KCNC1, MAD1L1, NBN, ZBTB33, PRPF4B, UTP18, FAM175A, CCNT1, WWC1, MAF1, CBFA2T2, RNGTT, FAM168A, HSPH1, HIST1H2BP, PECR, TRIM2, NISCH, NT5C2, BAT1A, RC3H2, MTAP6, MASTL, PUM2, BRD4, GOLGA5, TSEN2, GOLGA4, RBM12, API5, 4931408A02RIK, SSBP1, ROCK1, ANAPC5, BRAF, ARHGEF18, KIF5C, LRP2BP, TLE1, MBD2, NRIP1, CHRAC1, PA2G4, PITPNM3, SENP1, SCYL2, CCDC55, SERBP1, ROR1, PSME4, NSD1, 1110037F…	203	6311	17854	1.33787	0.0879933	0.0227639	0.499387
SP_PIR_KEYWORDS	nucleus	61	25.523	0.00306439	HMGN1, MAD1L1, POU6F1, NBN, ZBTB33, PRPF4B, FAM175A, UTP18, CCNT1, GM13139, ZFP84, MAF1, CBFA2T2, RNGTT, HSPH1, HIST1H2BP, GABPB1, BAT1A, ZFAT, BRD4, FANCG, TSEN2, API5, RBM12, NKX2-6, TLE1, MBD2, PRPF4, NRIP1, CHRAC1, ZFP160, PA2G4, SENP1, SERBP1, PSME4, NSD1, 1110037F02RIK, ZFP825, SUV420H1, TDRD3, MEAF6, MCL1, AHCTF1, ZFP618, DDX46, PSMB6, NR1D2, TRP53BP2, RAD51L3, BCOR, GTF3C4, TERF2, HNRNPAB…	203	3808	17854	1.40887	0.516824	0.135389	3.8764
SP_PIR_KEYWORDS	peroxisome	6	2.51046	0.00469426	PECR, ACOX1, EHHADH, PEX11C, SERHL, SLC25A17	203	96	17854	5.49692	0.672137	0.16961	5.88123
SP_PIR_KEYWORDS	mrna processing	9	3.76569	0.00610515	PRPF4B, DDX46, BAT1A, RNPS1, LSM10, TSEN2, PRPF4, 1110037F02RIK, RNGTT	203	240	17854	3.29815	0.765747	0.187254	7.58548
SP_PIR_KEYWORDS	repressor	11	4.60251	0.0138203	ZBTB33, PA2G4, NR1D2, DNMT1, TLE1, MAF1, BCOR, NSD1, SUV420H1, NRIP1, HNRNPAB	203	391	17854	2.47432	0.963052	0.337862	16.4121
SP_PIR_KEYWORDS	mrna splicing	7	2.92887	0.0216907	PRPF4B, DDX46, BAT1A, RNPS1, LSM10, PRPF4, 1110037F02RIK	203	191	17854	3.22333	0.994468	0.438686	24.6096
SP_PIR_KEYWORDS	Protease	12	5.02092	0.0304976	PIGK, CTSL, AGBL3, SENP1, PSMB6, MASP1, PAPPA, USP9X, CPXM1, CPA1, MMP14, PLAU	203	509	17854	2.07349	0.999351	0.520036	32.8995
SP_PIR_KEYWORDS	rna-binding	11	4.60251	0.0499881	PA2G4, DDX46, SERBP1, GRSF1, BAT1A, RNPS1, LSM10, PUM2, RBM12, DUS2L, HNRNPAB	203	485	17854	1.99476	0.999995	0.668746	48.3452
SP_PIR_KEYWORDS	carboxypeptidase	3	1.25523	0.0506064	AGBL3, CPXM1, CPA1	203	32	17854	8.24538	0.999995	0.641438	48.7766
SP_PIR_KEYWORDS	mitosis	6	2.51046	0.0529846	MAD1L1, ANAPC5, SAC3D1, KATNA1, USP9X, AHCTF1	203	179	17854	2.94807	0.999998	0.629344	50.4051
SP_PIR_KEYWORDS	mitochondrion inner membrane	6	2.51046	0.0571992	TIMM17A, SLC25A38, NDUFC2, COQ10B, LETM2, NDUFB2	203	183	17854	2.88363	0.999999	0.631051	53.1744
SP_PIR_KEYWORDS	chromatin regulator	6	2.51046	0.0675367	MEAF6, FAM175A, DNMT1, BCOR, NSD1, SUV420H1	203	192	17854	2.74846	1	0.668731	59.3741
SP_PIR_KEYWORDS	cell cycle	10	4.1841	0.0681857	MAD1L1, NBN, ANAPC5, TRP53BP2, SAC3D1, KATNA1, USP9X, CCNT1, AHCTF1, TERF2	203	447	17854	1.96758	1	0.648689	59.7368
SP_PIR_KEYWORDS	chromosomal protein	5	2.09205	0.0687784	HMGN1, HIST1H2BP, NBN, TERF2, SUV420H1	203	136	17854	3.23348	1	0.629692	60.0655
SP_PIR_KEYWORDS	cell division	7	2.92887	0.0711997	MAD1L1, ANAPC5, SAC3D1, KATNA1, USP9X, CCNT1, AHCTF1	203	256	17854	2.4049	1	0.621867	61.3826
SP_PIR_KEYWORDS	zymogen	6	2.51046	0.0759294	CTSL, PSMB6, PAPPA, CPA1, MMP14, PLAU	203	199	17854	2.65178	1	0.626563	63.8405
SP_PIR_KEYWORDS	hydrolase	24	10.0418	0.0834156	AGBL3, ILKAP, MASP1, USP9X, PTPN14, SERHL, MMP14, PNPLA3, RNGTT, CTSL, PIGK, SENP1, PSMB6, DDX46, PAPPA, KATNA1, NT5C2, CPXM1, BAT1A, ABHD12, CPA1, TSEN2, CTBS, PLAU	203	1500	17854	1.40721	1	0.643759	67.4378
SP_PIR_KEYWORDS	metalloprotease	5	2.09205	0.0842107	AGBL3, PAPPA, CPXM1, CPA1, MMP14	203	146	17854	3.01201	1	0.629459	67.7997
SP_PIR_KEYWORDS	Apoptosis	8	3.34728	0.0880535	NISCH, ROCK1, MCL1, TRP53BP2, PGLYRP1, BMF, API5, WDR92	203	337	17854	2.08785	1	0.629523	69.4976
SP_PIR_KEYWORDS	golgi apparatus	11	4.60251	0.0980779	SCFD1, ROCK1, SCYL2, B3GALT1, ARCN1, MTAP6, PRRC1, GOLGA5, QSOX1, GOLGA4, SLC35A3	203	553	17854	1.74947	1	0.65482	73.5456
UP_SEQ_FEATURE	compositionally biased region:His-rich	5	2.09205	0.00790908	NKD2, SENP1, PRPF4B, CCDC55, CCNT1	201	63	16021	6.32591	0.994828	0.994828	11.2083
UP_SEQ_FEATURE	splice variant	72	30.1255	0.00981919	POU6F1, MAD1L1, ILKAP, 0610007C21RIK, MASP1, FAM175A, PEX11C, CBFA2T2, FAM168A, HSPH1, GABPB1, HIST1H2BP, NISCH, PAPPA, MTAP6, PUM2, ZFAT, MASTL, BRD4, CTBS, D3ERTD751E, PQLC2, 4931408A02RIK, ANAPC5, BRAF, ROCK1, ARHGEF18, TTC38, LRP2BP, TLE1, MBD2, TCTE3, PITPNM3, SCYL2, SERBP1, MORC2B, PSME4, TREM2, 1110037F02RIK, SUV420H1, IQCB1, LRRIQ3, MEAF6, TDRD3, NKD2, PTCHD2, ZFP618, ADRB3, DDX46, GM3417…	201	4448	16021	1.29021	0.998559	0.962037	13.7335
UP_SEQ_FEATURE	active site:Nucleophile	7	2.92887	0.0189738	AGBL3, SENP1, PSMB6, CPXM1, NT5C2, 5033411D12RIK, CPA1	201	168	16021	3.3211	0.999997	0.985498	24.9327

## Sheet: Purple
Category	Term	Count	%	PValue	Genes	List Total	Pop Hits	Pop Total	Fold Enrichment	Bonferroni	Benjamini	FDR
GOTERM_BP_FAT	GO:0042552~myelination	3	3.48837	0.00944509	AFG3L2, QK, MBP	55	37	13588	20.0314	0.994051	0.994051	12.9021
GOTERM_BP_FAT	GO:0008366~axon ensheathment	3	3.48837	0.0104557	AFG3L2, QK, MBP	55	39	13588	19.0042	0.996572	0.941451	14.1867
GOTERM_BP_FAT	GO:0007272~ensheathment of neurons	3	3.48837	0.0104557	AFG3L2, QK, MBP	55	39	13588	19.0042	0.996572	0.941451	14.1867
GOTERM_BP_FAT	GO:0019228~regulation of action potential in neuron	3	3.48837	0.0137589	AFG3L2, QK, MBP	55	45	13588	16.4703	0.999437	0.917404	18.2633
GOTERM_BP_FAT	GO:0048878~chemical homeostasis	6	6.97674	0.0146594	GM16409, GM13654, AFG3L2, RPS6, SLC4A4, LOC639593, STAT3, QK, MBP	55	365	13588	4.06117	0.999656	0.863806	19.343
GOTERM_BP_FAT	GO:0001508~regulation of action potential	3	3.48837	0.0194414	AFG3L2, QK, MBP	55	54	13588	13.7253	0.999975	0.88001	24.8572
GOTERM_BP_FAT	GO:0042592~homeostatic process	7	8.13953	0.027637	GM16409, GM13654, SKIL, AFG3L2, RPS6, SLC4A4, LOC639593, STAT3, QK, MBP	55	584	13588	2.96127	1	0.919729	33.4989
GOTERM_BP_FAT	GO:0030163~protein catabolic process	6	6.97674	0.0690553	DCUN1D1, UBA1, USP12, FBXO32, ITCH, AFG3L2	55	556	13588	2.66606	1	0.995994	64.7101
GOTERM_BP_FAT	GO:0010629~negative regulation of gene expression	5	5.81395	0.0795355	KHDRBS1, NACC1, BNIP3L, PRRX1, SKIL	55	410	13588	3.01286	1	0.996281	70.0719
GOTERM_BP_FAT	GO:0042391~regulation of membrane potential	3	3.48837	0.0811022	AFG3L2, QK, MBP	55	119	13588	6.22827	1	0.993748	70.8048
GOTERM_BP_FAT	GO:0007423~sensory organ development	4	4.65116	0.0821291	ASCL1, PRRX1, SKIL, STAT3	55	257	13588	3.84521	1	0.990223	71.2762
GOTERM_BP_FAT	GO:0046907~intracellular transport	5	5.81395	0.0915634	HOOK2, YWHAZ, CHIC2, MACF1, RHOBTB3	55	431	13588	2.86606	1	0.991033	75.2868
GOTERM_BP_FAT	GO:0007049~cell cycle	6	6.97674	0.094364	KHDRBS1, GM16409, GM13654, MACF1, GSPT2, SKIL, RPS6, FOXN3, LOC639593	55	611	13588	2.42607	1	0.988441	76.3729
GOTERM_CC_FAT	GO:0043025~cell soma	3	3.48837	0.0537683	RTN4, ASCL1, MBP	41	117	12504	7.81989	0.994142	0.994142	45.3949
GOTERM_CC_FAT	GO:0015630~microtubule cytoskeleton	5	5.81395	0.054607	CEP97, HOOK2, DNM3, MACF1, TUBA3B, TUBA3A	41	450	12504	3.38862	0.994606	0.926553	45.9225
GOTERM_MF_FAT	GO:0035091~phosphoinositide binding	3	3.48837	0.027723	SH3PXD2A, SNX6, SNX30	47	75	13288	11.3089	0.974136	0.974136	27.921
GOTERM_MF_FAT	GO:0000166~nucleotide binding	14	16.2791	0.0303766	PDK1, DNM3, TUBA3B, BC016495, TUBA3A, AFG3L2, 2810408M09RIK, MAST4, UBA1, GSPT2, ABCB10, SKIL, PIP4K2A, HNRNPH1, RHOBTB3	47	2183	13288	1.81316	0.98187	0.865351	30.1789
GOTERM_MF_FAT	GO:0016564~transcription repressor activity	4	4.65116	0.036359	KHDRBS1, NACC1, PRRX1, SKIL	47	211	13288	5.35969	0.991891	0.799093	35.0341
GOTERM_MF_FAT	GO:0032553~ribonucleotide binding	12	13.9535	0.0394076	PDK1, DNM3, TUBA3B, BC016495, TUBA3A, AFG3L2, 2810408M09RIK, MAST4, UBA1, GSPT2, ABCB10, PIP4K2A, RHOBTB3	47	1796	13288	1.88902	0.994629	0.729279	37.3877
GOTERM_MF_FAT	GO:0032555~purine ribonucleotide binding	12	13.9535	0.0394076	PDK1, DNM3, TUBA3B, BC016495, TUBA3A, AFG3L2, 2810408M09RIK, MAST4, UBA1, GSPT2, ABCB10, PIP4K2A, RHOBTB3	47	1796	13288	1.88902	0.994629	0.729279	37.3877
GOTERM_MF_FAT	GO:0017076~purine nucleotide binding	12	13.9535	0.0508491	PDK1, DNM3, TUBA3B, BC016495, TUBA3A, AFG3L2, 2810408M09RIK, MAST4, UBA1, GSPT2, ABCB10, PIP4K2A, RHOBTB3	47	1871	13288	1.8133	0.998869	0.742535	45.5424
GOTERM_MF_FAT	GO:0030528~transcription regulator activity	9	10.4651	0.0529393	KHDRBS1, ASCL1, NACC1, ARNT2, PRRX1, TCFAP2D, SKIL, FOXN3, STAT3	47	1206	13288	2.10988	0.999151	0.692259	46.9228
GOTERM_MF_FAT	GO:0005543~phospholipid binding	3	3.48837	0.0637758	SH3PXD2A, SNX6, SNX30	47	119	13288	7.12748	0.99981	0.705908	53.5801
GOTERM_MF_FAT	GO:0003924~GTPase activity	3	3.48837	0.0724176	DNM3, TUBA3B, TUBA3A, GSPT2	47	128	13288	6.62633	0.999943	0.705233	58.3319
INTERPRO	IPR001683:Phox-like	3	3.48837	0.0135824	SH3PXD2A, SNX6, SNX30	68	47	17763	16.6737	0.931464	0.931464	15.7044
SMART	SM00312:PX	3	3.48837	0.0138504	SH3PXD2A, SNX6, SNX30	36	47	9131	16.1897	0.466141	0.466141	12.2926
SP_PIR_KEYWORDS	phosphoprotein	38	44.186	0.00140343	CEP97, RTN4, YWHAZ, TUBA3B, TUBA3A, TCOF1, ENPP4, PRRX1, MBP, GM16409, HOOK2, LAPTM5, MACF1, SKIL, ITCH, SLC4A4, KHDRBS1, DNM3, 3110082I17RIK, NACC1, SH3PXD2A, TCFAP2D, INCA1, RPS6, BICD2, STAT3, FOXN3, LOC639593, QK, NCAM2, MAST4, BTF3L4, GM13654, SEMA6D, ANKRD49, UBA1, LIMCH1, PLXDC2, BNIP3L, SNX30, PIP4K2A, HNRNPH1	70	6311	17854	1.53576	0.152718	0.152718	1.59442
SP_PIR_KEYWORDS	transport	12	13.9535	0.037714	HOOK2, LAPTM5, SNX6, TRAPPC6B, TCOF1, ABCB10, SLC25A27, SNX30, SLC4A4, SLC7A6, QK, RHOBTB3	70	1571	17854	1.94824	0.989288	0.896499	35.594
SP_PIR_KEYWORDS	methylation	4	4.65116	0.0540559	KHDRBS1, HNRNPH1, QK, MBP	70	221	17854	4.61642	0.998581	0.887615	47.0586
SP_PIR_KEYWORDS	acetylation	15	17.4419	0.0589876	KHDRBS1, RTN4, DNM3, YWHAZ, TCOF1, ENDOD1, AFG3L2, RPS6, LOC639593, MBP, GM16409, GM13654, UBA1, TRAPPC6B, GSPT2, ABCB10, HNRNPH1, PIP4K2A	70	2325	17854	1.64553	0.999234	0.833635	50.1328
SP_PIR_KEYWORDS	nucleotide-binding	11	12.7907	0.0956626	PDK1, MAST4, DNM3, UBA1, TUBA3B, TUBA3A, GSPT2, BC016495, ABCB10, PIP4K2A, AFG3L2, RHOBTB3	70	1631	17854	1.72019	0.999993	0.906804	68.3605
UP_SEQ_FEATURE	domain:PX	3	3.48837	0.0133194	SH3PXD2A, SNX6, SNX30	68	42	16021	16.8288	0.973228	0.973228	16.1635
UP_SEQ_FEATURE	domain:KH	2	2.32558	0.0490622	KHDRBS1, QK	68	12	16021	39.2672	0.999999	0.998877	48.3892
UP_SEQ_FEATURE	domain:PSI	2	2.32558	0.0530421	SEMA6D, PLXDC2	68	13	16021	36.2466	1	0.992591	51.1581
UP_SEQ_FEATURE	repeat:1-2	2	2.32558	0.0919486	UBA1, HNRNPH1	68	23	16021	20.4872	1	0.998513	71.8661
UP_SEQ_FEATURE	repeat:1-1	2	2.32558	0.0919486	UBA1, HNRNPH1	68	23	16021	20.4872	1	0.998513	71.8661

## Sheet: Pink
Category	Term	Count	%	PValue	Genes	List Total	Pop Hits	Pop Total	Fold Enrichment	Bonferroni	Benjamini	FDR
GOTERM_BP_FAT	GO:0006955~immune response	28	15.2174	2.21626e-13	H2-D1, CCL9, TLR7, CCL6, RNF125, SLC11A1, TMEM173, FCER1G, INPP5D, AF251705, PTPRC, NCF1, TLR13, TNFRSF13B, CCL19, MYO1F, FCGR1, CLEC4N, FCGR3, C1QA, LAT2, FCGR2B, H2-OA, IRF8, CLEC7A, CLEC5A, CD14, LCP1	140	471	13588	5.76985	3.11127e-10	3.11127e-10	3.65252e-10
GOTERM_BP_FAT	GO:0001775~cell activation	19	10.3261	6.19916e-11	FYB, GNA13, PTPRC, PLEK, LRRC8A, IKZF1, MYO1F, ITGB2, WAS, FCGR3, CD48, SLC11A1, BCL2A1D, LAT2, CD86, FCGR2B, FCER1G, ENTPD1, LCP1	140	246	13588	7.49628	8.70361e-08	4.3518e-08	1.02177e-07
SP_PIR_KEYWORDS	immune response	15	8.15217	1.46908e-09	TLR13, TNFRSF13B, H2-D1, FCGR1, TLR7, CLEC4N, C1QA, RNF125, LAT2, TMEM173, CLEC7A, INPP5D, AF251705, CLEC5A, CD14	164	184	17854	8.87493	3.5258e-07	3.5258e-07	1.89622e-06
UP_SEQ_FEATURE	topological domain:Extracellular	52	28.2609	2.89059e-09	GPR160, LRRC8A, H2-D1, TLR7, SEZ6L2, TMEM173, 4632428N05RIK, SLC2A1, CSF2RB, EVI2B, AF251705, IFNGR1, EGFR, LAIR1, ADIPOR2, CLEC4N, CD163, GABRR2, CD84, ADRB2, LAT2, CD86, CD33, CLEC5A, C3AR1, MFSD8, SLC38A2, CSF1, PAQR8, ITGB2, SLC11A1, P2RY6, IL10RA, FCER1G, ENTPD1, CSF1R, HAVCR2, PTPRC, SLAMF9, TLR13, TNFRSF13B, GJB6, FZD2, FCGR1, FCGR3, LYVE1, FCGR2B, EMR1, ABCC3, CLEC7A, MERTK, TMEM119	163	2174	16021	2.35096	1.54068e-06	1.54068e-06	4.19996e-06
GOTERM_BP_FAT	GO:0045321~leukocyte activation	16	8.69565	6.66335e-09	FYB, PTPRC, LRRC8A, IKZF1, MYO1F, ITGB2, WAS, FCGR3, CD48, SLC11A1, LAT2, CD86, BCL2A1D, FCGR2B, FCER1G, LCP1	140	219	13588	7.09093	9.3553e-06	3.11844e-06	1.09828e-05
SP_PIR_KEYWORDS	disulfide bond	52	28.2609	7.16043e-09	EDN1, H2-D1, SLC7A7, CD48, SEZ6L2, OLFML3, ANG, 4632428N05RIK, CSF2RB, AF251705, IFNGR1, EGFR, LAIR1, CST3, CTSS, CLEC4N, CD163, C1QA, GABRR2, CD84, ADRB2, CD86, CD33, CLEC5A, C3AR1, CPM, CSF1, CCL9, ACP2, ITGB2, CCL6, P2RY6, CRISPLD2, IL10RA, FCER1G, ENTPD1, CSF1R, HAVCR2, LY6C1, RNASE4, SLAMF9, TNFRSF13B, CCL19, FZD2, FCGR1, LY6C2, FCGR3, LYVE1, FCGR2B, EMR1, CLEC7A, MERTK, CD14	164	2469	17854	2.29284	1.7185e-06	8.59252e-07	9.24233e-06
GOTERM_BP_FAT	GO:0006952~defense response	21	11.413	2.86188e-08	PTPRC, NCF1, HCK, TLR13, H2-D1, MYO1F, CCL19, ITGB2, FCGR1, TLR7, CD163, FCGR3, C1QA, SLC11A1, TMEM173, FCGR2B, NUPR1, IRF8, FCER1G, CLEC7A, CD14	140	448	13588	4.54955	4.01799e-05	1.00451e-05	4.71706e-05
GOTERM_BP_FAT	GO:0006909~phagocytosis	9	4.8913	3.10184e-08	SLC11A1, FCGR2B, HCK, IRF8, FCER1G, CLEC7A, MERTK, FCGR1, FCGR3	140	49	13588	17.8268	4.35489e-05	8.70994e-06	5.11259e-05
SP_PIR_KEYWORDS	glycoprotein	64	34.7826	3.86642e-08	GPR160, LRRC8A, FAM20A, F13A1, H2-D1, CD52, TLR7, SLC7A7, CD48, SEZ6L2, OLFML3, PLOD3, 4632428N05RIK, CH25H, SLC2A1, CSF2RB, LGI4, EVI2B, AF251705, IFNGR1, EGFR, LAIR1, CTSS, CLEC4N, CD163, PNPLA7, GABRR2, CD84, C1QA, CD86, ADRB2, CD33, CASQ1, CLEC5A, C3AR1, CPM, SLC38A2, CSF1, ACP2, ITGB2, SLC11A1, P2RY6, CRISPLD2, IL10RA, ENTPD1, CSF1R, HAVCR2, LY6C1, PTPRC, SLAMF9, TLR13, CCL19, FZD2, SLCO2B1,…	164	3600	17854	1.93539	9.27936e-06	3.09313e-06	4.99057e-05
GOTERM_BP_FAT	GO:0002252~immune effector process	12	6.52174	6.42887e-08	C1QA, PTPRC, SLC11A1, LAT2, FCGR2B, NCF1, MYO1F, FCER1G, INPP5D, TLR7, FCGR1, FCGR3	140	126	13588	9.24354	9.02572e-05	1.50434e-05	0.000105963
GOTERM_BP_FAT	GO:0009611~response to wounding	18	9.78261	9.13137e-08	GNA13, PLEK, NCF1, F13A1, TLR13, CCL19, ITGB2, FCGR1, TLR7, CD163, FCGR3, C1QA, SLC11A1, NUPR1, CLEC7A, ENTPD1, LCP1, CD14	140	347	13588	5.03466	0.000128196	1.83148e-05	0.000150507
SP_PIR_KEYWORDS	membrane	83	45.1087	1.53038e-07	GNA13, LRRC8A, GPR160, H2-D1, SELENBP1, CD52, TLR7, TENC1, SLC7A7, BTK, CD48, SEZ6L2, TMEM173, PLOD3, KCNK6, 4632428N05RIK, CH25H, SLC2A1, NIPAL3, CSF2RB, EVI2B, AF251705, IFNGR1, EGFR, LAIR1, LYN, PLD4, ADIPOR2, CLEC4N, CD163, PNPLA7, GABRR2, CD84, CD86, ADRB2, LAT2, CD33, RAB10, CLEC5A, LCP1, C3AR1, CPM, SLC38A2, MFSD8, CSF1, PHKA1, ITGB2, ACP2, PAQR8, SLC11A1, P2RY6, LAPTM5, RAC2, IL10RA, ALOX…	164	5507	17854	1.6408	3.67286e-05	9.18227e-06	0.000197534
SP_PIR_KEYWORDS	signal	55	29.8913	1.78621e-07	FAM20A, EDN1, H2-D1, CD52, TLR7, CD48, SEZ6L2, OLFML3, HTRA1, ANG, 4632428N05RIK, PLOD3, CSF2RB, LGI4, EVI2B, AF251705, IFNGR1, EGFR, LAIR1, CST3, CTSS, CD163, C1QA, GABRR2, CD84, CD86, H2-OA, CD33, CASQ1, CPM, CSF1, CCL9, ACP2, ITGB2, CCL6, CRISPLD2, IL10RA, FCER1G, CSF1R, LY6C1, HAVCR2, PTPRC, SLAMF9, RNASE4, TLR13, CCL19, FZD2, FCGR1, FCGR3, LY6C2, LYVE1, FCGR2B, EMR1, MERTK, TMEM119, CD14	164	2970	17854	2.01603	4.28682e-05	8.57378e-06	0.000230555
GOTERM_BP_FAT	GO:0002443~leukocyte mediated immunity	10	5.43478	3.00524e-07	C1QA, SLC11A1, LAT2, FCGR2B, NCF1, MYO1F, FCER1G, INPP5D, FCGR1, FCGR3	140	89	13588	10.9053	0.000421847	5.27406e-05	0.000495335
UP_SEQ_FEATURE	disulfide bond	50	27.1739	4.24564e-07	EDN1, H2-D1, CD48, SEZ6L2, OLFML3, ANG, 4632428N05RIK, CSF2RB, AF251705, IFNGR1, EGFR, LAIR1, CST3, CTSS, CLEC4N, CD163, C1QA, GABRR2, CD84, ADRB2, CD86, CD33, CLEC5A, C3AR1, CPM, CSF1, CCL9, ACP2, ITGB2, CCL6, P2RY6, CRISPLD2, IL10RA, FCER1G, CSF1R, HAVCR2, LY6C1, RNASE4, SLAMF9, TNFRSF13B, CCL19, FZD2, FCGR1, LY6C2, FCGR3, LYVE1, FCGR2B, EMR1, CLEC7A, MERTK, CD14	163	2379	16021	2.06575	0.000226267	0.00011314	0.000616881
UP_SEQ_FEATURE	topological domain:Cytoplasmic	55	29.8913	5.65438e-07	GPR160, LRRC8A, H2-D1, TLR7, SEZ6L2, TMEM173, 4632428N05RIK, SLC2A1, CSF2RB, EVI2B, AF251705, IFNGR1, EGFR, LAIR1, ADIPOR2, CLEC4N, CD163, GABRR2, CD84, ADRB2, LAT2, CD86, CD33, CLEC5A, C3AR1, SLC38A2, MFSD8, CSF1, PAQR8, ACP2, ITGB2, SLC11A1, P2RY6, ALOX5AP, IL10RA, FCER1G, PEX12, ENTPD1, CSF1R, HAVCR2, PTPRC, SLAMF9, TLR13, TNFRSF13B, GJB6, FZD2, FCGR1, FCGR3, LYVE1, FCGR2B, EMR1, ABCC3, CLEC7A…	163	2780	16021	1.94455	0.000301333	0.000100454	0.000821565
UP_SEQ_FEATURE	glycosylation site:N-linked (GlcNAc...)	63	34.2391	7.93724e-07	GPR160, LRRC8A, FAM20A, F13A1, H2-D1, CD52, TLR7, SLC7A7, CD48, SEZ6L2, OLFML3, PLOD3, 4632428N05RIK, CH25H, SLC2A1, CSF2RB, LGI4, EVI2B, AF251705, IFNGR1, EGFR, LAIR1, CTSS, CLEC4N, CD163, PNPLA7, GABRR2, CD84, C1QA, CD86, ADRB2, CD33, CASQ1, CLEC5A, C3AR1, CPM, SLC38A2, CSF1, ACP2, ITGB2, SLC11A1, P2RY6, CRISPLD2, IL10RA, ENTPD1, CSF1R, HAVCR2, PTPRC, SLAMF9, TLR13, CCL19, FZD2, SLCO2B1, FCGR1,…	163	3444	16021	1.79796	0.000422966	0.000105758	0.00115326
GOTERM_BP_FAT	GO:0048002~antigen processing and presentation of peptide antigen	7	3.80435	1.30772e-06	SLC11A1, H2-OA, FCGR2B, H2-D1, FCER1G, FCGR1, FCGR3	140	35	13588	19.4114	0.00183435	0.000203983	0.00215541
GOTERM_BP_FAT	GO:0002274~myeloid leukocyte activation	7	3.80435	1.30772e-06	FYB, SLC11A1, LAT2, FCGR2B, MYO1F, FCER1G, FCGR3	140	35	13588	19.4114	0.00183435	0.000203983	0.00215541
GOTERM_BP_FAT	GO:0050766~positive regulation of phagocytosis	6	3.26087	3.02389e-06	SLC11A1, FCGR2B, FCER1G, CLEC7A, FCGR1, FCGR3	140	23	13588	25.3193	0.00423655	0.000424465	0.00498399
GOTERM_BP_FAT	GO:0006954~inflammatory response	13	7.06522	3.32103e-06	NCF1, TLR13, CCL19, ITGB2, FCGR1, TLR7, FCGR3, CD163, C1QA, SLC11A1, NUPR1, CLEC7A, CD14	140	225	13588	5.60775	0.00465188	0.000423795	0.00547372
SP_PIR_KEYWORDS	cell membrane	36	19.5652	4.10962e-06	C3AR1, CPM, SLC38A2, GPR160, CSF1, PHKA1, H2-D1, CD52, PAQR8, TENC1, SLC7A7, CD48, SEZ6L2, TMEM173, P2RY6, SLC2A1, FCER1G, AF251705, INPP5D, LY6C1, LAIR1, LYN, GJB6, FCGR1, LY6C2, FCGR3, CD163, CD84, GABRR2, ADRB2, LAT2, EMR1, FCGR2B, CD33, RAB10, CD14, LCP1	164	1713	17854	2.2879	0.000985825	0.000164372	0.00530436
UP_SEQ_FEATURE	signal peptide	55	29.8913	4.26362e-06	FAM20A, EDN1, H2-D1, CD52, TLR7, CD48, SEZ6L2, OLFML3, HTRA1, ANG, 4632428N05RIK, PLOD3, CSF2RB, LGI4, EVI2B, AF251705, IFNGR1, EGFR, LAIR1, CST3, CTSS, CD163, C1QA, GABRR2, CD84, CD86, H2-OA, CD33, CASQ1, CPM, CSF1, CCL9, ACP2, ITGB2, CCL6, CRISPLD2, IL10RA, FCER1G, CSF1R, LY6C1, HAVCR2, PTPRC, SLAMF9, RNASE4, TLR13, CCL19, FZD2, FCGR1, FCGR3, LY6C2, LYVE1, FCGR2B, EMR1, MERTK, TMEM119, CD14	163	2963	16021	1.82445	0.00226993	0.000454399	0.00619477
GOTERM_BP_FAT	GO:0050764~regulation of phagocytosis	6	3.26087	4.69664e-06	SLC11A1, FCGR2B, FCER1G, CLEC7A, FCGR1, FCGR3	140	25	13588	23.2937	0.00657241	0.000549357	0.00774092
GOTERM_MF_FAT	GO:0019864~IgG binding	4	2.17391	7.45061e-06	FCGR2B, FCER1G, FCGR1, FCGR3	123	5	13288	86.426	0.0023665	0.0023665	0.0100442
GOTERM_BP_FAT	GO:0002684~positive regulation of immune system process	12	6.52174	8.55346e-06	C1QA, PTPRC, SLC11A1, BCL2A1D, LAT2, IKZF1, LYN, FCER1G, INPP5D, CLEC7A, FCGR1, FCGR3	140	206	13588	5.65381	0.0119373	0.000923351	0.0140972
GOTERM_BP_FAT	GO:0050778~positive regulation of immune response	10	5.43478	1.05489e-05	C1QA, PTPRC, SLC11A1, BCL2A1D, LAT2, LYN, FCER1G, CLEC7A, FCGR1, FCGR3	140	136	13588	7.13655	0.0147016	0.00105735	0.0173858
GOTERM_BP_FAT	GO:0006911~phagocytosis, engulfment	5	2.71739	1.31152e-05	FCGR2B, FCER1G, CLEC7A, FCGR1, FCGR3	140	15	13588	32.3524	0.0182454	0.00122684	0.0216148
GOTERM_BP_FAT	GO:0045576~mast cell activation	5	2.71739	1.31152e-05	FYB, LAT2, FCGR2B, FCER1G, FCGR3	140	15	13588	32.3524	0.0182454	0.00122684	0.0216148
KEGG_PATHWAY	mmu04666:Fc gamma R-mediated phagocytosis	9	4.8913	1.7266e-05	PTPRC, LYN, RAC2, FCGR2B, NCF1, HCK, INPP5D, WAS, FCGR1	69	98	5738	7.63709	0.00163894	0.00163894	0.0189772
GOTERM_BP_FAT	GO:0048584~positive regulation of response to stimulus	11	5.97826	2.10001e-05	C1QA, PTPRC, SLC11A1, BCL2A1D, LAT2, LYN, TGM2, FCER1G, CLEC7A, FCGR1, FCGR3	140	186	13588	5.73994	0.029054	0.00184108	0.0346076
GOTERM_BP_FAT	GO:0002444~myeloid leukocyte mediated immunity	5	2.71739	2.25065e-05	LAT2, NCF1, MYO1F, FCGR1, FCGR3	140	17	13588	28.5462	0.0311054	0.00185707	0.0370897
GOTERM_BP_FAT	GO:0045807~positive regulation of endocytosis	6	3.26087	2.28436e-05	SLC11A1, FCGR2B, FCER1G, CLEC7A, FCGR1, FCGR3	140	34	13588	17.1277	0.031564	0.00178024	0.0376452
GOTERM_BP_FAT	GO:0042110~T cell activation	9	4.8913	2.45912e-05	CD48, PTPRC, SLC11A1, CD86, BCL2A1D, IKZF1, ITGB2, WAS, LCP1	140	116	13588	7.5303	0.0339373	0.00181554	0.0405246
GOTERM_BP_FAT	GO:0046649~lymphocyte activation	11	5.97826	2.63929e-05	CD48, PTPRC, SLC11A1, CD86, BCL2A1D, LAT2, IKZF1, LRRC8A, ITGB2, WAS, LCP1	140	191	13588	5.58968	0.036378	0.00185109	0.0434931
GOTERM_CC_FAT	GO:0009897~external side of plasma membrane	11	5.97826	5.30172e-05	LY6C1, CD48, PTPRC, CD86, EMR1, FCGR2B, TNFRSF13B, H2-D1, FCER1G, CLEC7A, FCGR1, LY6C2	130	206	12504	5.13607	0.00991798	0.00991798	0.0657579
GOTERM_CC_FAT	GO:0005886~plasma membrane	51	27.7174	5.31809e-05	GNA13, GPR160, H2-D1, CD52, TENC1, SLC7A7, CD48, SEZ6L2, TMEM173, SLC2A1, AF251705, EGFR, LAIR1, LYN, CD163, GABRR2, CD84, ADRB2, LAT2, CD86, H2-OA, CD33, RAB10, LCP1, C3AR1, CPM, SLC38A2, CSF1, PHKA1, PAQR8, ITGB2, P2RY6, LAPTM5, TGM2, FCER1G, INPP5D, CSF1R, LY6C1, PTPRC, TNFRSF13B, GJB6, SLCO2B1, FCGR1, LY6C2, FCGR3, COG4, LYVE1, FCGR2B, EMR1, ABCC3, CLEC7A, CD14	130	2906	12504	1.68803	0.00994846	0.00498666	0.0659609
SP_PIR_KEYWORDS	Immunoglobulin domain	15	8.15217	5.70893e-05	HAVCR2, LAIR1, SLAMF9, FCGR1, FCGR3, CD84, CD48, CD86, FCGR2B, CD33, 4632428N05RIK, AF251705, MERTK, IFNGR1, CSF1R	164	443	17854	3.6862	0.0136084	0.00195549	0.0736629
GOTERM_BP_FAT	GO:0002429~immune response-activating cell surface receptor signaling pathway	6	3.26087	5.80876e-05	PTPRC, BCL2A1D, LAT2, LYN, FCER1G, CLEC7A	140	41	13588	14.2035	0.0783202	0.00387615	0.0956994
GOTERM_CC_FAT	GO:0009986~cell surface	13	7.06522	7.31822e-05	LY6C1, PTPRC, TNFRSF13B, H2-D1, ITGB2, FCGR1, LY6C2, CD48, SLC11A1, CD86, FCGR2B, EMR1, FCER1G, CLEC7A	130	305	12504	4.09967	0.0136645	0.00457575	0.0907585
GOTERM_MF_FAT	GO:0032403~protein complex binding	7	3.80435	7.92891e-05	ADRB2, LYN, FCGR2B, HCLS1, FCER1G, FCGR1, FCGR3	123	78	13288	9.69523	0.0248997	0.0125283	0.106842
GOTERM_BP_FAT	GO:0002478~antigen processing and presentation of exogenous peptide antigen	5	2.71739	7.9838e-05	H2-OA, FCGR2B, FCER1G, FCGR1, FCGR3	140	23	13588	21.0994	0.106042	0.00508236	0.131511
GOTERM_BP_FAT	GO:0002768~immune response-regulating cell surface receptor signaling pathway	6	3.26087	8.21337e-05	PTPRC, BCL2A1D, LAT2, LYN, FCER1G, CLEC7A	140	44	13588	13.2351	0.10892	0.00500139	0.13529
GOTERM_MF_FAT	GO:0019865~immunoglobulin binding	4	2.17391	0.000118071	FCGR2B, FCER1G, FCGR1, FCGR3	123	11	13288	39.2846	0.0368525	0.0124382	0.159062
GOTERM_BP_FAT	GO:0042127~regulation of cell proliferation	17	9.23913	0.000122161	EGFR, SAT1, PTPRC, LYN, HCLS1, CSF1, TNFRSF13B, EDN1, GJB6, ATF5, ADRB2, FCGR2B, NUPR1, RAC2, ANG, TGM2, INPP5D	140	538	13588	3.06686	0.157621	0.00712139	0.201161
GOTERM_BP_FAT	GO:0002449~lymphocyte mediated immunity	7	3.80435	0.000124924	C1QA, SLC11A1, FCGR2B, FCER1G, INPP5D, FCGR1, FCGR3	140	76	13588	8.93947	0.160882	0.0069916	0.205706
GOTERM_BP_FAT	GO:0002757~immune response-activating signal transduction	6	3.26087	0.000125324	PTPRC, BCL2A1D, LAT2, LYN, FCER1G, CLEC7A	140	48	13588	12.1321	0.161354	0.00674509	0.206365
GOTERM_BP_FAT	GO:0006935~chemotaxis	8	4.34783	0.000126	C3AR1, RAC2, CCL9, FCER1G, CCL19, ITGB2, FCGR3, CCL6	140	109	13588	7.12346	0.162149	0.00653097	0.207475
GOTERM_BP_FAT	GO:0042330~taxis	8	4.34783	0.000126	C3AR1, RAC2, CCL9, FCER1G, CCL19, ITGB2, FCGR3, CCL6	140	109	13588	7.12346	0.162149	0.00653097	0.207475
INTERPRO	IPR003599:Immunoglobulin subtype	12	6.52174	0.000128948	HAVCR2, CD84, CD48, FCGR2B, SLAMF9, 4632428N05RIK, CD33, AF251705, MERTK, FCGR1, CSF1R, FCGR3	161	313	17763	4.22987	0.0470852	0.0470852	0.177951
GOTERM_BP_FAT	GO:0006897~endocytosis	10	5.43478	0.000134066	SLC11A1, ADRB2, FCGR2B, HCK, IRF8, FCER1G, CLEC7A, MERTK, FCGR1, FCGR3	140	188	13588	5.16261	0.171585	0.00670033	0.220743
GOTERM_BP_FAT	GO:0010324~membrane invagination	10	5.43478	0.000134066	SLC11A1, ADRB2, FCGR2B, HCK, IRF8, FCER1G, CLEC7A, MERTK, FCGR1, FCGR3	140	188	13588	5.16261	0.171585	0.00670033	0.220743
UP_SEQ_FEATURE	transmembrane region	64	34.7826	0.000140907	GPR160, LRRC8A, H2-D1, TLR7, SLC7A7, SEZ6L2, TMEM173, 4632428N05RIK, CH25H, SLC2A1, NIPAL3, CSF2RB, EVI2B, AF251705, IFNGR1, EGFR, LAIR1, PLD4, ADIPOR2, CLEC4N, CD163, PNPLA7, GABRR2, CD84, CD86, ADRB2, LAT2, CD33, CLEC5A, C3AR1, SLC38A2, MFSD8, CSF1, ITGB2, PAQR8, ACP2, SLC11A1, P2RY6, LAPTM5, ALOX5AP, IL10RA, FCER1G, PEX12, ENTPD1, CSF1R, HAVCR2, SCD1, PTPRC, SLAMF9, TLR13, TNFRSF13B, FZD2, GJB…	163	4113	16021	1.52941	0.0723576	0.0124401	0.20454
GOTERM_BP_FAT	GO:0019884~antigen processing and presentation of exogenous antigen	5	2.71739	0.000177424	H2-OA, FCGR2B, FCER1G, FCGR1, FCGR3	140	28	13588	17.3316	0.220518	0.00855376	0.292037
GOTERM_BP_FAT	GO:0030100~regulation of endocytosis	6	3.26087	0.000184091	SLC11A1, FCGR2B, FCER1G, CLEC7A, FCGR1, FCGR3	140	52	13588	11.1989	0.227781	0.00857923	0.302994
GOTERM_BP_FAT	GO:0002764~immune response-regulating signal transduction	6	3.26087	0.000184091	PTPRC, BCL2A1D, LAT2, LYN, FCER1G, CLEC7A	140	52	13588	11.1989	0.227781	0.00857923	0.302994
GOTERM_BP_FAT	GO:0002460~adaptive immune response based on somatic recombination of immune receptors built from immunoglobulin superfamily domains	7	3.80435	0.000217261	C1QA, SLC11A1, FCGR2B, FCER1G, INPP5D, FCGR1, FCGR3	140	84	13588	8.0881	0.262927	0.00979264	0.357498
GOTERM_BP_FAT	GO:0002250~adaptive immune response	7	3.80435	0.000217261	C1QA, SLC11A1, FCGR2B, FCER1G, INPP5D, FCGR1, FCGR3	140	84	13588	8.0881	0.262927	0.00979264	0.357498
GOTERM_BP_FAT	GO:0002712~regulation of B cell mediated immunity	5	2.71739	0.00023374	PTPRC, FCGR2B, FCER1G, FCGR1, FCGR3	140	30	13588	16.1762	0.279788	0.0102041	0.384565
GOTERM_BP_FAT	GO:0002889~regulation of immunoglobulin mediated immune response	5	2.71739	0.00023374	PTPRC, FCGR2B, FCER1G, FCGR1, FCGR3	140	30	13588	16.1762	0.279788	0.0102041	0.384565
GOTERM_BP_FAT	GO:0002253~activation of immune response	7	3.80435	0.000247135	C1QA, PTPRC, BCL2A1D, LAT2, LYN, FCER1G, CLEC7A	140	86	13588	7.9	0.293209	0.0104607	0.406559
GOTERM_BP_FAT	GO:0002822~regulation of adaptive immune response based on somatic recombination of immune receptors built from immunoglobulin superfamily domains	6	3.26087	0.000261857	PTPRC, SLC11A1, FCGR2B, FCER1G, FCGR1, FCGR3	140	56	13588	10.399	0.307672	0.0107563	0.43073
GOTERM_BP_FAT	GO:0002819~regulation of adaptive immune response	6	3.26087	0.000261857	PTPRC, SLC11A1, FCGR2B, FCER1G, FCGR1, FCGR3	140	56	13588	10.399	0.307672	0.0107563	0.43073
GOTERM_BP_FAT	GO:0019882~antigen processing and presentation	7	3.80435	0.000263235	SLC11A1, H2-OA, FCGR2B, H2-D1, FCER1G, FCGR1, FCGR3	140	87	13588	7.8092	0.309011	0.0105053	0.432993
GOTERM_BP_FAT	GO:0051240~positive regulation of multicellular organismal process	9	4.8913	0.000268839	SLC11A1, ADRB2, IKZF1, CSF1, EDN1, FCER1G, CLEC7A, TLR7, CD14	140	163	13588	5.35898	0.314428	0.0104314	0.442191
GOTERM_BP_FAT	GO:0002864~regulation of acute inflammatory response to antigenic stimulus	4	2.17391	0.000277936	FCGR2B, FCER1G, FCGR1, FCGR3	140	13	13588	29.8637	0.32313	0.0104926	0.457122
GOTERM_BP_FAT	GO:0002883~regulation of hypersensitivity	4	2.17391	0.000277936	FCGR2B, FCER1G, FCGR1, FCGR3	140	13	13588	29.8637	0.32313	0.0104926	0.457122
GOTERM_BP_FAT	GO:0050727~regulation of inflammatory response	6	3.26087	0.000284698	ADRB2, FCGR2B, TGM2, FCER1G, FCGR1, FCGR3	140	57	13588	10.2165	0.329528	0.0104652	0.468218
GOTERM_BP_FAT	GO:0001805~positive regulation of type III hypersensitivity	3	1.63043	0.000309604	FCER1G, FCGR1, FCGR3	140	3	13588	97.0571	0.352574	0.0110856	0.509081
GOTERM_BP_FAT	GO:0001803~regulation of type III hypersensitivity	3	1.63043	0.000309604	FCER1G, FCGR1, FCGR3	140	3	13588	97.0571	0.352574	0.0110856	0.509081
GOTERM_BP_FAT	GO:0002714~positive regulation of B cell mediated immunity	4	2.17391	0.000351093	PTPRC, FCER1G, FCGR1, FCGR3	140	14	13588	27.7306	0.389221	0.0122499	0.577116
GOTERM_BP_FAT	GO:0002891~positive regulation of immunoglobulin mediated immune response	4	2.17391	0.000351093	PTPRC, FCER1G, FCGR1, FCGR3	140	14	13588	27.7306	0.389221	0.0122499	0.577116
INTERPRO	IPR007110:Immunoglobulin-like	16	8.69565	0.000375418	HAVCR2, LAIR1, SLAMF9, H2-D1, FCGR1, FCGR3, CD84, CD48, CD86, H2-OA, FCGR2B, CD33, 4632428N05RIK, AF251705, MERTK, CSF1R	161	604	17763	2.92263	0.131018	0.0678079	0.517266
GOTERM_BP_FAT	GO:0002821~positive regulation of adaptive immune response	5	2.71739	0.000383212	PTPRC, SLC11A1, FCER1G, FCGR1, FCGR3	140	34	13588	14.2731	0.416162	0.0130394	0.629755
GOTERM_BP_FAT	GO:0002824~positive regulation of adaptive immune response based on somatic recombination of immune receptors built from immunoglobulin superfamily domains	5	2.71739	0.000383212	PTPRC, SLC11A1, FCER1G, FCGR1, FCGR3	140	34	13588	14.2731	0.416162	0.0130394	0.629755
GOTERM_BP_FAT	GO:0016064~immunoglobulin mediated immune response	6	3.26087	0.000455054	C1QA, FCGR2B, FCER1G, INPP5D, FCGR1, FCGR3	140	63	13588	9.24354	0.472202	0.0151001	0.747403
GOTERM_BP_FAT	GO:0016044~membrane organization	11	5.97826	0.000483413	PLEKHF1, SLC11A1, ADRB2, FCGR2B, HCK, IRF8, FCER1G, CLEC7A, MERTK, FCGR1, FCGR3	140	272	13588	3.92511	0.492813	0.0156638	0.793807
SP_PIR_KEYWORDS	igg-binding protein	3	1.63043	0.000491101	FCGR2B, FCGR1, FCGR3	164	4	17854	81.6494	0.111209	0.0146286	0.632039
GOTERM_MF_FAT	GO:0019763~immunoglobulin receptor activity	3	1.63043	0.000495639	FCER1G, FCGR1, FCGR3	123	4	13288	81.0244	0.145853	0.0386465	0.666144
GOTERM_CC_FAT	GO:0005764~lysosome	9	4.8913	0.000508224	PNPLA7, PLEKHF1, SLC11A1, MFSD8, LAPTM5, MT1, ACP2, CTSS, SLC15A3	130	178	12504	4.86327	0.0911456	0.0236094	0.628723
GOTERM_BP_FAT	GO:0019724~B cell mediated immunity	6	3.26087	0.000526093	C1QA, FCGR2B, FCER1G, INPP5D, FCGR1, FCGR3	140	65	13588	8.95912	0.522327	0.0166514	0.863605
GOTERM_CC_FAT	GO:0000323~lytic vacuole	9	4.8913	0.000527463	PNPLA7, PLEKHF1, SLC11A1, MFSD8, LAPTM5, MT1, ACP2, CTSS, SLC15A3	130	179	12504	4.8361	0.0944286	0.0196424	0.652452
GOTERM_BP_FAT	GO:0042981~regulation of apoptosis	16	8.69565	0.000534071	PTPRC, GCLC, CYCS, FCGR1, FCGR3, PLEKHF1, ATF5, ADRB2, TSC22D3, BCL2A1D, BCL2A1B, NUPR1, BCL2A1A, TGM2, FCER1G, INPP5D	140	553	13588	2.80816	0.52765	0.0165293	0.876648
GOTERM_BP_FAT	GO:0043067~regulation of programmed cell death	16	8.69565	0.000608307	PTPRC, GCLC, CYCS, FCGR1, FCGR3, PLEKHF1, ATF5, ADRB2, TSC22D3, BCL2A1D, BCL2A1B, NUPR1, BCL2A1A, TGM2, FCER1G, INPP5D	140	560	13588	2.77306	0.574429	0.0184008	0.997929
GOTERM_BP_FAT	GO:0030852~regulation of granulocyte differentiation	3	1.63043	0.000615049	IKZF1, INPP5D, RUNX1	140	4	13588	72.7929	0.57844	0.0182107	1.00894
GOTERM_BP_FAT	GO:0002474~antigen processing and presentation of peptide antigen via MHC class I	4	2.17391	0.000641303	H2-D1, FCER1G, FCGR1, FCGR3	140	17	13588	22.837	0.593706	0.0185892	1.05179
GOTERM_BP_FAT	GO:0010941~regulation of cell death	16	8.69565	0.000642726	PTPRC, GCLC, CYCS, FCGR1, FCGR3, PLEKHF1, ATF5, ADRB2, TSC22D3, BCL2A1D, BCL2A1B, NUPR1, BCL2A1A, TGM2, FCER1G, INPP5D	140	563	13588	2.75828	0.594517	0.0182533	1.05411
GOTERM_BP_FAT	GO:0032101~regulation of response to external stimulus	7	3.80435	0.000652302	ADRB2, PLEK, FCGR2B, TGM2, FCER1G, FCGR1, FCGR3	140	103	13588	6.59612	0.599936	0.0181558	1.06974
SMART	SM00409:IG	12	6.52174	0.00071075	HAVCR2, CD84, CD48, FCGR2B, SLAMF9, 4632428N05RIK, CD33, AF251705, MERTK, FCGR1, CSF1R, FCGR3	103	313	9131	3.39874	0.0673062	0.0673062	0.783081
INTERPRO	IPR013783:Immunoglobulin-like fold	16	8.69565	0.000728678	HAVCR2, LAIR1, F13A1, H2-D1, FCGR1, FCGR3, CD48, CD86, H2-OA, FCGR2B, 4632428N05RIK, CD33, TGM2, AF251705, MERTK, CSF1R	161	644	17763	2.7411	0.238622	0.0868681	1.00174
SP_PIR_KEYWORDS	inflammatory response	6	3.26087	0.000735965	TLR13, CCL19, CLEC7A, TLR7, CD14, CD163	164	78	17854	8.3743	0.161966	0.0194415	0.945795
GOTERM_BP_FAT	GO:0002673~regulation of acute inflammatory response	4	2.17391	0.000763823	FCGR2B, FCER1G, FCGR1, FCGR3	140	18	13588	21.5683	0.657956	0.0208159	1.25155
GOTERM_BP_FAT	GO:0002861~regulation of inflammatory response to antigenic stimulus	4	2.17391	0.000763823	FCGR2B, FCER1G, FCGR1, FCGR3	140	18	13588	21.5683	0.657956	0.0208159	1.25155
INTERPRO	IPR013282:Apoptosis regulator, Bcl-2 related	3	1.63043	0.000792072	BCL2A1D, BCL2A1B, BCL2A1A	161	5	17763	66.1975	0.256474	0.0714101	1.08844
GOTERM_BP_FAT	GO:0045087~innate immune response	7	3.80435	0.000797485	C1QA, SLC11A1, TMEM173, TLR13, CLEC7A, TLR7, FCGR1	140	107	13588	6.34953	0.673758	0.0213103	1.30637
GOTERM_BP_FAT	GO:0042742~defense response to bacterium	7	3.80435	0.000837401	SLC11A1, NCF1, HCK, IRF8, MYO1F, FCER1G, FCGR1	140	108	13588	6.29074	0.691553	0.0219481	1.37133
GOTERM_BP_FAT	GO:0016192~vesicle-mediated transport	14	7.6087	0.000982145	PLEK, HCK, MYO1F, WAS, FCGR1, FCGR3, SLC11A1, ADRB2, LAT2, FCGR2B, IRF8, FCER1G, CLEC7A, MERTK	140	466	13588	2.91588	0.748323	0.0252247	1.60656
GOTERM_BP_FAT	GO:0042590~antigen processing and presentation of exogenous peptide antigen via MHC class I	3	1.63043	0.0010182	FCER1G, FCGR1, FCGR3	140	5	13588	58.2343	0.760759	0.0256699	1.66508
SP_PIR_KEYWORDS	lipoprotein	15	8.15217	0.00103121	GNA13, LY6C1, CPM, LYN, HCK, PHKA1, CD52, LY6C2, CD48, RNF125, ADRB2, LAT2, RAC2, RAB10, ARL4D, CD14	164	589	17854	2.77248	0.219343	0.0244579	1.3229
GOTERM_BP_FAT	GO:0050865~regulation of cell activation	8	4.34783	0.00110642	PTPRC, IKZF1, PLEK, H2-OA, FCGR2B, TNFRSF13B, FCER1G, INPP5D	140	156	13588	4.97729	0.788657	0.0273732	1.80811
SP_PIR_KEYWORDS	phosphoprotein	78	42.3913	0.00112239	RNASEN, GNA13, LRRC8A, FERMT3, H2-D1, SELENBP1, TENC1, TLR7, BTK, LOC100040601, CD48, FAM83D, NDE1, TMEM173, 4632428N05RIK, SLC2A1, ASPG, NIPAL3, CSF2RB, EPSTI1, DPP8, EVI2B, SAP30L, IFNGR1, EGFR, LAIR1, LYN, NCF1, PLD4, WAS, ANKRD13A, CD163, PNPLA7, ARHGAP30, CD84, CD86, ADRB2, LAT2, DCLRE1A, 2810403A07RIK, LCP1, SLC38A2, GSDMD, PHKA1, ITGB2, PAIP2B, E130304F04RIK, SLC11A1, TSC22D3, LPXN, LAPTM5…	164	6311	17854	1.34551	0.236258	0.0242046	1.43909
GOTERM_BP_FAT	GO:0009617~response to bacterium	8	4.34783	0.00114833	SLC11A1, NCF1, HCK, IRF8, MYO1F, FCER1G, FCGR1, CD14	140	157	13588	4.94559	0.800749	0.0279048	1.876
GOTERM_CC_FAT	GO:0005773~vacuole	9	4.8913	0.00123611	PNPLA7, PLEKHF1, SLC11A1, MFSD8, LAPTM5, MT1, ACP2, CTSS, SLC15A3	130	204	12504	4.24344	0.207476	0.038014	1.52286
GOTERM_BP_FAT	GO:0051130~positive regulation of cellular component organization	7	3.80435	0.00157465	SLC11A1, PLEK, FCGR2B, FCER1G, CLEC7A, FCGR1, FCGR3	140	122	13588	5.56885	0.890579	0.037429	2.56401
GOTERM_BP_FAT	GO:0060627~regulation of vesicle-mediated transport	6	3.26087	0.00159703	SLC11A1, FCGR2B, FCER1G, CLEC7A, FCGR1, FCGR3	140	83	13588	7.01618	0.893969	0.03732	2.6
SP_PIR_KEYWORDS	immunoglobulin receptor	3	1.63043	0.0016881	FCGR2B, FCGR1, FCGR3	164	7	17854	46.6568	0.333348	0.0332261	2.15715
GOTERM_BP_FAT	GO:0050729~positive regulation of inflammatory response	4	2.17391	0.00181147	TGM2, FCER1G, FCGR1, FCGR3	140	24	13588	16.1762	0.921575	0.0415394	2.94423
GOTERM_BP_FAT	GO:0045639~positive regulation of myeloid cell differentiation	4	2.17391	0.00204318	IKZF1, CSF1, INPP5D, RUNX1	140	25	13588	15.5291	0.943389	0.0459839	3.31491
SP_PIR_KEYWORDS	lysosome	7	3.80435	0.00208859	PNPLA7, PLEKHF1, MFSD8, LAPTM5, ACP2, CTSS, SLC15A3	164	144	17854	5.29209	0.394552	0.0378635	2.66258
KEGG_PATHWAY	mmu04060:Cytokine-cytokine receptor interaction	10	5.43478	0.00214977	EGFR, IL10RA, CSF1, TNFRSF13B, CCL9, CCL19, CSF2RB, IFNGR1, CSF1R, CCL6	69	244	5738	3.40817	0.184903	0.0971728	2.33782
INTERPRO	IPR008266:Tyrosine protein kinase, active site	6	3.26087	0.00220178	EGFR, LYN, HCK, MERTK, CSF1R, BTK	161	101	17763	6.55421	0.56149	0.152	2.99848
GOTERM_BP_FAT	GO:0051050~positive regulation of transport	7	3.80435	0.00234757	SLC11A1, FCGR2B, ANG, FCER1G, CLEC7A, FCGR1, FCGR3	140	132	13588	5.14697	0.963112	0.051832	3.79983
GOTERM_BP_FAT	GO:0032680~regulation of tumor necrosis factor production	4	2.17391	0.00255992	FCER1G, CLEC7A, CD14, FCGR3	140	27	13588	14.3788	0.972642	0.0555218	4.13677
GOTERM_BP_FAT	GO:0008284~positive regulation of cell proliferation	10	5.43478	0.00257639	EGFR, PTPRC, ADRB2, LYN, RAC2, ANG, HCLS1, CSF1, EDN1, TGM2	140	284	13588	3.41751	0.973269	0.0550209	4.16287
GOTERM_BP_FAT	GO:0042592~homeostatic process	15	8.15217	0.00262522	PTPRC, GCLC, LYN, CSF1, HCLS1, EDN1, TNFRSF13B, TENC1, SLC11A1, ADRB2, BCL2A1A, MT2, TGM2, LGI4, MT1	140	584	13588	2.49291	0.975044	0.0551975	4.24017
KEGG_PATHWAY	mmu04664:Fc epsilon RI signaling pathway	6	3.26087	0.00271649	LYN, RAC2, FCER1G, INPP5D, PLA2G3, BTK	69	82	5738	6.08484	0.227727	0.0825335	2.94578
SP_PIR_KEYWORDS	sh3 domain	8	4.34783	0.00271697	FYB, LYN, NCF2, NCF1, HCK, HCLS1, MYO1F, BTK	164	204	17854	4.26925	0.479498	0.0455691	3.45076
GOTERM_BP_FAT	GO:0031349~positive regulation of defense response	5	2.71739	0.00272246	TGM2, FCER1G, CLEC7A, FCGR1, FCGR3	140	57	13588	8.51378	0.978237	0.0563435	4.39393
GOTERM_BP_FAT	GO:0002894~positive regulation of type II hypersensitivity	3	1.63043	0.00279403	FCER1G, FCGR1, FCGR3	140	8	13588	36.3964	0.980323	0.0569458	4.50696
GOTERM_BP_FAT	GO:0001810~regulation of type I hypersensitivity	3	1.63043	0.00279403	FCGR2B, FCER1G, FCGR3	140	8	13588	36.3964	0.980323	0.0569458	4.50696
GOTERM_BP_FAT	GO:0001796~regulation of type IIa hypersensitivity	3	1.63043	0.00279403	FCER1G, FCGR1, FCGR3	140	8	13588	36.3964	0.980323	0.0569458	4.50696
GOTERM_BP_FAT	GO:0002888~positive regulation of myeloid leukocyte mediated immunity	3	1.63043	0.00279403	FCER1G, FCGR1, FCGR3	140	8	13588	36.3964	0.980323	0.0569458	4.50696
GOTERM_BP_FAT	GO:0002892~regulation of type II hypersensitivity	3	1.63043	0.00279403	FCER1G, FCGR1, FCGR3	140	8	13588	36.3964	0.980323	0.0569458	4.50696
GOTERM_BP_FAT	GO:0001798~positive regulation of type IIa hypersensitivity	3	1.63043	0.00279403	FCER1G, FCGR1, FCGR3	140	8	13588	36.3964	0.980323	0.0569458	4.50696
GOTERM_BP_FAT	GO:0042098~T cell proliferation	4	2.17391	0.00284581	PTPRC, SLC11A1, CD86, ITGB2	140	28	13588	13.8653	0.981707	0.0571438	4.58866
GOTERM_BP_FAT	GO:0001817~regulation of cytokine production	7	3.80435	0.00303829	SLC11A1, FCER1G, INPP5D, CLEC7A, TLR7, CD14, FCGR3	140	139	13588	4.88777	0.98605	0.0600388	4.89176
INTERPRO	IPR001452:Src homology-3 domain	8	4.34783	0.00304776	FYB, LYN, NCF2, NCF1, HCK, HCLS1, MYO1F, BTK	161	211	17763	4.1831	0.680693	0.173262	4.12824
KEGG_PATHWAY	mmu04650:Natural killer cell mediated cytotoxicity	7	3.80435	0.00304892	CD48, RAC2, H2-D1, FCER1G, ITGB2, IFNGR1, FCGR3	69	122	5738	4.77144	0.251804	0.0699551	3.3008
GOTERM_BP_FAT	GO:0002761~regulation of myeloid leukocyte differentiation	4	2.17391	0.00315062	IKZF1, CSF1, INPP5D, RUNX1	140	29	13588	13.3872	0.988091	0.0613308	5.06823
INTERPRO	IPR015631:Signalling lymphocyte activation molecule	3	1.63043	0.00346024	CD84, CD48, SLAMF9	161	10	17763	33.0988	0.726478	0.169059	4.67464
GOTERM_BP_FAT	GO:0001819~positive regulation of cytokine production	5	2.71739	0.00369668	SLC11A1, FCER1G, CLEC7A, TLR7, CD14	140	62	13588	7.82719	0.994482	0.0706185	5.92173
GOTERM_BP_FAT	GO:0002366~leukocyte activation during immune response	4	2.17391	0.00381848	SLC11A1, LAT2, MYO1F, LCP1	140	31	13588	12.5235	0.995352	0.071888	6.11112
GOTERM_BP_FAT	GO:0002263~cell activation during immune response	4	2.17391	0.00381848	SLC11A1, LAT2, MYO1F, LCP1	140	31	13588	12.5235	0.995352	0.071888	6.11112
GOTERM_BP_FAT	GO:0043065~positive regulation of apoptosis	9	4.8913	0.00397974	PLEKHF1, PTPRC, ADRB2, NUPR1, CYCS, TGM2, INPP5D, FCGR1, FCGR3	140	248	13588	3.52224	0.996297	0.0738272	6.36131
SP_PIR_KEYWORDS	transmembrane	65	35.3261	0.00402206	GPR160, LRRC8A, H2-D1, TLR7, SLC7A7, SEZ6L2, TMEM173, KCNK6, 4632428N05RIK, CH25H, SLC2A1, NIPAL3, CSF2RB, EVI2B, AF251705, IFNGR1, EGFR, LAIR1, PLD4, ADIPOR2, CLEC4N, CD163, PNPLA7, GABRR2, CD84, CD86, ADRB2, LAT2, CD33, CLEC5A, C3AR1, SLC38A2, MFSD8, CSF1, ITGB2, PAQR8, ACP2, SLC11A1, P2RY6, LAPTM5, ALOX5AP, IL10RA, FCER1G, PEX12, ENTPD1, CSF1R, HAVCR2, SCD1, PTPRC, SLAMF9, TNFRSF13B, TLR13, FZ…	164	5237	17854	1.35121	0.61987	0.0624478	5.06896
GOTERM_BP_FAT	GO:0043068~positive regulation of programmed cell death	9	4.8913	0.0041764	PLEKHF1, PTPRC, ADRB2, NUPR1, CYCS, TGM2, INPP5D, FCGR1, FCGR3	140	250	13588	3.49406	0.997194	0.0763339	6.66559
GOTERM_BP_FAT	GO:0030888~regulation of B cell proliferation	4	2.17391	0.00418226	PTPRC, FCGR2B, TNFRSF13B, INPP5D	140	32	13588	12.1321	0.997217	0.0754574	6.67465
SP_PIR_KEYWORDS	tyrosine-protein kinase	6	3.26087	0.00424007	EGFR, LYN, HCK, MERTK, CSF1R, BTK	164	116	17854	5.63099	0.639326	0.0617475	5.33681
GOTERM_BP_FAT	GO:0010942~positive regulation of cell death	9	4.8913	0.00438049	PLEKHF1, PTPRC, ADRB2, NUPR1, CYCS, TGM2, INPP5D, FCGR1, FCGR3	140	252	13588	3.46633	0.997896	0.0778999	6.98037
GOTERM_BP_FAT	GO:0002706~regulation of lymphocyte mediated immunity	5	2.71739	0.00438221	PTPRC, FCGR2B, FCER1G, FCGR1, FCGR3	140	65	13588	7.46593	0.997901	0.0769572	6.98302
GOTERM_BP_FAT	GO:0002885~positive regulation of hypersensitivity	3	1.63043	0.00443054	FCER1G, FCGR1, FCGR3	140	10	13588	29.1171	0.998039	0.0768162	7.05742
GOTERM_BP_FAT	GO:0002866~positive regulation of acute inflammatory response to antigenic stimulus	3	1.63043	0.00443054	FCER1G, FCGR1, FCGR3	140	10	13588	29.1171	0.998039	0.0768162	7.05742
GOTERM_BP_FAT	GO:0030889~negative regulation of B cell proliferation	3	1.63043	0.00443054	FCGR2B, TNFRSF13B, INPP5D	140	10	13588	29.1171	0.998039	0.0768162	7.05742
KEGG_PATHWAY	mmu05416:Viral myocarditis	6	3.26087	0.00490009	CD86, RAC2, H2-OA, CYCS, H2-D1, ITGB2	69	94	5738	5.30805	0.372902	0.0891077	5.25626
SP_PIR_KEYWORDS	innate immunity	5	2.71739	0.00492178	C1QA, TMEM173, TLR13, CLEC7A, FCGR1	164	75	17854	7.25772	0.693992	0.067285	6.16993
GOTERM_BP_FAT	GO:0002694~regulation of leukocyte activation	7	3.80435	0.00501772	PTPRC, IKZF1, H2-OA, FCGR2B, TNFRSF13B, FCER1G, INPP5D	140	154	13588	4.41169	0.999143	0.0855204	7.95682
INTERPRO	IPR001245:Tyrosine protein kinase	6	3.26087	0.00530846	EGFR, LYN, HCK, MERTK, CSF1R, BTK	161	124	17763	5.33851	0.863394	0.220289	7.08764
GOTERM_BP_FAT	GO:0002675~positive regulation of acute inflammatory response	3	1.63043	0.00537894	FCER1G, FCGR1, FCGR3	140	11	13588	26.4701	0.999486	0.0903134	8.50604
KEGG_PATHWAY	mmu04062:Chemokine signaling pathway	8	4.34783	0.00544937	LYN, RAC2, NCF1, HCK, CCL9, CCL19, WAS, CCL6	69	182	5738	3.65536	0.404948	0.0828807	5.82954
GOTERM_BP_FAT	GO:0007242~intracellular signaling cascade	19	10.3261	0.00559718	GNA13, PTPRC, PLEK, LYN, EDN1, ADIPOR2, TENC1, BTK, SLC11A1, ADRB2, LAT2, NUPR1, RAC2, MT2, TGM2, MT1, INPP5D, RAB10, ARL4D	140	915	13588	2.01539	0.999622	0.0927075	8.83638
GOTERM_CC_FAT	GO:0031225~anchored to membrane	8	4.34783	0.00561702	LY6C1, CD48, GNA13, CPM, RAC2, HCK, CD52, CD14, LY6C2	130	207	12504	3.71728	0.653189	0.140395	6.75
GOTERM_BP_FAT	GO:0002703~regulation of leukocyte mediated immunity	5	2.71739	0.00570673	PTPRC, FCGR2B, FCER1G, FCGR1, FCGR3	140	70	13588	6.93265	0.999676	0.0933422	9.00177
GOTERM_BP_FAT	GO:0050851~antigen receptor-mediated signaling pathway	4	2.17391	0.00584413	PTPRC, BCL2A1D, LAT2, LYN	140	36	13588	10.7841	0.999733	0.0943908	9.20882
GOTERM_BP_FAT	GO:0001909~leukocyte mediated cytotoxicity	3	1.63043	0.00641164	NCF1, FCGR1, FCGR3	140	12	13588	24.2643	0.99988	0.101933	10.0593
SP_PIR_KEYWORDS	transmembrane protein	10	5.43478	0.00701283	EGFR, PTPRC, ADRB2, FCGR2B, H2-D1, CSF2RB, FCGR1, IFNGR1, CSF1R, FCGR3	164	370	17854	2.94232	0.815298	0.089566	8.68335
INTERPRO	IPR008957:Fibronectin, type III-like fold	7	3.80435	0.00702815	PTPRC, IL10RA, F13A1, TGM2, CSF2RB, MERTK, IFNGR1	161	187	17763	4.12997	0.928482	0.254045	9.28183
KEGG_PATHWAY	mmu05322:Systemic lupus erythematosus	6	3.26087	0.00720196	C1QA, CD86, H2-OA, FCGR2B, FCGR1, FCGR3	69	103	5738	4.84424	0.496747	0.0934368	7.63765
GOTERM_BP_FAT	GO:0032103~positive regulation of response to external stimulus	4	2.17391	0.0073157	TGM2, FCER1G, FCGR1, FCGR3	140	39	13588	9.95458	0.999967	0.114216	11.3987
GOTERM_BP_FAT	GO:0002763~positive regulation of myeloid leukocyte differentiation	3	1.63043	0.00752686	IKZF1, CSF1, RUNX1	140	13	13588	22.3978	0.999975	0.116042	11.7088
GOTERM_BP_FAT	GO:0006910~phagocytosis, recognition	3	1.63043	0.00752686	CLEC7A, FCGR1, FCGR3	140	13	13588	22.3978	0.999975	0.116042	11.7088
GOTERM_BP_FAT	GO:0002863~positive regulation of inflammatory response to antigenic stimulus	3	1.63043	0.00752686	FCER1G, FCGR1, FCGR3	140	13	13588	22.3978	0.999975	0.116042	11.7088
INTERPRO	IPR002475:BCL2-like apoptosis inhibitor	3	1.63043	0.00783896	BCL2A1D, BCL2A1B, BCL2A1A	161	15	17763	22.0658	0.94731	0.254971	10.2996
GOTERM_BP_FAT	GO:0002708~positive regulation of lymphocyte mediated immunity	4	2.17391	0.00785047	PTPRC, FCER1G, FCGR1, FCGR3	140	40	13588	9.70571	0.999984	0.119434	12.1822
GOTERM_BP_FAT	GO:0002705~positive regulation of leukocyte mediated immunity	4	2.17391	0.00785047	PTPRC, FCER1G, FCGR1, FCGR3	140	40	13588	9.70571	0.999984	0.119434	12.1822
GOTERM_BP_FAT	GO:0006937~regulation of muscle contraction	4	2.17391	0.00840774	ADRB2, NCF1, EDN1, CASQ1	140	41	13588	9.46899	0.999993	0.12603	12.9916
GOTERM_BP_FAT	GO:0009967~positive regulation of signal transduction	7	3.80435	0.0084848	PTPRC, ADRB2, LYN, HCLS1, CSF1, TMOD2, TGM2	140	172	13588	3.95	0.999994	0.125778	13.103
GOTERM_BP_FAT	GO:0050853~B cell receptor signaling pathway	3	1.63043	0.00872282	PTPRC, LAT2, LYN	140	14	13588	20.798	0.999995	0.127745	13.4462
GOTERM_BP_FAT	GO:0046651~lymphocyte proliferation	4	2.17391	0.00898771	PTPRC, SLC11A1, CD86, ITGB2	140	42	13588	9.24354	0.999997	0.130028	13.8266
SMART	SM00326:SH3	8	4.34783	0.00922613	FYB, LYN, NCF2, NCF1, HCK, HCLS1, MYO1F, BTK	103	211	9131	3.36116	0.596814	0.365031	9.74109
GOTERM_BP_FAT	GO:0002526~acute inflammatory response	5	2.71739	0.00950225	C1QA, NUPR1, FCGR1, CD163, FCGR3	140	81	13588	5.99118	0.999998	0.135588	14.5611
GOTERM_BP_FAT	GO:0032943~mononuclear cell proliferation	4	2.17391	0.00959056	PTPRC, SLC11A1, CD86, ITGB2	140	43	13588	9.02857	0.999999	0.135397	14.6866
GOTERM_BP_FAT	GO:0070661~leukocyte proliferation	4	2.17391	0.00959056	PTPRC, SLC11A1, CD86, ITGB2	140	43	13588	9.02857	0.999999	0.135397	14.6866
GOTERM_BP_FAT	GO:0032760~positive regulation of tumor necrosis factor production	3	1.63043	0.00999778	FCER1G, CLEC7A, CD14	140	15	13588	19.4114	0.999999	0.139361	15.2629
GOTERM_BP_FAT	GO:0002886~regulation of myeloid leukocyte mediated immunity	3	1.63043	0.00999778	FCER1G, FCGR1, FCGR3	140	15	13588	19.4114	0.999999	0.139361	15.2629
UP_SEQ_FEATURE	domain:Ig-like C2-type 1	6	3.26087	0.0103363	CD48, FCGR2B, MERTK, FCGR1, CSF1R, FCGR3	163	130	16021	4.53639	0.996065	0.546668	14.0123
GOTERM_CC_FAT	GO:0043235~receptor complex	5	2.71739	0.0106113	ADRB2, CSF1, ITGB2, CD14, CSF1R	130	83	12504	5.79425	0.865417	0.221742	12.3971
UP_SEQ_FEATURE	domain:Ig-like C2-type 2	6	3.26087	0.010661	CD48, FCGR2B, MERTK, FCGR1, CSF1R, FCGR3	163	131	16021	4.50176	0.996697	0.510368	14.4213
GOTERM_BP_FAT	GO:0002495~antigen processing and presentation of peptide antigen via MHC class II	3	1.63043	0.01135	H2-OA, FCGR2B, FCER1G	140	16	13588	18.1982	1	0.155238	17.1506
GOTERM_BP_FAT	GO:0001906~cell killing	3	1.63043	0.01135	NCF1, FCGR1, FCGR3	140	16	13588	18.1982	1	0.155238	17.1506
GOTERM_BP_FAT	GO:0030168~platelet activation	3	1.63043	0.01135	GNA13, PLEK, ENTPD1	140	16	13588	18.1982	1	0.155238	17.1506
GOTERM_BP_FAT	GO:0019886~antigen processing and presentation of exogenous peptide antigen via MHC class II	3	1.63043	0.01135	H2-OA, FCGR2B, FCER1G	140	16	13588	18.1982	1	0.155238	17.1506
GOTERM_BP_FAT	GO:0007626~locomotory behavior	8	4.34783	0.0114665	C3AR1, RAC2, CCL9, FCER1G, CCL19, ITGB2, FCGR3, CCL6	140	239	13588	3.24877	1	0.155209	17.3113
GOTERM_CC_FAT	GO:0045121~membrane raft	5	2.71739	0.0115101	ADRB2, LAT2, FCER1G, ITGB2, CD14	130	85	12504	5.65792	0.886556	0.214808	13.3794
GOTERM_BP_FAT	GO:0002699~positive regulation of immune effector process	4	2.17391	0.0115381	PTPRC, FCER1G, FCGR1, FCGR3	140	46	13588	8.43975	1	0.154626	17.41
GOTERM_BP_FAT	GO:0030005~cellular di-, tri-valent inorganic cation homeostasis	6	3.26087	0.0121588	PTPRC, SLC11A1, EDN1, MT2, TGM2, MT1	140	134	13588	4.34584	1	0.160763	18.2607
SMART	SM00219:TyrKc	6	3.26087	0.0124558	EGFR, LYN, HCK, MERTK, CSF1R, BTK	103	124	9131	4.28954	0.707221	0.335982	12.9415
SP_PIR_KEYWORDS	ATP	6	3.26087	0.0125138	EGFR, LYN, PHKG1, RUNX1, MERTK, CSF1R	164	151	17854	4.3258	0.951309	0.147061	15.0019
GOTERM_BP_FAT	GO:0010740~positive regulation of protein kinase cascade	5	2.71739	0.0126115	PTPRC, ADRB2, LYN, HCLS1, TGM2	140	88	13588	5.51461	1	0.164723	18.8759
GOTERM_BP_FAT	GO:0002697~regulation of immune effector process	5	2.71739	0.0126115	PTPRC, FCGR2B, FCER1G, FCGR1, FCGR3	140	88	13588	5.51461	1	0.164723	18.8759
GOTERM_BP_FAT	GO:0030593~neutrophil chemotaxis	3	1.63043	0.0127779	FCER1G, ITGB2, FCGR3	140	17	13588	17.1277	1	0.165195	19.1009
GOTERM_BP_FAT	GO:0050869~negative regulation of B cell activation	3	1.63043	0.0127779	FCGR2B, TNFRSF13B, INPP5D	140	17	13588	17.1277	1	0.165195	19.1009
GOTERM_MF_FAT	GO:0046983~protein dimerization activity	9	4.8913	0.0130845	ATF5, ADRB2, GCLC, IKZF1, CEBPD, CSF1, ADIPOR2, ITGB2, CSF1R	123	340	13288	2.85968	0.984828	0.567281	16.2694
GOTERM_BP_FAT	GO:0010647~positive regulation of cell communication	7	3.80435	0.0130933	PTPRC, ADRB2, LYN, HCLS1, CSF1, TMOD2, TGM2	140	189	13588	3.59471	1	0.167408	19.5259
GOTERM_BP_FAT	GO:0050878~regulation of body fluid levels	5	2.71739	0.0131027	GNA13, PLEK, F13A1, EDN1, ENTPD1	140	89	13588	5.45265	1	0.16602	19.5385
UP_SEQ_FEATURE	domain:SH2	5	2.71739	0.0131381	LYN, HCK, INPP5D, TENC1, BTK	163	90	16021	5.46046	0.999132	0.54307	17.4824
GOTERM_BP_FAT	GO:0044093~positive regulation of molecular function	9	4.8913	0.0133869	PTPRC, SLC11A1, ADRB2, ANG, CSF1, EDN1, CYCS, TGM2, ITGB2	140	306	13588	2.85462	1	0.167823	19.9196
BIOCARTA	m_blymphocytePathway:B Lymphocyte Cell Surface Molecules	3	1.63043	0.0141297	PTPRC, FCGR2B, ITGB2	29	8	1171	15.1422	0.620035	0.620035	13.6188
KEGG_PATHWAY	mmu04662:B cell receptor signaling pathway	5	2.71739	0.0145326	LYN, RAC2, FCGR2B, INPP5D, BTK	69	80	5738	5.19746	0.751105	0.159569	14.8636
GOTERM_BP_FAT	GO:0030097~hemopoiesis	8	4.34783	0.0146827	PTPRC, BCL2A1D, IKZF1, LYN, LRRC8A, HCLS1, IRF8, RUNX1	140	251	13588	3.09345	1	0.181013	21.6357
SP_PIR_KEYWORDS	SH2 domain	5	2.71739	0.0147231	LYN, HCK, INPP5D, TENC1, BTK	164	103	17854	5.28475	0.971556	0.16305	17.424
GOTERM_CC_FAT	GO:0044459~plasma membrane part	27	14.6739	0.015119	GNA13, PHKA1, H2-D1, ITGB2, TENC1, CD48, LAPTM5, SLC2A1, FCER1G, EGFR, LY6C1, PTPRC, TNFRSF13B, GJB6, SLCO2B1, FCGR1, LY6C2, GABRR2, COG4, ADRB2, CD86, EMR1, FCGR2B, H2-OA, ABCC3, CLEC7A, RAB10, LCP1	130	1633	12504	1.59032	0.942964	0.249044	17.2224
INTERPRO	IPR000827:Small chemokine, C-C group, conserved site	3	1.63043	0.0151342	CCL9, CCL19, CCL6	161	21	17763	15.7613	0.996666	0.404585	18.9923
GOTERM_BP_FAT	GO:0045637~regulation of myeloid cell differentiation	4	2.17391	0.0152555	IKZF1, CSF1, INPP5D, RUNX1	140	51	13588	7.61232	1	0.185809	22.3832
SP_PIR_KEYWORDS	cytokine receptor	3	1.63043	0.0155252	IL10RA, CSF2RB, IFNGR1	164	21	17854	15.5523	0.976606	0.163746	18.2875
GOTERM_BP_FAT	GO:0002504~antigen processing and presentation of peptide or polysaccharide antigen via MHC class II	3	1.63043	0.0158536	H2-OA, FCGR2B, FCER1G	140	19	13588	15.3248	1	0.190767	23.1565
GOTERM_BP_FAT	GO:0051249~regulation of lymphocyte activation	6	3.26087	0.016176	PTPRC, IKZF1, H2-OA, FCGR2B, TNFRSF13B, INPP5D	140	144	13588	4.04405	1	0.192642	23.5704
GOTERM_BP_FAT	GO:0050730~regulation of peptidyl-tyrosine phosphorylation	4	2.17391	0.01691	EGFR, PTPRC, LYN, HCLS1	140	53	13588	7.32507	1	0.198852	24.5048
SP_PIR_KEYWORDS	acetylated amino end	3	1.63043	0.0169764	CYCS, MT2, MT1	164	22	17854	14.8453	0.983581	0.17038	19.8287
GOTERM_BP_FAT	GO:0055066~di-, tri-valent inorganic cation homeostasis	6	3.26087	0.0170594	PTPRC, SLC11A1, EDN1, MT2, TGM2, MT1	140	146	13588	3.98865	1	0.198791	24.6937
KEGG_PATHWAY	mmu04640:Hematopoietic cell lineage	5	2.71739	0.0171176	CD33, CSF1, FCGR1, CD14, CSF1R	69	84	5738	4.94997	0.806068	0.166607	17.2864
GOTERM_MF_FAT	GO:0042802~identical protein binding	8	4.34783	0.0174856	ADRB2, NDE1, CEBPD, CSF1, ADIPOR2, WAS, LCP1, CSF1R	123	290	13288	2.98021	0.996337	0.607388	21.1656
GOTERM_MF_FAT	GO:0004713~protein tyrosine kinase activity	6	3.26087	0.0175844	EGFR, LYN, HCK, MERTK, CSF1R, BTK	123	164	13288	3.95241	0.996453	0.553332	21.2724
GOTERM_BP_FAT	GO:0043085~positive regulation of catalytic activity	8	4.34783	0.0178186	PTPRC, SLC11A1, ADRB2, ANG, CSF1, EDN1, CYCS, TGM2	140	261	13588	2.97493	1	0.205054	25.6467
GOTERM_BP_FAT	GO:0006873~cellular ion homeostasis	8	4.34783	0.0178186	PTPRC, SLC11A1, GCLC, EDN1, MT2, TGM2, MT1, LGI4	140	261	13588	2.97493	1	0.205054	25.6467
INTERPRO	IPR000712:Apoptosis regulator Bcl-2, BH	3	1.63043	0.0180205	BCL2A1D, BCL2A1B, BCL2A1A	161	23	17763	14.3908	0.998887	0.43264	22.2103
INTERPRO	IPR000980:SH2 motif	5	2.71739	0.0180485	LYN, HCK, INPP5D, TENC1, BTK	161	111	17763	4.96978	0.998899	0.407844	22.241
UP_SEQ_FEATURE	domain:Ig-like C2-type	5	2.71739	0.0180593	CD84, LAIR1, CD86, SLAMF9, CD33	163	99	16021	4.96406	0.99994	0.621431	23.2637
GOTERM_MF_FAT	GO:0019770~IgG receptor activity	2	1.08696	0.0182788	FCGR1, FCGR3	123	2	13288	108.033	0.997167	0.519681	22.0194
GOTERM_BP_FAT	GO:0050864~regulation of B cell activation	4	2.17391	0.0186611	PTPRC, FCGR2B, TNFRSF13B, INPP5D	140	55	13588	7.0587	1	0.212008	26.6909
SP_PIR_KEYWORDS	chemotaxis	4	2.17391	0.0190724	C3AR1, CCL9, CCL19, CCL6	164	62	17854	7.0236	0.990163	0.182037	22.0073
GOTERM_BP_FAT	GO:0030003~cellular cation homeostasis	6	3.26087	0.0199447	PTPRC, SLC11A1, EDN1, MT2, TGM2, MT1	140	152	13588	3.8312	1	0.223181	28.2555
GOTERM_BP_FAT	GO:0050867~positive regulation of cell activation	5	2.71739	0.0199618	PTPRC, IKZF1, PLEK, FCER1G, INPP5D	140	101	13588	4.80481	1	0.221612	28.2762
GOTERM_MF_FAT	GO:0004620~phospholipase activity	4	2.17391	0.0201104	PNPLA7, PLD4, ASPG, PLA2G3	123	63	13288	6.85921	0.998436	0.51218	23.9581
GOTERM_BP_FAT	GO:0055082~cellular chemical homeostasis	8	4.34783	0.0202774	PTPRC, SLC11A1, GCLC, EDN1, MT2, TGM2, MT1, LGI4	140	268	13588	2.89723	1	0.222988	28.6559
GOTERM_BP_FAT	GO:0007263~nitric oxide mediated signal transduction	2	1.08696	0.0203553	MT2, MT1	140	2	13588	97.0571	1	0.222037	28.7494
GOTERM_BP_FAT	GO:0045658~regulation of neutrophil differentiation	2	1.08696	0.0203553	IKZF1, INPP5D	140	2	13588	97.0571	1	0.222037	28.7494
GOTERM_BP_FAT	GO:0030854~positive regulation of granulocyte differentiation	2	1.08696	0.0203553	IKZF1, RUNX1	140	2	13588	97.0571	1	0.222037	28.7494
GOTERM_BP_FAT	GO:0045619~regulation of lymphocyte differentiation	4	2.17391	0.0214695	PTPRC, IKZF1, H2-OA, INPP5D	140	58	13588	6.6936	1	0.231016	30.0733
GOTERM_BP_FAT	GO:0010627~regulation of protein kinase cascade	6	3.26087	0.0214987	PTPRC, ADRB2, LYN, HCLS1, TGM2, CBS	140	155	13588	3.75705	1	0.229564	30.1078
INTERPRO	IPR013151:Immunoglobulin	6	3.26087	0.0226108	CD48, FCGR2B, MERTK, FCGR1, CSF1R, FCGR3	161	178	17763	3.71896	0.999807	0.457173	27.085
GOTERM_BP_FAT	GO:0051094~positive regulation of developmental process	7	3.80435	0.0226985	PTPRC, ADRB2, IKZF1, CSF1, ITGB2, INPP5D, RUNX1	140	214	13588	3.17477	1	0.239049	31.5069
GOTERM_BP_FAT	GO:0050830~defense response to Gram-positive bacterium	3	1.63043	0.0228407	NCF1, HCK, MYO1F	140	23	13588	12.6596	1	0.238609	31.6711
GOTERM_BP_FAT	GO:0000096~sulfur amino acid metabolic process	3	1.63043	0.0228407	GCLC, MAT2A, CBS	140	23	13588	12.6596	1	0.238609	31.6711
GOTERM_BP_FAT	GO:0007610~behavior	10	5.43478	0.0233248	C3AR1, RAC2, TMOD2, CCL9, FCER1G, CCL19, ITGB2, RUNX1, FCGR3, CCL6	140	405	13588	2.39647	1	0.241288	32.2268
GOTERM_BP_FAT	GO:0032844~regulation of homeostatic process	4	2.17391	0.0234633	PTPRC, GCLC, FCER1G, INPP5D	140	60	13588	6.47048	1	0.240805	32.385
PIR_SUPERFAMILY	PIRSF001950:small inducible chemokine, C/CC types	3	1.63043	0.0240489	CCL9, CCL19, CCL6	95	21	8136	12.2346	0.936119	0.936119	24.1487
GOTERM_BP_FAT	GO:0019725~cellular homeostasis	9	4.8913	0.0246941	PTPRC, SLC11A1, GCLC, EDN1, MT2, TGM2, MT1, LGI4, TENC1	140	343	13588	2.54669	1	0.250052	33.776
GOTERM_BP_FAT	GO:0032268~regulation of cellular protein metabolic process	8	4.34783	0.0250286	EGFR, PTPRC, GCLC, LYN, ANG, HCLS1, CBS, PAIP2B	140	280	13588	2.77306	1	0.251234	34.1495
UP_SEQ_FEATURE	domain:SH3	6	3.26087	0.0250337	FYB, LYN, HCK, HCLS1, MYO1F, BTK	163	163	16021	3.61798	0.999999	0.70725	30.8135
GOTERM_MF_FAT	GO:0046982~protein heterodimerization activity	5	2.71739	0.0252617	GCLC, IKZF1, CEBPD, ADIPOR2, ITGB2	123	121	13288	4.46415	0.999707	0.55676	29.1742
GOTERM_BP_FAT	GO:0048534~hemopoietic or lymphoid organ development	8	4.34783	0.0254563	PTPRC, BCL2A1D, IKZF1, LYN, LRRC8A, HCLS1, IRF8, RUNX1	140	281	13588	2.76319	1	0.253204	34.6239
GOTERM_BP_FAT	GO:0006940~regulation of smooth muscle contraction	3	1.63043	0.0267272	ADRB2, NCF1, EDN1	140	25	13588	11.6469	1	0.262349	36.0151
SMART	SM00337:BCL	3	1.63043	0.0268396	BCL2A1D, BCL2A1B, BCL2A1A	103	23	9131	11.5631	0.930485	0.486525	25.9791
GOTERM_MF_FAT	GO:0030246~carbohydrate binding	8	4.34783	0.0268647	PTPRC, LYVE1, ANG, CRISPLD2, CD33, CLEC7A, CLEC5A, CLEC4N	123	317	13288	2.72637	0.999827	0.544908	30.7284
SP_PIR_KEYWORDS	gpi-anchor	5	2.71739	0.0270085	LY6C1, CD48, CPM, CD52, CD14, LY6C2	164	124	17854	4.38975	0.9986	0.239515	29.7708
SP_PIR_KEYWORDS	kinase-related transforming protein	2	1.08696	0.027141	EGFR, CSF1R	164	3	17854	72.5772	0.998645	0.232146	29.8942
GOTERM_BP_FAT	GO:0031399~regulation of protein modification process	6	3.26087	0.0272417	EGFR, PTPRC, GCLC, LYN, HCLS1, CBS	140	165	13588	3.52935	1	0.26491	36.5704
GOTERM_BP_FAT	GO:0042060~wound healing	5	2.71739	0.0278899	GNA13, SLC11A1, PLEK, F13A1, ENTPD1	140	112	13588	4.33291	1	0.268536	37.2634
GOTERM_BP_FAT	GO:0048872~homeostasis of number of cells	5	2.71739	0.0286912	LYN, BCL2A1A, HCLS1, CSF1, TNFRSF13B	140	113	13588	4.29456	1	0.27335	38.1104
GOTERM_BP_FAT	GO:0010518~positive regulation of phospholipase activity	3	1.63043	0.0287635	ANG, EDN1, TGM2	140	26	13588	11.1989	1	0.272138	38.1862
GOTERM_BP_FAT	GO:0050777~negative regulation of immune response	3	1.63043	0.0287635	PTPRC, FCGR2B, INPP5D	140	26	13588	11.1989	1	0.272138	38.1862
GOTERM_BP_FAT	GO:0007202~activation of phospholipase C activity	3	1.63043	0.0287635	ANG, EDN1, TGM2	140	26	13588	11.1989	1	0.272138	38.1862
GOTERM_BP_FAT	GO:0010863~positive regulation of phospholipase C activity	3	1.63043	0.0287635	ANG, EDN1, TGM2	140	26	13588	11.1989	1	0.272138	38.1862
GOTERM_BP_FAT	GO:0048585~negative regulation of response to stimulus	4	2.17391	0.0288726	PTPRC, ADRB2, FCGR2B, INPP5D	140	65	13588	5.97275	1	0.271242	38.3005
GOTERM_BP_FAT	GO:0042325~regulation of phosphorylation	8	4.34783	0.0295327	EGFR, PTPRC, SLC11A1, LYN, HCLS1, CSF1, EDN1, CBS	140	290	13588	2.67744	1	0.274784	38.9882
UP_SEQ_FEATURE	region of interest:Alpha	2	1.08696	0.0300313	MT2, MT1	163	3	16021	65.5256	1	0.74188	35.7915
UP_SEQ_FEATURE	region of interest:Beta	2	1.08696	0.0300313	MT2, MT1	163	3	16021	65.5256	1	0.74188	35.7915
GOTERM_MF_FAT	GO:0001871~pattern binding	5	2.71739	0.0302263	PTPRC, LYVE1, ANG, CRISPLD2, CLEC7A	123	128	13288	4.22002	0.999942	0.55663	33.8858
GOTERM_MF_FAT	GO:0030247~polysaccharide binding	5	2.71739	0.0302263	PTPRC, LYVE1, ANG, CRISPLD2, CLEC7A	123	128	13288	4.22002	0.999942	0.55663	33.8858
GOTERM_BP_FAT	GO:0019364~pyridine nucleotide catabolic process	2	1.08696	0.0303782	NCF2, NCF1	140	3	13588	64.7048	1	0.279726	39.8584
GOTERM_BP_FAT	GO:0006742~NADP catabolic process	2	1.08696	0.0303782	NCF2, NCF1	140	3	13588	64.7048	1	0.279726	39.8584
GOTERM_BP_FAT	GO:0042365~water-soluble vitamin catabolic process	2	1.08696	0.0303782	NCF2, NCF1	140	3	13588	64.7048	1	0.279726	39.8584
GOTERM_BP_FAT	GO:0045655~regulation of monocyte differentiation	2	1.08696	0.0303782	CSF1, INPP5D	140	3	13588	64.7048	1	0.279726	39.8584
GOTERM_BP_FAT	GO:0010273~detoxification of copper ion	2	1.08696	0.0303782	MT2, MT1	140	3	13588	64.7048	1	0.279726	39.8584
GOTERM_BP_FAT	GO:0060326~cell chemotaxis	3	1.63043	0.0308597	FCER1G, ITGB2, FCGR3	140	27	13588	10.7841	1	0.281723	40.3488
GOTERM_BP_FAT	GO:0030595~leukocyte chemotaxis	3	1.63043	0.0308597	FCER1G, ITGB2, FCGR3	140	27	13588	10.7841	1	0.281723	40.3488
GOTERM_BP_FAT	GO:0060193~positive regulation of lipase activity	3	1.63043	0.0308597	ANG, EDN1, TGM2	140	27	13588	10.7841	1	0.281723	40.3488
GOTERM_BP_FAT	GO:0050801~ion homeostasis	8	4.34783	0.0309844	PTPRC, SLC11A1, GCLC, EDN1, MT2, TGM2, MT1, LGI4	140	293	13588	2.65002	1	0.280917	40.4752
GOTERM_CC_FAT	GO:0031224~intrinsic to membrane	73	39.6739	0.0315826	GNA13, GPR160, LRRC8A, H2-D1, CD52, TLR7, SLC7A7, CD48, SEZ6L2, TMEM173, KCNK6, 4632428N05RIK, CH25H, SLC2A1, NIPAL3, CSF2RB, EVI2B, AF251705, IFNGR1, EGFR, LAIR1, PLD4, ADIPOR2, CLEC4N, CD163, PNPLA7, GABRR2, CD84, CD86, ADRB2, LAT2, CD33, CLEC5A, C3AR1, CPM, SLC38A2, MFSD8, CSF1, ITGB2, PAQR8, ACP2, SLC11A1, P2RY6, LAPTM5, RAC2, IL10RA, ALOX5AP, FCER1G, PEX12, ENTPD1, CSF1R, SCD1, HAVCR2, LY6C1…	130	5914	12504	1.18726	0.997602	0.422174	32.8447
GOTERM_BP_FAT	GO:0002520~immune system development	8	4.34783	0.0319784	PTPRC, BCL2A1D, IKZF1, LYN, LRRC8A, HCLS1, IRF8, RUNX1	140	295	13588	2.63206	1	0.286812	41.4737
GOTERM_BP_FAT	GO:0010517~regulation of phospholipase activity	3	1.63043	0.0330147	ANG, EDN1, TGM2	140	28	13588	10.399	1	0.292898	42.4978
GOTERM_BP_FAT	GO:0010033~response to organic substance	11	5.97826	0.0345227	CD48, SLC11A1, GCLC, MAT2A, CYP2D22, LYN, HCLS1, ADIPOR2, ACP2, CLEC7A, CD14	140	505	13588	2.11412	1	0.302356	43.9581
GOTERM_BP_FAT	GO:0007596~blood coagulation	4	2.17391	0.0348854	GNA13, PLEK, F13A1, ENTPD1	140	70	13588	5.54612	1	0.303202	44.3041
GOTERM_BP_FAT	GO:0050817~coagulation	4	2.17391	0.0348854	GNA13, PLEK, F13A1, ENTPD1	140	70	13588	5.54612	1	0.303202	44.3041
GOTERM_BP_FAT	GO:0051174~regulation of phosphorus metabolic process	8	4.34783	0.0350887	EGFR, PTPRC, SLC11A1, LYN, HCLS1, CSF1, EDN1, CBS	140	301	13588	2.57959	1	0.302874	44.4973
GOTERM_BP_FAT	GO:0019220~regulation of phosphate metabolic process	8	4.34783	0.0350887	EGFR, PTPRC, SLC11A1, LYN, HCLS1, CSF1, EDN1, CBS	140	301	13588	2.57959	1	0.302874	44.4973
GOTERM_BP_FAT	GO:0050873~brown fat cell differentiation	3	1.63043	0.0352268	SCD1, ADRB2, SELENBP1	140	29	13588	10.0404	1	0.302077	44.628
GOTERM_BP_FAT	GO:0009636~response to toxin	3	1.63043	0.0352268	NUPR1, MT2, MT1	140	29	13588	10.0404	1	0.302077	44.628
SMART	SM00252:SH2	5	2.71739	0.035451	LYN, HCK, INPP5D, TENC1, BTK	103	111	9131	3.99327	0.970907	0.507103	32.9078
INTERPRO	IPR000006:Metallothionein, vertebrate	2	1.08696	0.035549	MT2, MT1	161	4	17763	55.1646	0.999999	0.594443	39.3426
INTERPRO	IPR018064:Metallothionein, vertebrate, metal binding site	2	1.08696	0.035549	MT2, MT1	161	4	17763	55.1646	0.999999	0.594443	39.3426
INTERPRO	IPR003019:Metallothionein superfamily, eukaryotic	2	1.08696	0.035549	MT2, MT1	161	4	17763	55.1646	0.999999	0.594443	39.3426
GOTERM_BP_FAT	GO:0001932~regulation of protein amino acid phosphorylation	5	2.71739	0.035594	EGFR, PTPRC, LYN, HCLS1, CBS	140	121	13588	4.01063	1	0.302942	44.9743
SP_PIR_KEYWORDS	metal-thiolate cluster	2	1.08696	0.0360244	MT2, MT1	164	4	17854	54.4329	0.99985	0.287282	37.7223
GOTERM_BP_FAT	GO:0007599~hemostasis	4	2.17391	0.0361597	GNA13, PLEK, F13A1, ENTPD1	140	71	13588	5.46801	1	0.305211	45.504
GOTERM_BP_FAT	GO:0048871~multicellular organismal homeostasis	4	2.17391	0.0361597	SLC11A1, ADRB2, CSF1, TENC1	140	71	13588	5.46801	1	0.305211	45.504
GOTERM_BP_FAT	GO:0032269~negative regulation of cellular protein metabolic process	4	2.17391	0.0374578	PTPRC, GCLC, ANG, PAIP2B	140	72	13588	5.39206	1	0.312595	46.7011
SP_PIR_KEYWORDS	receptor	32	17.3913	0.0382835	C3AR1, GPR160, ITGB2, PAQR8, TLR7, P2RY6, IL10RA, 4632428N05RIK, FCER1G, CSF2RB, AF251705, NR2F2, IFNGR1, CSF1R, EGFR, HAVCR2, LAIR1, TLR13, TNFRSF13B, ADIPOR2, FZD2, FCGR1, FCGR3, CD84, GABRR2, ADRB2, LYVE1, CD86, EMR1, FCGR2B, CLEC7A, MERTK	164	2465	17854	1.41327	0.999915	0.293182	39.5801
COG_ONTOLOGY	Amino acid transport and metabolism	3	1.63043	0.0383067	AGXT2L1, SLC15A3, SLC7A7	13	54	2040	8.71795	0.208921	0.208921	17.0502
SP_PIR_KEYWORDS	autophosphorylation	3	1.63043	0.038402	LYN, PHKA1, CSF1R	164	34	17854	9.60581	0.999917	0.285124	39.6761
GOTERM_BP_FAT	GO:0009166~nucleotide catabolic process	3	1.63043	0.0398173	NCF2, NCF1, ENTPD1	140	31	13588	9.39263	1	0.3271	48.8143
UP_SEQ_FEATURE	metal ion-binding site:Divalent metal cation; cluster B	2	1.08696	0.0398412	MT2, MT1	163	4	16021	49.1442	1	0.811173	44.6078
UP_SEQ_FEATURE	metal ion-binding site:Divalent metal cation; cluster A	2	1.08696	0.0398412	MT2, MT1	163	4	16021	49.1442	1	0.811173	44.6078
GOTERM_BP_FAT	GO:0046434~organophosphate catabolic process	2	1.08696	0.0402992	NCF2, NCF1	140	4	13588	48.5286	1	0.328532	49.2361
GOTERM_BP_FAT	GO:0001794~type IIa hypersensitivity	2	1.08696	0.0402992	FCGR1, FCGR3	140	4	13588	48.5286	1	0.328532	49.2361
GOTERM_BP_FAT	GO:0002445~type II hypersensitivity	2	1.08696	0.0402992	FCGR1, FCGR3	140	4	13588	48.5286	1	0.328532	49.2361
GOTERM_BP_FAT	GO:0001788~antibody-dependent cellular cytotoxicity	2	1.08696	0.0402992	FCGR1, FCGR3	140	4	13588	48.5286	1	0.328532	49.2361
GOTERM_BP_FAT	GO:0006631~fatty acid metabolic process	6	3.26087	0.0406494	SCD1, CYP2D22, NCF1, CH25H, ALOX5AP, ADIPOR2	140	184	13588	3.16491	1	0.329056	49.5404
GOTERM_BP_FAT	GO:0055080~cation homeostasis	6	3.26087	0.0406494	PTPRC, SLC11A1, EDN1, MT2, TGM2, MT1	140	184	13588	3.16491	1	0.329056	49.5404
GOTERM_MF_FAT	GO:0016298~lipase activity	4	2.17391	0.0420593	PNPLA7, PLD4, ASPG, PLA2G3	123	84	13288	5.14441	0.999999	0.650446	43.971
GOTERM_BP_FAT	GO:0060191~regulation of lipase activity	3	1.63043	0.042193	ANG, EDN1, TGM2	140	32	13588	9.09911	1	0.3375	50.8621
GOTERM_BP_FAT	GO:0032675~regulation of interleukin-6 production	3	1.63043	0.042193	FCER1G, INPP5D, TLR7	140	32	13588	9.09911	1	0.3375	50.8621
GOTERM_BP_FAT	GO:0002683~negative regulation of immune system process	4	2.17391	0.0428857	PTPRC, FCGR2B, TNFRSF13B, INPP5D	140	76	13588	5.10827	1	0.340198	51.4446
INTERPRO	IPR001811:Small chemokine, interleukin-8-like	3	1.63043	0.043719	CCL9, CCL19, CCL6	161	37	17763	8.94561	1	0.648288	46.0669
SP_PIR_KEYWORDS	Proto-oncogene	4	2.17391	0.0441146	LYN, EVI2B, MERTK, CSF1R	164	86	17854	5.06353	0.99998	0.311599	44.1416
SP_PIR_KEYWORDS	metal binding	2	1.08696	0.044827	MT2, MT1	164	5	17854	43.5463	0.999983	0.307123	44.6766
GOTERM_MF_FAT	GO:0016175~superoxide-generating NADPH oxidase activity	2	1.08696	0.0450775	NCF2, NCF1	123	5	13288	43.213	1	0.649256	46.3047
GOTERM_MF_FAT	GO:0050664~oxidoreductase activity, acting on NADH or NADPH, with oxygen as acceptor	2	1.08696	0.0450775	NCF2, NCF1	123	5	13288	43.213	1	0.649256	46.3047
PIR_SUPERFAMILY	PIRSF001980:Fc gamma receptor III	2	1.08696	0.0454278	FCGR2B, FCGR3	95	4	8136	42.8211	0.994771	0.92769	41.0148
PIR_SUPERFAMILY	PIRSF038831:Bcl-2-related protein A1	2	1.08696	0.0454278	BCL2A1B, BCL2A1A	95	4	8136	42.8211	0.994771	0.92769	41.0148
PIR_SUPERFAMILY	PIRSF002564:metallothionein	2	1.08696	0.0454278	MT2, MT1	95	4	8136	42.8211	0.994771	0.92769	41.0148
GOTERM_BP_FAT	GO:0051248~negative regulation of protein metabolic process	4	2.17391	0.0457394	PTPRC, GCLC, ANG, PAIP2B	140	78	13588	4.97729	1	0.356712	53.7765
GOTERM_BP_FAT	GO:0042113~B cell activation	4	2.17391	0.0457394	PTPRC, LAT2, IKZF1, LRRC8A	140	78	13588	4.97729	1	0.356712	53.7765
INTERPRO	IPR013106:Immunoglobulin V-set	8	4.34783	0.0469568	HAVCR2, CD48, SLAMF9, 4632428N05RIK, CD33, AF251705, FCGR1, CSF1R	161	364	17763	2.42482	1	0.652882	48.535
SP_PIR_KEYWORDS	phosphoric monoester hydrolase	3	1.63043	0.0470032	PTPRC, ACP2, INPP5D	164	38	17854	8.59467	0.99999	0.311146	46.2816
GOTERM_BP_FAT	GO:0006767~water-soluble vitamin metabolic process	3	1.63043	0.0470986	GCLC, NCF2, NCF1	140	34	13588	8.56387	1	0.363367	54.8498
GOTERM_BP_FAT	GO:0045621~positive regulation of lymphocyte differentiation	3	1.63043	0.0470986	PTPRC, IKZF1, INPP5D	140	34	13588	8.56387	1	0.363367	54.8498
GOTERM_BP_FAT	GO:0006690~icosanoid metabolic process	3	1.63043	0.0470986	CYP2D22, NCF1, ALOX5AP	140	34	13588	8.56387	1	0.363367	54.8498
GOTERM_MF_FAT	GO:0019955~cytokine binding	4	2.17391	0.0471946	IL10RA, CSF2RB, IFNGR1, CSF1R	123	88	13288	4.91057	1	0.641169	47.8876
GOTERM_MF_FAT	GO:0008009~chemokine activity	3	1.63043	0.0474209	CCL9, CCL19, CCL6	123	38	13288	8.52888	1	0.619234	48.0542
UP_SEQ_FEATURE	repeat:LRR 17	3	1.63043	0.0486398	LRRC8A, TLR13, TLR7	163	35	16021	8.42472	1	0.850182	51.5429
GOTERM_BP_FAT	GO:0032944~regulation of mononuclear cell proliferation	4	2.17391	0.0486852	PTPRC, FCGR2B, TNFRSF13B, INPP5D	140	80	13588	4.85286	1	0.371278	56.073
GOTERM_BP_FAT	GO:0050670~regulation of lymphocyte proliferation	4	2.17391	0.0486852	PTPRC, FCGR2B, TNFRSF13B, INPP5D	140	80	13588	4.85286	1	0.371278	56.073
GOTERM_BP_FAT	GO:0032945~negative regulation of mononuclear cell proliferation	3	1.63043	0.049626	FCGR2B, TNFRSF13B, INPP5D	140	35	13588	8.31918	1	0.375093	56.7836
GOTERM_BP_FAT	GO:0070664~negative regulation of leukocyte proliferation	3	1.63043	0.049626	FCGR2B, TNFRSF13B, INPP5D	140	35	13588	8.31918	1	0.375093	56.7836
GOTERM_BP_FAT	GO:0050672~negative regulation of lymphocyte proliferation	3	1.63043	0.049626	FCGR2B, TNFRSF13B, INPP5D	140	35	13588	8.31918	1	0.375093	56.7836
GOTERM_MF_FAT	GO:0042379~chemokine receptor binding	3	1.63043	0.049691	CCL9, CCL19, CCL6	123	39	13288	8.31019	1	0.614573	49.6986
GOTERM_BP_FAT	GO:0051482~elevation of cytosolic calcium ion concentration during G-protein signaling, coupled to IP3 second messenger (phospholipase C activating)	2	1.08696	0.0501195	EDN1, TGM2	140	5	13588	38.8229	1	0.37615	57.152
GOTERM_BP_FAT	GO:0009111~vitamin catabolic process	2	1.08696	0.0501195	NCF2, NCF1	140	5	13588	38.8229	1	0.37615	57.152
GOTERM_BP_FAT	GO:0002438~acute inflammatory response to antigenic stimulus	2	1.08696	0.0501195	FCGR1, FCGR3	140	5	13588	38.8229	1	0.37615	57.152
GOTERM_BP_FAT	GO:0002524~hypersensitivity	2	1.08696	0.0501195	FCGR1, FCGR3	140	5	13588	38.8229	1	0.37615	57.152
GOTERM_BP_FAT	GO:0051345~positive regulation of hydrolase activity	4	2.17391	0.0501922	ANG, EDN1, CYCS, TGM2	140	81	13588	4.79295	1	0.374673	57.206
SP_PIR_KEYWORDS	heterodimer	3	1.63043	0.0515429	H2-D1, ITGB2, RUNX1	164	40	17854	8.16494	0.999997	0.327592	49.4925
GOTERM_BP_FAT	GO:0070663~regulation of leukocyte proliferation	4	2.17391	0.0517219	PTPRC, FCGR2B, TNFRSF13B, INPP5D	140	82	13588	4.73449	1	0.381866	58.3279
KEGG_PATHWAY	mmu04142:Lysosome	5	2.71739	0.0519088	SLC11A1, MFSD8, LAPTM5, ACP2, CTSS	69	119	5738	3.49409	0.993679	0.397335	44.341
GOTERM_MF_FAT	GO:0004715~non-membrane spanning protein tyrosine kinase activity	3	1.63043	0.0519998	LYN, HCK, BTK	123	40	13288	8.10244	1	0.610702	51.3214
GOTERM_BP_FAT	GO:0007204~elevation of cytosolic calcium ion concentration	3	1.63043	0.0522014	PTPRC, EDN1, TGM2	140	36	13588	8.0881	1	0.382773	58.6739
GOTERM_BP_FAT	GO:0033559~unsaturated fatty acid metabolic process	3	1.63043	0.0522014	CYP2D22, NCF1, ALOX5AP	140	36	13588	8.0881	1	0.382773	58.6739
GOTERM_BP_FAT	GO:0034655~nucleobase, nucleoside, nucleotide and nucleic acid catabolic process	3	1.63043	0.0522014	NCF2, NCF1, ENTPD1	140	36	13588	8.0881	1	0.382773	58.6739
GOTERM_BP_FAT	GO:0034656~nucleobase, nucleoside and nucleotide catabolic process	3	1.63043	0.0522014	NCF2, NCF1, ENTPD1	140	36	13588	8.0881	1	0.382773	58.6739
GOTERM_BP_FAT	GO:0006575~cellular amino acid derivative metabolic process	5	2.71739	0.0567009	PNPLA7, SAT1, GCLC, MAT2A, CYP2D22	140	141	13588	3.44174	1	0.406668	61.7914
GOTERM_BP_FAT	GO:0016053~organic acid biosynthetic process	5	2.71739	0.0567009	SCD1, MAT2A, CH25H, ALOX5AP, CBS	140	141	13588	3.44174	1	0.406668	61.7914
GOTERM_BP_FAT	GO:0046394~carboxylic acid biosynthetic process	5	2.71739	0.0567009	SCD1, MAT2A, CH25H, ALOX5AP, CBS	140	141	13588	3.44174	1	0.406668	61.7914
GOTERM_BP_FAT	GO:0051480~cytosolic calcium ion homeostasis	3	1.63043	0.0574914	PTPRC, EDN1, TGM2	140	38	13588	7.66241	1	0.409122	62.3157
GOTERM_CC_FAT	GO:0016323~basolateral plasma membrane	5	2.71739	0.0580709	EGFR, PTPRC, SLC2A1, SLCO2B1, TENC1	130	141	12504	3.4108	0.999987	0.608301	52.3956
UP_SEQ_FEATURE	repeat:LRR 11	4	2.17391	0.0597742	LRRC8A, TLR13, TLR7, CD14	163	88	16021	4.46765	1	0.888095	59.1616
GOTERM_BP_FAT	GO:0001878~response to yeast	2	1.08696	0.05984	NCF1, CLEC7A	140	6	13588	32.3524	1	0.420082	63.834
GOTERM_BP_FAT	GO:0045730~respiratory burst	2	1.08696	0.05984	SLC11A1, NCF1	140	6	13588	32.3524	1	0.420082	63.834
GOTERM_BP_FAT	GO:0010604~positive regulation of macromolecule metabolic process	12	6.52174	0.0599002	PTPRC, SLC11A1, ADRB2, GCLC, IKZF1, LYN, CEBPD, HCLS1, IRF8, RUNX1, TLR7, FCGR3	140	633	13588	1.83995	1	0.41843	63.8721
INTERPRO	IPR017441:Protein kinase, ATP binding site	9	4.8913	0.0609709	HAVCR2, LOC100040601, EGFR, E130304F04RIK, LYN, PHKG1, HCK, MERTK, CSF1R, BTK	161	467	17763	2.12626	1	0.729398	58.0575
GOTERM_MF_FAT	GO:0046030~inositol trisphosphate phosphatase activity	2	1.08696	0.0625389	INPP5D, INPP5A	123	7	13288	30.8664	1	0.660698	58.132
GOTERM_MF_FAT	GO:0004445~inositol-polyphosphate 5-phosphatase activity	2	1.08696	0.0625389	INPP5D, INPP5A	123	7	13288	30.8664	1	0.660698	58.132
SMART	SM00199:SCY	3	1.63043	0.0639179	CCL9, CCL19, CCL6	103	37	9131	7.18788	0.998456	0.660014	51.8257
UP_SEQ_FEATURE	repeat:LRR 16	3	1.63043	0.0644738	LRRC8A, TLR13, TLR7	163	41	16021	7.19183	1	0.891407	62.0293
GOTERM_BP_FAT	GO:0044272~sulfur compound biosynthetic process	3	1.63043	0.0657565	GCLC, MAT2A, CBS	140	41	13588	7.10174	1	0.447417	67.408
KEGG_PATHWAY	mmu05340:Primary immunodeficiency	3	1.63043	0.067358	PTPRC, TNFRSF13B, BTK	69	36	5738	6.92995	0.998673	0.45242	53.5372
GOTERM_BP_FAT	GO:0015837~amine transport	4	2.17391	0.0682277	SLC11A1, SLC38A2, SLC7A7, FCGR3	140	92	13588	4.21988	1	0.457977	68.8003
GOTERM_BP_FAT	GO:0044270~nitrogen compound catabolic process	3	1.63043	0.0685949	NCF2, NCF1, ENTPD1	140	42	13588	6.93265	1	0.45778	69.0023
GOTERM_BP_FAT	GO:0042554~superoxide anion generation	2	1.08696	0.0694617	NCF2, NCF1	140	7	13588	27.7306	1	0.460073	69.4744
GOTERM_BP_FAT	GO:0046688~response to copper ion	2	1.08696	0.0694617	MT2, MT1	140	7	13588	27.7306	1	0.460073	69.4744
GOTERM_BP_FAT	GO:0002446~neutrophil mediated immunity	2	1.08696	0.0694617	NCF1, MYO1F	140	7	13588	27.7306	1	0.460073	69.4744
GOTERM_BP_FAT	GO:0045986~negative regulation of smooth muscle contraction	2	1.08696	0.0694617	ADRB2, NCF1	140	7	13588	27.7306	1	0.460073	69.4744
GOTERM_BP_FAT	GO:0002437~inflammatory response to antigenic stimulus	2	1.08696	0.0694617	FCGR1, FCGR3	140	7	13588	27.7306	1	0.460073	69.4744
GOTERM_BP_FAT	GO:0001812~positive regulation of type I hypersensitivity	2	1.08696	0.0694617	FCER1G, FCGR3	140	7	13588	27.7306	1	0.460073	69.4744
GOTERM_BP_FAT	GO:0006534~cysteine metabolic process	2	1.08696	0.0694617	GCLC, CBS	140	7	13588	27.7306	1	0.460073	69.4744
GOTERM_BP_FAT	GO:0006882~cellular zinc ion homeostasis	2	1.08696	0.0694617	MT2, MT1	140	7	13588	27.7306	1	0.460073	69.4744
INTERPRO	IPR001102:Transglutaminase, N-terminal	2	1.08696	0.0698419	F13A1, TGM2	161	8	17763	27.5823	1	0.759528	63.2109
INTERPRO	IPR013808:Transglutaminase, conserved site	2	1.08696	0.0698419	F13A1, TGM2	161	8	17763	27.5823	1	0.759528	63.2109
INTERPRO	IPR008958:Transglutaminase, C-terminal	2	1.08696	0.0698419	F13A1, TGM2	161	8	17763	27.5823	1	0.759528	63.2109
GOTERM_MF_FAT	GO:0004622~lysophospholipase activity	2	1.08696	0.0711505	PNPLA7, ASPG	123	8	13288	27.0081	1	0.690735	63.0301
GOTERM_BP_FAT	GO:0050900~leukocyte migration	3	1.63043	0.0714732	FCER1G, ITGB2, FCGR3	140	43	13588	6.77143	1	0.467941	70.5439
GOTERM_BP_FAT	GO:0030155~regulation of cell adhesion	4	2.17391	0.0717843	CYTIP, CSF1, TGM2, MYO1F	140	94	13588	4.13009	1	0.467426	70.7062
UP_SEQ_FEATURE	propeptide:Removed in mature form	6	3.26087	0.0728628	LY6C1, CD48, CPM, RAC2, CD52, CD14, LY6C2	163	220	16021	2.68059	1	0.906703	66.6873
SP_PIR_KEYWORDS	iron	7	3.80435	0.0743661	SCD1, SLC11A1, CYP2D22, PLOD3, CH25H, CYCS, CBS	164	321	17854	2.37402	1	0.429938	63.118
UP_SEQ_FEATURE	sequence variant	8	4.34783	0.0750497	CD84, SLC11A1, FCGR2B, CSF1, H2-D1, CTSS, SLC7A7, BTK	163	362	16021	2.17212	1	0.900751	67.811
SP_PIR_KEYWORDS	muscle protein	3	1.63043	0.0763557	PHKG1, PHKA1, CASQ1	164	50	17854	6.53195	1	0.429174	64.1282
SP_PIR_KEYWORDS	myristate	4	2.17391	0.0779937	RNF125, LYN, HCK, ARL4D	164	109	17854	3.99508	1	0.426973	64.9407
GOTERM_BP_FAT	GO:0030041~actin filament polymerization	2	1.08696	0.0789857	ANG, WAS	140	8	13588	24.2643	1	0.499296	74.2354
GOTERM_BP_FAT	GO:0055069~zinc ion homeostasis	2	1.08696	0.0789857	MT2, MT1	140	8	13588	24.2643	1	0.499296	74.2354
SP_PIR_KEYWORDS	cytokine	5	2.71739	0.0791786	CSF1, CCL9, CCL19, INPP5D, CCL6	164	177	17854	3.07531	1	0.423009	65.5179
GOTERM_MF_FAT	GO:0003810~protein-glutamine gamma-glutamyltransferase activity	2	1.08696	0.0796836	F13A1, TGM2	123	9	13288	24.0072	1	0.715616	67.3554
GOTERM_BP_FAT	GO:0008285~negative regulation of cell proliferation	6	3.26087	0.0800758	NUPR1, FCGR2B, ANG, TNFRSF13B, INPP5D, GJB6	140	224	13588	2.59974	1	0.502182	74.7334
GOTERM_BP_FAT	GO:0030183~B cell differentiation	3	1.63043	0.080336	PTPRC, IKZF1, LRRC8A	140	46	13588	6.32981	1	0.501296	74.851
GOTERM_BP_FAT	GO:0048878~chemical homeostasis	8	4.34783	0.0809923	PTPRC, SLC11A1, GCLC, EDN1, MT2, TGM2, MT1, LGI4	140	365	13588	2.12728	1	0.502195	75.1452
GOTERM_BP_FAT	GO:0046942~carboxylic acid transport	4	2.17391	0.0810306	SLC11A1, SLC38A2, ABCC3, SLC7A7	140	99	13588	3.9215	1	0.500331	75.1622
GOTERM_BP_FAT	GO:0002696~positive regulation of leukocyte activation	4	2.17391	0.0810306	PTPRC, IKZF1, FCER1G, INPP5D	140	99	13588	3.9215	1	0.500331	75.1622
KEGG_PATHWAY	mmu05210:Colorectal cancer	4	2.17391	0.0813542	EGFR, RAC2, CYCS, FZD2	69	86	5738	3.86788	0.999684	0.489194	60.6521
GOTERM_MF_FAT	GO:0004521~endoribonuclease activity	3	1.63043	0.082408	RNASEN, ANG, RNASE4	123	52	13288	6.23265	1	0.711519	68.6344
GOTERM_BP_FAT	GO:0051241~negative regulation of multicellular organismal process	4	2.17391	0.0829392	SLC11A1, ADRB2, NCF1, INPP5D	140	100	13588	3.88229	1	0.506754	75.9989
GOTERM_BP_FAT	GO:0015849~organic acid transport	4	2.17391	0.0829392	SLC11A1, SLC38A2, ABCC3, SLC7A7	140	100	13588	3.88229	1	0.506754	75.9989
GOTERM_BP_FAT	GO:0006875~cellular metal ion homeostasis	4	2.17391	0.0829392	PTPRC, EDN1, TGM2, MT1	140	100	13588	3.88229	1	0.506754	75.9989
GOTERM_BP_FAT	GO:0006800~oxygen and reactive oxygen species metabolic process	3	1.63043	0.0833628	NCF2, NCF1, CYCS	140	47	13588	6.19514	1	0.506588	76.181
GOTERM_BP_FAT	GO:0008037~cell recognition	3	1.63043	0.0833628	CLEC7A, FCGR1, FCGR3	140	47	13588	6.19514	1	0.506588	76.181
UP_SEQ_FEATURE	repeat:LRR 15	3	1.63043	0.0847749	LRRC8A, TLR13, TLR7	163	48	16021	6.14302	1	0.916679	72.3936
GOTERM_BP_FAT	GO:0035150~regulation of tube size	3	1.63043	0.086424	ADRB2, GCLC, EDN1	140	48	13588	6.06607	1	0.517775	77.4588
GOTERM_BP_FAT	GO:0045580~regulation of T cell differentiation	3	1.63043	0.086424	PTPRC, IKZF1, H2-OA	140	48	13588	6.06607	1	0.517775	77.4588
GOTERM_BP_FAT	GO:0050880~regulation of blood vessel size	3	1.63043	0.086424	ADRB2, GCLC, EDN1	140	48	13588	6.06607	1	0.517775	77.4588
INTERPRO	IPR002931:Transglutaminase-like	2	1.08696	0.0865312	F13A1, TGM2	161	10	17763	22.0658	1	0.815934	71.3504
INTERPRO	IPR000300:Inositol polyphosphate related phosphatase	2	1.08696	0.0865312	INPP5D, INPP5A	161	10	17763	22.0658	1	0.815934	71.3504
UP_SEQ_FEATURE	repeat:LRR 10	4	2.17391	0.0865591	LRRC8A, TLR13, TLR7, CD14	163	103	16021	3.81702	1	0.910436	73.1654
GOTERM_MF_FAT	GO:0005539~glycosaminoglycan binding	4	2.17391	0.0874344	PTPRC, LYVE1, ANG, CRISPLD2	123	114	13288	3.79061	1	0.717767	70.8732
GOTERM_MF_FAT	GO:0070279~vitamin B6 binding	3	1.63043	0.0879048	AGXT2L1, CCBL2, CBS	123	54	13288	6.00181	1	0.704517	71.075
GOTERM_MF_FAT	GO:0030170~pyridoxal phosphate binding	3	1.63043	0.0879048	AGXT2L1, CCBL2, CBS	123	54	13288	6.00181	1	0.704517	71.075
GOTERM_BP_FAT	GO:0042531~positive regulation of tyrosine phosphorylation of STAT protein	2	1.08696	0.0884128	LYN, HCLS1	140	9	13588	21.5683	1	0.524154	78.2541
GOTERM_BP_FAT	GO:0045932~negative regulation of muscle contraction	2	1.08696	0.0884128	ADRB2, NCF1	140	9	13588	21.5683	1	0.524154	78.2541
UP_SEQ_FEATURE	domain:Ig-like V-type	4	2.17391	0.0884996	HAVCR2, CD86, CD33, AF251705	163	104	16021	3.78032	1	0.90481	73.9819
GOTERM_BP_FAT	GO:0009725~response to hormone stimulus	5	2.71739	0.0891872	GCLC, MAT2A, LYN, HCLS1, ADIPOR2	140	165	13588	2.94113	1	0.52537	78.5566
GOTERM_BP_FAT	GO:0006917~induction of apoptosis	5	2.71739	0.0922278	PLEKHF1, NUPR1, TGM2, FCGR1, FCGR3	140	167	13588	2.9059	1	0.535844	79.7065
GOTERM_BP_FAT	GO:0012502~induction of programmed cell death	5	2.71739	0.0922278	PLEKHF1, NUPR1, TGM2, FCGR1, FCGR3	140	167	13588	2.9059	1	0.535844	79.7065
UP_SEQ_FEATURE	lipid moiety-binding region:N-myristoyl glycine	4	2.17391	0.0924354	RNF125, LYN, HCK, ARL4D	163	106	16021	3.70899	1	0.904613	75.5674
GOTERM_BP_FAT	GO:0003018~vascular process in circulatory system	3	1.63043	0.092646	ADRB2, GCLC, EDN1	140	50	13588	5.82343	1	0.53553	79.8601
GOTERM_MF_FAT	GO:0004714~transmembrane receptor protein tyrosine kinase activity	3	1.63043	0.0935081	EGFR, MERTK, CSF1R	123	56	13288	5.78746	1	0.713141	73.3809
GOTERM_MF_FAT	GO:0032555~purine ribonucleotide binding	23	12.5	0.0945951	EGFR, GNA13, GCLC, LYN, MAT2A, PHKG1, HCK, F13A1, MYO1F, DOCK8, BTK, LOC100040601, QRSL1, E130304F04RIK, RAC2, HK3, ABCC3, TGM2, RUNX1, RAB10, ARL4D, MERTK, ENTPD1, CSF1R	123	1796	13288	1.38349	1	0.703411	73.808
GOTERM_MF_FAT	GO:0032553~ribonucleotide binding	23	12.5	0.0945951	EGFR, GNA13, GCLC, LYN, MAT2A, PHKG1, HCK, F13A1, MYO1F, DOCK8, BTK, LOC100040601, QRSL1, E130304F04RIK, RAC2, HK3, ABCC3, TGM2, RUNX1, RAB10, ARL4D, MERTK, ENTPD1, CSF1R	123	1796	13288	1.38349	1	0.703411	73.808
INTERPRO	IPR004254:Hly-III related	2	1.08696	0.0947639	ADIPOR2, PAQR8	161	11	17763	20.0599	1	0.830195	74.7179
GOTERM_BP_FAT	GO:0055065~metal ion homeostasis	4	2.17391	0.0947891	PTPRC, EDN1, TGM2, MT1	140	106	13588	3.66253	1	0.542107	80.6299
GOTERM_BP_FAT	GO:0007243~protein kinase cascade	6	3.26087	0.0948522	GNA13, PTPRC, SLC11A1, PLEK, EDN1, BTK	140	236	13588	2.46755	1	0.540366	80.6522
GOTERM_MF_FAT	GO:0005506~iron ion binding	7	3.80435	0.0960553	SCD1, SLC11A1, CYP2D22, PLOD3, CH25H, CYCS, CBS	123	343	13288	2.20475	1	0.695597	74.3718
UP_SEQ_FEATURE	short sequence motif:Histidine box-1	2	1.08696	0.096664	SCD1, CH25H	163	10	16021	19.6577	1	0.90519	77.1703
UP_SEQ_FEATURE	short sequence motif:Histidine box-3	2	1.08696	0.096664	SCD1, CH25H	163	10	16021	19.6577	1	0.90519	77.1703
UP_SEQ_FEATURE	short sequence motif:Histidine box-2	2	1.08696	0.096664	SCD1, CH25H	163	10	16021	19.6577	1	0.90519	77.1703
SP_PIR_KEYWORDS	duplication	4	2.17391	0.0972356	FCGR2B, H2-D1, CSF2RB, ITGB2	164	120	17854	3.62886	1	0.484968	73.296
GOTERM_BP_FAT	GO:0043299~leukocyte degranulation	2	1.08696	0.0977442	LAT2, MYO1F	140	10	13588	19.4114	1	0.549706	81.6462
GOTERM_BP_FAT	GO:0009968~negative regulation of signal transduction	5	2.71739	0.0984559	PTPRC, ADRB2, HTRA1, RGS5, INPP5D	140	171	13588	2.83793	1	0.550472	81.8834
GOTERM_BP_FAT	GO:0051250~negative regulation of lymphocyte activation	3	1.63043	0.0989942	FCGR2B, TNFRSF13B, INPP5D	140	52	13588	5.59945	1	0.550568	82.0609

## Sheet: Midnightblue
Category	Term	Count	%	PValue	Genes	List Total	Pop Hits	Pop Total	Fold Enrichment	Bonferroni	Benjamini	FDR
GOTERM_BP_FAT	GO:0006350~transcription	9	20.9302	0.0343047	SLTM, NRF1, NOTCH1, ZBTB46, GMEB2, HOMEZ, IKBKG, DNMT1, SCX	31	1772	13588	2.22624	0.999994	0.999994	37.8724
GOTERM_BP_FAT	GO:0022618~ribonucleoprotein complex assembly	2	4.65116	0.0724798	EIF3D, GEMIN6	31	34	13588	25.7837	1	0.999998	64.1548
GOTERM_BP_FAT	GO:0034622~cellular macromolecular complex assembly	3	6.97674	0.0824962	EIF3D, GEMIN6, TUBB4	31	217	13588	6.05976	1	0.999947	69.0877
GOTERM_CC_FAT	GO:0009898~internal side of plasma membrane	3	6.97674	0.0828361	LSP1, ARL1, RHEB	22	287	12504	5.94108	0.997436	0.997436	59.0266
GOTERM_MF_FAT	GO:0005525~GTP binding	4	9.30233	0.0309779	ARL1, DNM3, RHEB, TUBB4	27	354	13288	5.561	0.941111	0.941111	28.9887
GOTERM_MF_FAT	GO:0032561~guanyl ribonucleotide binding	4	9.30233	0.0330246	ARL1, DNM3, RHEB, TUBB4	27	363	13288	5.42312	0.951316	0.779355	30.6034
GOTERM_MF_FAT	GO:0019001~guanyl nucleotide binding	4	9.30233	0.0330246	ARL1, DNM3, RHEB, TUBB4	27	363	13288	5.42312	0.951316	0.779355	30.6034
GOTERM_MF_FAT	GO:0000287~magnesium ion binding	4	9.30233	0.0445745	ARL1, ATP2A2, RHEB, MAP2K7	27	409	13288	4.81318	0.983491	0.745373	39.1072
GOTERM_MF_FAT	GO:0015082~di-, tri-valent inorganic cation transmembrane transporter activity	2	4.65116	0.0608194	ATP2A2, SLC30A1	27	32	13288	30.7593	0.996473	0.7563	49.4706
SP_PIR_KEYWORDS	phosphoprotein	21	48.8372	0.0103157	DNM3, GMEB2, RMI1, DENND1C, VPS8, SLTM, TST, LSP1, EIF3D, NOTCH1, NRF1, WDR26, ATP2A2, SLC30A1, HOMEZ, IKBKG, DNMT1, PTDSS1, GEMIN6, MAP2K7, TUBB4	37	6311	17854	1.60566	0.606719	0.606719	10.6674
SP_PIR_KEYWORDS	transcription regulation	9	20.9302	0.0104597	SLTM, NRF1, NOTCH1, ZBTB46, GMEB2, HOMEZ, IKBKG, DNMT1, SCX	37	1546	17854	2.8091	0.611837	0.376973	10.8088
SP_PIR_KEYWORDS	isopeptide bond	4	9.30233	0.0180866	ZBTB46, ATP2A2, TPP2, IKBKG	37	277	17854	6.96809	0.806542	0.421644	18.009
SP_PIR_KEYWORDS	ubl conjugation	5	11.6279	0.0205649	ZBTB46, ATP2A2, TPP2, IKBKG, DNMT1	37	524	17854	4.60439	0.845898	0.373455	20.2324
SP_PIR_KEYWORDS	Transcription	9	20.9302	0.0222455	SLTM, NRF1, NOTCH1, ZBTB46, GMEB2, HOMEZ, IKBKG, DNMT1, SCX	37	1769	17854	2.45498	0.867967	0.332983	21.7089
SP_PIR_KEYWORDS	gtp-binding	4	9.30233	0.0248741	ARL1, DNM3, RHEB, TUBB4	37	313	17854	6.16665	0.896376	0.314653	23.9684
SP_PIR_KEYWORDS	cytoplasm	12	27.907	0.031922	DNM3, EIF3D, WDR26, GMEB2, TPP2, PCMTD2, IKBKG, DNMT1, GEMIN6, MAP2K7, DCTN4, PHLDA3	37	3029	17854	1.91168	0.946058	0.341058	29.7377
SP_PIR_KEYWORDS	acetylation	10	23.2558	0.0375408	LSP1, TST, SLTM, DNM3, ATP2A2, TPP2, TRAPPC6B, DNMT1, MAP2K7, DCTN4	37	2325	17854	2.07544	0.968055	0.349794	34.0491
SP_PIR_KEYWORDS	magnesium	4	9.30233	0.0470774	ARL1, ATP2A2, RHEB, MAP2K7	37	403	17854	4.78948	0.986963	0.382586	40.8202
SP_PIR_KEYWORDS	nucleus	13	30.2326	0.0649032	CAPN7, ZBTB46, GMEB2, RMI1, SLTM, NRF1, NOTCH1, IKBKG, HOMEZ, DNMT1, GEMIN6, SCX, MAP2K7	37	3808	17854	1.64733	0.997617	0.45335	51.8101
SP_PIR_KEYWORDS	activator	4	9.30233	0.0731845	NRF1, NOTCH1, DNMT1, SCX	37	484	17854	3.98794	0.99893	0.463036	56.255
SP_PIR_KEYWORDS	metal-binding	10	23.2558	0.0804868	ARL1, NOTCH1, ZBTB46, ATP2A2, GMEB2, IKBKG, DNMT1, RHEB, MAP2K7, VPS8	37	2682	17854	1.79918	0.999475	0.467052	59.8619
SP_PIR_KEYWORDS	alternative splicing	14	32.5581	0.0943555	DNM3, ZBTB46, DCTN4, DENND1C, VPS8, SLTM, LSP1, NRF1, NOTCH1, ATP2A2, TPP2, HOMEZ, DNMT1, MAP2K7	37	4481	17854	1.5076	0.999866	0.496482	65.9784
UP_SEQ_FEATURE	cross-link:Glycyl lysine isopeptide (Lys-Gly) (interchain with G-Cter in ubiquitin)	4	9.30233	0.00627406	ZBTB46, ATP2A2, TPP2, IKBKG	37	168	16021	10.3095	0.724794	0.724794	7.61499
UP_SEQ_FEATURE	metal ion-binding site:Magnesium	3	6.97674	0.0223732	ARL1, ATP2A2, RHEB	37	103	16021	12.6117	0.990329	0.901658	24.7803
UP_SEQ_FEATURE	nucleotide phosphate-binding region:GTP	4	9.30233	0.023315	ARL1, DNM3, RHEB, TUBB4	37	274	16021	6.32117	0.992063	0.800523	25.687
UP_SEQ_FEATURE	mutagenesis site	5	11.6279	0.0775017	LSP1, NOTCH1, IKBKG, DNMT1, PHLDA3	37	723	16021	2.99447	1	0.983987	63.767

## Sheet: Magenta
Category	Term	Count	%	PValue	Genes	List Total	Pop Hits	Pop Total	Fold Enrichment	Bonferroni	Benjamini	FDR
GOTERM_BP_FAT	GO:0006955~immune response	36	29.0323	4.19921e-28	CXCL5, H2-D1, RSAD2, LOC68395, TLR4, CD74, CCL7, CXCL10, B2M, OASL2, TAP1, GBP10, H2-T10, FAS, MPA2L, H2-K1, GBP8, LOC100044874, IRGM1, GBP6, H2-L, H2-M3, C4B, H2-GS10, SAMHD1, H2-AB1, H2-Q6, FCGR1, H2-Q7, PSMB8, H2-Q8, PSMB9, CCL12, C920025E04RIK, H2-T9, H2-EB1, IRF8, OAS1B, H2-T22, H2-AA, H2-T23, H2-DMA, GBP3, GBP2	91	471	13588	11.4129	3.24599e-25	3.24599e-25	6.41672e-25
GOTERM_BP_FAT	GO:0019882~antigen processing and presentation	18	14.5161	6.19839e-21	H2-D1, LOC68395, CD74, B2M, H2-T10, H2-K1, LOC100044874, H2-L, H2-M3, H2-GS10, H2-AB1, H2-Q6, H2-Q7, FCGR1, H2-Q8, PSMB8, PSMB9, C920025E04RIK, H2-T9, H2-EB1, H2-T22, H2-AA, H2-T23, H2-DMA, TAPBPL	91	87	13588	30.8935	4.79136e-18	2.39568e-18	9.47164e-18
GOTERM_BP_FAT	GO:0048002~antigen processing and presentation of peptide antigen	13	10.4839	2.43202e-18	H2-K1, LOC100044874, H2-L, H2-M3, H2-D1, H2-AB1, LOC68395, H2-Q6, H2-Q7, FCGR1, H2-Q8, CD74, B2M, H2-EB1, H2-AA, H2-T23, H2-DMA, TAPBPL	91	35	13588	55.4612	1.87995e-15	6.26652e-16	3.71632e-15
GOTERM_CC_FAT	GO:0042611~MHC protein complex	13	10.4839	1.45137e-16	H2-K1, LOC100044874, H2-L, H2-M3, H2-GS10, H2-D1, H2-AB1, LOC68395, H2-Q6, H2-Q7, H2-Q8, B2M, C920025E04RIK, H2-T9, H2-EB1, H2-T22, H2-AA, H2-T23, H2-T10, H2-DMA	76	52	12504	41.1316	1.69864e-14	1.69864e-14	1.33227e-13
SP_PIR_KEYWORDS	immune response	18	14.5161	6.61752e-16	H2-K1, LOC100044874, IRGM1, H2-L, C4B, H2-D1, SAMHD1, H2-AB1, TLR4, LOC68395, H2-Q6, H2-Q7, FCGR1, PSMB8, H2-Q8, CD74, B2M, PSMB9, TAP1, H2-EB1, H2-AA, H2-T23, H2-DMA	107	184	17854	16.3232	1.05915e-13	1.05915e-13	7.99361e-13
UP_SEQ_FEATURE	domain:Ig-like C1-type	10	8.06452	2.69127e-14	H2-K1, LOC100044874, H2-L, H2-D1, H2-AB1, LOC68395, H2-Q6, H2-Q7, H2-Q8, B2M, H2-EB1, H2-AA, H2-T23, TAPBPL, H2-DMA	105	25	16021	61.0324	1.11231e-11	1.11231e-11	3.76588e-11
INTERPRO	IPR003597:Immunoglobulin C1-set	13	10.4839	1.98683e-13	H2-K1, LOC100044874, H2-L, H2-M3, H2-GS10, H2-D1, H2-AB1, LOC68395, H2-Q6, H2-Q7, H2-Q8, B2M, H2-T9, H2-EB1, H2-T22, H2-AA, H2-T23, H2-T10, H2-DMA, TAPBPL	116	83	17763	23.9841	4.59066e-11	4.59066e-11	2.54952e-10
SMART	SM00407:IGc1	13	10.4839	3.13812e-13	H2-K1, LOC100044874, H2-L, H2-M3, H2-GS10, H2-D1, H2-AB1, LOC68395, H2-Q6, H2-Q7, H2-Q8, B2M, H2-T9, H2-EB1, H2-T22, H2-AA, H2-T23, H2-T10, H2-DMA, TAPBPL	65	83	9131	22.0024	1.69484e-11	1.69484e-11	3.07476e-10
KEGG_PATHWAY	mmu05332:Graft-versus-host disease	12	9.67742	7.05929e-13	H2-K1, LOC100044874, H2-L, H2-M3, H2-D1, H2-AB1, GZMB, LOC68395, H2-Q6, H2-Q7, H2-Q8, H2-T9, H2-EB1, H2-AA, H2-T22, H2-T23, H2-T10, FAS, H2-DMA	49	58	5738	24.228	3.88234e-11	3.88234e-11	6.94289e-10
KEGG_PATHWAY	mmu05330:Allograft rejection	12	9.67742	7.05929e-13	H2-K1, LOC100044874, H2-L, H2-M3, H2-D1, H2-AB1, GZMB, LOC68395, H2-Q6, H2-Q7, H2-Q8, H2-T9, H2-EB1, H2-AA, H2-T22, H2-T23, H2-T10, FAS, H2-DMA	49	58	5738	24.228	3.88234e-11	3.88234e-11	6.94289e-10
GOTERM_BP_FAT	GO:0002478~antigen processing and presentation of exogenous peptide antigen	9	7.25806	1.21891e-12	H2-K1, LOC100044874, H2-M3, H2-EB1, H2-AA, H2-AB1, H2-DMA, FCGR1, CD74, B2M	91	23	13588	58.429	9.4222e-10	2.35555e-10	1.8626e-09
INTERPRO	IPR003006:Immunoglobulin/major histocompatibility complex, conserved site	13	10.4839	1.53732e-12	H2-K1, LOC100044874, H2-L, H2-M3, H2-GS10, H2-D1, H2-AB1, LOC68395, H2-Q6, H2-Q7, H2-Q8, B2M, H2-T9, H2-EB1, H2-T22, H2-AA, H2-T23, H2-T10, H2-DMA, TAPBPL	116	98	17763	20.3131	3.55122e-10	1.77561e-10	1.97228e-09
KEGG_PATHWAY	mmu04940:Type I diabetes mellitus	12	9.67742	1.85292e-12	H2-K1, LOC100044874, H2-L, H2-M3, H2-D1, H2-AB1, GZMB, LOC68395, H2-Q6, H2-Q7, H2-Q8, H2-T9, H2-EB1, H2-AA, H2-T22, H2-T23, H2-T10, FAS, H2-DMA	49	63	5738	22.3052	1.01913e-10	5.09565e-11	1.82254e-09
KEGG_PATHWAY	mmu04612:Antigen processing and presentation	13	10.4839	5.26694e-12	H2-K1, LOC100044874, H2-L, H2-M3, H2-D1, H2-AB1, LOC68395, H2-Q6, H2-Q7, H2-Q8, CD74, B2M, H2-T9, TAP1, H2-EB1, H2-T22, H2-AA, H2-T23, H2-T10, H2-DMA	49	91	5738	16.7289	2.89679e-10	9.65598e-11	5.18043e-09
UP_SEQ_FEATURE	region of interest:Connecting peptide	9	7.25806	6.69515e-12	H2-K1, LOC100044874, H2-L, H2-D1, H2-AB1, LOC68395, H2-Q6, H2-Q7, H2-Q8, CRYBB1, H2-EB1, H2-AA, H2-T23, H2-DMA	105	28	16021	49.0439	2.77181e-09	1.38591e-09	9.38525e-09
GOTERM_BP_FAT	GO:0019884~antigen processing and presentation of exogenous antigen	9	7.25806	7.52161e-12	H2-K1, LOC100044874, H2-M3, H2-EB1, H2-AA, H2-AB1, H2-DMA, FCGR1, CD74, B2M	91	28	13588	47.9953	5.81424e-09	1.16285e-09	1.14937e-08
KEGG_PATHWAY	mmu05320:Autoimmune thyroid disease	12	9.67742	8.6176e-12	H2-K1, LOC100044874, H2-L, H2-M3, H2-D1, H2-AB1, GZMB, LOC68395, H2-Q6, H2-Q7, H2-Q8, H2-T9, H2-EB1, H2-AA, H2-T22, H2-T23, H2-T10, FAS, H2-DMA	49	72	5738	19.517	4.73965e-10	1.18491e-10	8.47608e-09
GOTERM_BP_FAT	GO:0006952~defense response	20	16.129	7.9247e-11	CXCL5, H2-D1, RSAD2, LOC68395, TLR4, CD74, CCL7, CXCL10, B2M, TAP1, H2-K1, LOC100044874, IRGM1, H2-L, H2-M3, C4B, IFI47, SAMHD1, H2-Q6, FCGR1, H2-Q7, H2-Q8, CCL12, IRF8, H2-AA	91	448	13588	6.66601	6.1258e-08	1.02097e-08	1.21096e-07
GOTERM_CC_FAT	GO:0042612~MHC class I protein complex	9	7.25806	1.14467e-10	H2-K1, LOC100044874, H2-L, H2-M3, H2-GS10, H2-D1, LOC68395, H2-Q6, H2-Q7, H2-Q8, B2M, C920025E04RIK, H2-T9, H2-T22, H2-T23, H2-T10	76	42	12504	35.2556	1.75135e-08	8.75674e-09	1.37161e-07
GOTERM_BP_FAT	GO:0002474~antigen processing and presentation of peptide antigen via MHC class I	7	5.64516	8.32324e-10	H2-K1, LOC100044874, H2-L, H2-D1, LOC68395, H2-T23, H2-Q6, TAPBPL, H2-Q7, FCGR1, H2-Q8, B2M	91	17	13588	61.4842	6.43386e-07	9.19123e-08	1.27186e-06
UP_SEQ_FEATURE	region of interest:Alpha-2	6	4.83871	4.68601e-09	H2-K1, LOC100044874, H2-L, H2-D1, H2-AA, LOC68395, H2-T23, H2-Q6, H2-DMA, H2-Q7, H2-Q8	105	11	16021	83.226	1.94001e-06	6.46669e-07	6.56879e-06
UP_SEQ_FEATURE	region of interest:Alpha-1	6	4.83871	4.68601e-09	H2-K1, LOC100044874, H2-L, H2-D1, H2-AA, LOC68395, H2-T23, H2-Q6, H2-DMA, H2-Q7, H2-Q8	105	11	16021	83.226	1.94001e-06	6.46669e-07	6.56879e-06
GOTERM_MF_FAT	GO:0003924~GTPase activity	11	8.87097	6.47487e-09	RHOJ, GBP8, GNA13, GBP6, IGTP, IRGM2, GBP10, IIGP1, RAB13, MPA2L, GBP3, GBP2	84	128	13288	13.5945	1.03598e-06	1.03598e-06	7.81832e-06
INTERPRO	IPR001039:MHC class I, alpha chain, alpha1 and alpha2	8	6.45161	7.43061e-09	H2-K1, LOC100044874, H2-L, H2-M3, H2-GS10, H2-D1, LOC68395, H2-Q6, H2-Q7, H2-Q8, C920025E04RIK, H2-T9, H2-T22, H2-T23, H2-T10	116	41	17763	29.8789	1.71647e-06	5.72157e-07	9.53295e-06
INTERPRO	IPR007743:Interferon-inducible GTPase	6	4.83871	1.99126e-08	BC023105, IRGM1, IGTP, IRGM2, IFI47, IIGP1	116	14	17763	65.6268	4.59981e-06	1.14995e-06	2.55465e-05
INTERPRO	IPR011161:MHC class I-like antigen recognition	8	6.45161	2.72065e-08	H2-K1, LOC100044874, H2-L, H2-M3, H2-GS10, H2-D1, LOC68395, H2-Q6, H2-Q7, H2-Q8, C920025E04RIK, H2-T9, H2-T22, H2-T23, H2-T10	116	49	17763	25.0007	6.28467e-06	1.25694e-06	3.4904e-05
GOTERM_MF_FAT	GO:0005525~GTP binding	15	12.0968	3.5153e-08	GBP8, RHOJ, GNA13, GBP6, IRGM1, IRGM2, IFI47, BC023105, IGTP, GVIN1, GBP10, IIGP1, RAB13, MPA2L, GBP3, GBP2	84	354	13288	6.70299	5.62447e-06	2.81224e-06	4.24468e-05
GOTERM_CC_FAT	GO:0009897~external side of plasma membrane	12	9.67742	3.621e-08	H2-K1, LOC100044874, H2-L, H2-M3, H2-D1, H2-AB1, LOC68395, H2-Q6, FCGR1, H2-Q7, CD74, H2-Q8, IL12RB1, ITGAX, CD274, H2-AA, FAS	76	206	12504	9.58406	5.54011e-06	1.84671e-06	4.33888e-05
GOTERM_CC_FAT	GO:0042825~TAP complex	5	4.03226	4.12189e-08	TAP1, H2-AA, H2-DMA, PSMB8, PSMB9	76	7	12504	117.519	6.30646e-06	1.57662e-06	4.93907e-05
PIR_SUPERFAMILY	PIRSF001990:class I histocompatibility antigen	7	5.64516	4.23606e-08	H2-K1, LOC100044874, H2-L, H2-M3, H2-GS10, H2-D1, LOC68395, H2-Q6, H2-Q7, H2-Q8, H2-T9, H2-T22, H2-T23, H2-T10	72	24	8136	32.9583	2.41455e-06	2.41455e-06	4.19887e-05
GOTERM_MF_FAT	GO:0019001~guanyl nucleotide binding	15	12.0968	4.80987e-08	GBP8, RHOJ, GNA13, GBP6, IRGM1, IRGM2, IFI47, BC023105, IGTP, GVIN1, GBP10, IIGP1, RAB13, MPA2L, GBP3, GBP2	84	363	13288	6.5368	7.69577e-06	2.56526e-06	5.80786e-05
GOTERM_MF_FAT	GO:0032561~guanyl ribonucleotide binding	15	12.0968	4.80987e-08	GBP8, RHOJ, GNA13, GBP6, IRGM1, IRGM2, IFI47, BC023105, IGTP, GVIN1, GBP10, IIGP1, RAB13, MPA2L, GBP3, GBP2	84	363	13288	6.5368	7.69577e-06	2.56526e-06	5.80786e-05
KEGG_PATHWAY	mmu05416:Viral myocarditis	10	8.06452	5.71804e-08	H2-K1, LOC100044874, H2-L, H2-M3, H2-D1, H2-AB1, LOC68395, H2-Q6, H2-Q7, H2-Q8, H2-T9, H2-EB1, H2-AA, H2-T22, H2-T23, H2-T10, H2-DMA	49	94	5738	12.4577	3.14492e-06	6.28984e-07	5.62417e-05
SP_PIR_KEYWORDS	heterodimer	7	5.64516	1.23699e-07	H2-K1, LOC100044874, H2-L, H2-EB1, H2-D1, H2-AA, H2-AB1, H2-T23, B2M	107	40	17854	29.2005	1.96679e-05	9.834e-06	0.000149205
GOTERM_CC_FAT	GO:0042824~MHC class I peptide loading complex	5	4.03226	1.47043e-07	TAP1, H2-AA, H2-DMA, PSMB8, PSMB9	76	9	12504	91.4035	2.24973e-05	4.4995e-06	0.000176195
INTERPRO	IPR003191:Guanylate-binding protein, C-terminal	5	4.03226	2.04866e-07	GBP8, GBP6, GBP10, MPA2L, GBP3, GBP2	116	9	17763	85.0718	4.73229e-05	7.8873e-06	0.000262828
GOTERM_CC_FAT	GO:0009986~cell surface	13	10.4839	2.36329e-07	H2-K1, LOC100044874, H2-L, H2-M3, H2-D1, LOC68395, H2-AB1, H2-Q6, H2-Q7, FCGR1, H2-Q8, CD74, IL12RB1, ITGAX, CD274, H2-AA, FAS, FGFBP1	76	305	12504	7.0126	3.61576e-05	6.02636e-06	0.000283182
GOTERM_CC_FAT	GO:0044459~plasma membrane part	28	22.5806	3.62293e-07	GNA13, RHOJ, OSMR, H2-D1, RSAD2, LOC68395, CD74, B2M, IL12RB1, SORBS1, ITGAX, H2-T10, FAS, H2-K1, LOC100044874, H2-L, H2-M3, H2-GS10, H2-AB1, H2-Q6, CACNA1S, H2-Q7, FCGR1, H2-Q8, C920025E04RIK, H2-T9, CD274, H2-EB1, CYBRD1, H2-AA, H2-T22, H2-T23, RAB13, H2-DMA, GBP2	76	1633	12504	2.82103	5.54293e-05	7.91866e-06	0.000434119
PIR_SUPERFAMILY	PIRSF005552:guanine nucleotide-binding protein 1	5	4.03226	3.63081e-07	GBP8, GBP6, GBP10, MPA2L, GBP3, GBP2	72	8	8136	70.625	2.06954e-05	1.03478e-05	0.000359893
SP_PIR_KEYWORDS	mhc i	5	4.03226	3.75111e-07	H2-K1, LOC100044874, H2-L, H2-D1, LOC68395, H2-T23, H2-Q6, H2-Q7, H2-Q8, B2M	107	11	17854	75.8454	5.96409e-05	1.98807e-05	0.000452456
KEGG_PATHWAY	mmu04514:Cell adhesion molecules (CAMs)	11	8.87097	3.94287e-07	H2-K1, LOC100044874, H2-L, H2-M3, H2-D1, H2-AB1, LOC68395, H2-Q6, H2-Q7, H2-Q8, H2-T9, CD274, H2-EB1, H2-AA, H2-T22, H2-T23, H2-T10, H2-DMA	49	154	5738	8.36443	2.16855e-05	3.61429e-06	0.000387813
INTERPRO	IPR015894:Guanylate-binding protein, N-terminal	5	4.03226	1.13948e-06	GBP8, GBP6, GBP10, MPA2L, GBP3, GBP2	116	13	17763	58.8959	0.000263185	3.76021e-05	0.00146186
GOTERM_MF_FAT	GO:0042605~peptide antigen binding	5	4.03226	1.3507e-06	H2-K1, LOC100044874, H2-M3, H2-AA, LOC68395, H2-AB1, H2-Q6, H2-Q7, H2-Q8	84	14	13288	56.4966	0.000216089	5.40267e-05	0.00163095
INTERPRO	IPR007110:Immunoglobulin-like	17	13.7097	1.73213e-06	H2-K1, LOC100044874, H2-L, H2-M3, H2-GS10, H2-D1, FCGR4, H2-AB1, SLAMF8, LOC68395, H2-Q6, FCGR1, H2-Q7, H2-Q8, B2M, H2-T9, CD274, H2-EB1, H2-T22, H2-AA, H2-T23, H2-T10, TAPBPL, H2-DMA	116	604	17763	4.30993	0.000400042	5.0014e-05	0.00222218
GOTERM_BP_FAT	GO:0002252~immune effector process	9	7.25806	1.79385e-06	C4B, H2-AA, SAMHD1, RSAD2, LOC68395, FAS, H2-Q6, H2-DMA, H2-Q7, FCGR1, CD74, H2-Q8	91	126	13588	10.6656	0.00138569	0.000173316	0.00274111
GOTERM_MF_FAT	GO:0032555~purine ribonucleotide binding	29	23.3871	2.06047e-06	GNA13, RHOJ, UBA7, SLFN8, TRIB3, BC023105, IGTP, NAIP2, OASL2, TAP1, GBP10, IIGP1, CDH29, MPA2L, GBP8, GBP6, IRGM1, IRGM2, UBE2L6, IFI47, PSMB8, SRPK1, PSMB9, KHK, GVIN1, OAS1B, H2-AA, RAB13, H2-DMA, GBP3, GBP2	84	1796	13288	2.5543	0.000329622	6.5933e-05	0.00248797
GOTERM_MF_FAT	GO:0032553~ribonucleotide binding	29	23.3871	2.06047e-06	GNA13, RHOJ, UBA7, SLFN8, TRIB3, BC023105, IGTP, NAIP2, OASL2, TAP1, GBP10, IIGP1, CDH29, MPA2L, GBP8, GBP6, IRGM1, IRGM2, UBE2L6, IFI47, PSMB8, SRPK1, PSMB9, KHK, GVIN1, OAS1B, H2-AA, RAB13, H2-DMA, GBP3, GBP2	84	1796	13288	2.5543	0.000329622	6.5933e-05	0.00248797
GOTERM_BP_FAT	GO:0002495~antigen processing and presentation of peptide antigen via MHC class II	5	4.03226	3.08202e-06	H2-EB1, H2-AA, H2-AB1, H2-DMA, CD74	91	16	13588	46.6621	0.00237957	0.000264677	0.00470946
GOTERM_BP_FAT	GO:0019886~antigen processing and presentation of exogenous peptide antigen via MHC class II	5	4.03226	3.08202e-06	H2-EB1, H2-AA, H2-AB1, H2-DMA, CD74	91	16	13588	46.6621	0.00237957	0.000264677	0.00470946
GOTERM_BP_FAT	GO:0050778~positive regulation of immune response	9	7.25806	3.18535e-06	H2-K1, LOC100044874, H2-M3, C4B, TLR4, LOC68395, H2-Q6, FCGR1, H2-Q7, H2-Q8, B2M, H2-AA, H2-DMA	91	136	13588	9.88138	0.00245925	0.000246198	0.00486736
GOTERM_MF_FAT	GO:0042287~MHC protein binding	5	4.03226	4.05113e-06	H2-AA, H2-DMA, CD74, PSMB8, PSMB9	84	18	13288	43.9418	0.000647972	0.000108025	0.00489158
GOTERM_MF_FAT	GO:0017076~purine nucleotide binding	29	23.3871	4.64371e-06	GNA13, RHOJ, UBA7, SLFN8, TRIB3, BC023105, IGTP, NAIP2, OASL2, TAP1, GBP10, IIGP1, CDH29, MPA2L, GBP8, GBP6, IRGM1, IRGM2, UBE2L6, IFI47, PSMB8, SRPK1, PSMB9, KHK, GVIN1, OAS1B, H2-AA, RAB13, H2-DMA, GBP3, GBP2	84	1871	13288	2.45191	0.00074272	0.000106137	0.00560708
GOTERM_BP_FAT	GO:0002504~antigen processing and presentation of peptide or polysaccharide antigen via MHC class II	5	4.03226	6.46465e-06	H2-EB1, H2-AA, H2-AB1, H2-DMA, CD74	91	19	13588	39.2944	0.00498473	0.000454187	0.00987804
[truncated: 231 more rows]

## Sheet: Lightcyan
Category	Term			Count	%	PValue	Genes	List Total	Pop Hits	Pop Total	Fold Enrichment	Bonferroni	Benjamini	FDR
[truncated: 24 more rows]

[truncated: 7 more sheets: Grey60, Greenyellow, Green, Cyan, Brown, Blue, Black]
